# Supplementary material for: Tetraphenylporphyrin electrocatalysts for the hydrogen evolution reaction: applicability of molecular volcano plots to experimental operating conditions
Source: Royal Society of Chemistry journal article supplement (doi:10.1039/d3dt01250f), 2023-01-01
Supplement: d3dt01250f1.pdf [file d3dt01250f1.pdf]

# Tetraphenylporphyrin Electrocatalysts for the Hydrogen Evolution Reaction: Applicability of Molecular Volcano Plots to Experimental Operating Conditions

## *Supporting information*

*Felicia Zaar<sup>a</sup>, C. Moyses Araujo<sup>b,c</sup>, Rikard Emanuelsson<sup>d</sup>, Maria Strømme<sup>a</sup>, Martin Sjödin<sup>a\*</sup>*

<sup>a</sup>Department of Materials Science and Engineering, Division of Nanotechnology and Functional Materials, Uppsala University, Box 35, SE-751 03 Uppsala, Sweden

\*martin.sjodin@angstrom.uu.se

<sup>b</sup>Materials Theory Division, Department of Physics and Astronomy, Ångström Laboratory, Uppsala University, Box 516, SE-751 20 Uppsala, Sweden

<sup>c</sup>Department of Engineering and Physics, Karlstad University, 651 88 Karlstad, Sweden.

<sup>d</sup>Department of Chemistry – BMC, Uppsala University, Box 576, SE-751 23 Uppsala, Sweden.

# Contents

|                                                                           |           |
|---------------------------------------------------------------------------|-----------|
| <b>1 Electrochemical and spectroscopic characterization.....</b>          | <b>3</b>  |
| 1.1 Additional Experimental results.....                                  | 3         |
| 1.2 Literature study of porphyrin redox chemistry .....                   | 8         |
| 1.3 UV/Vis absorbance .....                                               | 13        |
| <b>2 Compoutational study .....</b>                                       | <b>13</b> |
| 2.1 Reaction scheme.....                                                  | 13        |
| 2.2 Population analysis .....                                             | 14        |
| 2.3 Energies and energy correction .....                                  | 20        |
| <b>3 Catalysis.....</b>                                                   | <b>24</b> |
| 3.1 CVs before and after catalysis.....                                   | 24        |
| 3.2 UV/vis absorbance of BzOH.....                                        | 25        |
| 3.3 EPEP kinetics .....                                                   | 25        |
| 3.4 Reaction rates and reaction orders at reference potentials .....      | 26        |
| 3.5 Reaction rates from the Tafel equation .....                          | 32        |
| 3.6 Reaction rates and reaction orders from current plateau analysis..... | 38        |
| 3.7 Reaction rates from FOWA analysis.....                                | 39        |
| 3.7.1 FOWA using $E_{cat/2} \approx E_{1/2}^{0/1-}$ .....                 | 42        |
| 3.7.2 FOWA using $E_{cat/2} \approx E_{infl}$ .....                       | 46        |
| 3.7.3 FOWA using $E_{cat/2} \approx E_{i_{cat/2}}$ .....                  | 52        |
| <b>References .....</b>                                                   | <b>57</b> |
| <b>Appendix 1.....</b>                                                    | <b>59</b> |

# 1 Electrochemical and spectroscopic characterization

## 1.1 Additional Experimental results

Figure S1 shows the SWVs of the porphyrins studied under catalytic conditions in this work. Figure S2 shows CVs of CoTPP with and without the  $L^0/L^{1-}$  transition. Figure S3, Figure S4 and Table S1 show the CVs of the porphyrins studied only experimentally in this work, the SWVs of the porphyrins studied only experimentally in this work, and a summary of the electrochemical results obtained, respectively<sup>†</sup>. Note that what is here reported as the M(III)/M(II) transition for Al(III)TPPCL, may represent a convolution of the M(III)/M(II) and  $L^{1+}/L^0$  transitions. These peaks have previously been reported to appear within about 0.2 V of each other<sup>1</sup> and in both the CV and SWV reported here, the width of the peak in the relevant potential region may cover both transitions. However, it should also be noted that the  $L^{1+}/L^0$  transition have been reported to occur at 0.4 vs. Fc/Fc<sup>+</sup> in DCM<sup>2</sup> which is close to the value reported here (0.36 V vs. Fc/Fc<sup>+</sup>).

---

<sup>†</sup> Dimethylformamide (DMF, AnalaR NORMAPUR® ACS, Reag. Ph. Eur. analytical reagent, ≥99.8%) used for characterization of CoTPP was purchased from VWR chemicals.

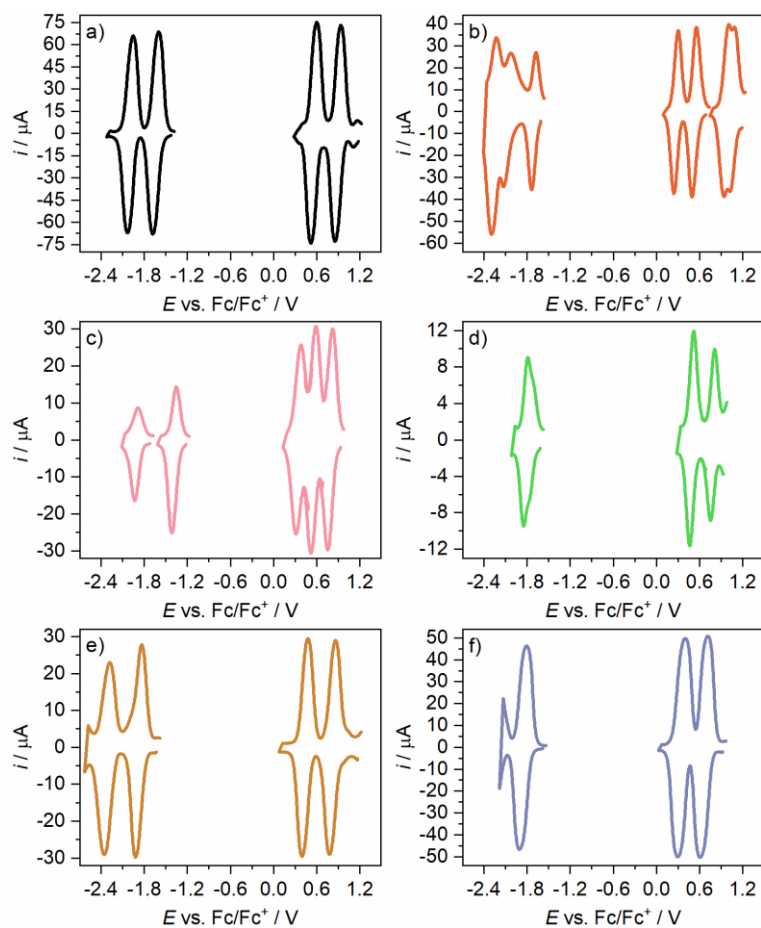

**Figure S1.** SWV of a) H<sub>2</sub>TPP, b) FeTPP, c) CoTPP, d) NiTPP, e) CuTPP and f) ZnTPP.

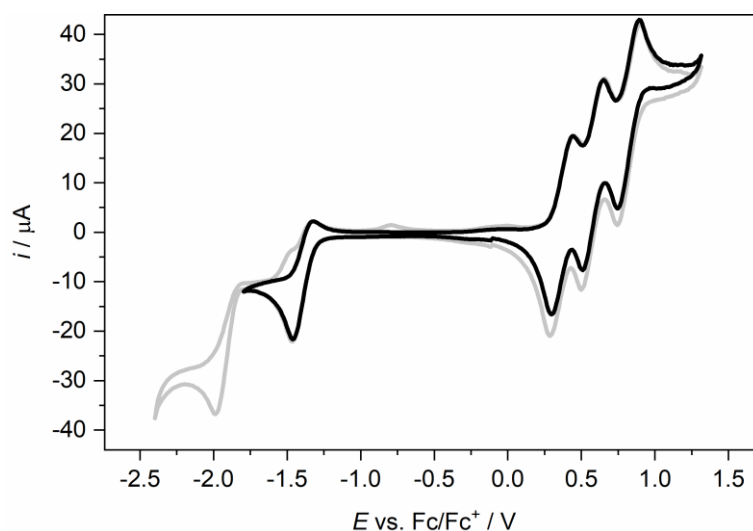

**Figure S2.** CV of CoTPP with and without the L<sup>0</sup>/L<sup>1-</sup> transition.



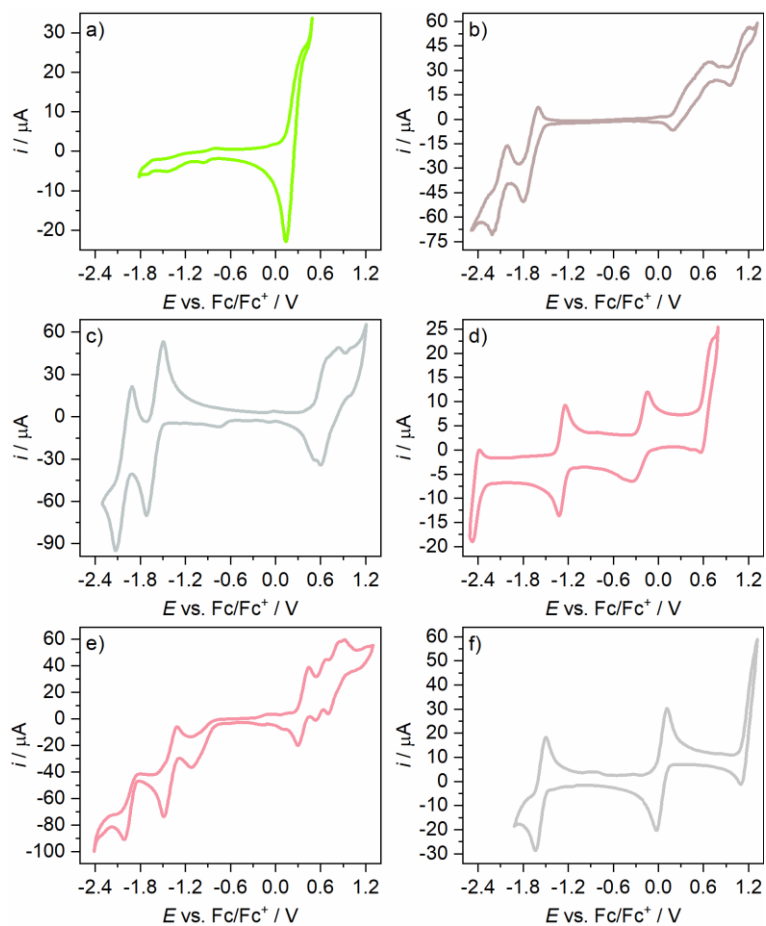

**Figure S3.** CV of a)  $MgTPP$ , b)  $Al(III)TPPCl$ , c)  $O=Ti(IV)TPP$ , d)  $CoTPP$  in DMF, e)  $Co(III)TPPCl$  and f)  $AgTPP$ .

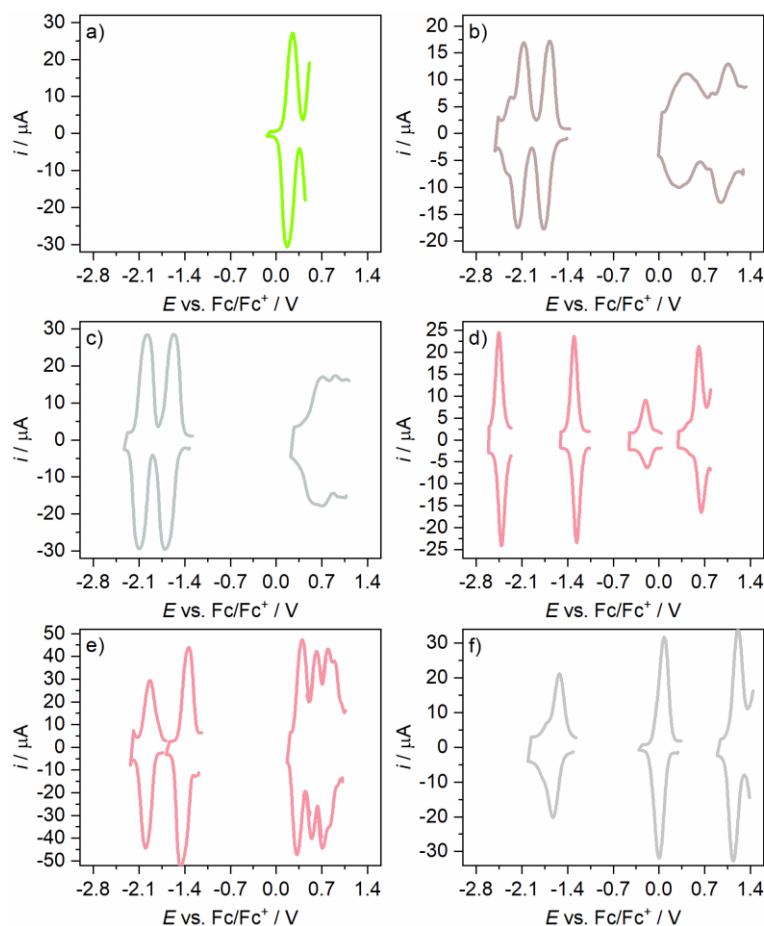

**Figure S4.** SWV of a) MgTPP, b) Al(III)TPP, c) O=Ti(IV)TPP, d) CoTPP in DMF, e) Co(III)TPP and f) AgTPP.

**Table S1.** Porphyrin redox chemistry obtained experimentally in this work (V vs. Fc/Fc<sup>+</sup>, 0.1 M TBAPF<sub>6</sub>/DCM. CV: 0.1 V/s. SWV: 15 Hz, 4 mV increment, 25 mV amplitude).

| Porphyrin                       | Quantity      | L <sup>1</sup> /L <sup>2-</sup> | L <sup>0</sup> /L <sup>1-</sup> | M(II)/M(I) | M(III)/M(II) | L <sup>1+</sup> /L <sup>0</sup> | L <sup>2+</sup> /L <sup>1+</sup> |
|---------------------------------|---------------|---------------------------------|---------------------------------|------------|--------------|---------------------------------|----------------------------------|
| H <sub>2</sub> TPP <sup>a</sup> | $E_{p,c}$     | -2.08                           | -1.74                           |            |              | 0.49                            | 0.83                             |
|                                 | $E_{p,a}$     | -1.94                           | -1.59                           |            |              | 0.62                            | 0.99                             |
|                                 | $\Delta E_p$  | 0.14                            | 0.15                            |            |              | 0.13                            | 0.14                             |
|                                 | $E^{0'}(CV)$  | -2.01                           | -1.67                           |            |              | 0.55                            | 0.89                             |
|                                 | $E^{0'}(SWV)$ | -1.99                           | -1.64                           |            |              | 0.56                            | 0.90                             |
| FeTPP                           | $E_{p,c}$     |                                 |                                 | -1.75      | 0.24         | 0.5                             | 0.95                             |
|                                 | $E_{p,a}$     |                                 |                                 | -1.62      | 0.37         | 0.63                            | 1.20                             |
|                                 | $\Delta E_p$  |                                 |                                 | 0.13       | 0.13         | 0.13                            | 0.25                             |
|                                 | $E^{0'}(CV)$  |                                 |                                 | -1.68      | 0.32         | 0.58                            | 1.08                             |
|                                 | $E^{0'}(SWV)$ | -2.26                           | -2.07                           | -1.71      | 0.27         | 0.53                            | 0.97                             |
| CoTPP                           | $E_{p,c}$     |                                 | -1.98                           | -1.46      | 0.29         | 0.50                            | 0.74                             |
|                                 | $E_{p,a}$     |                                 | ~-1.46,<br>-0.79                | -1.32      | 0.45         | 0.66                            | 0.90                             |
|                                 | $\Delta E_p$  |                                 | N/A                             | 0.14       | 0.16         | 0.16                            | 0.16                             |
|                                 | $E^{0'}(CV)$  |                                 | N/A                             | -1.39      | 0.37         | 0.58                            | 0.82                             |
|                                 | $E^{0'}(SWV)$ |                                 | -1.91                           | -1.39      | 0.34         | 0.55                            | 0.79                             |
| NiTPP                           | $E_{p,c}$     |                                 | -1.87                           |            |              | 0.46                            | 0.73                             |

|                           |                |       |        |       |       |       |       |
|---------------------------|----------------|-------|--------|-------|-------|-------|-------|
|                           | $E_{p,a}$      |       | -1.70  |       |       | 0.54  | 0.83  |
|                           | $\Delta E_p$   |       | 0.17   |       |       | 0.08  | 0.10  |
|                           | $E^{0'} (CV)$  |       | -1.79  |       |       | 0.5   | 0.78  |
|                           | $E^{0'} (SWV)$ |       | -1.82  |       |       | 0.49  | 0.78  |
|                           | $E_{p,c}$      |       | -1.95  |       |       | 0.37  | 0.75  |
|                           | $E_{p,a}$      |       | -1.80  |       |       | 0.51  | 0.89  |
| CuTPP                     | $\Delta E_p$   |       | 0.15   |       |       | 0.14  | 0.14  |
|                           | $E^{0'} (CV)$  |       | -1.88  |       |       | 0.44  | 0.82  |
|                           | $E^{0'} (SWV)$ | -2.32 | -1.88  |       |       | 0.44  | 0.82  |
|                           | $E_{p,c}$      |       | -1.96  |       |       | 0.24  | 0.56  |
|                           | $E_{p,a}$      |       | -1.78  |       |       | 0.44  | 0.76  |
| ZnTPP                     | $\Delta E_p$   |       | 0.18   |       |       | 0.20  | 0.20  |
|                           | $E^{0'} (CV)$  |       | -1.87  |       |       | 0.34  | 0.66  |
|                           | $E^{0'} (SWV)$ |       | -1.85  |       |       | 0.36  | 0.66  |
|                           | $E_{p,c}$      |       |        |       |       | 0.13  |       |
|                           | $E_{p,a}$      |       |        |       |       | ~0.39 |       |
| MgTPP                     | $\Delta E_p$   |       |        |       |       | 0.26  |       |
|                           | $E^{0'} (CV)$  |       |        |       |       | 0.26  |       |
|                           | $E^{0'} (SWV)$ |       |        |       |       | 0.21  |       |
|                           | $E_{p,c}$      | -2.20 | -1.79  |       | 0.71  |       | 0.91  |
|                           | $E_{p,a}$      | -2.02 | -1.59  |       | 0.19  |       | 1.21  |
| Al(III)TPPCl <sup>b</sup> | $\Delta E_p$   | -0.18 | 0.20   |       | 0.52  |       | 0.30  |
|                           | $E^{0'} (CV)$  | -2.11 | -1.69  |       | 0.45  |       | 1.06  |
|                           | $E^{0'} (SWV)$ | -2.12 | -1.72  |       | 0.36  |       | 1.01  |
|                           | $E_{p,c}$      | -2.13 | -1.71  |       |       | ~0.51 | 0.60  |
|                           | $E_{p,a}$      | -1.91 | -1.49  |       |       | ~0.69 | 0.82  |
| O=Ti(IV)TPP               | $\Delta E_p$   | 0.22  | 0.22   |       |       | 0.18  | 0.22  |
|                           | $E^{0'} (CV)$  | -2.02 | -1.60  |       |       | 0.60  | 0.71  |
|                           | $E^{0'} (SWV)$ | -2.04 | -1.64  |       |       | 0.71  | 0.74  |
|                           | $E_{p,c}$      |       | -2.47  | -1.32 | -0.33 | 0.56  |       |
|                           | $E_{p,a}$      |       | -2.38  | -1.25 | -0.15 | ~0.73 |       |
| CoTPP in DMF              | $\Delta E_p$   |       | 0.11   | 0.07  | 0.18  | 0.17  |       |
|                           | $E^{0'} (CV)$  |       | -2.41  | -1.28 | -0.24 | 0.63  |       |
|                           | $E^{0'} (SWV)$ |       | -2.42  | -1.27 | -0.19 | 0.64  |       |
|                           | $E_{p,c}$      |       | -2.01  | -1.49 | 0.29  | 0.53  | 0.71  |
|                           | $E_{p,a}$      |       | ~-1.83 | -1.32 | 0.44  | 0.68  | 0.92  |
| Co(III)TPPCl              | $\Delta E_p$   |       | 0.18   | 0.17  | 0.15  | 0.15  | 0.21  |
|                           | $E^{0'} (CV)$  |       | -1.92  | -1.4  | 0.37  | 0.59  | 0.82  |
|                           | $E^{0'} (SWV)$ |       | -1.97  | -1.4  | 0.36  | 0.58  | 0.75  |
|                           | $E_{p,c}$      |       | -1.64  | -0.02 |       |       | 1.09  |
|                           | $E_{p,a}$      |       | -1.49  | 0.12  |       |       | ~1.27 |
| AgTPP                     | $\Delta E_p$   |       | 0.15   | 0.14  |       |       | 0.18  |
|                           | $E^{0'} (CV)$  |       | -1.56  | 0.07  |       |       | 1.18  |
|                           | $E^{0'} (SWV)$ |       | -1.64  | -1.57 | 0.04  | 1.17  | 1.09  |

<sup>a</sup>CV data previously reported in ref. 3. <sup>b</sup>What is marked as the M(III)/M(II) transition for this compound may represent a convolution of the M(III)/M(II) and L<sup>1+</sup>/L<sup>0</sup> transitions.

## 1.2 Literature study of porphyrin redox chemistry

Figure S5, Figure S6 and Table S2 summarize experimentally obtained and previously reported half-wave potentials for tetraphenylporphyrins. In Figure S5, only results obtained in DCM are shown.

**Fel! Hittar inte referenskälla. S6 and Fel! Hittar inte referenskälla. S2** show results from multiple solvents. Figure S5 and Figure S6 show half-wave potentials vs.  $Fc/Fc^+$ , with all values originally measured against other reference potentials converted according to Table S3.

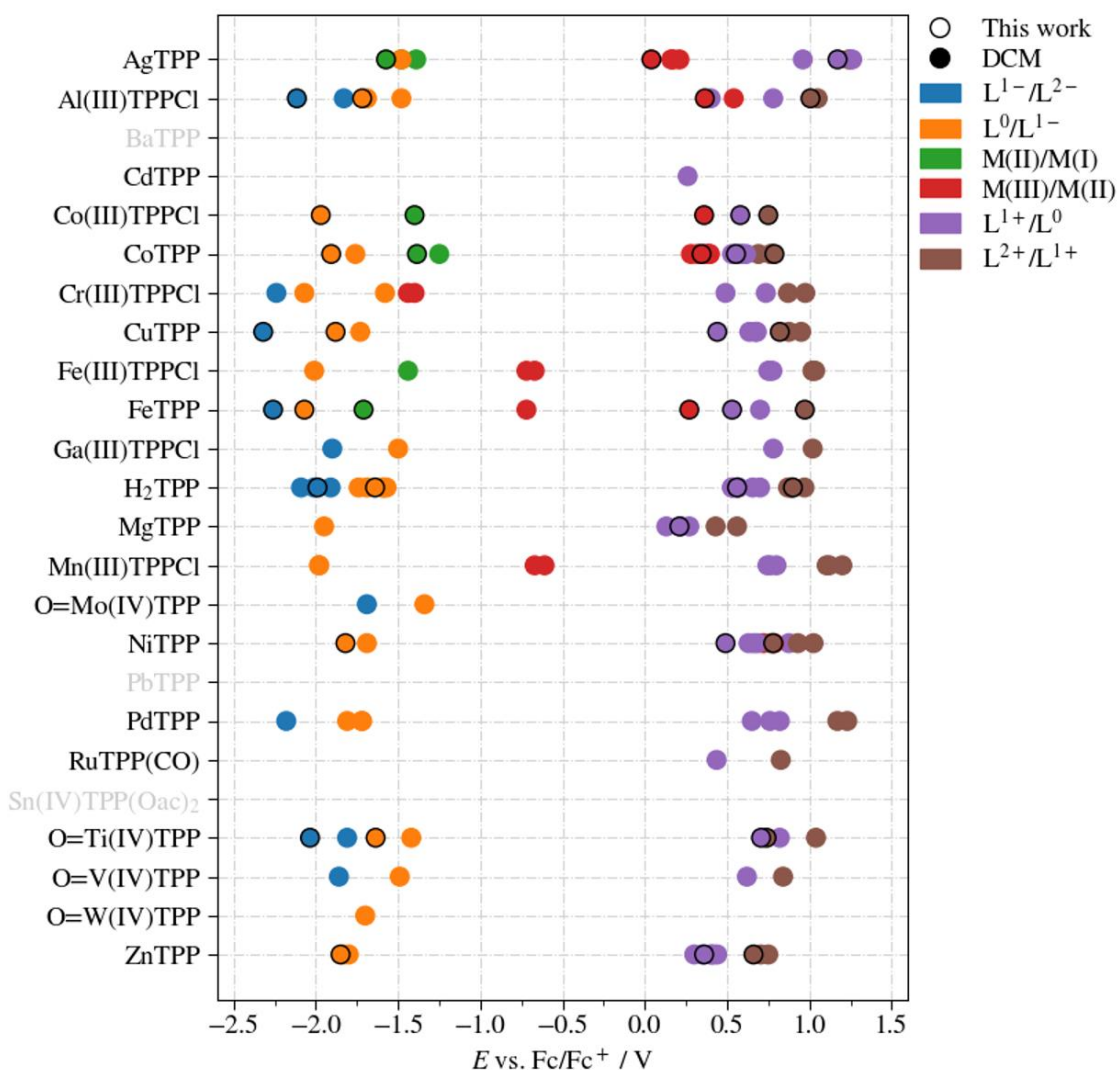

**Figure S5.** Half-wave potentials in DCM as measured in this work, and as previously reported. No values were found for BaTPP, PbTPP or Sn(IV)TPP(OAc)<sub>2</sub>.

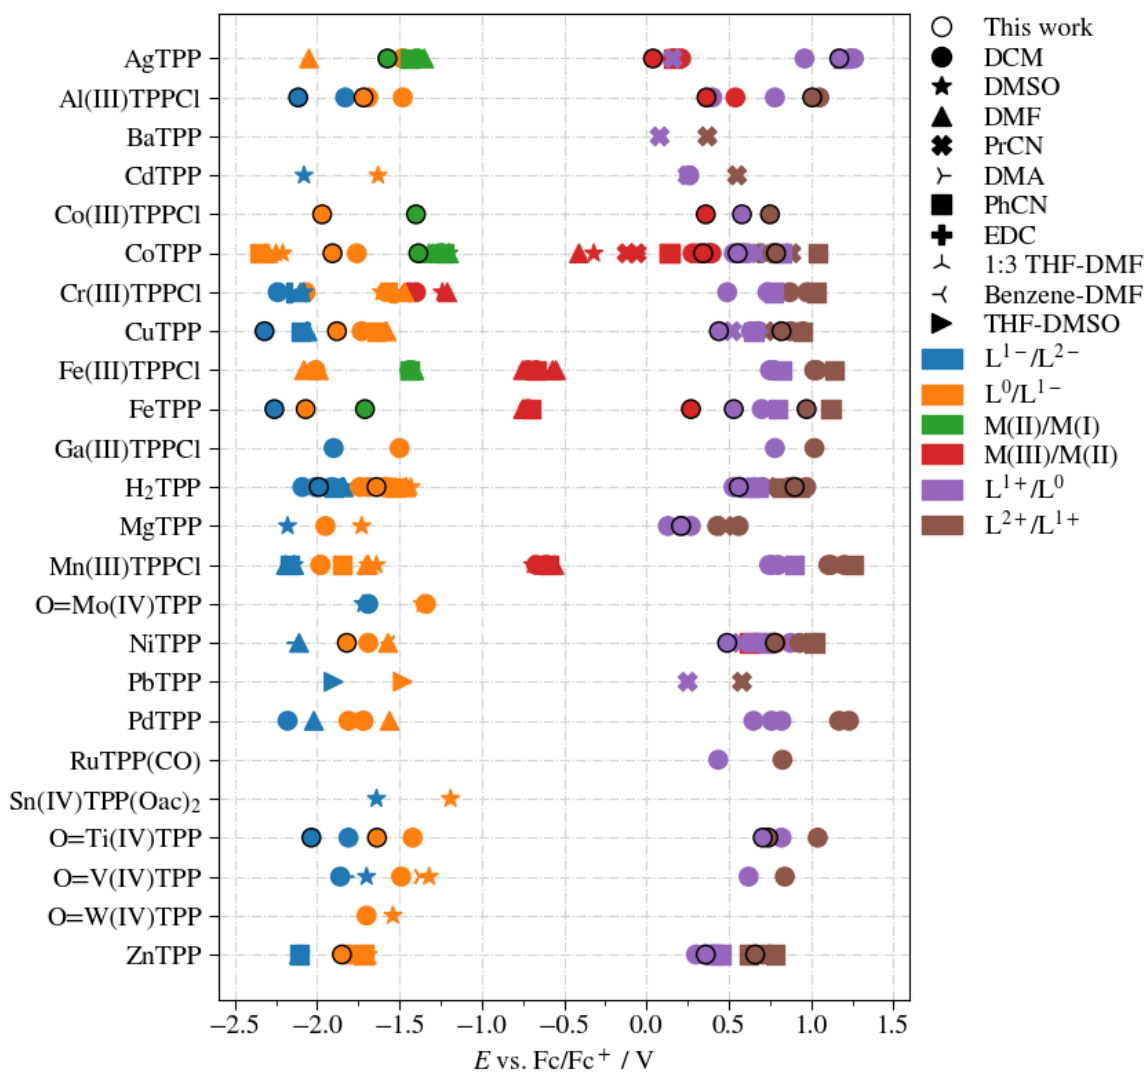

**Figure S6.** Half-wave potentials for tetraphenylporphyrins in different solvents as measured in this work, and as previously reported.

**Table S2.** Half-wave potentials of tetraphenylporphyrins measured in various solvents and against various reference electrodes.

| Porphyrin    | $L^1-/L^2-$ | $L^0/L^1-$ | $M(II)/M(I)$ | $M(III)/M(II)$ | $L^1+/L^0$ | $L^2+/L^1+$ | Solvent | RE                 | Ref.      |
|--------------|-------------|------------|--------------|----------------|------------|-------------|---------|--------------------|-----------|
| AgTPP        |             |            | -1.01        | 0.59           |            | 1.62        | DCM     | SCE                | 4         |
| AgTPP        |             |            | -1.03        | 0.58           |            |             | DMSO    | SCE                | 4         |
| AgTPP        |             |            | -1.10        |                |            |             | DCM     | SCE                | 5         |
| AgTPP        |             | -1.67      | -0.97        |                |            |             | DMF     | SCE                | 5         |
| AgTPP        |             | -1.10      |              | 0.55           | 1.64       |             | DCM     | SCE                | 6         |
| AgTPP        |             |            | -1.06        | 0.54           | 1.57       |             | PhCN    | PhCN               | 7         |
| AgTPP        |             |            |              | 0.54           | 1.34       |             | DCM     | DCM                | 8         |
| AgTPP        |             |            |              |                | 0.54       |             | PrCN    | PrCN               | 9         |
| AgTPP        |             |            | -1.57        | 0.04           |            | 1.17        | DCM     | Fc/Fc <sup>+</sup> | This work |
| Al(III)TPPCl |             | -1.69      |              |                | 0.40       |             | DCM     | Fc/Fc <sup>+</sup> | 2         |
| Al(III)TPPCl | -1.45       | -1.10      |              | 0.92           | 1.16       | 1.43        | DCM     | SCE                | 1         |

|                      |       |       |       |       |      |      |             |                    |           |
|----------------------|-------|-------|-------|-------|------|------|-------------|--------------------|-----------|
| Al(III)TPPCl         | -2.12 | -1.72 |       | 0.36  |      | 1.01 | DCM         | Fc/Fc <sup>+</sup> | This work |
| BaTPP                |       |       |       |       | 0.46 | 0.75 | PrCN        | SCE                | 9         |
| CdTPP                |       |       |       |       | 0.64 |      | DCM         | SCE                | 10        |
| CdTPP                | -1.70 | -1.25 |       |       |      |      | DMSO        | SCE                | 11        |
| CdTPP                |       |       |       |       | 0.63 | 0.93 | PrCN        | SCE                | 9         |
| CoTPP                |       | -1.38 | -0.87 | 0.70  | 0.97 | 1.15 | DCM         | SCE                | 12        |
| CoTPP                |       |       |       | 0.66  | 0.96 |      | DCM         | SCE                | 13        |
| CoTPP                |       |       |       | 0.52  | 1.19 | 1.42 | PhCN        | SCE                | 14        |
| CoTPP                |       | -1.92 | -0.82 |       |      |      | DMF         | SCE                | 15        |
| CoTPP                |       | -1.87 | -0.82 |       |      |      | DMSO        | SCE                | 11        |
| CoTPP                |       | -1.83 | -0.85 | 0.06  |      |      | DMSO        | SCE                | 16        |
| CoTPP                |       |       | -0.84 | 0.32  |      |      | DMA         | SCE                | 16        |
| CoTPP                |       |       | -0.89 | 0.26  |      |      | PrCN        | SCE                | 16        |
| CoTPP                |       |       | -0.87 | -0.03 |      |      | DMF         | SCE                | 16        |
| CoTPP                |       |       |       | 0.75  | 0.91 | 1.07 | DCM         | SCE                | 16        |
| CoTPP                |       |       |       | 0.32  | 1.06 | 1.26 | PrCN        | SCE                | 9         |
| CoTPP                |       |       | -0.94 |       |      |      | DMF         | SCE                | 13        |
| CoTPP                |       |       |       | 0.81  | 1.03 | 1.18 | DCM         | AgCl               | 17        |
| CoTPP                |       | -1.97 | -0.85 | 0.52  | 1.20 |      | PhCN        | SCE                | 17        |
| CoTPP                |       | -2.4  | -1.27 | -0.19 | 0.64 |      | DMF         | Fc/Fc <sup>+</sup> | This work |
| CoTPP                |       | -1.91 | -1.31 | 0.34  | 0.55 | 0.79 | DCM         | Fc/Fc <sup>+</sup> | This work |
| H-CoTPP <sup>a</sup> |       | -1.80 |       |       |      |      | DCM         | Fc/Fc <sup>+</sup> | This work |
| H-CoTPP <sup>b</sup> |       | -1.80 |       |       |      |      | DCM         | Fc/Fc <sup>+</sup> | This work |
| Co(III)TPPCl         |       | -1.97 | -1.4  | 0.36  | 0.58 | 0.75 | DCM         | Fc/Fc <sup>+</sup> | This work |
| Cr(III)TPPCl         | -1.79 | -1.16 |       |       |      |      | EDC         | SCE                | 18        |
| Cr(III)TPPCl         |       | -1.69 |       | -1.06 | 0.87 | 1.25 | DCM         | SCE                | 19        |
| Cr(III)TPPCl         | -1.86 | -1.20 |       | -1.02 |      |      | DCM         | SCE                | 20        |
| Cr(III)TPPCl         | -1.70 | -1.23 |       | -0.86 |      |      | DMSO        | SCE                | 21        |
| Cr(III)TPPCl         |       |       |       |       | 1.15 | 1.41 | PhCN        | SCE                | 21        |
| Cr(III)TPPCl         | -1.72 | -1.09 |       | -0.83 |      |      | DMF         | SCE                | 22        |
| Cr(III)TPPCl         |       |       |       |       | 1.15 | 1.39 | DCM         | AgCl               | 17        |
| CuTPP                |       |       |       |       | 1.05 |      | DCM         | SCE                | 13        |
| CuTPP                |       | -1.35 |       |       | 1.06 | 1.33 | DCM         | SCE                | 23        |
| CuTPP                | -1.68 | -1.20 |       |       |      |      | DMF         | SCE                | 15        |
| CuTPP                | -1.68 | -1.20 |       |       |      |      | 1:3 THF-DMF | SCE                | 11        |
| CuTPP                |       |       |       |       | 0.90 | 1.16 | PrCN        | SCE                | 9         |
| CuTPP                | -1.68 | -1.20 |       |       |      |      | DMF         | SCE                | 24        |
| CuTPP                | -1.72 | -1.26 |       |       | 1.03 | 1.33 | PhCN        | SCE                | 7         |
| CuTPP                |       |       |       |       | 1.05 | 1.29 | DCM         | AgCl               | 17        |
| CuTPP                | -2.32 | -1.88 |       |       | 0.44 | 0.82 | DCM         | Fc/Fc <sup>+</sup> | This work |
| H-CuTPP <sup>a</sup> |       | -1.79 |       |       |      |      | DCM         | Fc/Fc <sup>+</sup> | This work |
| H-CuTPP <sup>b</sup> |       | -1.77 |       |       |      |      | DCM         | Fc/Fc <sup>+</sup> | This work |
| FeTPP                |       | -1.61 | -1.03 |       |      |      | DMF         | SCE                | 25        |
| FeTPP                |       |       |       |       | 1.08 |      | DCM         | SCE                | 13        |
| FeTPP                |       |       |       | -0.32 | 1.18 | 1.50 | PhCN        | SCE                | 14        |
| FeTPP                | -2.26 | -2.07 | -1.71 | 0.27  | 0.53 | 0.97 | DCM         | Fc/Fc <sup>+</sup> | This work |
| H-FeTPP <sup>a</sup> |       | -1.61 |       |       |      |      | DCM         | Fc/Fc <sup>+</sup> | This work |
| H-FeTPP <sup>b</sup> |       | -1.49 |       |       |      |      | DCM         | Fc/Fc <sup>+</sup> | This work |
| Fe(III)TPPCl         |       | -1.61 | -1.03 | -0.19 |      |      | DMF         | SCE                | 25        |

|                                   |       |       |       |      |      |             |                    |           |
|-----------------------------------|-------|-------|-------|------|------|-------------|--------------------|-----------|
| Fe(III)TPPCl                      |       |       | -0.34 |      |      | DCM         | SCE                | 13        |
| Fe(III)TPPCl                      | -1.70 | -1.04 | -0.17 |      |      | DMF         | SCE                | 15        |
| Fe(III)TPPCl                      |       |       |       | 1.13 | 1.40 | DCM         | SCE                | 26        |
| Fe(III)TPPCl                      |       |       | -0.37 |      |      | DMF         | SCE                | 13        |
| Fe(III)TPPCl                      | -1.63 | -1.06 | -0.29 | 1.14 | 1.40 | DCM         | SCE                | 27        |
| Fe(III)TPPCl                      |       | -1.06 | -0.29 | 1.20 | 1.52 | PhCN        | SCE                | 28        |
| Fe(III)TPPCl                      |       |       |       | 1.19 | 1.45 | DCM         | AgCl               | 17        |
| Ga(III)TPPCl                      | -1.52 | -1.12 |       | 1.16 | 1.40 | DCM         | SCE                | 29        |
| H <sub>2</sub> TPP                |       |       |       | 0.95 |      | DCM         | SCE                | 13        |
| H <sub>2</sub> TPP                |       | -1.21 |       |      |      | DCM         | SCE                | 5         |
| H <sub>2</sub> TPP                | -1.52 | -1.15 |       |      |      | DMF         | SCE                | 5         |
| H <sub>2</sub> TPP                |       |       |       | 1.00 | 1.20 | PhCN        | SCE                | 14        |
| H <sub>2</sub> TPP                |       | -1.21 |       | 1.08 | 1.35 | DCM         | SCE                | 23        |
| H <sub>2</sub> TPP                | -1.46 | -1.08 |       |      |      | DMF         | SCE                | 15        |
| H <sub>2</sub> TPP                | -1.47 | -1.05 |       |      |      | DMSO        | SCE                | 11        |
| H <sub>2</sub> TPP                |       |       |       | 0.97 | 1.12 | PrCN        | SCE                | 9         |
| H <sub>2</sub> TPP                |       |       |       | 0.95 | 1.28 | DCM         | SSCE               | 30        |
| H <sub>2</sub> TPP                | -1.46 | -1.08 |       |      |      | DMF         | SCE                | 24        |
| H <sub>2</sub> TPP                | -2.01 | -1.69 |       | 0.53 | 0.87 | DCM         | Fc/Fc <sup>+</sup> | 31        |
| H <sub>2</sub> TPP                | -1.53 | -1.19 |       |      |      | DCM         | SCE                | 32        |
| H <sub>2</sub> TPP                | -2.09 | -1.74 |       | 0.53 |      | DCM         | Fc/Fc <sup>+</sup> | 33        |
| H <sub>2</sub> TPP                |       |       |       | 1.07 | 1.30 | DCM         | AgCl               | 17        |
| H <sub>2</sub> TPP                | -1.52 | -1.14 |       | 1.06 | 1.31 | PhCN        | SCE                | 28        |
| H <sub>2</sub> TPP                | -1.99 | -1.64 |       | 0.56 | 0.90 | DCM         | Fc/Fc <sup>+</sup> | This work |
| H-H <sub>2</sub> TPP <sup>a</sup> |       | -1.64 |       |      |      | DCM         | Fc/Fc <sup>+</sup> | This work |
| H-H <sub>2</sub> TPP <sup>b</sup> |       | -1.54 |       |      |      | DCM         | Fc/Fc <sup>+</sup> | This work |
| MgTPP                             | -1.80 | -1.35 |       |      |      | DMSO        | SCE                | 11        |
| MgTPP                             |       |       |       | 0.54 | 0.86 | PrCN        | SCE                | 9         |
| MgTPP                             |       |       |       | 0.13 | 0.43 | DCM         | Fc/Fc <sup>+</sup> | 2         |
| MgTPP                             |       |       |       | 0.60 |      | DCM         | SCE                | 34        |
| MgTPP                             |       | -1.57 |       | 0.65 | 0.94 | DCM         | SCE                | 35        |
| MgTPP                             |       |       |       | 0.21 |      | DCM         | Fc/Fc <sup>+</sup> | This work |
| Mn(III)TPPCl                      |       | -1.31 | -0.31 |      |      | DMSO        | SCE                | 36        |
| Mn(III)TPPCl                      |       | -1.60 | -0.23 | 1.14 | 1.50 | DCM         | SCE                | 37        |
| Mn(III)TPPCl                      | -1.76 | -1.32 | -0.22 |      |      | DMF         | SCE                | 15        |
| Mn(III)TPPCl                      |       | -1.60 | -0.29 | 1.18 | 1.58 | DCM         | SCE                | 38        |
| Mn(III)TPPCl                      | -1.81 | -1.31 | -0.18 |      |      | DMF         | SCE                | 39        |
| Mn(III)TPPCl                      | -1.76 | -1.26 | -0.24 |      |      | DMSO        | SCE                | 39        |
| Mn(III)TPPCl                      |       |       |       | 1.16 | 1.52 | DCM         | AgCl               | 17        |
| Mn(III)TPPCl                      | -1.79 | -1.47 | -0.21 | 1.28 | 1.64 | PhCN        | SCE                | 28        |
| O=Mo(IV)TPP                       | -1.31 | -0.96 |       |      |      | DCM         | SCE                | 19        |
| O=Mo(IV)TPP                       | -1.34 | -0.98 |       |      |      | DMSO        | SCE                | 19        |
| NiTPP                             |       |       | 1.10  | 1.04 |      | DCM         | SCE                | 13        |
| NiTPP                             |       |       | 1.00  | 1.10 | 1.40 | PhCN        | SCE                | 14        |
| NiTPP                             |       |       | 1.20  | 1.29 | 1.44 | DCM         | AgCl               | 40        |
| NiTPP                             | -1.75 | -1.18 |       |      |      | Benzene-DMF | SCE                | 11        |
| NiTPP                             |       |       |       | 0.95 |      | PrCN        | SCE                | 9         |
| NiTPP                             | -1.73 | -1.19 |       |      |      | DMF         | SCE                | 24        |
| NiTPP                             |       | -1.31 |       | 1.01 | 1.31 | DCM         | SCE                | 41        |
| NiTPP                             |       |       |       | 1.10 | 1.18 | DCM         | AgCl               | 17        |
| NiTPP                             |       | -1.82 |       | 0.49 | 0.78 | DCM         | Fc/Fc <sup>+</sup> | This work |

|                             |       |       |      |      |          |                    |           |
|-----------------------------|-------|-------|------|------|----------|--------------------|-----------|
| H-NiTPP <sup>a</sup>        | -1.76 |       |      |      | DCM      | Fc/Fc <sup>+</sup> | This work |
| H-NiTPP <sup>b</sup>        | -1.76 |       |      |      | DCM      | Fc/Fc <sup>+</sup> | This work |
| PbTPP                       | -1.52 | -1.10 |      |      | THF-DMSO | SCE                | 11        |
| PbTPP                       |       |       | 0.63 | 0.96 | PrCN     | SCE                | 9         |
| PdTPP                       |       | -1.34 | 1.2  | 1.61 | DCM      | SCE                | 23        |
| PdTPP                       | -1.64 | -1.18 |      |      | DMF      | SCE                | 24        |
| PdTPP                       | -1.80 | -1.34 | 1.14 | 1.55 | DCM      | SCE                | 42        |
| PdTPP                       |       | -1.81 | 0.65 |      | DCM      | Fc/Fc <sup>+</sup> | 43        |
| RuTPP(CO)                   |       |       | 0.82 | 1.21 | DCM      | SSCE               | 30        |
| Sn(IV)TPP(Oac) <sub>2</sub> | -1.26 | -0.81 |      |      | DMSO     | SCE                | 11        |
| O=Ti(IV)TPP                 | -1.43 | -1.04 | 1.2  | 1.42 | DCM      | SCE                | 44        |
| O=Ti(IV)TPP                 | -2.04 | -1.64 | 0.71 | 0.74 | DCM      | Fc/Fc <sup>+</sup> | This work |
| O=V(IV)TPP                  | -1.48 | -1.11 | 1.00 | 1.22 | DCM      | SCE                | 19        |
| O=V(IV)TPP                  | -1.32 | -0.94 |      |      | DMSO     | SCE                | 19        |
| O=V(IV)TPP                  | -1.45 | -1.00 |      |      | DMA      | SCE                | 19        |
| O=W(IV)TPP                  |       | -1.32 |      |      | DCM      | SCE                | 19        |
| O=W(IV)TPP                  |       | -1.16 |      |      | DMSO     | SCE                | 19        |
| ZnTPP                       |       |       | 0.80 |      | DCM      | SCE                | 13        |
| ZnTPP                       |       |       | 0.79 | 1.00 | PhCN     | SCE                | 14        |
| ZnTPP                       |       | -1.42 | 0.82 | 1.13 | DCM      | SCE                | 23        |
| ZnTPP                       | -1.73 | -1.32 |      |      | DMF      | SCE                | 45        |
| ZnTPP                       |       |       | 0.78 |      | DCM      | SCE                | 10        |
| ZnTPP                       | -1.72 | -1.31 |      |      | DMSO     | SCE                | 11        |
| ZnTPP                       |       |       | 0.71 | 1.03 | PrCN     | SCE                | 9         |
| ZnTPP                       |       | -1.83 | 0.30 |      | DCM      | Fc/Fc <sup>+</sup> | 2         |
| ZnTPP                       | -1.73 | -1.34 | 0.83 | 1.16 | PhCN     | SCE                | 7         |
| ZnTPP                       |       |       | 0.73 |      | DCM      | SCE                | 34        |
| ZnTPP                       |       |       | 0.82 | 1.12 | DCM      | AgCl               | 17        |
| ZnTPP                       |       | -1.85 | 0.36 | 0.66 | DCM      | Fc/Fc <sup>+</sup> | This work |
| H-ZnTPP <sup>a</sup>        | -1.80 |       |      |      | DCM      | Fc/Fc <sup>+</sup> | This work |
| H-ZnTPP <sup>b</sup>        | -1.77 |       |      |      | DCM      | Fc/Fc <sup>+</sup> | This work |

<sup>a</sup>Potential at the inflection point of the first cathodic wave involved in catalysis as measured by linear sweep voltammetry. <sup>b</sup>Average of inflection point potentials measured in the presence of between X and 22 equivalents of acid, where X is the number of equivalents where the cathodic peak potential stabilizes.

**Table S3.** Conversion between standard potentials of different reference electrodes used in this work.

| ↓ From/to →              | SCE                 | SSCE                | Ag/AgCl             |
|--------------------------|---------------------|---------------------|---------------------|
| <b>SHE</b>               | 0.244 <sup>46</sup> | 0.235 <sup>47</sup> | 0.209 <sup>48</sup> |
| <b>Fc/Fc<sup>+</sup></b> | -0.48 <sup>a</sup>  | -0.484 <sup>b</sup> | -0.515 <sup>b</sup> |

<sup>a</sup>Calculated from average difference between half-wave potentials of H<sub>2</sub>TPP measured against DCM in this work, and half-wave potentials measured against SCE in other works. <sup>b</sup>Calculated from the difference between the standard potential of the given reference electrode and SCE vs. SHE.



### 1.3 UV/Vis absorbance

Figure S7 shows the UV/vis absorbance spectrum of MgTPP, Al(III)TPPCL, O=Ti(IV)TPP, CoTPP, Co(III)TPPCL and AgTPP. All spectra were collected in DCM except the one for CoTPP, which was recorded in DMF.

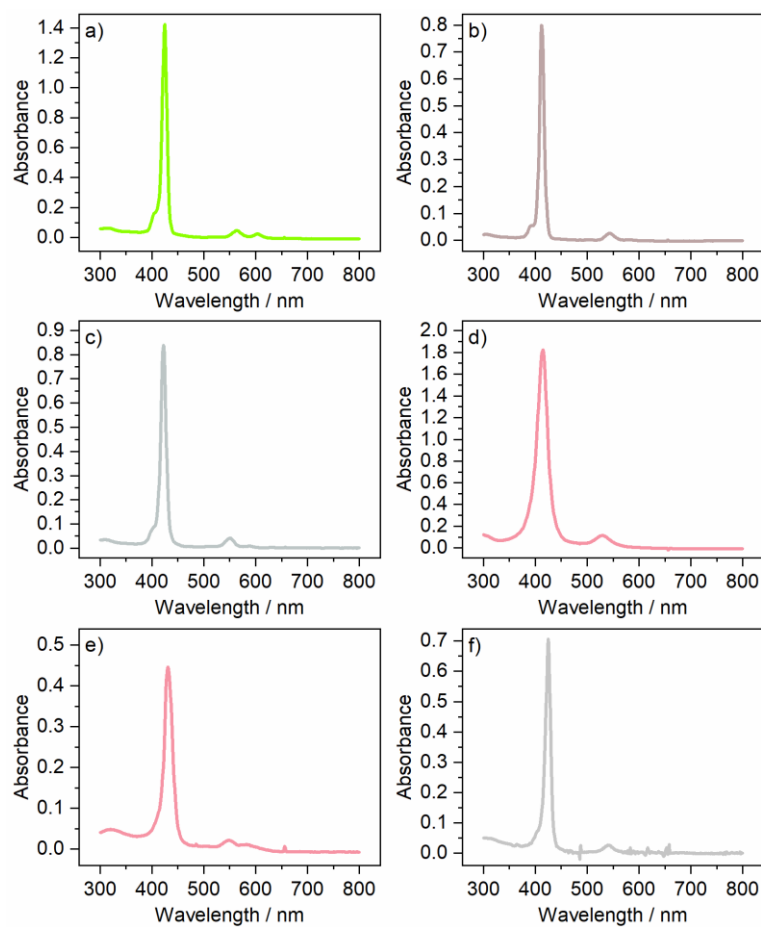

**Figure S7.** UV/vis of a) MgTPP, b) Al(III)TPPCL, c) O=Ti(IV)TPP, d) CoTPP in DMF, e) Co(III)TPPCL and f) AgTPP.

## 2 Computational study

### 2.1 Reaction scheme

Assuming that catalysis of the HER by tetraphenylporphyrins consists of two reductions and two protonations, the different possible reaction pathways can be described by Scheme S1.



CuTPP m2

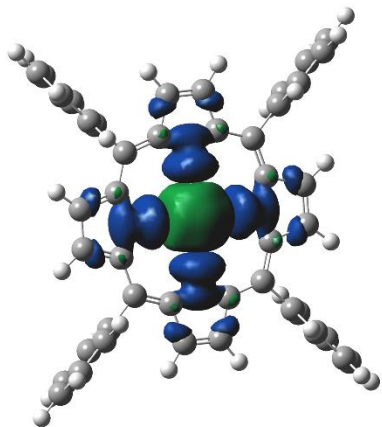

H-CuTPP m3

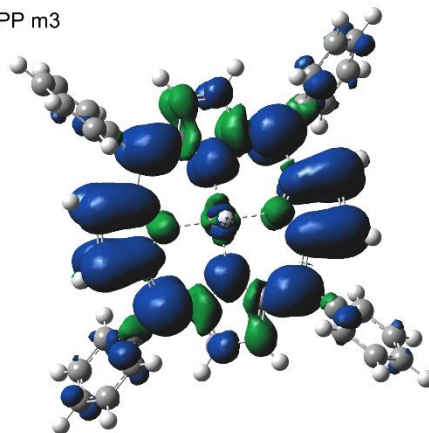

**Figure S8.** Spin density plots for CuTPP and H-CuTPP at isovalue 0.004.

CoTPP<sup>-</sup> m3

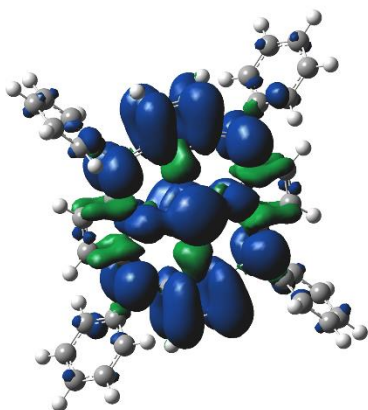

H-CoTPP<sup>-</sup> m2

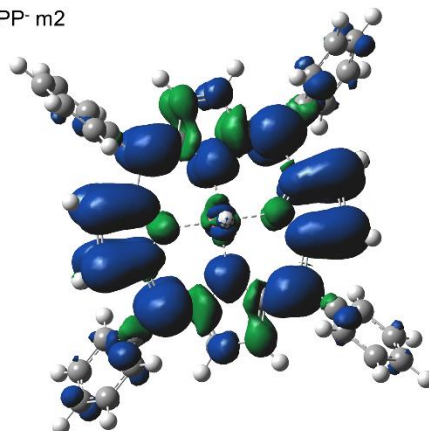

**Figure S9.** Spin density plots for CoTPP<sup>-</sup> and H-CoTPP<sup>-</sup> at isovalue 0.004.

FeTPP m2

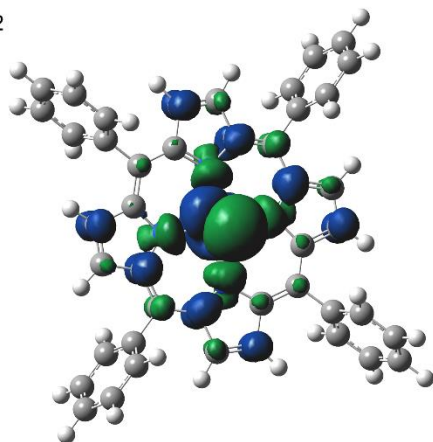

H-FeTPP m3

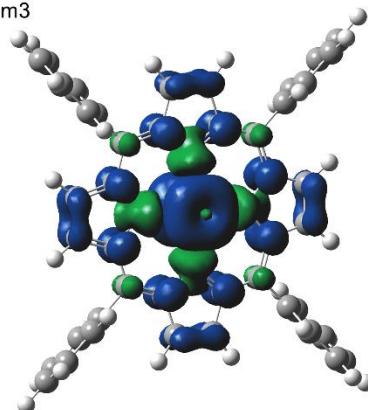

**Figure S10.** Spin density plots for FeTPP and H-FeTPP at isovalue 0.004.

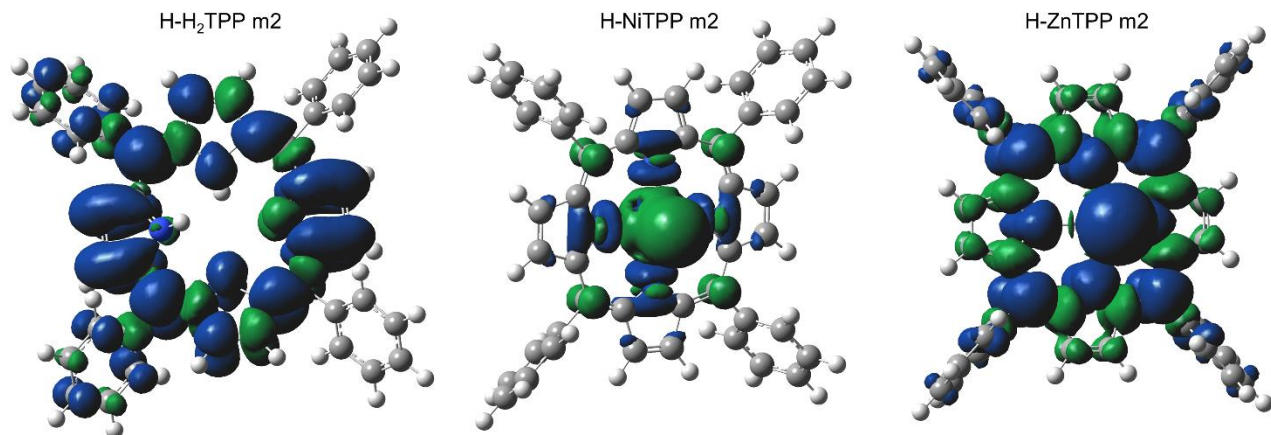

**Figure S11.** Spin density plots for H-H<sub>2</sub>TPP, H-NiTPP and H-ZnTPP at isovalue 0.004.

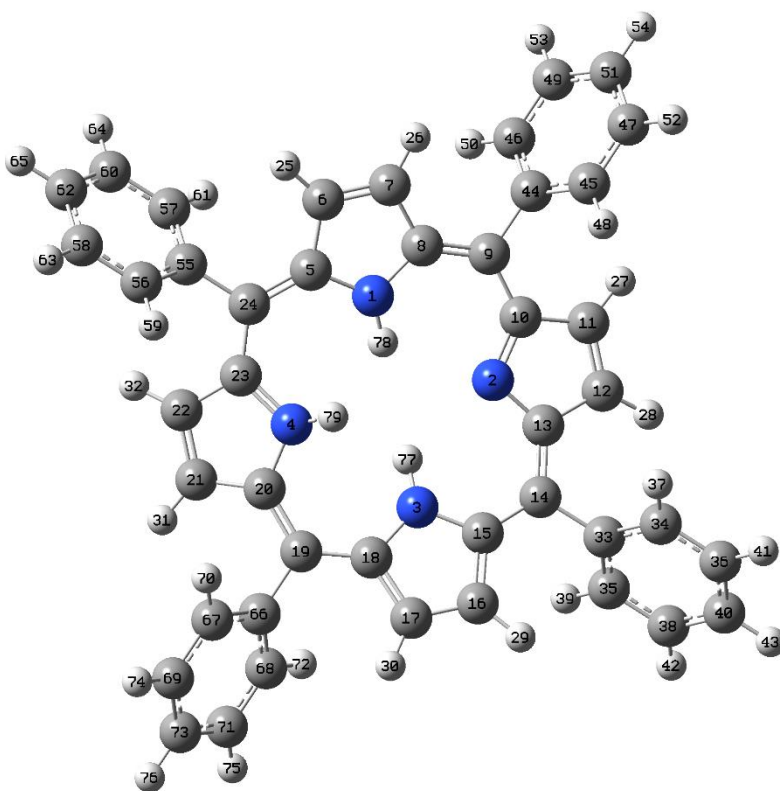

**Figure S12.** Atom numbering of H-H<sub>2</sub>TPP.

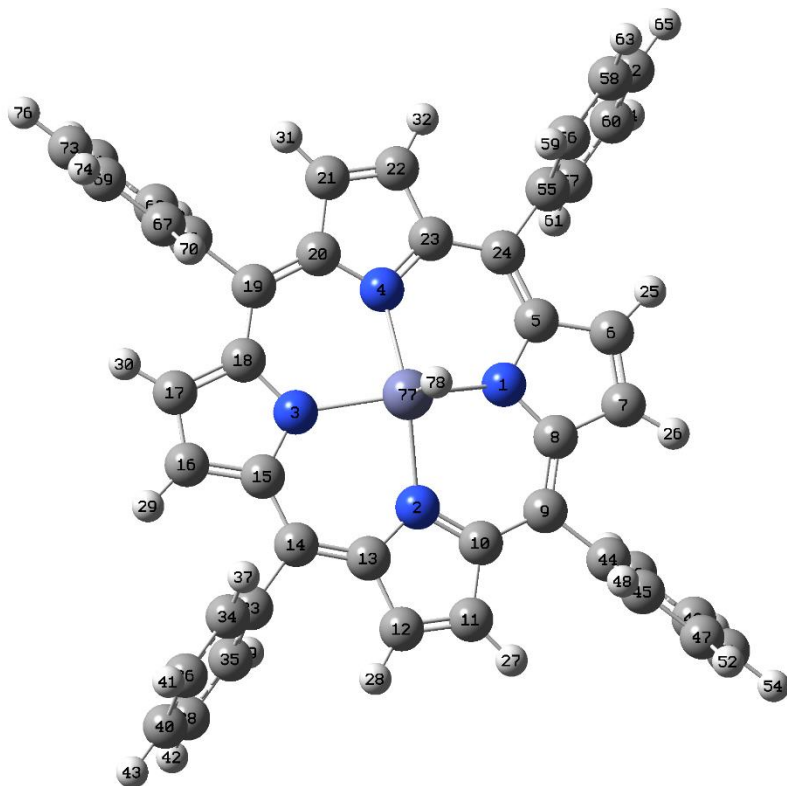

**Figure S13.** Atom numbering of H-ZnTPP.

**Table S4.** Mulliken spin densities for MTPP and H-MTPP. Values are obtained from the single point calculations described in the main text, for the multiplicities (mX) that the resulted in the electronic lowest energy.

| Atom | H-H <sub>2</sub> TPP<br>m2 | CoTPP<br>m3 | H-CoTPP<br>m2 | CuTPP<br>m2 | H-CuTPP<br>m3 | FeTPP<br>m3 | H-FeTPP<br>m2 | H-NiTPP<br>m2 | H-ZnTPP<br>m2 |
|------|----------------------------|-------------|---------------|-------------|---------------|-------------|---------------|---------------|---------------|
| 1N   | 6.03E-02                   | -3.90E-02   | 1.01E-01      | 1.12E-01    | 1.68E-01      | -6.71E-02   | -4.50E-02     | 4.93E-02      | 1.15E-01      |
| 2N   | -5.17E-02                  | 7.59E-02    | -1.28E-02     | 1.13E-01    | 1.60E-01      | -6.71E-02   | -4.03E-02     | 4.71E-02      | 1.13E-01      |
| 3N   | 6.03E-02                   | -3.90E-02   | 1.01E-01      | 1.12E-01    | 1.68E-01      | -6.71E-02   | -4.41E-02     | 4.93E-02      | 1.12E-01      |
| 4N   | -5.88E-03                  | 7.59E-02    | -1.15E-02     | 1.13E-01    | 1.58E-01      | -6.71E-02   | -3.60E-02     | 4.73E-02      | 1.13E-01      |
| 5C   | -4.20E-02                  | 5.57E-02    | 2.34E-03      | -2.79E-03   | -1.74E-02     | 1.43E-02    | 1.33E-02      | 9.27E-03      | -5.49E-02     |
| 6C   | 6.71E-02                   | 6.68E-02    | -1.64E-02     | -5.48E-03   | -1.64E-02     | 1.76E-02    | 9.60E-05      | 2.82E-03      | -1.56E-02     |
| 7C   | -4.61E-02                  | 6.68E-02    | 1.68E-02      | -5.48E-03   | -1.29E-02     | 1.76E-02    | 2.53E-02      | 1.80E-03      | -1.56E-02     |
| 8C   | 6.82E-02                   | 5.57E-02    | -2.74E-02     | -2.79E-03   | -1.81E-02     | 1.43E-02    | 3.31E-03      | 4.77E-03      | -5.49E-02     |
| 9C   | -2.63E-02                  | 8.69E-02    | 1.31E-01      | 1.13E-02    | 4.51E-02      | -1.49E-02   | -1.11E-02     | -1.45E-02     | 1.34E-01      |
| 10C  | 1.17E-01                   | -2.03E-02   | 4.36E-02      | -3.14E-03   | -1.73E-02     | 1.43E-02    | -2.78E-04     | 1.06E-02      | -3.74E-02     |
| 11C  | 4.92E-02                   | 4.89E-03    | 7.61E-02      | -5.84E-03   | -1.57E-02     | 1.74E-02    | 2.38E-02      | 3.51E-03      | -1.51E-02     |
| 12C  | 4.94E-02                   | 4.89E-03    | 5.34E-02      | -5.84E-03   | -1.21E-02     | 1.74E-02    | -1.58E-03     | 1.73E-03      | -1.11E-02     |
| 13C  | 1.17E-01                   | -2.03E-02   | 6.97E-02      | -3.14E-03   | -1.45E-02     | 1.43E-02    | 1.38E-02      | 6.86E-03      | -6.34E-02     |
| 14C  | -2.59E-02                  | 8.69E-02    | 6.46E-02      | 1.13E-02    | 4.65E-02      | -1.49E-02   | -2.09E-02     | -1.55E-02     | 1.45E-01      |
| 15C  | 6.80E-02                   | 5.57E-02    | 2.15E-03      | -2.79E-03   | -2.09E-02     | 1.43E-02    | 1.99E-02      | 8.37E-03      | -4.62E-02     |
| 16C  | -4.59E-02                  | 6.68E-02    | -1.79E-02     | -5.48E-03   | -1.29E-02     | 1.76E-02    | 1.84E-03      | 2.88E-03      | -9.30E-03     |
| 17C  | 6.68E-02                   | 6.68E-02    | 1.56E-02      | -5.48E-03   | -1.23E-02     | 1.76E-02    | 2.32E-02      | 1.28E-03      | -9.30E-03     |
| 18C  | -4.17E-02                  | 5.57E-02    | -3.22E-02     | -2.79E-03   | -1.17E-02     | 1.43E-02    | -4.44E-03     | 5.22E-03      | -4.62E-02     |
| 19C  | 1.66E-01                   | 8.69E-02    | 1.30E-01      | 1.13E-02    | 4.22E-02      | -1.49E-02   | -9.74E-03     | -1.66E-02     | 1.45E-01      |

|     |           |           |           |           |           |           |           |           |           |
|-----|-----------|-----------|-----------|-----------|-----------|-----------|-----------|-----------|-----------|
| 20C | 3.09E-02  | -2.03E-02 | 4.81E-02  | -3.14E-03 | -2.01E-02 | 1.43E-02  | -8.49E-03 | 1.00E-02  | -6.34E-02 |
| 21C | 7.54E-02  | 4.89E-03  | 7.45E-02  | -5.84E-03 | -1.51E-02 | 1.74E-02  | 2.09E-02  | 2.69E-03  | -1.11E-02 |
| 22C | 7.59E-02  | 4.88E-03  | 4.82E-02  | -5.84E-03 | -1.49E-02 | 1.74E-02  | -3.16E-04 | 2.17E-03  | -1.51E-02 |
| 23C | 3.06E-02  | -2.03E-02 | 7.55E-02  | -3.14E-03 | -1.04E-02 | 1.43E-02  | 1.87E-02  | 5.76E-03  | -3.74E-02 |
| 24C | 1.67E-01  | 8.69E-02  | 6.42E-02  | 1.13E-02  | 3.93E-02  | -1.49E-02 | -1.95E-02 | -1.54E-02 | 1.34E-01  |
| 25H | -2.81E-03 | -6.46E-03 | 1.68E-03  | 8.94E-04  | 1.04E-03  | -7.33E-04 | 1.49E-04  | 7.29E-04  | 6.03E-04  |
| 26H | 3.05E-03  | -6.46E-03 | 4.17E-04  | 8.94E-04  | 9.99E-04  | -7.33E-04 | -7.33E-04 | 7.40E-04  | 6.03E-04  |
| 27H | -4.28E-03 | 1.13E-03  | -6.98E-03 | 8.92E-04  | 9.28E-04  | -7.40E-04 | -7.79E-04 | 7.78E-04  | 4.84E-04  |
| 28H | -4.29E-03 | 1.13E-03  | -5.80E-03 | 8.92E-04  | 9.65E-04  | -7.40E-04 | 1.65E-04  | 7.21E-04  | 6.81E-04  |
| 29H | 3.03E-03  | -6.46E-03 | 1.75E-03  | 8.94E-04  | 1.15E-03  | -7.33E-04 | 1.21E-04  | 7.51E-04  | 7.74E-04  |
| 30H | -2.79E-03 | -6.46E-03 | 5.34E-04  | 8.94E-04  | 1.14E-03  | -7.33E-04 | -8.54E-04 | 7.27E-04  | 7.73E-04  |
| 31H | -5.38E-03 | 1.13E-03  | -6.83E-03 | 8.92E-04  | 8.35E-04  | -7.40E-04 | -8.23E-04 | 7.40E-04  | 6.81E-04  |
| 32H | -5.40E-03 | 1.13E-03  | -4.83E-03 | 8.92E-04  | 8.61E-04  | -7.40E-04 | 1.54E-04  | 7.46E-04  | 4.83E-04  |
| 33C | 1.14E-02  | -1.95E-03 | 1.03E-02  | -2.03E-03 | 1.24E-03  | -6.58E-03 | 2.56E-03  | -5.15E-04 | 5.51E-03  |
| 34C | -1.09E-02 | -1.33E-02 | 1.59E-02  | -1.85E-04 | -1.73E-03 | 1.48E-03  | -3.18E-04 | 2.62E-04  | 4.00E-05  |
| 35C | 7.93E-04  | 1.88E-02  | -1.69E-02 | -5.30E-05 | -1.20E-03 | 1.93E-03  | 3.74E-04  | 9.10E-05  | 3.95E-03  |
| 36C | 1.06E-03  | 3.14E-03  | -3.74E-03 | 2.90E-05  | 4.35E-04  | 1.33E-04  | -1.17E-04 | -6.90E-04 | 8.79E-04  |
| 37H | 1.02E-03  | 2.29E-04  | -9.60E-04 | -8.00E-06 | -4.10E-04 | -3.30E-05 | 1.24E-04  | 2.05E-04  | -1.22E-03 |
| 38C | 7.04E-04  | -5.10E-03 | 3.44E-03  | 4.60E-05  | -3.49E-04 | 2.43E-04  | 1.81E-04  | 9.30E-05  | -1.33E-03 |
| 39H | -3.26E-04 | -3.32E-04 | 4.04E-04  | -1.30E-05 | -1.60E-04 | -1.20E-05 | -7.00E-06 | 6.50E-05  | -9.10E-04 |
| 40C | 1.79E-04  | 7.13E-03  | 5.57E-03  | -5.70E-05 | 6.91E-04  | 6.10E-05  | -2.41E-04 | -4.36E-04 | 6.25E-03  |
| 41H | -6.40E-05 | 1.94E-04  | -8.80E-05 | 2.00E-06  | 6.10E-05  | -3.00E-05 | -6.00E-06 | -1.40E-05 | 3.18E-04  |
| 42H | -1.70E-04 | -5.20E-05 | 1.25E-04  | 3.00E-06  | 5.60E-05  | -3.70E-05 | -3.00E-06 | -2.40E-05 | 3.13E-04  |
| 43H | -4.10E-05 | -3.28E-04 | -3.29E-04 | 6.00E-06  | -5.10E-05 | 8.00E-06  | 1.50E-05  | 2.20E-05  | -3.74E-04 |
| 44C | 1.15E-02  | -1.95E-03 | -1.17E-02 | -2.03E-03 | 2.60E-03  | -6.58E-03 | -5.66E-03 | -6.23E-04 | 1.10E-02  |
| 45C | -1.09E-02 | 1.88E-02  | 2.55E-02  | -5.30E-05 | -2.89E-03 | 1.93E-03  | 1.90E-03  | 3.26E-04  | -2.53E-03 |
| 46C | 7.46E-04  | -1.33E-02 | -1.12E-02 | -1.85E-04 | -1.69E-03 | 1.48E-03  | 2.05E-03  | -1.84E-04 | 3.50E-03  |
| 47C | 1.08E-03  | -5.10E-03 | -8.75E-03 | 4.60E-05  | 6.13E-04  | 2.43E-04  | 1.48E-04  | -6.80E-04 | 1.43E-03  |
| 48H | 1.03E-03  | -3.32E-04 | -5.49E-04 | -1.30E-05 | -5.62E-04 | -1.20E-05 | 2.65E-04  | 2.08E-04  | -1.49E-03 |
| 49C | 7.26E-04  | 3.14E-03  | 7.63E-04  | 2.90E-05  | -1.63E-04 | 1.33E-04  | -7.00E-06 | 1.30E-04  | -8.84E-04 |
| 50H | -3.23E-04 | 2.29E-04  | 1.89E-04  | -8.00E-06 | -1.37E-04 | -3.30E-05 | 5.80E-05  | 8.10E-05  | -8.65E-04 |
| 51C | 1.52E-04  | 7.13E-03  | 1.14E-02  | -5.70E-05 | 3.97E-04  | 6.10E-05  | 6.20E-05  | -6.09E-04 | 6.10E-03  |
| 52H | -6.50E-05 | -5.20E-05 | 1.43E-04  | 3.00E-06  | 5.60E-05  | -3.70E-05 | -2.30E-05 | -1.50E-05 | 3.14E-04  |
| 53H | -1.72E-04 | 1.94E-04  | 2.09E-04  | 2.00E-06  | 5.30E-05  | -3.00E-05 | -3.50E-05 | -2.80E-05 | 3.21E-04  |
| 54H | -3.90E-05 | -3.28E-04 | -6.68E-04 | 6.00E-06  | -3.20E-05 | 8.00E-06  | 2.00E-06  | 3.20E-05  | -3.72E-04 |
| 55C | -1.82E-02 | -1.94E-03 | 3.70E-03  | -2.03E-03 | 3.21E-03  | -6.58E-03 | 2.48E-03  | -4.02E-04 | 1.10E-02  |
| 56C | 1.42E-02  | 1.88E-02  | -1.54E-02 | -5.30E-05 | -2.67E-03 | 1.93E-03  | -3.62E-04 | 2.35E-04  | -2.53E-03 |
| 57C | 2.41E-02  | -1.33E-02 | 1.08E-02  | -1.85E-04 | -1.34E-03 | 1.48E-03  | 3.24E-04  | -2.66E-04 | 3.50E-03  |
| 58C | -1.15E-02 | -5.10E-03 | 4.28E-03  | 4.60E-05  | 5.77E-04  | 2.44E-04  | -1.59E-04 | -6.23E-04 | 1.44E-03  |
| 59H | -2.24E-04 | -3.32E-04 | -6.60E-05 | -1.30E-05 | -5.94E-04 | -1.10E-05 | 1.38E-04  | 1.95E-04  | -1.49E-03 |
| 60C | -1.34E-02 | 3.14E-03  | -3.33E-03 | 2.90E-05  | -3.16E-04 | 1.33E-04  | 1.38E-04  | 1.61E-04  | -8.82E-04 |
| 61H | -1.93E-03 | 2.29E-04  | 1.00E-06  | -8.00E-06 | -1.49E-04 | -3.30E-05 | -1.60E-05 | 8.90E-05  | -8.65E-04 |
| 62C | 2.02E-02  | 7.13E-03  | 3.82E-03  | -5.70E-05 | 6.02E-04  | 6.10E-05  | -2.29E-04 | -6.86E-04 | 6.10E-03  |
| 63H | 5.47E-04  | -5.20E-05 | -3.20E-05 | 3.00E-06  | 6.70E-05  | -3.70E-05 | -5.00E-06 | -1.90E-05 | 3.14E-04  |
| 64H | 7.00E-04  | 1.94E-04  | -1.81E-04 | 2.00E-06  | 5.80E-05  | -3.00E-05 | -1.00E-06 | -2.80E-05 | 3.21E-04  |
| 65H | -1.38E-03 | -3.28E-04 | -5.70E-05 | 6.00E-06  | -4.90E-05 | 8.00E-06  | 1.40E-05  | 3.60E-05  | -3.72E-04 |
| 66C | -1.81E-02 | -1.94E-03 | -8.93E-03 | -2.03E-03 | 2.38E-03  | -6.58E-03 | -7.25E-03 | -5.00E-06 | 5.52E-03  |
| 67C | 1.41E-02  | -1.33E-02 | 2.30E-02  | -1.85E-04 | -2.34E-03 | 1.48E-03  | 1.44E-03  | -1.10E-04 | 3.70E-05  |
| 68C | 2.40E-02  | 1.88E-02  | -9.98E-03 | -5.30E-05 | -1.11E-03 | 1.93E-03  | 2.59E-03  | -2.80E-05 | 3.95E-03  |
| 69C | -1.14E-02 | 3.14E-03  | -8.60E-03 | 2.90E-05  | 5.33E-04  | 1.33E-04  | -7.20E-05 | 1.45E-04  | 8.80E-04  |
| 70H | -2.20E-04 | 2.29E-04  | -7.86E-04 | -8.00E-06 | -5.36E-04 | -3.30E-05 | 3.20E-05  | 8.10E-05  | -1.22E-03 |
| 71C | -1.33E-02 | -5.10E-03 | 5.01E-04  | 4.60E-05  | -3.40E-04 | 2.44E-04  | 5.50E-04  | -6.39E-04 | -1.33E-03 |
| 72H | -1.92E-03 | -3.32E-04 | 8.00E-05  | -1.30E-05 | -1.75E-04 | -1.10E-05 | 1.78E-04  | 1.68E-04  | -9.10E-04 |
| 73C | 2.02E-02  | 7.13E-03  | 1.08E-02  | -5.70E-05 | 7.23E-04  | 6.10E-05  | 1.13E-04  | -6.21E-04 | 6.25E-03  |
| 74H | 5.44E-04  | 1.94E-04  | 2.95E-04  | 2.00E-06  | 6.80E-05  | -3.00E-05 | -1.50E-05 | -2.70E-05 | 3.18E-04  |
| 75H | 6.96E-04  | -5.20E-05 | 2.27E-04  | 3.00E-06  | 5.80E-05  | -3.70E-05 | -3.80E-05 | -1.70E-05 | 3.13E-04  |

|      |           |           |           |          |           |          |           |           |           |
|------|-----------|-----------|-----------|----------|-----------|----------|-----------|-----------|-----------|
| 76H  | -1.37E-03 | -3.28E-04 | -6.91E-04 | 6.00E-06 | -5.50E-05 | 8.00E-06 | 2.00E-06  | 3.20E-05  | -3.74E-04 |
| 77Zn | 7.25E-04  | 1.14E+00  | -1.06E-02 | 5.76E-01 | 7.02E-01  | 2.09E+00 | 1.20E+00  | 9.45E-01  | 1.42E-01  |
| 78H  | 7.24E-04  | -         | 3.26E-03  | -        | 7.10E-01  | -        | -1.23E-01 | -1.57E-01 | 2.87E-01  |
| 79H  | 1.06E-04  | -         | -         | -        | -         | -        | -         | -         | -         |

**Table S5.** HOMO and LUMO of H-MTPP and MTPP, for the multiplicities (mX) resulting in the lowest electronic energy.

| Compound                | HOMO    | LUMO    |
|-------------------------|---------|---------|
| H <sub>2</sub> TPP m1   | -5.2801 | -2.5815 |
| H-H <sub>2</sub> TPP m2 | -3.8227 | -2.6368 |
| FeTPP m3                | -5.3457 | -2.4607 |
| H-FeTPP m2              | -5.4230 | -2.4697 |
| CoTPP <sup>-</sup> m3   | -0.4912 | 0.5418  |
| H-CoTPP <sup>-</sup> m2 | -0.5113 | 0.5222  |
| NiTPP m1                | -5.3721 | -2.4458 |
| H-NiTPP m2              | -5.4586 | -2.7601 |
| CuTPP m2                | -5.3685 | -2.4964 |
| H-CuTPP m3              | -5.2744 | -2.5560 |
| ZnTPP m1                | -5.3269 | -2.5119 |
| H-ZnTPP m2              | -5.3734 | -2.6512 |

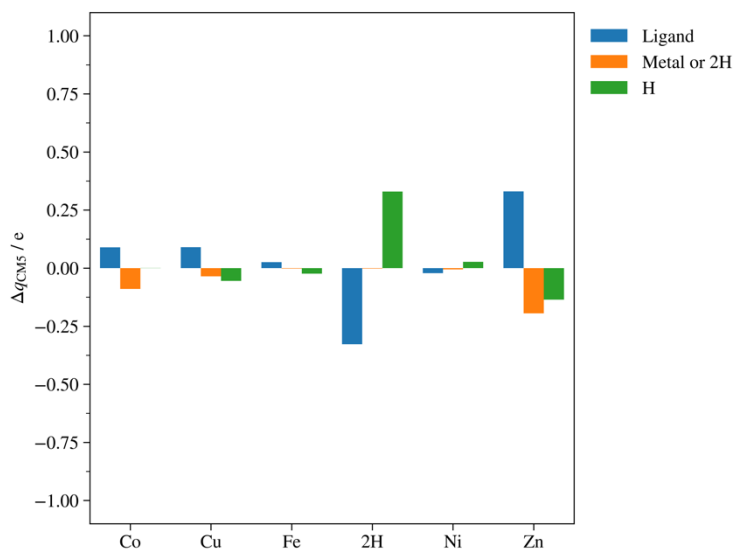

**Figure S14.** Change in CM5 charge on the ligand and on the metal between H-MTPP and MTPP. The charge on H in H-MTPP is also shown. For H-CoTPP and CoTPP, the total charge is set to -1.

Energies and energy correction **Fel! Hittar inte referensskälla.** Figure S15 shows half-wave potentials of the first oxidation (M(III)/M(II) or  $L^{1+}/L^0$ ) as a function of the difference in free energy between  $MTPP^0$  and  $MTPP^+$ . Table S6 shows the total charge ( $q$ ), the multiplicity ( $M$ ), the total energy ( $\epsilon_{opt}$ ) and dispersion correction ( $\epsilon_{d,opt}$ ) resulting from geometry optimization dispersion, the total energy ( $\epsilon_{freq}$ ) and dispersion correction ( $\epsilon_{d,freq}$ ) resulting from frequency calculations, the zero point correction, ( $\epsilon_{ZPE}$ ), the correction to the internal energy ( $\epsilon_{int}$ ), the correction to the enthalpy ( $H_{corr}$ ), the correction to Gibbs free energy ( $G_{corr}$ ), the entropy ( $S$ ), and the total energy resulting from single point calculations ( $\epsilon_{sp}$ ) for all compounds used in the computational study. The entropy was obtained from  $S = (H_{corr} - G_{corr})/T$ , where  $T = 298.15$  K.

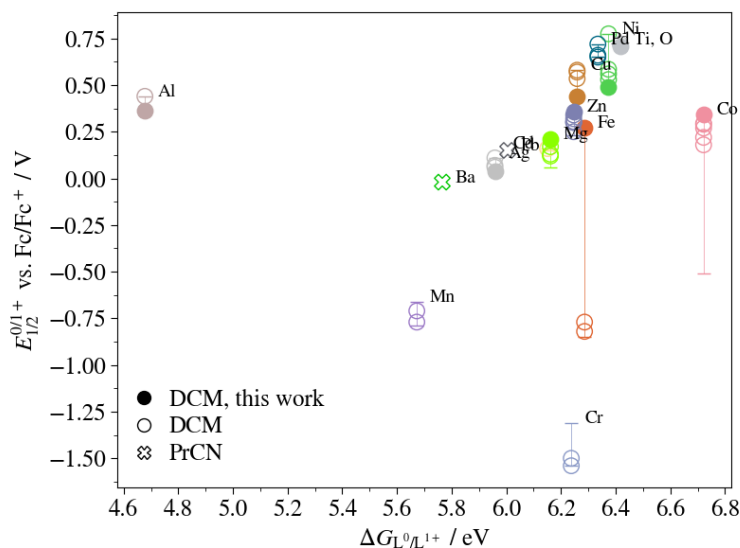

**Figure S15.** Half-wave potential of the first oxidation (M(III)/M(II) for Al, Ag, Co, Cr, and Fe,  $L^{1+}/L^0$  for all other compounds shown here) as a function of the difference in free energy between  $MTPP^0$  and  $MTPP^+$ . Filled markers indicate values obtained experimentally in this study, open markers indicate values obtained from literature and the bars represent all literature values obtained in solvents other than DCM.



**Table S6.** Energies and energy corrections resulting from geometry optimizations, frequency calculations and single point calculations. For compounds marked NC (not-converged), one or more calculations did not converge after several attempts, and the results were left out.

| Name               | <i>q</i> | <i>M</i> | $\epsilon_{\text{opt}}$ | $\epsilon_{\text{d,opt}}$ | $\epsilon_{\text{freq}}$ | $\epsilon_{\text{d,freq}}$ | $\epsilon_{\text{ZPE}}$ | $\epsilon_{\text{int}}$ | $H_{\text{corr}}$ | $G_{\text{corr}}$ | <i>S</i>  | $\epsilon_{\text{sp}}$ |
|--------------------|----------|----------|-------------------------|---------------------------|--------------------------|----------------------------|-------------------------|-------------------------|-------------------|-------------------|-----------|------------------------|
| AgTPP              | -1       | 1        | -2 059.70571            | -0.09826                  | -2 059.70574             | -0.09824                   | 0.59105                 | 0.62878                 | 0.62972           | 0.51911           | 3.710E-04 | -2 060.12945           |
| AgTPP              | -1       | 3        | -2 059.70288            | -0.09791                  | -2 059.70289             | -0.09792                   | 0.59127                 | 0.62888                 | 0.62982           | 0.51831           | 3.740E-04 | -2 060.12771           |
| AgTPP              | -1       | 5        | -2 059.64945            | -0.09793                  | -2 059.64945             | -0.09793                   | 0.58938                 | 0.62726                 | 0.62820           | 0.51565           | 3.775E-04 | -2 060.07365           |
| AgTPP              | 0        | 2        | -2 059.64574            | -0.09769                  | -2 059.64574             | -0.09769                   | 0.59522                 | 0.63256                 | 0.63350           | 0.52251           | 3.723E-04 | -2 060.06610           |
| AgTPP              | 0        | 4        | -2 059.58820            | -0.09794                  | -2 059.58820             | -0.09794                   | 0.59197                 | 0.62960                 | 0.63055           | 0.51873           | 3.750E-04 | -2 060.01108           |
| AgTPP              | 0        | 6        | -2 059.51846            | -0.09781                  | -2 059.51846             | -0.09781                   | 0.59007                 | 0.62810                 | 0.62904           | 0.51561           | 3.805E-04 | -2 059.94125           |
| AgTPP              | 1        | 1        | -2 059.43136            | -0.09864                  | -2 059.43136             | -0.09864                   | 0.59765                 | 0.63426                 | 0.63520           | 0.52804           | 3.594E-04 | -2 059.85195           |
| AgTPP              | 1        | 3        | -2 059.41718            | -0.09816                  | -2 059.41718             | -0.09816                   | 0.59544                 | 0.63258                 | 0.63353           | 0.52355           | 3.689E-04 | -2 059.83821           |
| AgTPP              | 1        | 5        | -2 059.34770            | -0.09802                  | -2 059.34770             | -0.09802                   | 0.59190                 | 0.62971                 | 0.63065           | 0.51819           | 3.772E-04 | -2 059.76901           |
| AlTPP              | 0        | 2        | -2 155.19247            | -0.09286                  | -2 155.19247             | -0.09286                   | 0.59760                 | 0.63398                 | 0.63493           | 0.52606           | 3.651E-04 | -2 155.60153           |
| AlTPP              | 1        | 1        | -2 155.02256            | -0.09236                  | -2 155.02256             | -0.09236                   | 0.60003                 | 0.63559                 | 0.63653           | 0.52756           | 3.655E-04 | -2 155.43042           |
| BaTPP              | 0        | 1        | -1 938.20749            | -0.09411                  | -1 938.20748             | -0.09411                   | 0.59272                 | 0.63064                 | 0.63159           | 0.51907           | 3.774E-04 | -1 938.62098           |
| BaTPP              | 0        | 3        | -1 938.15652            | -0.09469                  | -1 938.15652             | -0.09469                   | 0.59045                 | 0.62840                 | 0.62935           | 0.51667           | 3.779E-04 | -1 938.56899           |
| BaTPP              | 0        | 5        | -1 938.08828            | -0.09474                  | -1 938.08828             | -0.09474                   | 0.58827                 | 0.62654                 | 0.62748           | 0.51362           | 3.819E-04 | -1 938.50064           |
| BaTPP              | 1        | 2        | -1 937.99435            | -0.09478                  | -1 937.99705             | -0.09516                   | 0.59387                 | 0.63139                 | 0.63233           | 0.52158           | 3.715E-04 | -1 938.40554           |
| BaTPP              | 1        | 4        | -1 937.93077            | -0.09500                  | -1 937.93077             | -0.09500                   | 0.59089                 | 0.62901                 | 0.62996           | 0.51673           | 3.797E-04 | -1 938.34202           |
| BaTPP              | 1        | 6        | -1 937.83567            | -0.09514                  | -1 937.83567             | -0.09514                   | 0.58677                 | 0.62545                 | 0.62639           | 0.51153           | 3.852E-04 | -1 938.24633           |
| CdTPP              | 0        | 1        | -2 080.44116            | -0.09747                  | -2 080.44116             | -0.09747                   | 0.59406                 | 0.63167                 | 0.63261           | 0.52131           | 3.733E-04 | -2 080.86744           |
| CdTPP              | 0        | 3        | -2 080.39081            | -0.09811                  | -2 080.39081             | -0.09811                   | 0.59233                 | 0.62982                 | 0.63077           | 0.51995           | 3.717E-04 | -2 080.81654           |
| CdTPP              | 0        | 5        | -2 080.32190            | -0.09805                  | -2 080.32190             | -0.09805                   | 0.58989                 | 0.62778                 | 0.62872           | 0.51633           | 3.770E-04 | -2 080.74752           |
| CdTPP              | 1        | 2        | -2 080.21414            | -0.09794                  | -2 080.21420             | -0.09794                   | 0.59418                 | 0.63176                 | 0.63270           | 0.52088           | 3.751E-04 | -2 080.63822           |
| CdTPP              | 1        | 4        | -2 080.15156            | -0.09812                  | -2 080.15156             | -0.09812                   | 0.59216                 | 0.62984                 | 0.63078           | 0.51908           | 3.747E-04 | -2 080.57577           |
| CdTPP              | 1        | 6        | -2 080.05247            | -0.09799                  | -2 080.05668             | -0.09808                   | 0.58804                 | 0.62639                 | 0.62733           | 0.51373           | 3.810E-04 | -2 080.47654           |
| CoTPP              | -1       | 1        | -2 058.62158            | -0.09502                  | -2 058.63653             | -0.09511                   | 0.59431                 | 0.63144                 | 0.63239           | 0.52193           | 3.705E-04 | -3 295.99441           |
| CoTPP              | -1       | 3        | -2 058.63485            | -0.09513                  | -2 058.63485             | -0.09513                   | 0.59373                 | 0.63091                 | 0.63186           | 0.51984           | 3.757E-04 | -3 296.00229           |
| CoTPP              | -1       | 5        | -2 058.63210            | -0.09513                  | -2 058.63210             | -0.09513                   | 0.59219                 | 0.62965                 | 0.63059           | 0.51900           | 3.743E-04 | -3 295.99301           |
| CoTPP              | 0        | 2        | -2 058.58386            | -0.09488                  | -2 058.58386             | -0.09488                   | 0.59782                 | 0.63472                 | 0.63567           | 0.52356           | 3.760E-04 | -3 295.94981           |
| CoTPP              | 0        | 4        | -2 058.51969            | -0.09515                  | -2 058.51969             | -0.09515                   | 0.59387                 | 0.63108                 | 0.63202           | 0.52045           | 3.742E-04 | -3 295.88476           |
| CoTPP              | 0        | 6        | -2 058.51860            | -0.09521                  | -2 058.51860             | -0.09521                   | 0.59288                 | 0.63041                 | 0.63136           | 0.51905           | 3.767E-04 | -3 295.87739           |
| CoTPP NC           | 1        | 1        |                         |                           |                          |                            |                         |                         |                   |                   |           |                        |
| CoTPP              | 1        | 3        | -2 058.34056            | -0.09478                  | -2 058.34056             | -0.09478                   | 0.59834                 | 0.63468                 | 0.63563           | 0.52718           | 3.637E-04 | -3 295.70337           |
| CoTPP              | 1        | 5        | -2 058.28500            | -0.09481                  | -2 058.28500             | -0.09481                   | 0.59520                 | 0.63203                 | 0.63298           | 0.52367           | 3.666E-04 | -3 295.66977           |
| CrTPP NC           | 0        | 1        |                         |                           |                          |                            |                         |                         |                   |                   |           |                        |
| CrTPP              | 0        | 3        | -1 999.73096            | -0.09388                  | -1 999.73096             | -0.09388                   | 0.59674                 | 0.63363                 | 0.63457           | 0.52395           | 3.710E-04 | -2 957.61580           |
| CrTPP              | 0        | 5        | -1 999.77254            | -0.09387                  | -1 999.77254             | -0.09387                   | 0.59673                 | 0.63359                 | 0.63453           | 0.52365           | 3.719E-04 | -2 957.65831           |
| CrTPP              | 1        | 2        | -1 999.50194            | -0.09436                  | -1 999.50194             | -0.09436                   | 0.59654                 | 0.63330                 | 0.63424           | 0.52525           | 3.656E-04 | -2 957.36785           |
| CrTPP              | 1        | 4        | -1 999.54377            | -0.09435                  | -1 999.54377             | -0.09435                   | 0.59646                 | 0.63324                 | 0.63418           | 0.52458           | 3.676E-04 | -2 957.42700           |
| CrTPP              | 1        | 6        | -1 999.54306            | -0.09436                  | -1 999.54306             | -0.09436                   | 0.59668                 | 0.63342                 | 0.63437           | 0.52464           | 3.680E-04 | -2 957.42632           |
| CuTPP              | 0        | 2        | -2 110.05438            | -0.09658                  | -2 110.05438             | -0.09658                   | 0.59671                 | 0.63389                 | 0.63484           | 0.52337           | 3.739E-04 | -3 553.66374           |
| CuTPP              | 0        | 4        | -2 109.99348            | -0.09686                  | -2 109.99348             | -0.09686                   | 0.59326                 | 0.63074                 | 0.63169           | 0.51954           | 3.762E-04 | -3 553.60236           |
| CuTPP              | 0        | 6        | -2 109.92429            | -0.09676                  | -2 109.92429             | -0.09676                   | 0.59163                 | 0.62951                 | 0.63046           | 0.51638           | 3.826E-04 | -3 553.53303           |
| CuTPP              | 1        | 1        | -2 109.81133            | -0.09770                  | -2 109.82612             | -0.09746                   | 0.59720                 | 0.63400                 | 0.63495           | 0.52665           | 3.632E-04 | -3 553.42054           |
| CuTPP              | 1        | 3        | -2 109.82460            | -0.09707                  | -2 109.82460             | -0.09707                   | 0.59661                 | 0.63364                 | 0.63459           | 0.52410           | 3.706E-04 | -3 553.43153           |
| CuTPP              | 1        | 5        | -2 109.75586            | -0.09693                  | -2 109.75586             | -0.09693                   | 0.59364                 | 0.63127                 | 0.63221           | 0.51926           | 3.788E-04 | -3 553.36305           |
| FeTPP              | -1       | 2        | -2 036.72129            | -0.09607                  | -2 036.72129             | -0.09607                   | 0.59417                 | 0.63123                 | 0.63217           | 0.52166           | 3.707E-04 | -3 176.93760           |
| FeTPP              | -1       | 4        | -2 036.71562            | -0.09612                  | -2 036.71562             | -0.09612                   | 0.59356                 | 0.63072                 | 0.63166           | 0.52036           | 3.733E-04 | -3 176.93522           |
| FeTPP              | -1       | 6        | -2 036.71434            | -0.09606                  | -2 036.71434             | -0.09606                   | 0.59175                 | 0.62929                 | 0.63023           | 0.51834           | 3.753E-04 | -3 176.91406           |
| FeTPP              | 0        | 1        | -2 036.60881            | -0.09602                  | -2 036.64389             | -0.09603                   | 0.59774                 | 0.63447                 | 0.63541           | 0.52619           | 3.663E-04 | -3 176.82720           |
| FeTPP              | 0        | 3        | -2 036.66313            | -0.09585                  | -2 036.66312             | -0.09585                   | 0.59753                 | 0.63444                 | 0.63538           | 0.52382           | 3.742E-04 | -3 176.88120           |
| FeTPP              | 0        | 5        | -2 036.65309            | -0.09588                  | -2 036.65879             | -0.09588                   | 0.59565                 | 0.63292                 | 0.63387           | 0.52217           | 3.746E-04 | -3 176.81085           |
| FeTPP              | 1        | 2        | -2 036.43295            | -0.09634                  | -2 036.43295             | -0.09634                   | 0.59738                 | 0.63415                 | 0.63510           | 0.52516           | 3.687E-04 | -3 176.64844           |
| FeTPP              | 1        | 4        | -2 036.43089            | -0.09589                  | -2 036.43089             | -0.09589                   | 0.59790                 | 0.63409                 | 0.63503           | 0.52429           | 3.714E-04 | -3 176.65101           |
| FeTPP              | 1        | 6        | -2 036.43033            | -0.09635                  | -2 036.43033             | -0.09635                   | 0.59570                 | 0.63291                 | 0.63385           | 0.52286           | 3.723E-04 | -3 176.64159           |
| H <sub>2</sub> TPP | 0        | 1        | -1 913.82681            | -0.09151                  | -1 913.82681             | -0.09151                   | 0.61839                 | 0.65490                 | 0.65584           | 0.54674           | 3.659E-04 | -1 914.21574           |
| H <sub>2</sub> TPP | 1        | 2        | -1 913.59938            | -0.09197                  | -1 913.59938             | -0.09197                   | 0.61867                 | 0.65503                 | 0.65597           | 0.54716           | 3.650E-04 | -1 913.98595           |
| MgTPP              | 0        | 1        | -2 112.86290            | -0.09348                  | -2 112.86290             | -0.09348                   | 0.59673                 | 0.63343                 | 0.63437           | 0.52583           | 3.641E-04 | -2 113.26693           |
| MgTPP              | 1        | 2        | -2 112.63642            | -0.09398                  | -2 112.63642             | -0.09398                   | 0.59683                 | 0.63341                 | 0.63436           | 0.52628           | 3.625E-04 | -2 113.03813           |
| MnTPP              | 0        | 2        | -2 017.06677            | -0.09558                  | -2 017.06677             | -0.09558                   | 0.59715                 | 0.63400                 | 0.63495           | 0.52455           | 3.703E-04 | -3 064.13066           |
| MnTPP              | 0        | 4        | -2 017.09233            | -0.09558                  | -2 017.09233             | -0.09558                   | 0.59708                 | 0.63395                 | 0.63489           | 0.52387           | 3.724E-04 | -3 064.15888           |
| MnTPP              | 0        | 6        | -2 017.10390            | -0.09553                  | -2 017.10390             | -0.09553                   | 0.59497                 | 0.63234                 | 0.63328           | 0.52139           | 3.753E-04 | -3 064.16408           |
| MnTPP              | 1        | 1        | -2 016.79507            | -0.09564                  | -2 016.83534             | -0.09565                   | 0.59765                 | 0.63380                 | 0.63474           | 0.52702           | 3.613E-04 | -3 063.86374           |
| MnTPP              | 1        | 3        | -2 016.86372            | -0.09606                  | -2 016.86372             | -0.09606                   | 0.59701                 | 0.63376                 | 0.63470           | 0.52519           | 3.673E-04 | -3 063.92290           |
| MnTPP              | 1        | 5        | -2 016.89993            | -0.09566                  | -2 016.89993             | -0.09566                   | 0.59783                 | 0.63397                 | 0.63492           | 0.52602           | 3.653E-04 | -3 063.96624           |

|             |    |   |              |          |              |          |         |         |         |         |            |              |
|-------------|----|---|--------------|----------|--------------|----------|---------|---------|---------|---------|------------|--------------|
| NiTPP       | 0  | 1 | -2.083.68021 | -0.09629 | -2.083.68021 | -0.09629 | 0.59811 | 0.63488 | 0.63582 | 0.52596 | 3.685E-04  | -3.421.50232 |
| NiTPP       | 0  | 3 | -2.083.67257 | -0.09640 | -2.083.67257 | -0.09640 | 0.59660 | 0.63372 | 0.63467 | 0.52335 | 3.734E-04  | -3.421.48578 |
| NiTPP       | 0  | 5 | -2.083.61198 | -0.09666 | -2.083.61198 | -0.09666 | 0.59324 | 0.63064 | 0.63158 | 0.51981 | 3.749E-04  | -3.421.42472 |
| NiTPP       | 1  | 2 | -2.083.43964 | -0.09575 | -2.083.44019 | -0.09601 | 0.59829 | 0.63468 | 0.63562 | 0.52779 | 3.617E-04  | -3.421.25855 |
| NiTPP       | 1  | 4 | -2.083.44365 | -0.09688 | -2.083.44365 | -0.09688 | 0.59657 | 0.63354 | 0.63448 | 0.52424 | 3.698E-04  | -3.421.25446 |
| NiTPP       | 1  | 6 | -2.083.37487 | -0.09674 | -2.083.37487 | -0.09674 | 0.59353 | 0.63110 | 0.63205 | 0.51942 | 3.777E-04  | -3.421.18591 |
| PbTPP       | 0  | 1 | -1.916.10900 | -0.09523 | -1.916.10900 | -0.09523 | 0.59401 | 0.63189 | 0.63284 | 0.52036 | 3.773E-04  | -2.106.01488 |
| PbTPP       | 0  | 3 | -1.916.05911 | -0.09531 | -1.916.05911 | -0.09531 | 0.59135 | 0.62945 | 0.63039 | 0.51681 | 3.810E-04  | -2.105.96446 |
| PbTPP       | 0  | 5 | -1.915.99141 | -0.09524 | -1.915.99141 | -0.09524 | 0.58935 | 0.62784 | 0.62878 | 0.51350 | 3.867E-04  | -2.105.89664 |
| PbTPP       | 1  | 2 | -1.915.88856 | -0.09566 | -1.915.88856 | -0.09566 | 0.59436 | 0.63208 | 0.63303 | 0.52103 | 3.757E-04  | -2.105.79201 |
| PbTPP       | 1  | 4 | -1.915.82196 | -0.09554 | -1.915.82196 | -0.09554 | 0.59128 | 0.62960 | 0.63054 | 0.51608 | 3.839E-04  | -2.105.72562 |
| PbTPP       | 1  | 6 | -1.915.72849 | -0.09553 | -1.915.72849 | -0.09553 | 0.58789 | 0.62673 | 0.62767 | 0.51141 | 3.899E-04  | -2.105.63119 |
| PdTPP       | 0  | 1 | -2.040.64438 | -0.09747 | -2.040.64439 | -0.09746 | 0.59772 | 0.63455 | 0.63549 | 0.52555 | 3.687E-04  | -2.041.06686 |
| PdTPP       | 0  | 3 | -2.040.57988 | -0.09777 | -2.040.57988 | -0.09777 | 0.59367 | 0.63091 | 0.63185 | 0.52069 | 3.728E-04  | -2.041.00176 |
| PdTPP       | 0  | 5 | -2.040.50833 | -0.09769 | -2.040.50833 | -0.09769 | 0.59183 | 0.62951 | 0.63045 | 0.51721 | 3.798E-04  | -2.040.93008 |
| PdTPP       | 1  | 2 | -2.040.41130 | -0.09799 | -2.040.41130 | -0.09799 | 0.59729 | 0.63401 | 0.63495 | 0.52581 | 3.661E-04  | -2.040.83136 |
| PdTPP       | 1  | 4 | -2.040.33999 | -0.09787 | -2.040.33999 | -0.09787 | 0.59390 | 0.63128 | 0.63222 | 0.52034 | 3.752E-04  | -2.040.76031 |
| PdTPP       | 1  | 6 | -2.040.25065 | -0.09784 | -2.040.25065 | -0.09784 | 0.59018 | 0.62820 | 0.62914 | 0.51441 | 3.848E-04  | -2.040.67086 |
| O=Ti(IV)TPP | 0  | 1 | -2.046.39667 | -0.09842 | -2.046.39667 | -0.09842 | 0.60002 | 0.63820 | 0.63914 | 0.52649 | 3.779E-04  | -2.837.95494 |
| O=Ti(IV)TPP | 0  | 3 | -2.046.33174 | -0.09851 | -2.046.33174 | -0.09851 | 0.59769 | 0.63593 | 0.63688 | 0.52476 | 3.760E-04  | -2.837.88910 |
| O=Ti(IV)TPP | 0  | 5 | -2.046.26486 | -0.09842 | -2.046.26486 | -0.09842 | 0.59498 | 0.63363 | 0.63458 | 0.52091 | 3.812E-04  | -2.837.82207 |
| O=Ti(IV)TPP | 1  | 2 | -2.046.16114 | -0.09905 | -2.046.16114 | -0.09905 | 0.60001 | 0.63800 | 0.63895 | 0.52740 | 3.741E-04  | -2.837.71709 |
| O=Ti(IV)TPP | 1  | 4 | -2.046.09419 | -0.09915 | -2.046.09419 | -0.09915 | 0.59736 | 0.63577 | 0.63671 | 0.52353 | 3.796E-04  | -2.837.65019 |
| O=Ti(IV)TPP | 1  | 6 | -2.045.99968 | -0.09882 | -2.045.99968 | -0.09882 | 0.59342 | 0.63241 | 0.63335 | 0.51885 | 3.840E-04  | -2.837.55499 |
| O=V(IV)TPP  | 0  | 2 | -2.059.73414 | -0.09868 | -2.059.73414 | -0.09868 | 0.60096 | 0.63889 | 0.63984 | 0.52758 | 3.765E-04  | -2.932.47328 |
| O=V(IV)TPP  | 0  | 4 | -2.059.66824 | -0.09864 | -2.059.66824 | -0.09864 | 0.59842 | 0.63647 | 0.63741 | 0.52557 | 3.751E-04  | -2.932.40640 |
| O=V(IV)TPP  | 0  | 6 | -2.059.60196 | -0.09858 | -2.059.60196 | -0.09858 | 0.59581 | 0.63424 | 0.63518 | 0.52194 | 3.798E-04  | -2.932.33996 |
| O=V(IV)TPP  | 1  | 1 | -2.059.48045 | -0.09928 | -2.059.49865 | -0.09915 | 0.60061 | 0.63849 | 0.63943 | 0.52834 | 3.726E-04  | -2.932.22492 |
| O=V(IV)TPP  | 1  | 3 | -2.059.49860 | -0.09915 | -2.059.49860 | -0.09915 | 0.60062 | 0.63848 | 0.63943 | 0.52763 | 3.750E-04  | -2.932.23541 |
| O=V(IV)TPP  | 1  | 5 | -2.059.42967 | -0.09868 | -2.059.42967 | -0.09868 | 0.59813 | 0.63633 | 0.63727 | 0.52484 | 3.771E-04  | -2.932.16619 |
| ZnTPP       | 0  | 1 | -2.139.85144 | -0.09632 | -2.139.85144 | -0.09632 | 0.59580 | 0.63318 | 0.63412 | 0.52330 | 3.717E-04  | -3.692.54494 |
| ZnTPP       | 0  | 3 | -2.139.79116 | -0.09659 | -2.139.79116 | -0.09659 | 0.59238 | 0.63013 | 0.63108 | 0.51896 | 3.761E-04  | -3.692.48438 |
| ZnTPP       | 0  | 5 | -2.139.72230 | -0.09649 | -2.139.72230 | -0.09649 | 0.59070 | 0.62885 | 0.62980 | 0.51586 | 3.821E-04  | -3.692.41542 |
| ZnTPP       | 1  | 2 | -2.139.62203 | -0.09681 | -2.139.62203 | -0.09681 | 0.59573 | 0.63301 | 0.63396 | 0.52374 | 3.697E-04  | -3.692.31331 |
| ZnTPP       | 1  | 4 | -2.139.55363 | -0.09666 | -2.139.55363 | -0.09666 | 0.59274 | 0.63062 | 0.63157 | 0.51876 | 3.784E-04  | -3.692.24521 |
| ZnTPP       | 1  | 6 | -2.139.45616 | -0.09653 | -2.139.45616 | -0.09653 | 0.58909 | 0.62759 | 0.62853 | 0.51359 | 3.855E-04  | -3.692.14730 |
| H-AgTPP     | -1 | 2 | -2.060.24464 | -0.10143 | -2.060.24464 | -0.10143 | 0.59705 | 0.63571 | 0.63665 | 0.52317 | 3.8061E-04 | -2.060.66977 |
| H-AgTPP     | -1 | 4 | -2.060.21421 | -0.10010 | -2.060.21421 | -0.10010 | 0.59455 | 0.63317 | 0.63411 | 0.52054 | 3.8092E-04 | -2.060.63944 |
| H-AgTPP     | -1 | 6 | -2.060.15799 | -0.10025 | -2.060.15799 | -0.10025 | 0.59207 | 0.63101 | 0.63195 | 0.51735 | 3.8438E-04 | -2.060.58262 |
| H-AgTPP     | 0  | 1 | -2.060.23631 | -0.10276 | -2.060.23631 | -0.10276 | 0.60658 | 0.64454 | 0.64549 | 0.53437 | 3.7267E-04 | -2.060.66032 |
| H-AgTPP     | 0  | 3 | -2.060.15457 | -0.09999 | -2.060.15457 | -0.09999 | 0.59816 | 0.63652 | 0.63747 | 0.52441 | 3.7921E-04 | -2.060.57837 |
| H-AgTPP     | 0  | 5 | -2.060.09518 | -0.10032 | -2.060.09518 | -0.10032 | 0.59450 | 0.63325 | 0.63420 | 0.52025 | 3.8218E-04 | -2.060.51862 |
| H-AgTPP     | 1  | 2 | -2.059.93479 | -0.10150 | -2.059.93479 | -0.10150 | 0.59961 | 0.63754 | 0.63849 | 0.52831 | 3.6954E-04 | -2.060.35574 |
| H-AgTPP     | 1  | 4 | -2.059.92270 | -0.10071 | -2.059.92270 | -0.10071 | 0.59783 | 0.63615 | 0.63709 | 0.52478 | 3.7670E-04 | -2.060.34435 |
| H-AgTPP     | 1  | 6 | -2.059.84890 | -0.09990 | -2.059.84890 | -0.09990 | 0.59507 | 0.63382 | 0.63476 | 0.52098 | 3.8164E-04 | -2.060.27046 |
| H-AlTPP     | 0  | 1 | -2.155.79716 | -0.09483 | -2.155.79716 | -0.09483 | 0.60541 | 0.64237 | 0.64332 | 0.53275 | 3.7085E-04 | -2.156.20592 |
| H-BaTPP     | 0  | 2 | -1.938.71315 | -0.09512 | -1.938.71315 | -0.09512 | 0.59386 | 0.63350 | 0.63445 | 0.51778 | 3.9132E-04 | -1.939.12629 |
| H-BaTPP     | 0  | 4 | -1.938.65872 | -0.09871 | -1.938.65872 | -0.09871 | 0.59213 | 0.63183 | 0.63278 | 0.51646 | 3.9012E-04 | -1.939.07143 |
| H-BaTPP     | 0  | 6 | -1.938.58885 | -0.09930 | -1.938.58885 | -0.09930 | 0.58934 | 0.62958 | 0.63053 | 0.51198 | 3.9762E-04 | -1.939.00181 |
| H-CdTPP     | 0  | 2 | -2.080.97451 | -0.10047 | -2.080.97451 | -0.10047 | 0.59819 | 0.63686 | 0.63780 | 0.52411 | 3.8133E-04 | -2.081.40159 |
| H-CdTPP     | 0  | 4 | -2.080.90522 | -0.10044 | -2.080.90522 | -0.10044 | 0.59581 | 0.63483 | 0.63577 | 0.52096 | 3.8508E-04 | -2.081.33218 |
| H-CdTPP     | 0  | 6 | -2.080.82433 | -0.10141 | -2.080.82433 | -0.10141 | 0.59030 | 0.62877 | 0.62971 | 0.51590 | 3.8174E-04 | -2.081.25062 |
| H-CoTPP     | -1 | 2 | -2.059.19784 | -0.09802 | -2.059.19785 | -0.09802 | 0.60166 | 0.63904 | 0.63999 | 0.52844 | 3.7413E-04 | -3.296.56790 |
| H-CoTPP     | -1 | 4 | -2.059.18698 | -0.09741 | -2.059.18698 | -0.09741 | 0.59783 | 0.63627 | 0.63722 | 0.52365 | 3.8092E-04 | -3.296.54862 |
| H-CoTPP     | -1 | 6 | -2.059.15619 | -0.09767 | -2.059.15619 | -0.09767 | 0.59684 | 0.63497 | 0.63591 | 0.52279 | 3.7942E-04 | -3.296.51974 |
| H-CoTPP     | 0  | 1 | -2.059.14650 | -0.09790 | -2.059.14649 | -0.09790 | 0.60617 | 0.64315 | 0.64410 | 0.53273 | 3.7352E-04 | -3.296.51514 |
| H-CoTPP     | 0  | 3 | -2.059.11335 | -0.09774 | -2.059.11335 | -0.09774 | 0.60117 | 0.63933 | 0.64027 | 0.52692 | 3.8018E-04 | -3.296.47721 |
| H-CoTPP     | 0  | 5 | -2.059.09847 | -0.09752 | -2.059.09847 | -0.09752 | 0.60064 | 0.63853 | 0.63947 | 0.52636 | 3.7939E-04 | -3.296.46037 |
| H-CoTPP     | 1  | 2 | -2.058.91409 | -0.09817 | -2.058.91409 | -0.09817 | 0.60555 | 0.64246 | 0.64341 | 0.53383 | 3.6751E-04 | -3.296.28016 |
| H-CoTPP     | 1  | 4 | -2.058.88427 | -0.09840 | -2.058.88427 | -0.09841 | 0.60165 | 0.63934 | 0.64028 | 0.52940 | 3.7192E-04 | -3.296.19551 |
| H-CoTPP     | 1  | 6 | -2.058.86570 | -0.09835 | -2.058.86570 | -0.09835 | 0.60074 | 0.63831 | 0.63926 | 0.52823 | 3.7241E-04 | -3.296.22495 |
| H-CrTPP     | 0  | 2 | -2.000.30062 | -0.09656 | -2.000.30062 | -0.09656 | 0.60317 | 0.64067 | 0.64161 | 0.52988 | 3.7476E-04 | -2.958.18863 |
| H-CrTPP     | 0  | 4 | -2.000.33865 | -0.09653 | -2.000.33865 | -0.09653 | 0.60359 | 0.64088 | 0.64182 | 0.53010 | 3.7470E-04 | -2.958.22535 |
| H-CrTPP     | 0  | 6 | -2.000.27357 | -0.09533 | -2.000.27357 | -0.09533 | 0.59706 | 0.63458 | 0.63552 | 0.52314 | 3.7694E-04 | -2.958.15983 |
| H-CuTPP     | 0  | 1 | -2.110.54481 | -0.09974 | -2.110.55977 | -0.10023 | 0.59981 | 0.63791 | 0.63885 | 0.52722 | 3.7442E-04 | -3.554.15488 |
| H-CuTPP     | 0  | 3 | -2.110.56414 | -0.09975 | -2.110.56414 | -0.09975 | 0.59993 | 0.63801 | 0.63895 | 0.52563 | 3.8009E-04 | -3.554.17388 |
| H-CuTPP     | 0  | 5 | -2.110.50010 | -0.10016 | -2.110.50010 | -0.10016 | 0.59617 | 0.63461 | 0.63555 | 0.52162 | 3.8212E-04 | -3.554.10955 |
| H-FeTPP     | -1 | 1 | -2.037.27142 | -0.09894 | -2.037.27142 | -0.09894 | 0.60267 | 0.63972 | 0.64067 | 0.53120 | 3.6716E-04 | -3.177.49649 |
| H-FeTPP     | -1 | 3 | -2.037.26671 | -0.09886 | -2.037.26671 | -0.09886 | 0.59903 | 0.63686 | 0.63780 | 0.52513 | 3.7792E-04 | -3.177.48958 |
| H-FeTPP     | -1 | 5 | -2.037.25115 | -0.09882 | -2.037.25116 | -0.09881 | 0.59840 | 0.63629 | 0.63723 | 0.52393 | 3.8001E-04 | -3.177.47269 |

|                      |   |   |              |          |              |          |         |         |         |          |            |              |
|----------------------|---|---|--------------|----------|--------------|----------|---------|---------|---------|----------|------------|--------------|
| H-FeTPP              | 0 | 2 | -2 037.21428 | -0.09860 | -2 037.21428 | -0.09860 | 0.60420 | 0.64161 | 0.64255 | 0.53023  | 3.7672E-04 | -3 177.43572 |
| H-FeTPP              | 0 | 4 | -2 037.19377 | -0.09851 | -2 037.19406 | -0.09849 | 0.60203 | 0.63972 | 0.64066 | 0.52742  | 3.7982E-04 | -3 177.41417 |
| H-FeTPP              | 0 | 6 | -2 037.20100 | -0.09827 | -2 037.20100 | -0.09826 | 0.60154 | 0.63931 | 0.64025 | 0.52722  | 3.7912E-04 | -3 177.41697 |
| H-FeTPP              | 1 | 1 | -2 036.94215 | -0.09944 | -2 036.98309 | -0.09949 | 0.60447 | 0.64150 | 0.64244 | 0.53375  | 3.6457E-04 | -3 177.19534 |
| H-FeTPP              | 1 | 3 | -2 036.99075 | -0.09930 | -2 036.99075 | -0.09930 | 0.60496 | 0.64212 | 0.64306 | 0.53216  | 3.7195E-04 | -3 177.21144 |
| H-FeTPP              | 1 | 5 | -2 036.97703 | -0.09880 | -2 036.97703 | -0.09880 | 0.60206 | 0.63970 | 0.64065 | 0.52885  | 3.7499E-04 | -3 177.17054 |
| H-H <sub>2</sub> TPP | 0 | 2 | -1 914.41101 | -0.09436 | -1 914.41101 | -0.09436 | 0.62920 | 0.66613 | 0.66707 | 0.55770  | 3.6685E-04 | -1 914.80029 |
| H-MgTPP              | 0 | 2 | -2 113.36678 | -0.09674 | -2 113.36678 | -0.09674 | 0.59816 | 0.63662 | 0.63756 | 0.52442  | 3.7946E-04 | -2 113.77110 |
| H-MnTPP              | 0 | 1 | -2 017.59432 | -0.09858 | -2 017.63089 | -0.09849 | 0.60323 | 0.64095 | 0.64189 | 0.53100  | 3.7192E-04 | -3 064.66452 |
| H-MnTPP              | 0 | 3 | -2 017.65149 | -0.09849 | -2 017.65149 | -0.09849 | 0.60418 | 0.64139 | 0.64234 | 0.53150  | 3.7177E-04 | -3 064.71997 |
| H-MnTPP              | 0 | 5 | -2 017.65075 | -0.09809 | -2 017.65075 | -0.09809 | 0.60081 | 0.63886 | 0.63981 | 0.52635  | 3.8054E-04 | -3 064.71572 |
| H-NiTPP              | 0 | 2 | -2 084.22124 | -0.09798 | -2 084.22125 | -0.09797 | 0.60262 | 0.64033 | 0.64127 | 0.52918  | 3.7598E-04 | -3 422.03989 |
| H-NiTPP              | 0 | 4 | -2 084.18246 | -0.09947 | -2 084.18246 | -0.09947 | 0.60171 | 0.63987 | 0.64082 | 0.52710  | 3.8139E-04 | -3 421.99460 |
| H-NiTPP              | 0 | 6 | -2 084.11327 | -0.09947 | -2 084.11327 | -0.09947 | 0.59960 | 0.63781 | 0.63875 | 0.52623  | 3.7740E-04 | -3 421.92786 |
| H-NiTPP              | 1 | 1 | -2 083.99221 | -0.09851 | -2 083.99221 | -0.09851 | 0.60578 | 0.64281 | 0.64376 | 0.53512  | 3.6439E-04 | -3 421.81381 |
| H-NiTPP              | 1 | 3 | -2 083.99089 | -0.09872 | -2 083.99089 | -0.09872 | 0.60271 | 0.64013 | 0.64108 | 0.53088  | 3.6962E-04 | -3 421.80656 |
| H-NiTPP              | 1 | 5 | -2 083.94992 | -0.10045 | -2 083.94992 | -0.10045 | 0.60088 | 0.63861 | 0.63956 | 0.52831  | 3.7313E-04 | -3 421.76265 |
| H-PbTPP              | 0 | 2 | -1 916.57969 | -0.09519 | -1 916.57969 | -0.09519 | 0.60001 | 0.63804 | 0.63898 | 0.52657  | 3.7701E-04 | -2 106.47791 |
| H-PbTPP              | 0 | 4 | -1 916.51688 | -0.09502 | -1 916.51688 | -0.09502 | 0.59814 | 0.63653 | 0.63747 | 0.52324  | 3.8312E-04 | -2 106.41401 |
| H-PbTPP              | 0 | 6 | -1 916.47043 | -0.09915 | -1 916.47044 | -0.09915 | 0.59003 | 0.63059 | 0.63154 | 0.51160  | 4.0226E-04 | -2 106.37449 |
| H-PdTPP              | 0 | 2 | -2 041.15873 | -0.10037 | -2 041.15873 | -0.10037 | 0.60143 | 0.63904 | 0.63999 | 0.52802  | 3.7553E-04 | -2 041.58109 |
| H-PdTPP              | 0 | 4 | -2 041.08935 | -0.10025 | -2 041.08935 | -0.10025 | 0.59896 | 0.63655 | 0.63749 | 0.52689  | 3.7094E-04 | -2 041.51064 |
| H-PdTPP              | 0 | 6 | -2 041.02369 | -0.10048 | -2 041.02369 | -0.10048 | 0.59586 | 0.63428 | 0.63523 | 0.52031  | 3.8543E-04 | -2 041.44531 |
| H-[O=Ti(IV)TPP]      | 0 | 2 | -2 046.89844 | -0.10270 | -2 046.89842 | -0.10270 | 0.60069 | 0.64110 | 0.64204 | 0.52301  | 3.9923E-04 | -2 838.45711 |
| H-[O=Ti(IV)TPP]      | 0 | 4 | -2 046.83106 | -0.10306 | -2 046.83106 | -0.10306 | 0.59858 | 0.63885 | 0.63979 | 0.52224  | 3.9425E-04 | -2 838.38908 |
| H-[O=Ti(IV)TPP]      | 0 | 6 | -2 046.73700 | -0.10280 | -2 046.73700 | -0.10280 | 0.59617 | 0.63668 | 0.63763 | 0.51952  | 3.9615E-04 | -2 838.29493 |
| H-[O=V(IV)TPP]       | 0 | 1 | -2 060.21090 | -0.10175 | -2 060.23681 | -0.10302 | 0.60279 | 0.64206 | 0.64301 | 0.52920  | 3.8171E-04 | -2 932.95214 |
| H-[O=V(IV)TPP]       | 0 | 3 | -2 060.23630 | -0.10303 | -2 060.23630 | -0.10303 | 0.60248 | 0.64196 | 0.64290 | 0.52762  | 3.8664E-04 | -2 932.97560 |
| H-[O=V(IV)TPP]       | 0 | 5 | -2 060.16899 | -0.10340 | -2 060.16899 | -0.10340 | 0.59940 | 0.63855 | 0.63950 | 0.52521  | 3.8334E-04 | -2 932.90759 |
| H-ZnTPP              | 0 | 2 | -2 140.36519 | -0.09883 | -2 140.36519 | -0.09883 | 0.59973 | 0.63794 | 0.63889 | 0.52627  | 3.7773E-04 | -3 693.05788 |
| H-ZnTPP              | 0 | 4 | -2 140.29271 | -0.10109 | -2 140.29271 | -0.10109 | 0.59354 | 0.63318 | 0.63413 | 0.51748  | 3.9124E-04 | -3 692.98655 |
| H-ZnTPP              | 0 | 6 | -2 140.22011 | -0.09950 | -2 140.22011 | -0.09950 | 0.59228 | 0.63178 | 0.63273 | 0.51693  | 3.8839E-04 | -3 692.91313 |
| H <sub>2</sub>       | 0 | 1 | -1.17897     | 0.00000  | -1.17897     | 0.00000  | 0.01012 | 0.01248 | 0.01343 | -0.00137 | 4.9619E-05 | -1.17957     |

## 3 Catalysis

### 3.1 CVs before and after catalysis

Figure S16 shows CVs in 0.1 M TBAPF<sub>6</sub>/DCM before and after catalysis for H<sub>2</sub>TPP, FeTPP, CoTPP, NiTPP, CuTPP and ZnTPP. The small reductive wave around -1.4 V vs. Fc/Fc<sup>+</sup> visible for some porphyrins is caused by trace amounts of oxygen, and the small reversible peak at 0 V vs. Fc/Fc<sup>+</sup> is the ferrocene reaction.

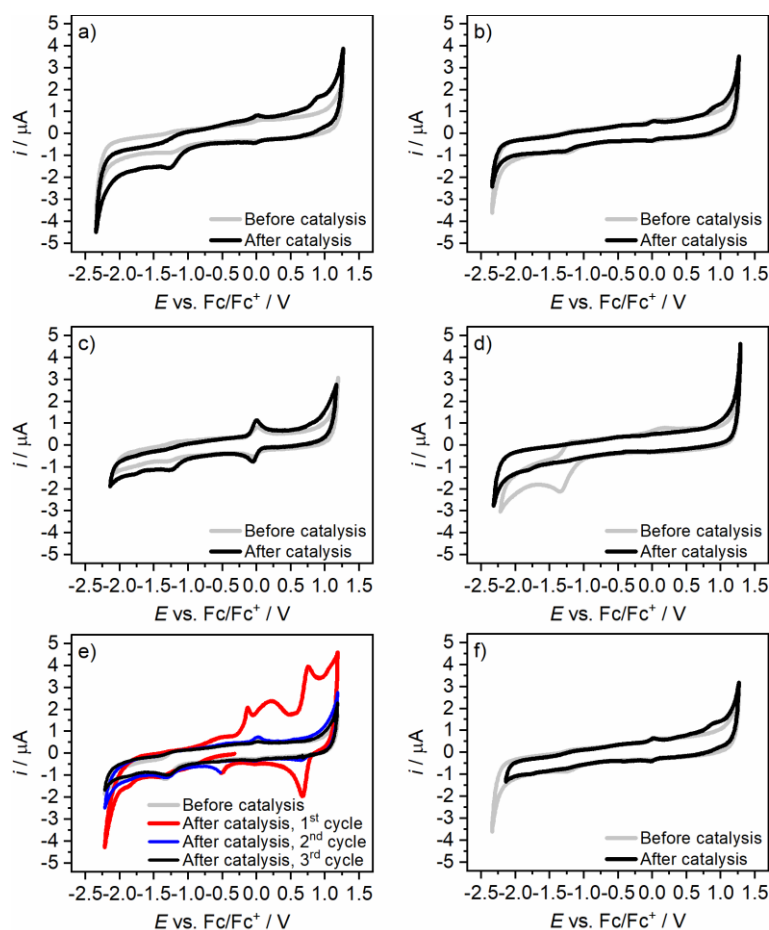

**Figure S16.** CV before and after catalysis for a) H<sub>2</sub>TPP, b) FeTPP, c) CoTPP, d) NiTPP, e) CuTPP and f) ZnTPP.

### 3.2 UV/vis absorbance of BzOH

Figure S17 shows the UV/vis absorbance spectrum of BzOH in DCM, normalized by the maximum absorbance.

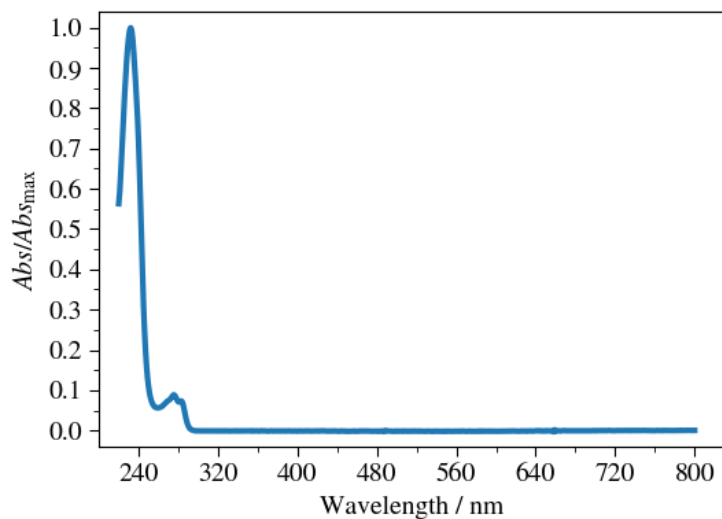

**Figure S17.** UV/vis absorbance spectrum of BzOH in DCM.

### 3.3 EPEP kinetics

For the EPEP mechanism, a rate equation can be obtained from the following:

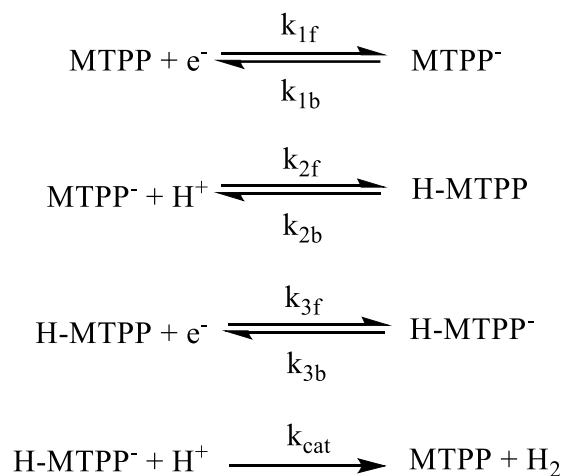

$$\frac{d[\text{MTPP}^-]}{dt} = k_{1f}[\text{MTPP}] - k_{1b}[\text{MTPP}^-] - k_{2f}[\text{MTPP}^-][\text{H}^+] \quad (1)$$

$$\frac{d[\text{H-MTPP}]}{dt} = k_{2f}[\text{MTPP}^-][\text{H}^+] + k_{3b}[\text{H-MTPP}^-] - k_{2b}[\text{H-MTPP}] - k_{3f}[\text{H-MTPP}] \quad (2)$$

$$\frac{d[\text{H-MTPP}^-]}{dt} = k_{3f}[\text{H-MTPP}] - k_{3b}[\text{H-MTPP}^-] - k_{\text{cat}}[\text{H-MTPP}^-][\text{H}^+] \quad (3)$$

Assuming steady state, such that all the above derivatives are 0, gives

$$\begin{aligned} \frac{d[\text{H}_2]}{dt} &= k_{\text{cat}}[\text{H-MTPP}^-][\text{H}^+] \\ &= \frac{k_{1f}k_{2f}k_{3f}k_{\text{cat}}[\text{H}^+]^2[\text{MTPP}]}{k_{1b}k_{2b}k_{3b} + k_{1b}k_{2b}k_{\text{cat}}[\text{H}^+] + k_{1b}k_{3b}k_{\text{cat}}[\text{H}^+] + k_{2f}k_{3f}k_{\text{cat}}[\text{H}^+]^2} \end{aligned} \quad (4)$$

### 3.4 Reaction rates and reaction orders at reference potentials

Figure S18-S23 show the reaction rates and reaction order fits at  $E = -2 \text{ V}$  and  $E = -2.15 \text{ V}$  vs.  $\text{Fc}/\text{Fc}^+$ . Only these two potentials were used in the fit, as the concentration of active catalyst at the electrode surface  $C_{\text{cat}}$  can be approximated as the bulk concentration of the catalytic compound  $C_{\text{cat}}^*$  at high driving forces. Then, the reaction rates and linear reaction order fits can be used to obtain an approximate value of the global catalytic rate constant through

$$\text{Rate} \propto k_{\text{cat}}C_{\text{cat}}[\text{H}^+] \approx k_{\text{cat}}C_{\text{cat}}^*[\text{H}^+] \propto \text{slope} \cdot [\text{H}^+] \quad (5)$$

Figure S24 shows LSVs of  $\text{H}_2\text{TPP}$ ,  $\text{FeTPP}$ ,  $\text{CoTPP}$ ,  $\text{NiTPP}$ ,  $\text{CuTPP}$  and  $\text{ZnTPP}$  at varying concentrations in the presence of approximately 44 mM  $\text{BzOH}$ , and Figure S25 shows linear fits of the peak current as a function porphyrin concentration. Figure 26 and Figure 27 show the relation between the reaction rates and the binding energies, and between the corresponding rate constants and the binding energies, respectively. Figure 28 shows the relation between the reaction rates and the half-wave potential of the first reduction reaction involved in catalysis.

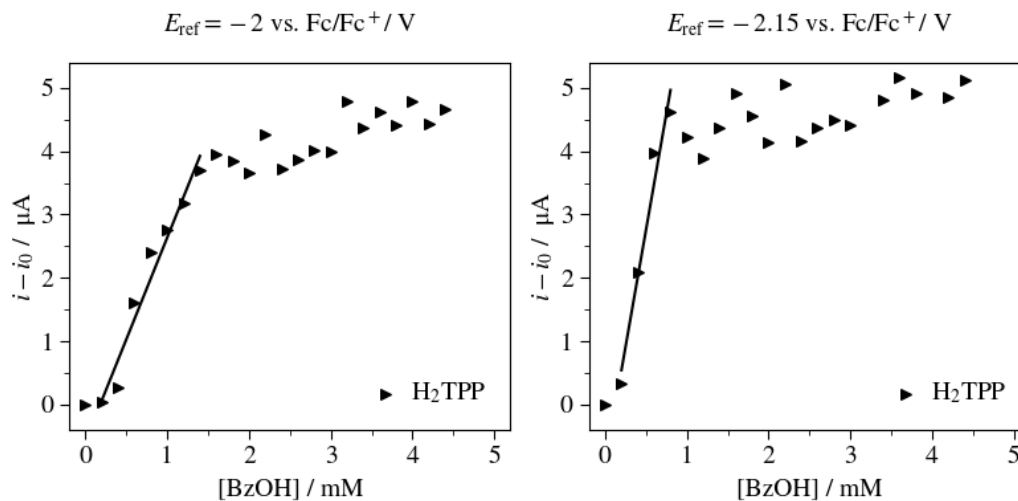

**Figure S18.** Reaction order fits for H<sub>2</sub>TPP at  $E_{\text{ref}} = -2$  and  $-2.15$  V vs. Fc/Fc<sup>+</sup>.

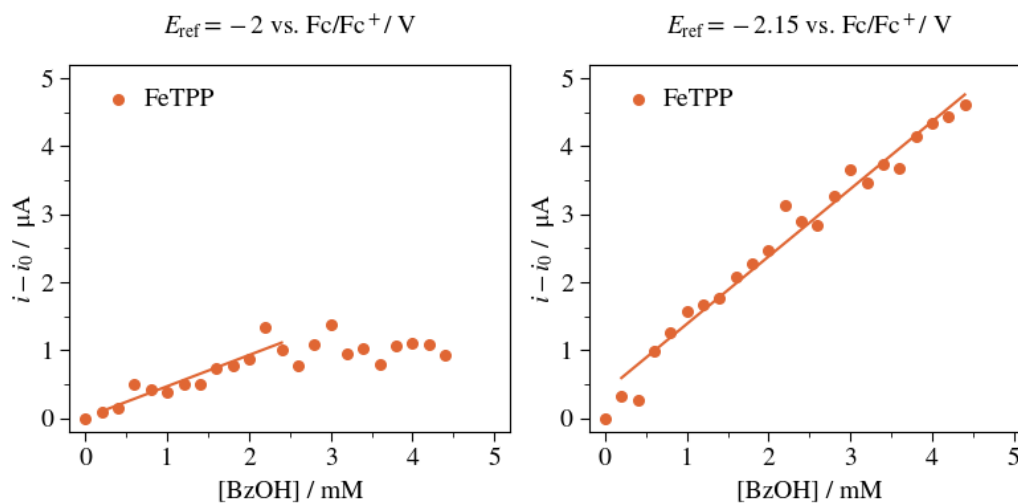

**Figure S19.** Reaction order fits for FeTPP at  $E_{\text{ref}} = -2$  and  $-2.15$  V vs. Fc/Fc<sup>+</sup>.

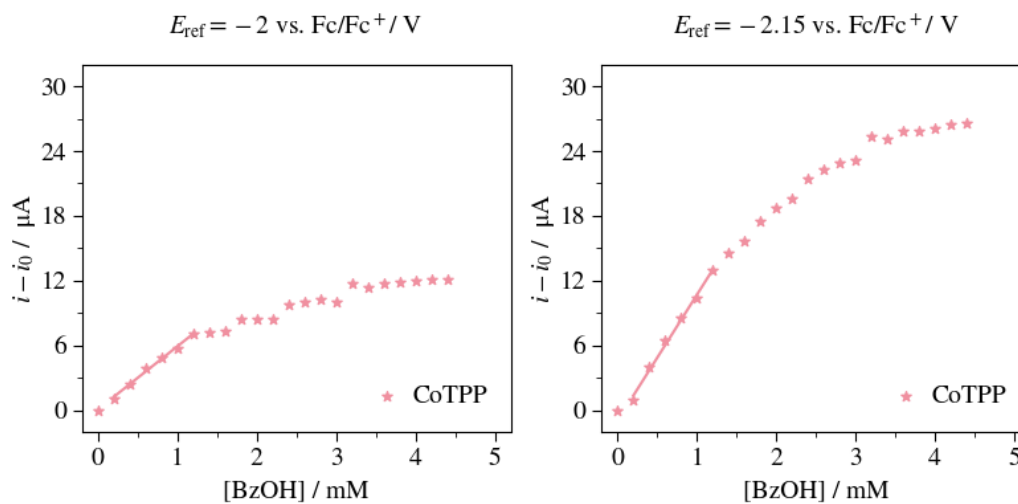

**Figure S20.** Reaction order fits for CoTPP at  $E_{\text{ref}} = -2$  and  $-2.15$  V vs. Fc/Fc<sup>+</sup>.

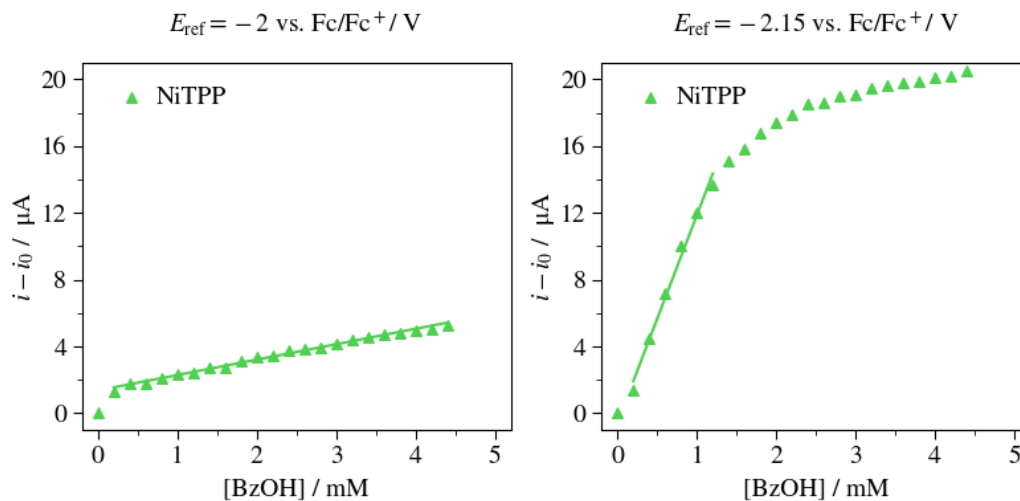

**Figure S21.** Reaction order fits for NiTPP at  $E_{\text{ref}} = -2$  and  $-2.15$  V vs.  $\text{Fc}/\text{Fc}^+$ .

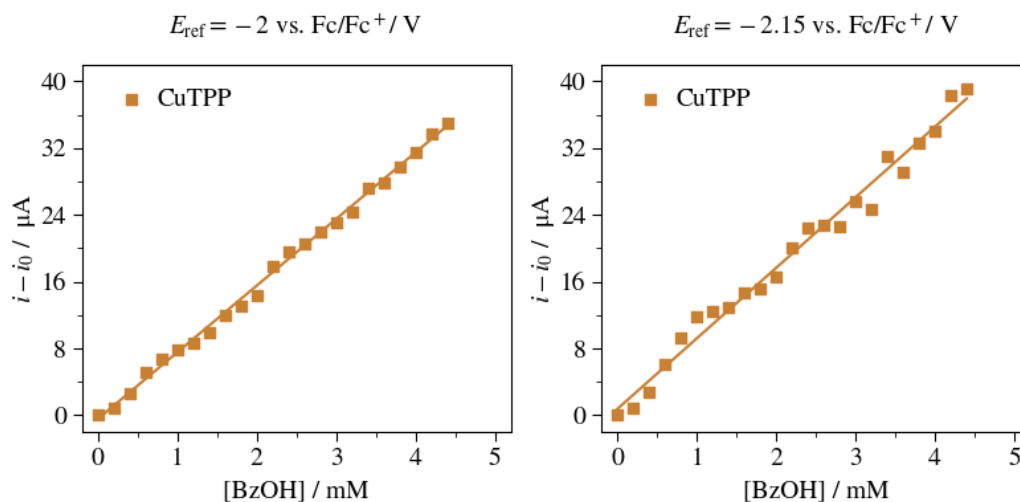

**Figure S22.** Reaction order fits for CuTPP at  $E_{\text{ref}} = -2$  and  $-2.15$  V vs.  $\text{Fc}/\text{Fc}^+$ .

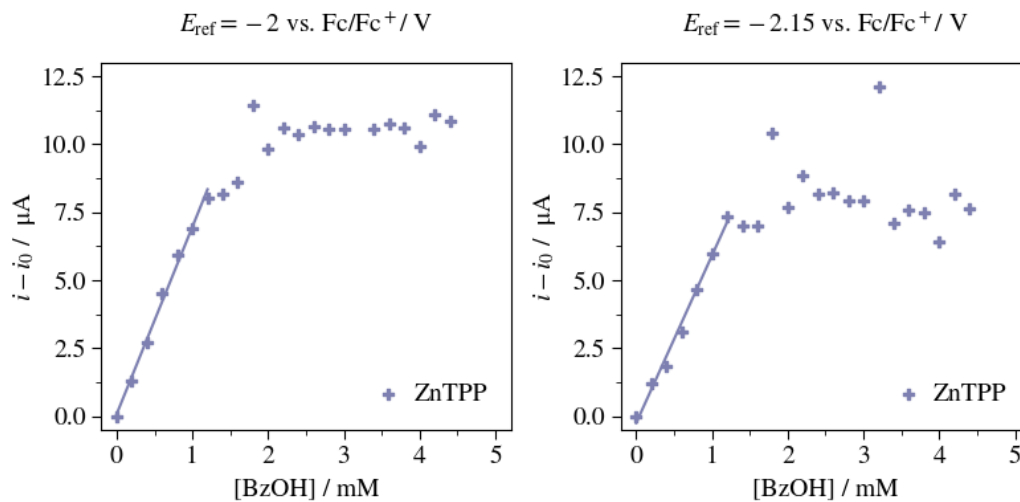

**Figure S23.** Reaction order fits for ZnTPP at  $E_{\text{ref}} = -2$  and  $-2.15$  V vs.  $\text{Fc}/\text{Fc}^+$ .



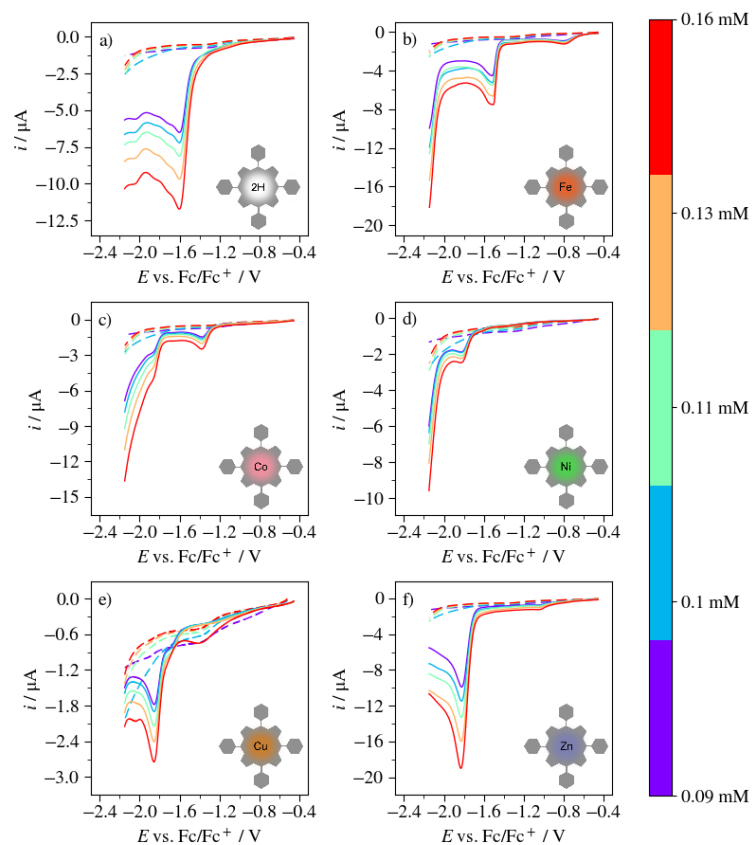

**Figure S24.** LSVs of H<sub>2</sub>TPP, FeTPP, CoTPP, NiTPP, CuTPP and ZnTPP in the presence of approximately 44 mM BzOH. (0.1 M TBAPF<sub>6</sub>/DCM, 0.1 V/s). The colorbar indicates [MTPP].

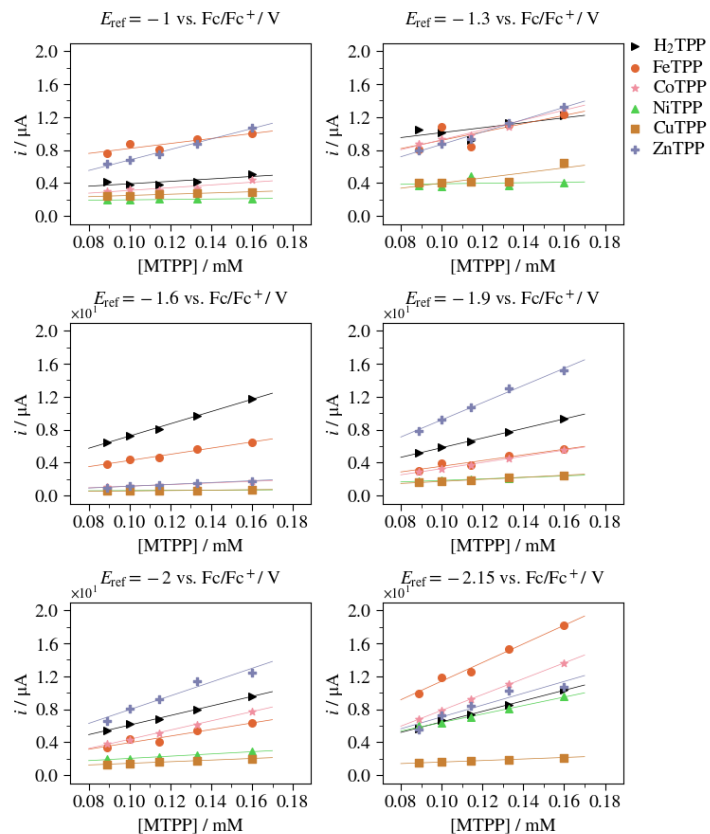

**Figure S25.** Current as a function of porphyrin concentration at various  $E_{\text{ref}}$ , including linear fits showing a first order reaction.

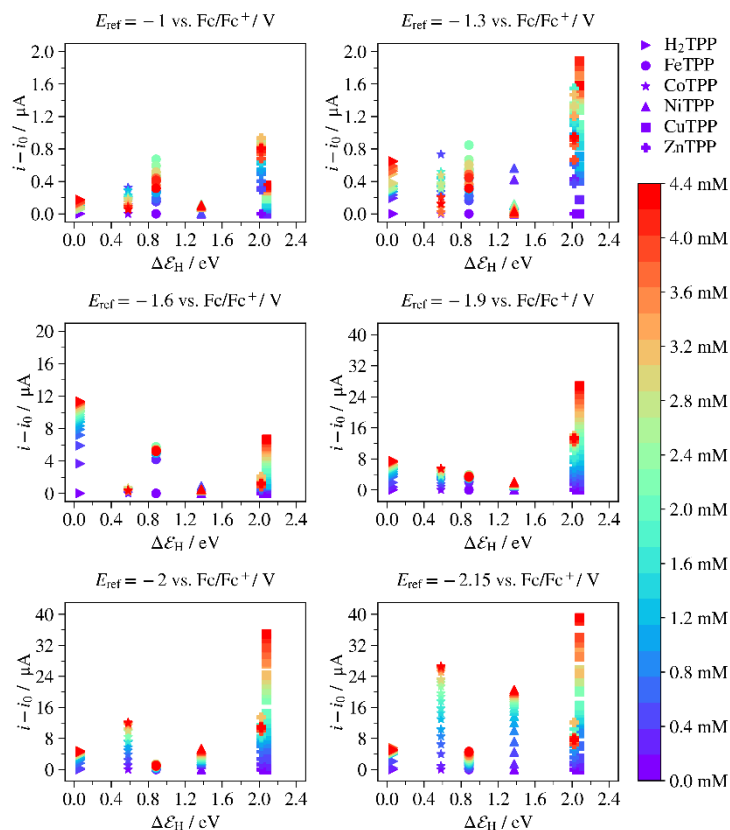

**Figure S26.** Reaction rates at various  $E_{\text{ref}}$  as a function of binding energy. The colorbar indicates [BzOH].

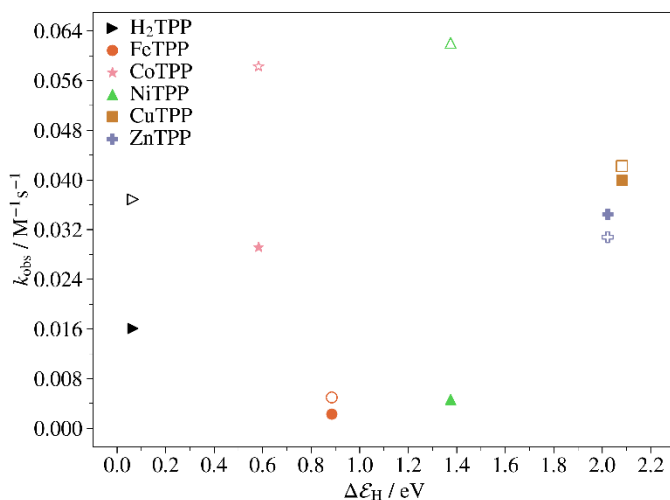

**Figure S27.** Rate constant  $k_{\text{obs}}$  calculated from the linear portion of the reaction rates marked in Figure S18-S23. Filled markers represent values obtained using  $E_{\text{ref}} = -2$  vs.  $\text{Fc}/\text{Fc}^+$  and empty markers represent values obtained using  $E_{\text{ref}} = -2.15$  V vs.  $\text{Fc}/\text{Fc}^+$ .

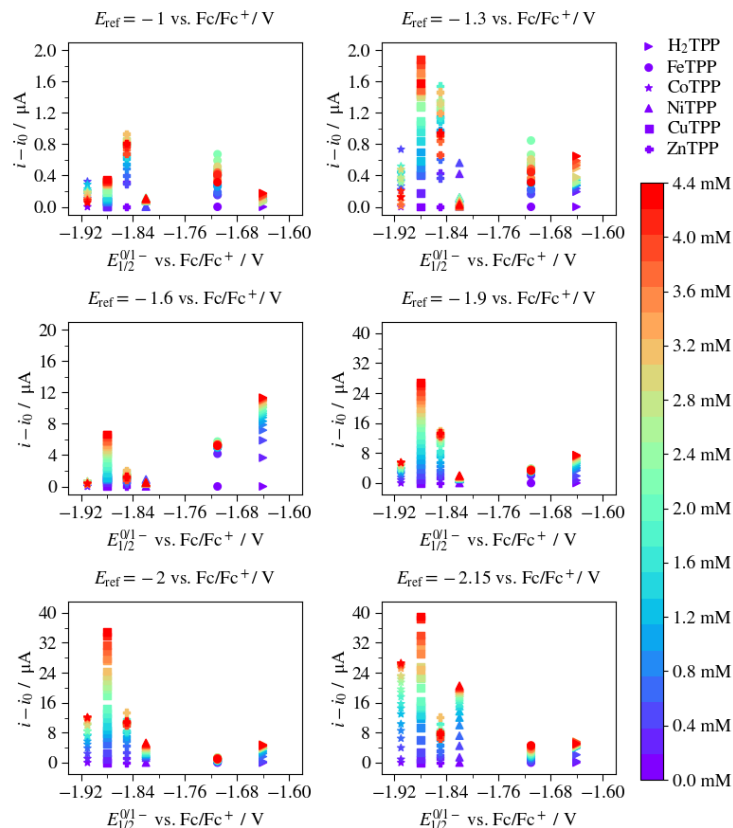

**Figure 28.** Reactions rates obtained at various  $E_{\text{ref}}$ . vs. the half-wave potential of the first reduction reaction involved in catalysis ( $L^0/L^{1-}$  for all porphyrins except FeTPP, for which  $M(\text{II})/M(\text{I})$  was used). The colorbar indicates  $[\text{BzOH}]$ .

### 3.5 Reaction rates from the Tafel equation

Figure S29-S34 illustrate the process of obtaining reaction rates through linear fits of the Tafel equations for  $\text{H}_2\text{TPP}$ ,  $\text{FeTPP}$ ,  $\text{CoTPP}$ ,  $\text{NiTPP}$ ,  $\text{CuTPP}$ ,  $\text{ZnTPP}$ . Figure S35 shows a summary of these rate equations, and Table S7 shows the charge transfer coefficients  $\alpha$  obtained from the linear fits. Figure 36 and Figure 37 show the relation between the reaction rates and the binding energies, and between the corresponding rate constants and the binding energies, respectively.

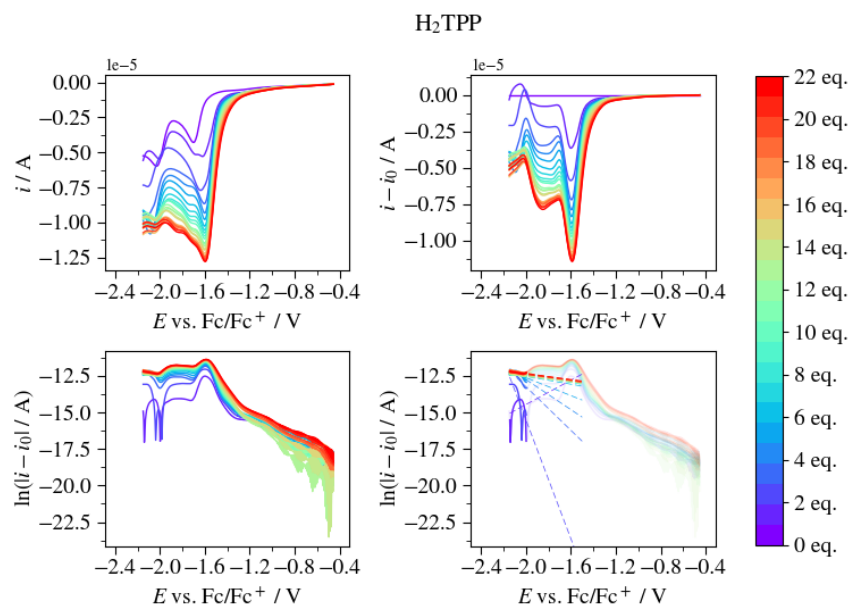

**Figure S29.** LSV, LSV subtracted by pure porphyrin response, logarithm of current difference, and logarithm of current difference with Tafel equation linear fit for H<sub>2</sub>TPP. The colorbar indicates the amount of BzOH.

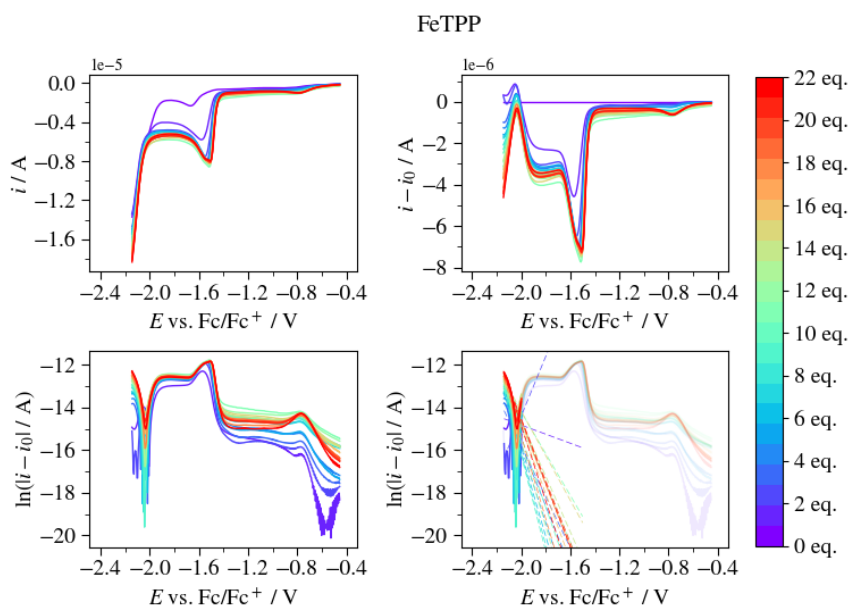

**Figure S30.** LSV, LSV subtracted by non-catalytic porphyrin response, logarithm of current difference, and logarithm of current difference with Tafel equation linear fit for FeTPP. The colorbar indicates the amount of BzOH.

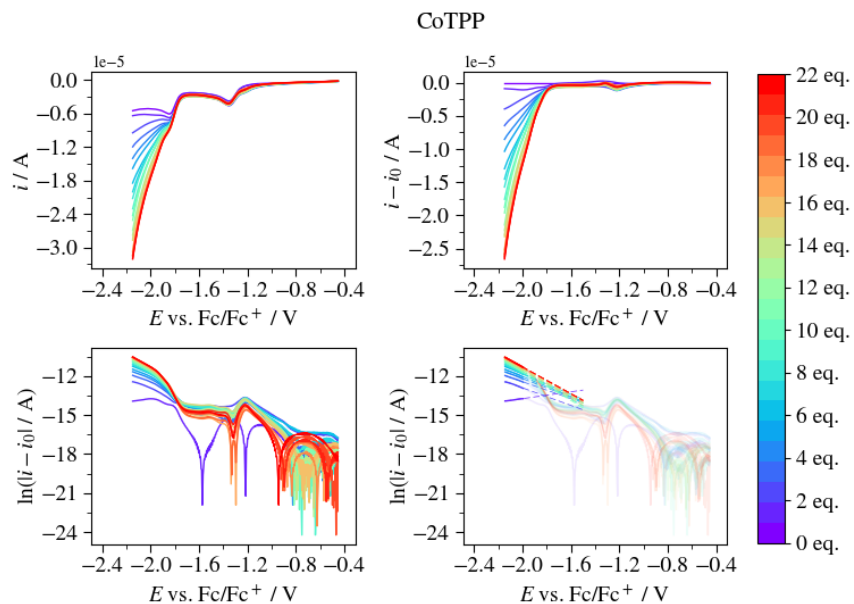

**Figure S31.** LSV, LSV subtracted by non-catalytic porphyrin response, logarithm of current difference, and logarithm of current difference with Tafel equation linear fit for CoTPP. The colorbar indicates the amount of BzOH.

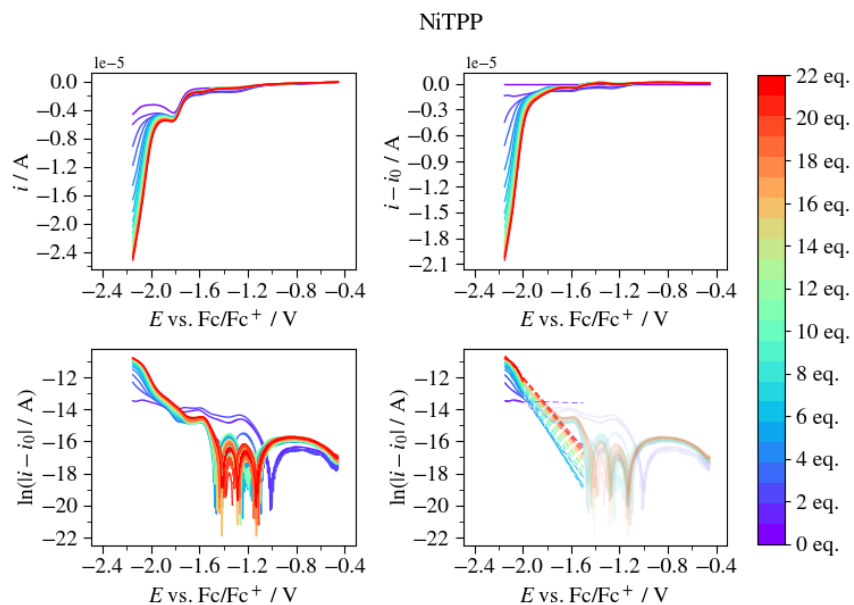

**Figure S32.** LSV, LSV subtracted by non-catalytic porphyrin response, logarithm of current difference, and logarithm of current difference with Tafel equation linear fit for NiTPP. The colorbar indicates the amount of BzOH.

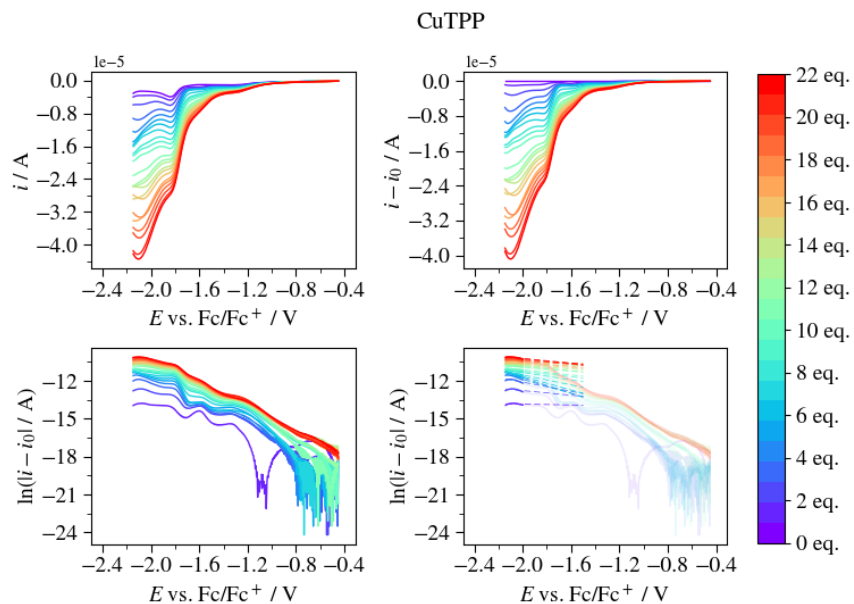

**Figure S33.** LSV, LSV subtracted by non-catalytic porphyrin response, logarithm of current difference, and logarithm of current difference with Tafel equation linear fit for CuTPP. The colorbar indicates the amount of BzOH.

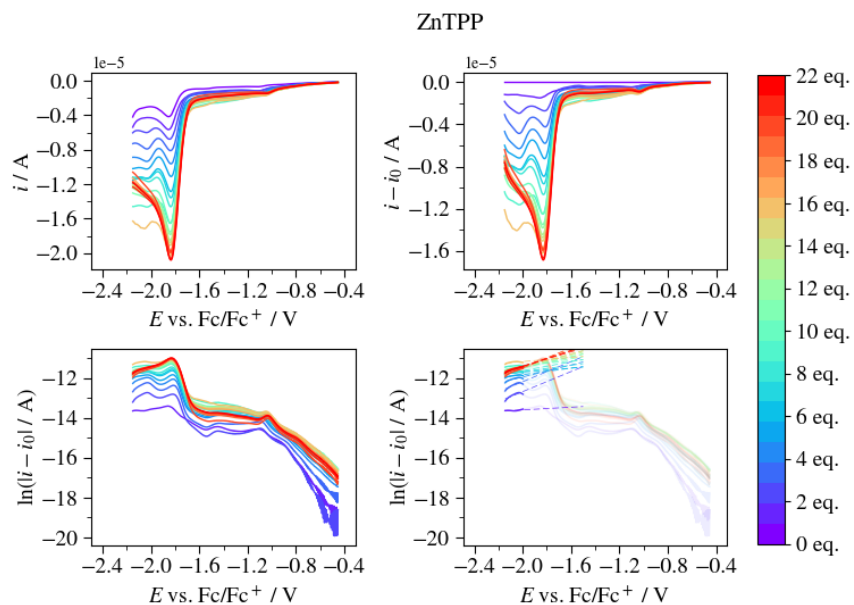

**Figure S34.** LSV, LSV subtracted by non-catalytic porphyrin response, logarithm of current difference, and logarithm of current difference with Tafel equation linear fit for ZnTPP. The colorbar indicates the amount of BzOH.

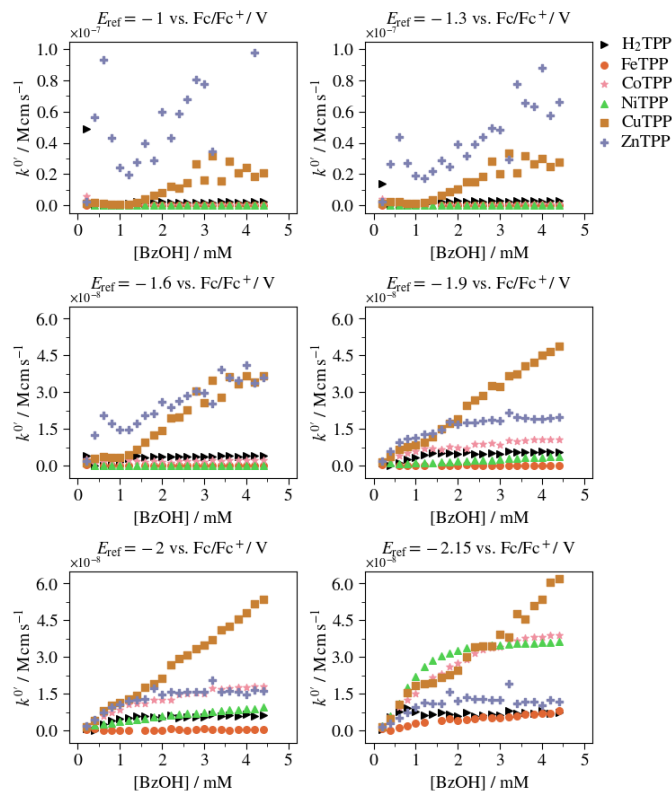

**Figure S35.** Reaction rates calculated from linear fits of the Tafel equation between -2 and -2.15 V vs. Fc/Fc<sup>+</sup> using various  $E_{\text{ref}}$ .

**Table S7.** Charge transfer coefficient  $\alpha$  calculated from linear fits of the Tafel equation.

| Eq. | [BzOH] | H <sub>2</sub> TPP | FeTPP  | CoTPP  | NiTPP  | CuTPP  | ZnTPP  |
|-----|--------|--------------------|--------|--------|--------|--------|--------|
| 1   | 0.20   | 0.1067             | 0.0368 | 0.0338 | 0.0059 | 0.0043 | 0.0087 |
| 2   | 0.40   | 0.5214             | 0.3793 | 0.0869 | 0.1520 | 0.0235 | 0.0648 |
| 3   | 0.60   | 0.1912             | 0.3715 | 0.0835 | 0.2546 | 0.0466 | 0.0648 |
| 4   | 0.80   | 0.1322             | 0.4283 | 0.0922 | 0.2936 | 0.0717 | 0.0388 |
| 5   | 1.00   | 0.0786             | 0.5151 | 0.0979 | 0.3063 | 0.0797 | 0.0210 |
| 6   | 1.20   | 0.0346             | 0.5847 | 0.1011 | 0.3190 | 0.0686 | 0.0125 |
| 7   | 1.40   | 0.0242             |        | 0.1162 | 0.3137 | 0.0506 | 0.0207 |
| 8   | 1.60   | 0.0351             | 0.6420 | 0.1285 | 0.3149 | 0.0379 | 0.0289 |
| 9   | 1.80   | 0.0278             | 0.6754 | 0.1247 | 0.3002 | 0.0278 | 0.0136 |
| 10  | 2.00   | 0.0226             | 0.4894 | 0.1351 | 0.2914 | 0.0250 | 0.0357 |
| 11  | 2.20   | 0.0318             | 0.2852 | 0.1428 | 0.2890 | 0.0205 | 0.0255 |
| 12  | 2.40   | 0.0236             | 0.4017 | 0.1314 | 0.2778 | 0.0249 | 0.0340 |
| 13  | 2.60   | 0.0260             | 0.5807 | 0.1340 | 0.2757 | 0.0191 | 0.0371 |
| 14  | 2.80   | 0.0259             | 0.3777 | 0.1344 | 0.2723 | 0.0058 | 0.0417 |
| 15  | 3.00   | 0.0248             | 0.3013 | 0.1413 | 0.2621 | 0.0198 | 0.0410 |
| 16  | 3.20   | 0.0344             | 0.4521 | 0.1301 | 0.2561 | 0.0040 | 0.0133 |
| 17  | 3.40   | 0.0247             | 0.4202 | 0.1339 | 0.2494 | 0.0253 | 0.0586 |
| 18  | 3.60   | 0.0277             | 0.5594 | 0.1328 | 0.2448 | 0.0105 | 0.0517 |
| 19  | 3.80   | 0.0276             | 0.4202 | 0.1315 | 0.2431 | 0.0200 | 0.0511 |
| 20  | 4.00   | 0.0328             | 0.4136 | 0.1317 | 0.2383 | 0.0176 | 0.0653 |
| 21  | 4.20   | 0.0250             | 0.4236 | 0.1314 | 0.2361 | 0.0266 | 0.0458 |
| 22  | 4.40   | 0.0256             | 0.4999 | 0.1320 | 0.2297 | 0.0242 | 0.0518 |



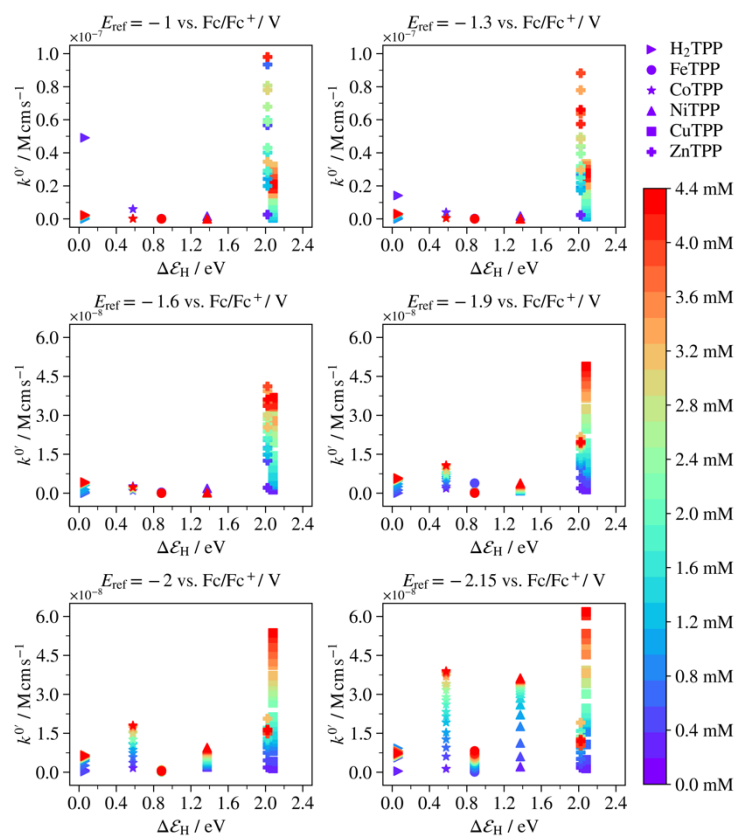

**Figure S36.** Reaction rates obtained from linear fits of the Tafel equation at various  $E_{\text{ref}}$ , as a function of binding energy. The colorbar indicates  $[\text{BzOH}]$ .

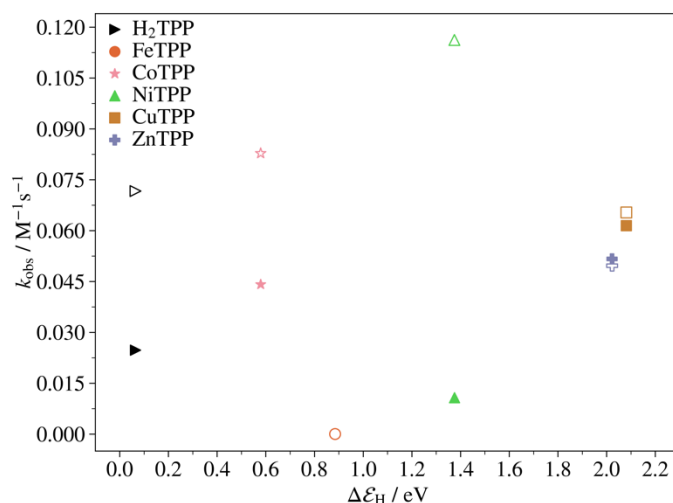

**Figure S37.** Rate constant  $k_{\text{obs}}$  calculated from the linear portion of the reaction rates obtained using the Tafel equation. Filled markers represent values obtained using  $E_{\text{ref}} = -2$  vs.  $\text{Fc}/\text{Fc}^+$  and empty markers represent values obtained using  $E_{\text{ref}} = -2.15$  V vs.  $\text{Fc}/\text{Fc}^+$ .

### 3.6 Reaction rates and reaction orders from current plateau analysis

Figure S38-S40 show observed rate constants (which may be more accurately described as reaction rates, as they are obtained from the increase in catalytic current with acid concentration) obtained from current plateau analysis. The plots include linear or second order fits that should reflect the reaction orders according to the current plateau model.

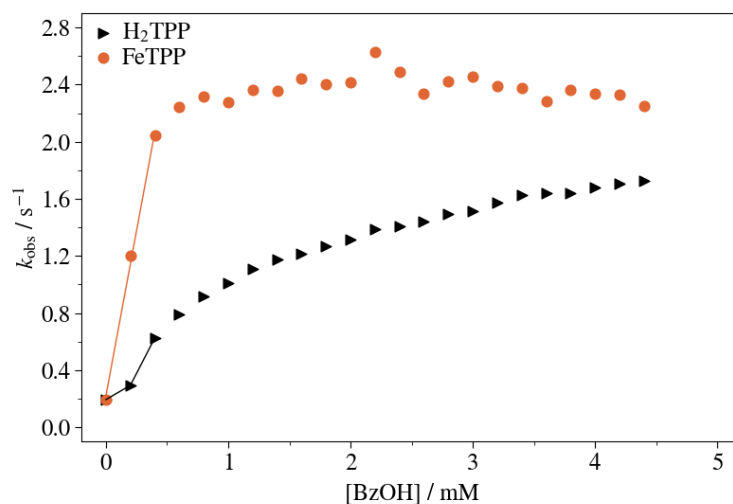

**Figure S38.** Observed rate constants and reaction order fits obtained from current plateau analysis for H<sub>2</sub>TPP and FeTPP.

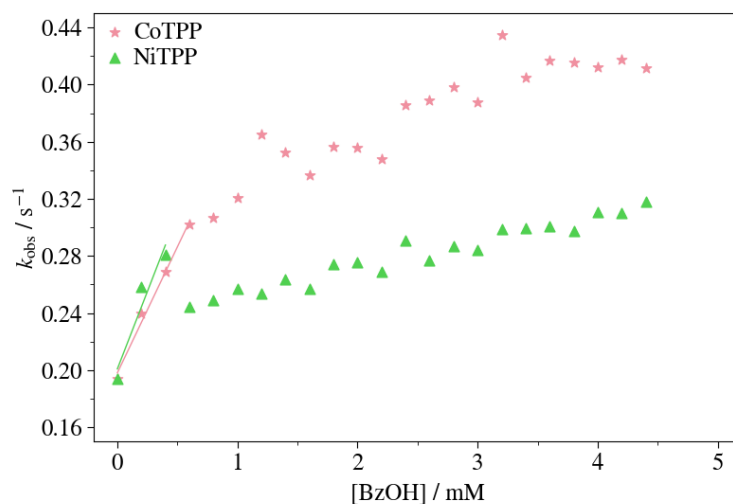

**Figure S39.** Observed rate constants and reaction order fits obtained from current plateau analysis for CoTPP and NiTPP.

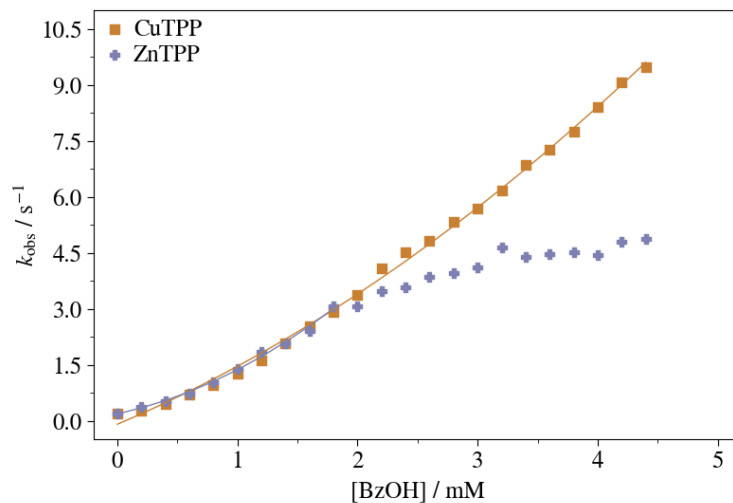

**Figure S40.** Observed rate constants and reaction order fits obtained from current plateau analysis for CuTPP and ZnTPP.

### 3.7 Reaction rates from FOWA analysis

Table S8-S10 show the cathodic peak potentials  $E_{p,c}$ , the inflection point potentials  $E_{\text{infl}}$ , and the potential at  $i = i_{\text{cat}}/2$  where  $i_{\text{cat}}$  is the peak current of the catalytic wave, respectively. These values were used as approximations of  $E_{\text{cat}/2}$ , in addition to the half-wave potential of the first porphyrin reduction involved in catalysis ( $L^0/L^{1-}$  for all porphyrins except FeTPP, for which the half-wave potential of the M(II)/M(I) transition was used).

**Table S8.** Cathodic peak potentials of the catalytic wave in the presence of increasing amounts of benzoic acid. Bold numbers mark the amount of acid at which the peak potential stabilizes after a notable change with acid concentration. The average is taken from the bold number until the last value. The last line shows the difference between the first value (0 equivalents) and the average (> 0 equivalents).

| Equivalents        | H <sub>2</sub> TPP | FeTPP          | CoTPP          | NiTPP          | CuTPP          | ZnTPP          |
|--------------------|--------------------|----------------|----------------|----------------|----------------|----------------|
| 0                  | -1.7003            | -1.6652        | -1.8464        | -1.8162        | -1.8380        | -1.8568        |
| 1                  | -1.6197            | -1.5794        | <b>-1.8519</b> | <b>-1.8162</b> | <b>-1.8380</b> | <b>-1.8565</b> |
| 2                  | -1.6395            | -1.5541        | -1.8565        | -1.8162        | -1.8432        | -1.8467        |
| 3                  | -1.6041            | -1.5388        |                | -1.8263        | -1.8432        | -1.8364        |
| 4                  | <b>-1.5992</b>     | -1.5294        |                | -1.8263        | -1.8380        | -1.8364        |
| 5                  | -1.5992            | <b>-1.5236</b> |                | -1.8205        | -1.8380        | -1.8315        |
| 6                  | -1.5992            | -1.5236        |                | -1.8263        | -1.8329        | -1.8373        |
| 7                  | -1.5992            | -1.5190        |                | -1.8205        | -1.8380        | -1.8370        |
| 8                  | -1.5992            | -1.5190        |                | -1.8263        | -1.8432        | -1.8370        |
| 9                  | -1.6041            | -1.5190        |                | -1.8263        | -1.8432        | -1.8415        |
| 10                 | -1.5992            | -1.5190        |                | -1.8205        | -1.8380        | -1.8412        |
| 11                 | -1.6041            | -1.5135        |                | -1.8205        |                | -1.8415        |
| 12                 | -1.5992            | -1.5135        |                | -1.8205        |                | -1.8367        |
| 13                 | -1.5992            | -1.5135        |                | -1.8205        |                | -1.8412        |
| 14                 | -1.5992            | -1.5135        |                | -1.8263        |                | -1.8415        |
| 15                 | -1.5992            | -1.5135        |                | -1.8263        |                | -1.8419        |
| 16                 | -1.5992            | -1.5135        |                | -1.8263        |                | -1.8415        |
| 17                 | -1.5992            | -1.5086        |                | -1.8263        |                | -1.8364        |
| 18                 | -1.5992            | -1.5086        |                | -1.8306        |                | -1.8370        |
| 19                 | -1.5992            | -1.5086        |                | -1.8263        |                | -1.8364        |
| 20                 | -1.5992            | -1.5086        |                | -1.8263        |                | -1.8364        |
| 21                 | -1.5940            | -1.5086        |                | -1.8263        |                | -1.8364        |
| 22                 | -1.5992            | -1.5086        |                | -1.8306        |                | -1.8367        |
| <b>Average:</b>    | -1.6024            | -1.5142        | -1.8542        | -1.8242        | -1.8396        | -1.8393        |
| <b>Difference:</b> | 0.0978             | 0.1510         | -0.0078        | -0.0080        | -0.0016        | 0.0175         |

**Table S9.** Inflection point potentials of the catalytic wave in the presence of increasing amounts of benzoic acid. Bold numbers mark the amount of acid at which the peak potential stabilizes after a notable change with acid concentration. The average is taken from the bold number until the last value. The last line shows the difference between the first value (0 equivalents) and the average (> 0 equivalents).

| Equivalents        | H <sub>2</sub> TPP | FeTPP          | CoTPP          | NiTPP          | CuTPP          | ZnTPP          |
|--------------------|--------------------|----------------|----------------|----------------|----------------|----------------|
| 0                  | -1.6447            | -1.6139        | -1.7958        | -1.7555        | -1.7874        | -1.7964        |
| 1                  | -1.5235            | -1.5138        | <b>-1.7912</b> | <b>-1.7604</b> | <b>-1.7822</b> | <b>-1.8010</b> |
| 2                  | -1.5336            | -1.4933        | -1.7955        | -1.7558        | -1.7825        | -1.7759        |
| 3                  | -1.5391            | -1.4936        | -1.7958        | -1.7552        | -1.7718        | -1.7704        |
| 4                  | <b>-1.5434</b>     | -1.4881        | -1.8010        | -1.7555        | -1.7672        | -1.7656        |
| 5                  | -1.5437            | <b>-1.4885</b> | -1.8016        | -1.7607        | -1.7624        | -1.7707        |
| 6                  | -1.5388            | -1.4881        | -1.8003        | -1.7555        | -1.7630        | -1.7710        |
| 7                  | -1.5437            | -1.4827        | -1.8010        | -1.7561        | -1.7627        | -1.7710        |
| 8                  | -1.5440            | -1.4885        | -1.8016        | -1.7610        | -1.7672        | -1.7704        |
| 9                  | -1.5391            | -1.4833        | -1.7958        | -1.7607        | -1.7624        | -1.7707        |
| 10                 | -1.5388            | -1.4833        | -1.8061        | -1.7604        | -1.7675        | -1.7750        |
| 11                 | -1.5385            | -1.4830        | -1.8016        | -1.7555        | -1.7624        | -1.7759        |
| 12                 | -1.5339            | -1.4833        | -1.8065        | -1.7506        | -1.7672        | -1.7759        |
| 13                 | -1.5336            | -1.4827        | -1.7967        | -1.7610        | -1.7627        | -1.7698        |
| 14                 | -1.5333            | -1.4836        | -1.8013        | -1.7552        | -1.7620        | -1.7762        |
| 15                 | -1.5336            | -1.4833        | -1.8013        | -1.7549        | -1.7624        | -1.7710        |
| 16                 | -1.5339            | -1.4781        | -1.8016        | -1.7558        | -1.7675        | -1.7759        |
| 17                 | -1.5339            | -1.4836        | -1.8013        | -1.7558        | -1.7675        | -1.7710        |
| 18                 | -1.5339            | -1.4781        | -1.8061        | -1.7604        | -1.7675        | -1.7659        |
| 19                 | -1.5336            | -1.4784        | -1.8061        | -1.7558        | -1.7566        | -1.7707        |
| 20                 | -1.5239            | -1.4787        | -1.8058        | -1.7555        | -1.7620        | -1.7704        |
| 21                 | -1.5287            | -1.4784        | -1.8013        | -1.7555        | -1.7669        | -1.7656        |
| 22                 | -1.5239            | -1.4784        | -1.8010        | -1.7610        | -1.7672        | -1.7659        |
| <b>Average:</b>    | -1.5356            | -1.4824        | -1.8009        | -1.7572        | -1.7664        | -1.7726        |
| <b>Difference:</b> | 0.1091             | 0.1315         | -0.0051        | -0.0017        | 0.0210         | 0.0238         |

**Table S10.** Potentials at  $i = i_{\text{cat}}/2$  of catalytic wave in the presence of increasing amounts of benzoic acid. Bold numbers mark the amount of acid at which the peak potential stabilizes after a notable change with acid concentration. The average is taken from the bold number until the last value. The last line shows the difference between the first value (0 equivalents) and the average (> 0 equivalents).

| Equivalents        | H <sub>2</sub> TPP | FeTPP          | CoTPP          | NiTPP          | CuTPP          | ZnTPP          |
|--------------------|--------------------|----------------|----------------|----------------|----------------|----------------|
| 0                  | -1.6298            | -1.5638        | -1.7659        | -1.7353        | -1.7572        | -1.7707        |
| 1                  | -1.5190            | -1.5031        | <b>-1.7662</b> | <b>-1.7198</b> | <b>-1.7572</b> | <b>-1.7656</b> |
| 2                  | -1.5232            | -1.4933        | -1.7607        | -1.7158        | -1.7523        | -1.7607        |
| 3                  | -1.5235            | -1.4885        | -1.7711        | -1.7302        | -1.7520        | -1.7555        |
| 4                  | <b>-1.5239</b>     | -1.4827        | -1.7711        | -1.7308        | -1.7523        | -1.7552        |
| 5                  | -1.5232            | <b>-1.4833</b> | -1.7711        | -1.7308        | -1.7523        | -1.7555        |
| 6                  | -1.5235            | -1.4781        | -1.7711        | -1.7305        | -1.7523        | -1.7558        |
| 7                  | -1.5239            | -1.4781        | -1.7707        | -1.7302        | -1.7474        | -1.7561        |
| 8                  | -1.5235            | -1.4781        | -1.7707        | -1.7305        | -1.7419        | -1.7558        |
| 9                  | -1.5232            | -1.4781        | -1.7759        | -1.7308        | -1.7419        | -1.7555        |
| 10                 | -1.5187            | -1.4784        | -1.7762        | -1.7308        | -1.7422        | -1.7561        |
| 11                 | -1.5187            | -1.4735        | -1.7704        | -1.7305        | -1.7367        | -1.7604        |
| 12                 | -1.5184            | -1.4732        | -1.7756        | -1.7302        | -1.7324        | -1.7610        |
| 13                 | -1.5190            | -1.4735        | -1.7762        | -1.7311        | -1.7321        | -1.7610        |
| 14                 | -1.5141            | -1.4732        | -1.7756        | -1.7305        | -1.7270        | -1.7561        |
| 15                 | -1.5132            | -1.4729        | -1.7759        | -1.7311        | -1.7266        | -1.7558        |
| 16                 | -1.5080            | -1.4732        | -1.7805        | -1.7305        | -1.7266        | -1.7610        |
| 17                 | -1.5086            | -1.4735        | -1.7808        | -1.7302        | -1.7270        | -1.7552        |
| 18                 | -1.5043            | -1.4729        | -1.7805        | -1.7305        | -1.7270        | -1.7558        |
| 19                 | -1.5034            | -1.4729        | -1.7805        | -1.7299        | -1.7221        | -1.7561        |
| 20                 | -1.4982            | -1.4680        | -1.7808        | -1.7305        | -1.7215        | -1.7555        |
| 21                 | -1.4982            | -1.4680        | -1.7808        | -1.7302        | -1.7221        | -1.7558        |
| 22                 | -1.4933            | -1.4683        | -1.7808        | -1.7302        | -1.7215        | -1.7555        |
| <b>Average:</b>    | -1.5135            | -1.4743        | -1.7747        | -1.7293        | -1.7370        | -1.7573        |
| <b>Difference:</b> | 0.1162             | 0.0896         | -0.0088        | 0.0060         | 0.0202         | 0.0134         |

### 3.7.1 FOWA using $E_{\text{cat}/2} \approx E_{1/2}^{0/1-}$

Figure S41 shows the FOWA plots of H<sub>2</sub>TPP, FeTPP, CoTPP, NiTPP, CuTPP and ZnTPP using  $E_{\text{cat}/2} \approx E_{1/2}^{0/1-}$ . Figure S42 shows linear fits at each concentration in the interval  $x = [0.002, 0.05]$ , and Figure S43 shows the corresponding observed rate constants. Figure S44 and Figure S45 show linear fits and observed rate constants, respectively, obtained from the interval  $x = [0.1, 0.2]$ .

Figure S46 and

Figure S47 show the observed rate constants obtained from the two intervals as functions of the binding energy of H.

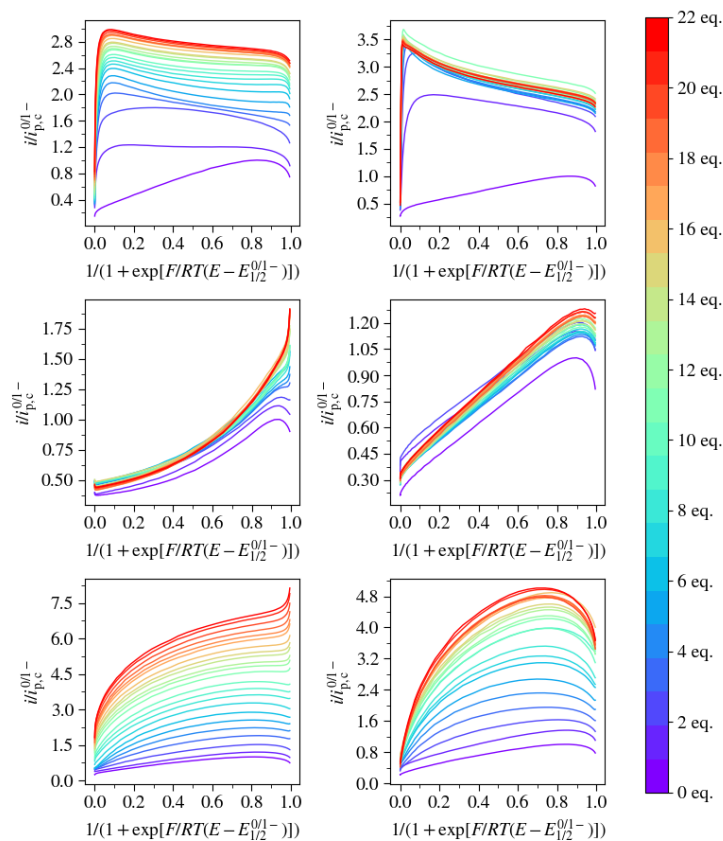

**Figure S41.** FOWA plot using  $E_{\text{cat}/2} \approx E_{1/2}^{0/1-}$  (the  $L^0/L^{1-}$  transition was used for all porphyrins except FeTPP, for which the  $M(\text{II})/M(\text{I})$  transition was used). From upper left to lower right:  $\text{H}_2\text{TPP}$ , FeTPP, CoTPP, NiTPP, CuTPP, ZnTPP.

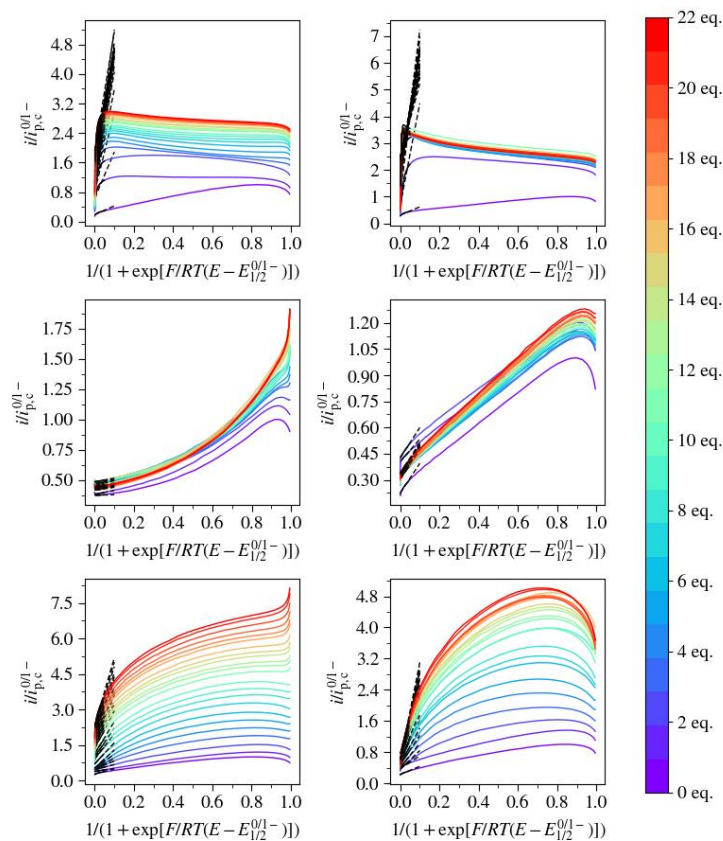

**Figure S42.** Linear fit of the FOWA plot in Figure S41 between  $\chi = 0.002$  and  $\chi = 0.05$ . From upper left to lower right: H<sub>2</sub>TPP, FeTPP, CoTPP, NiTPP, CuTPP, ZnTPP

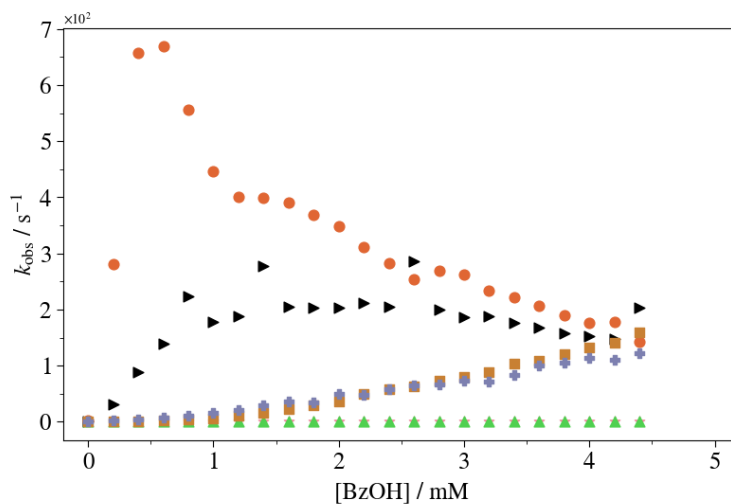

**Figure S43.**  $k_{\text{obs}}$  obtained from the fit in Figure S42.



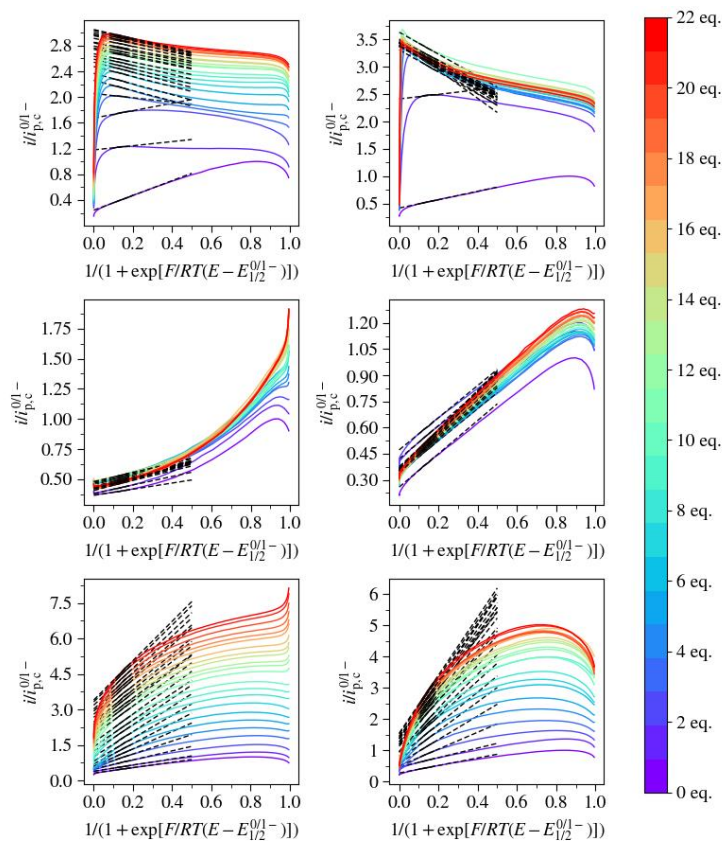

**Figure S44.** Linear fit of the FOWA plot in Figure S41 between  $x = 0.1$  and  $x = 0.2$ . From upper left to lower right: H<sub>2</sub>TPP, FeTPP, CoTPP, NiTPP, CuTPP, ZnTPP.

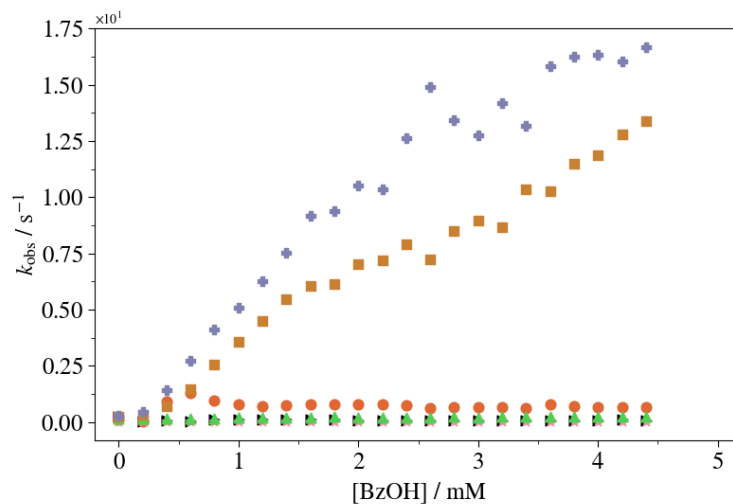

**Figure S45.**  $k_{\text{obs}}$  obtained from the fit in Figure S44.

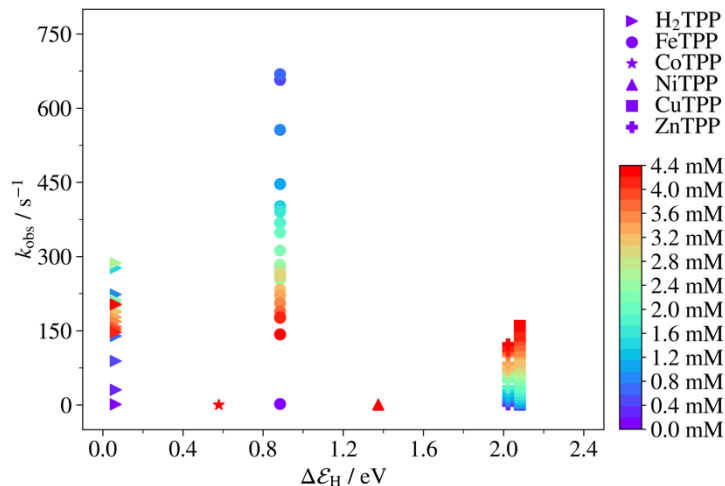

**Figure S46.**  $k_{\text{obs}}$  obtained from the interval  $x = [0.002, 0.05]$  using  $E_{\text{cat}/2} \approx E_{1/2}^{0/1-}$ .

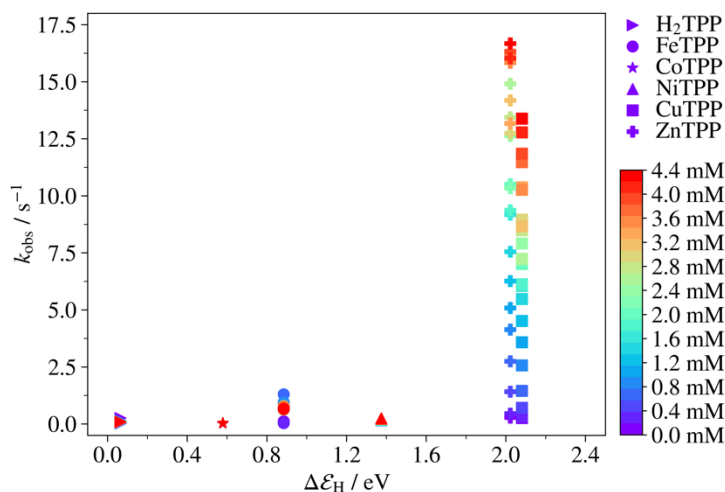

**Figure S47.**  $k_{\text{obs}}$  obtained from the interval  $x = [0.1, 0.2]$  using  $E_{\text{cat}/2} \approx E_{1/2}^{0/1-}$ .

### 3.7.2 FOWA using $E_{\text{cat}/2} \approx E_{\text{infl}}$

Figure S48 shows the FOWA plots of H<sub>2</sub>TPP, FeTPP, CoTPP, NiTPP, CuTPP and ZnTPP using  $E_{\text{cat}/2} \approx E_{\text{infl}}$ . Figure S49 shows linear fits at each concentration in the interval  $x = [0.002, 0.05]$ , and Figure S50 the corresponding observed rate constants. Figure S51 and Figure S52 show linear fits and observed rate constants, respectively, obtained from the interval  $x = [0.1, 0.2]$ . Figure S53 and Figure S54 show linear fits and observed rate constants, respectively, from the interval  $x =$

$[E_{\text{infl}} + 0.1, E_{\text{infl}} + 0.2]$ . Figure S55-S57 show the observed rate constants obtained from the three intervals as functions of the binding energy of H.

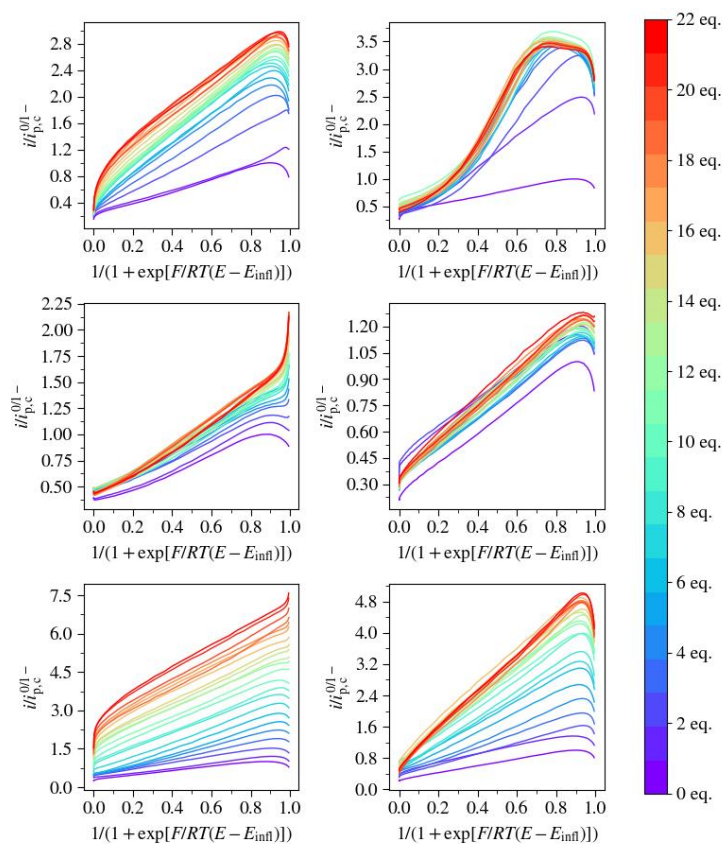

**Figure S48.** FOWA plot using  $E_{\text{cat}/2} \approx E_{\text{infl}}$  (the  $L^0/L^{1-}$  transition was used for all porphyrins except FeTPP, for which the M(II)/M(I) transition was used). From upper left to lower right:  $\text{H}_2\text{TPP}$ , FeTPP, CoTPP, NiTPP, CuTPP, ZnTPP.

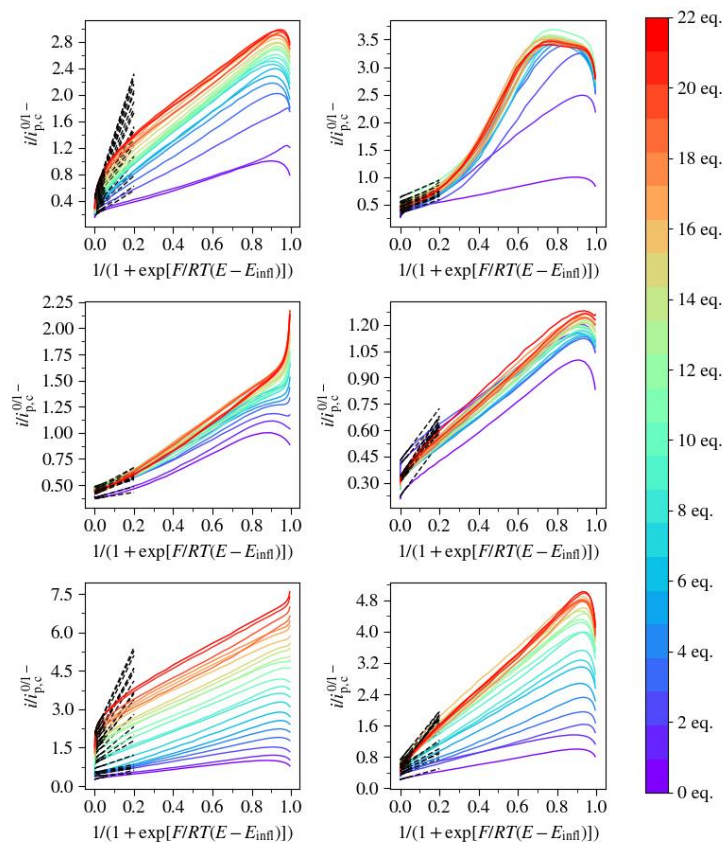

**Figure S49.** Linear fit of the FOWA plot in Figure S48 between  $\alpha = 0.002$  and  $\alpha = 0.05$ . From upper left to lower right: H<sub>2</sub>TPP, FeTPP, CoTPP, NiTPP, CuTPP, ZnTPP.

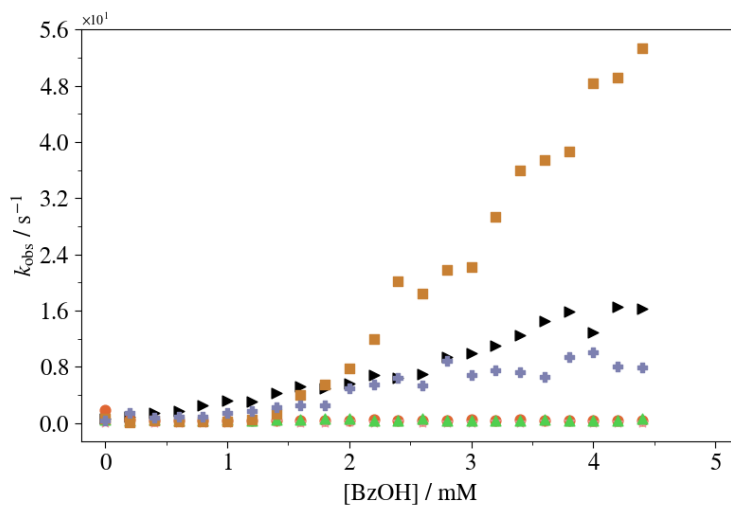

**Figure S50.**  $k_{obs}$  obtained from the fit in Figure S49.

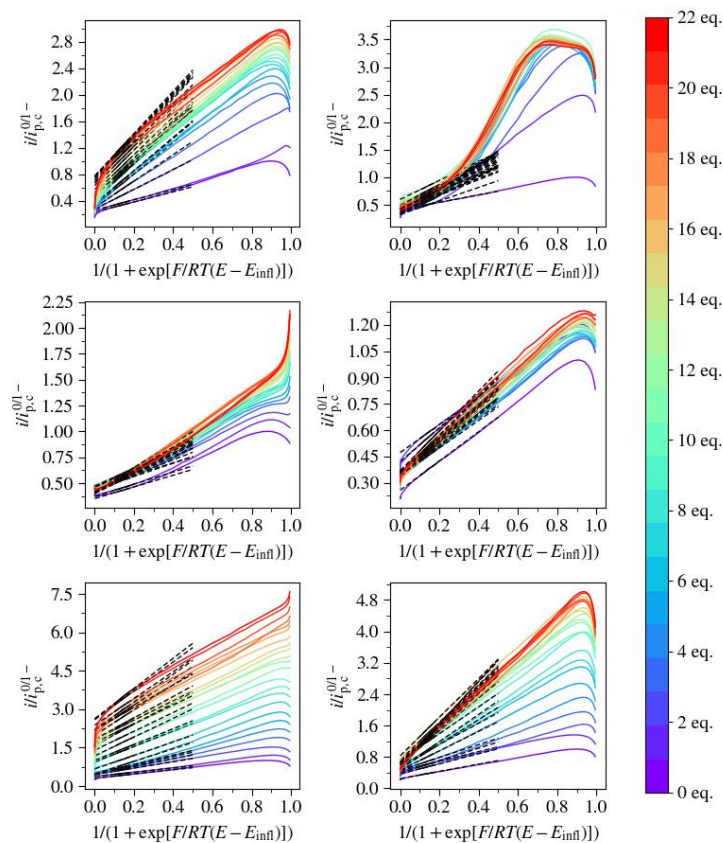

**Figure S51.** Linear fit of the FOWA plot in Figure S48 between  $\alpha = 0.1$  and  $\alpha = 0.2$ . From upper left to lower right: H<sub>2</sub>TPP, FeTPP, CoTPP, NiTPP, CuTPP, ZnTPP.

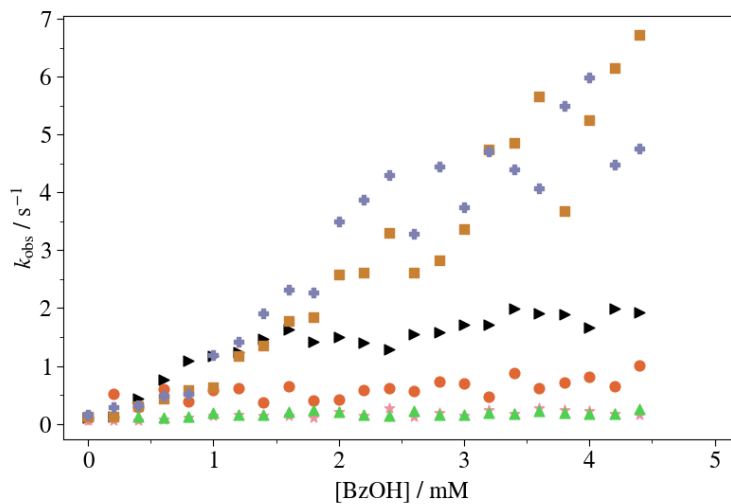

**Figure S52.**  $k_{\text{obs}}$  obtained from the fit in Figure S51.

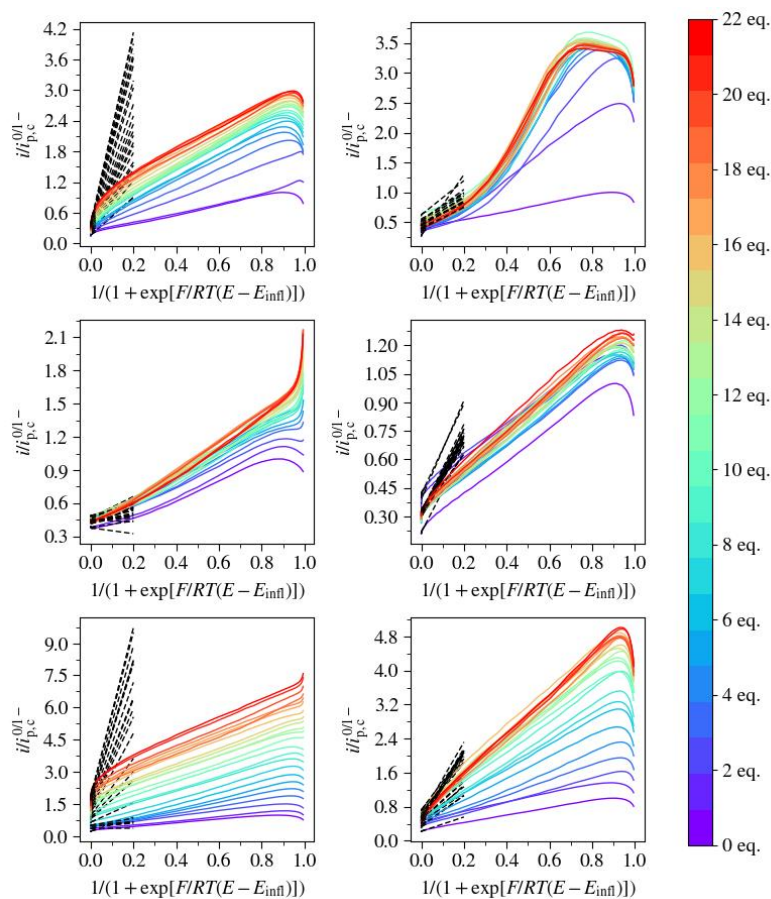

**Figure S53.** Linear fit of the FOWA plot in Figure S48 between  $x = E_{\text{infl}} + 0.1$  and  $x = E_{\text{infl}} + 0.2$ . From upper left to lower right: H<sub>2</sub>TPP, FeTPP, CoTPP, NiTPP, CuTPP, ZnTPP.

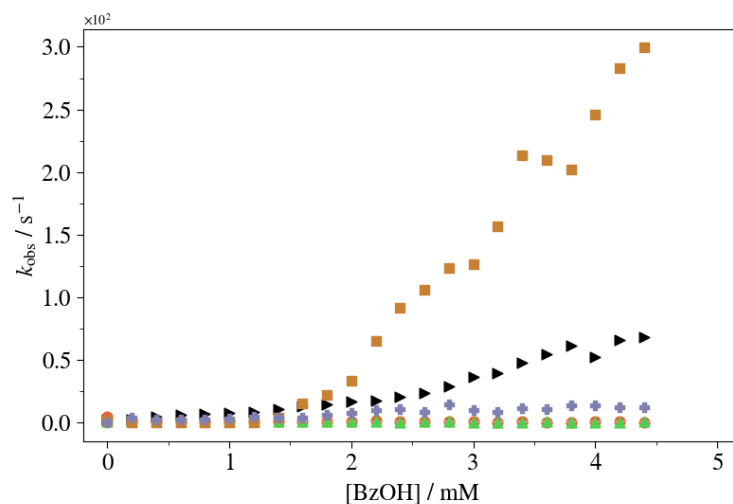

**Figure S54.**  $k_{\text{obs}}$  obtained from the fit in Figure S53.

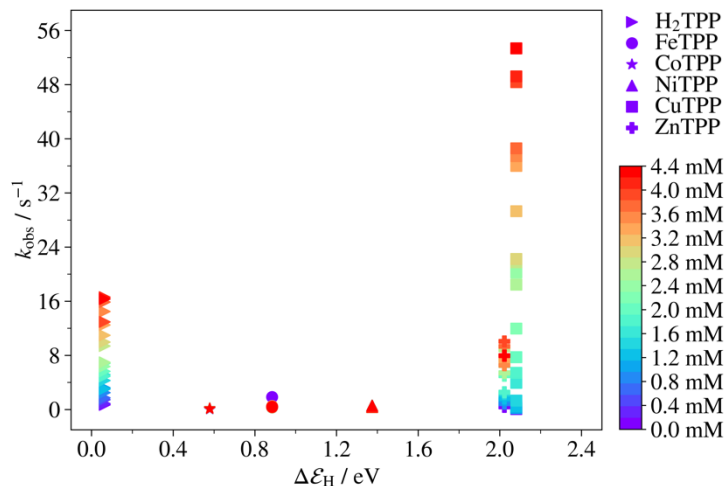

**Figure S55.**  $k_{\text{obs}}$  obtained from the interval  $x = [0.002, 0.05]$  using  $E_{\text{cat}/2} \approx E_{\text{infl}}$ .

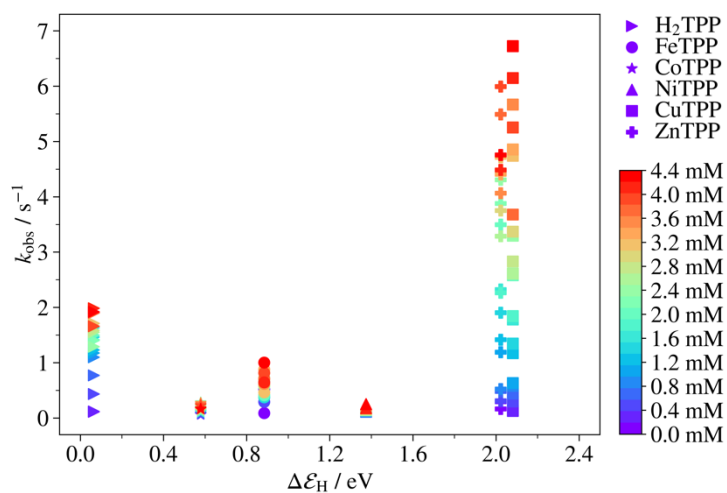

**Figure S56.**  $k_{\text{obs}}$  obtained from the interval  $x = [0.1, 0.2]$  using  $E_{\text{cat}/2} \approx E_{\text{infl}}$ .

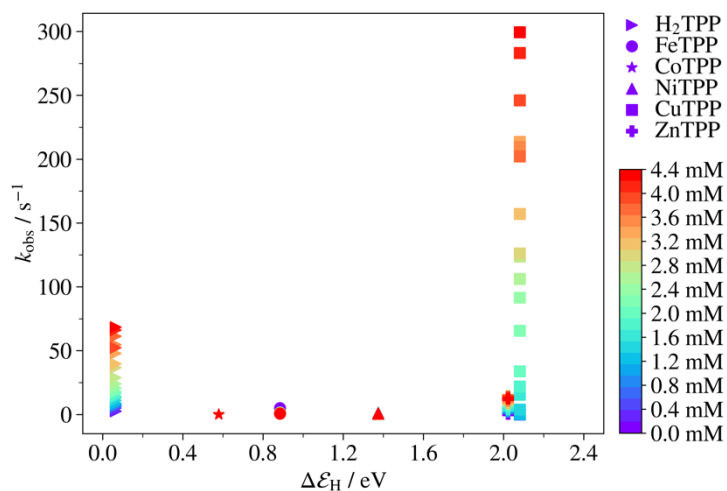

**Figure S57.**  $k_{\text{obs}}$  obtained from the interval  $x = [E_{\text{infl}} + 0.1, E_{\text{infl}} + 0.2]$  using  $E_{\text{cat}/2} \approx E_{\text{infl}}$ .



### 3.7.3 FOWA using $E_{cat/2} \approx E_{i_{cat/2}}$

Figure S58 shows the FOWA plots of H<sub>2</sub>TPP, FeTPP, CoTPP, NiTPP, CuTPP and ZnTPP using  $E_{cat/2} \approx E_{i_{cat/2}}$ . Figure S59 shows linear fits at each concentration in the interval  $x = [0.002, 0.05]$ , and Figure S60 the corresponding observed rate constants. Figure S61 and Figure S62 show linear fits and observed rate constants, respectively, obtained from the interval  $x = [0.1, 0.2]$ . Figure S63 and Figure S64 show linear fits and observed rate constants, respectively, obtained from the interval  $x = [E_{i_{cat/2}} + 0.1, E_{i_{cat/2}} + 0.2]$ . Figure S65-S67 show the observed rate constants obtained from the three intervals as functions of the binding energy of H.

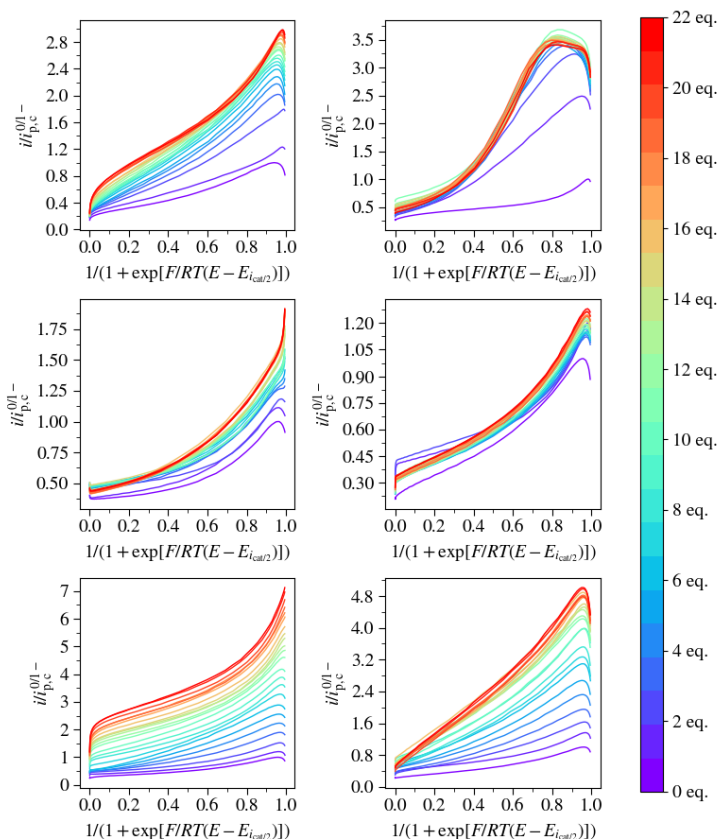

**Figure S58.** FOWA plot using  $E_{cat/2} \approx E_{infl}$  (the L<sup>0</sup>/L<sup>1-</sup> transition was used for all porphyrins except FeTPP, for which the M(II)/M(I) transition was used). From upper left to lower right: H<sub>2</sub>TPP, FeTPP, CoTPP, NiTPP, CuTPP, ZnTPP.



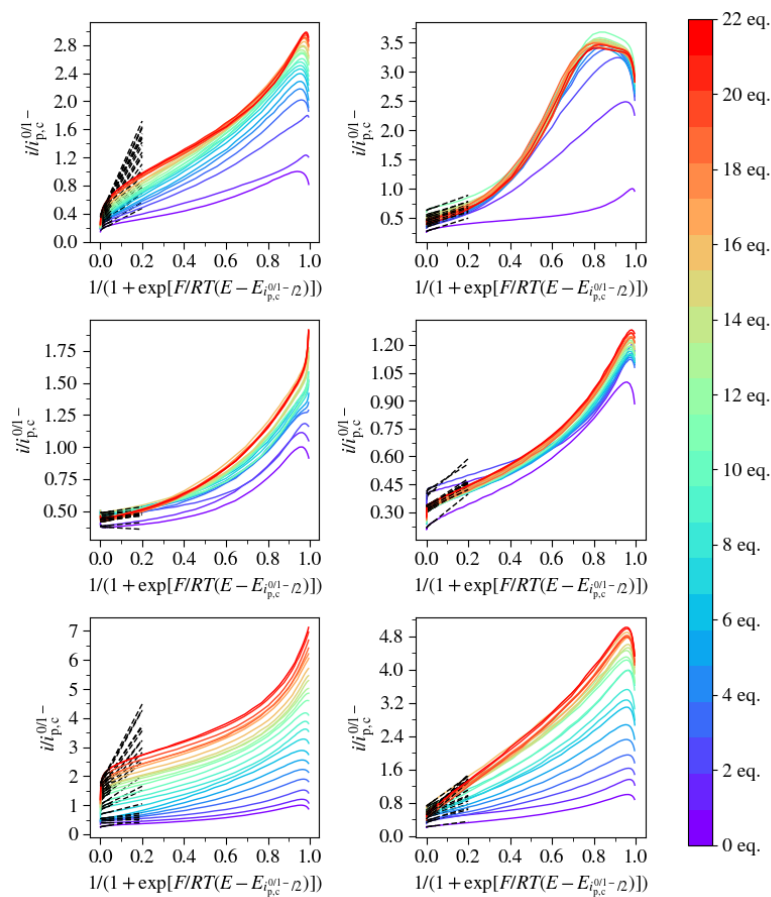

**Figure S59.** Linear fit of the FOWA plot in Figure S58 between  $\chi = 0.002$  and  $\chi = 0.05$ . From upper left to lower right: H<sub>2</sub>TPP, FeTPP, CoTPP, NiTPP, CuTPP, ZnTPP.

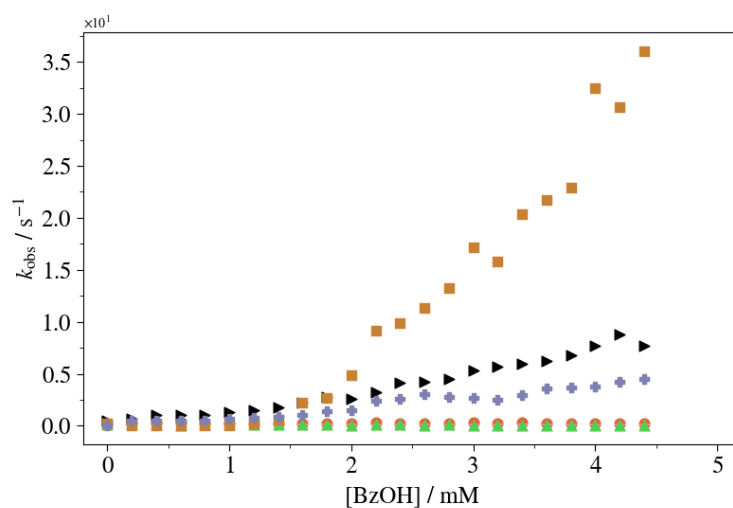

**Figure S60.**  $k_{obs}$  obtained from the fit in Figure S59.

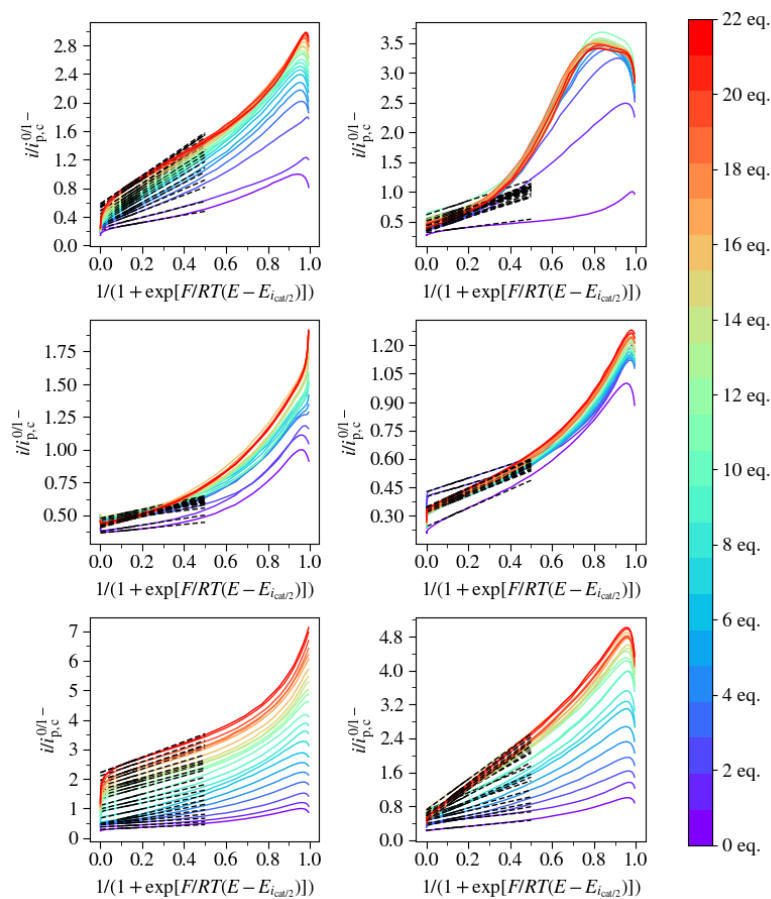

**Figure S61.** Linear fit of the FOWA plot in Figure S58 between  $\alpha = 0.1$  and  $\alpha = 0.2$ . From upper left to lower right: H<sub>2</sub>TPP, FeTPP, CoTPP, NiTPP, CuTPP, ZnTPP.

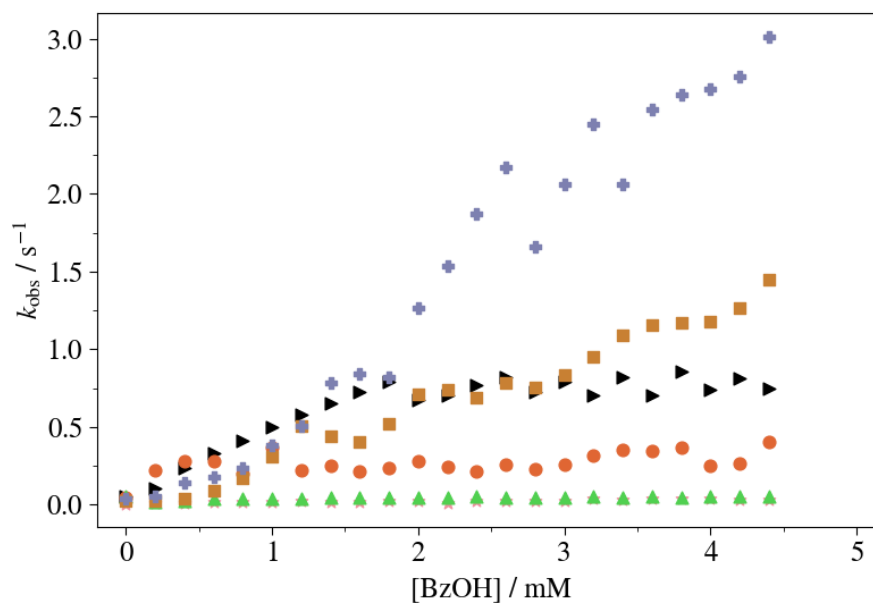

**Figure S62.**  $k_{obs}$  obtained from the fit in Figure S61.

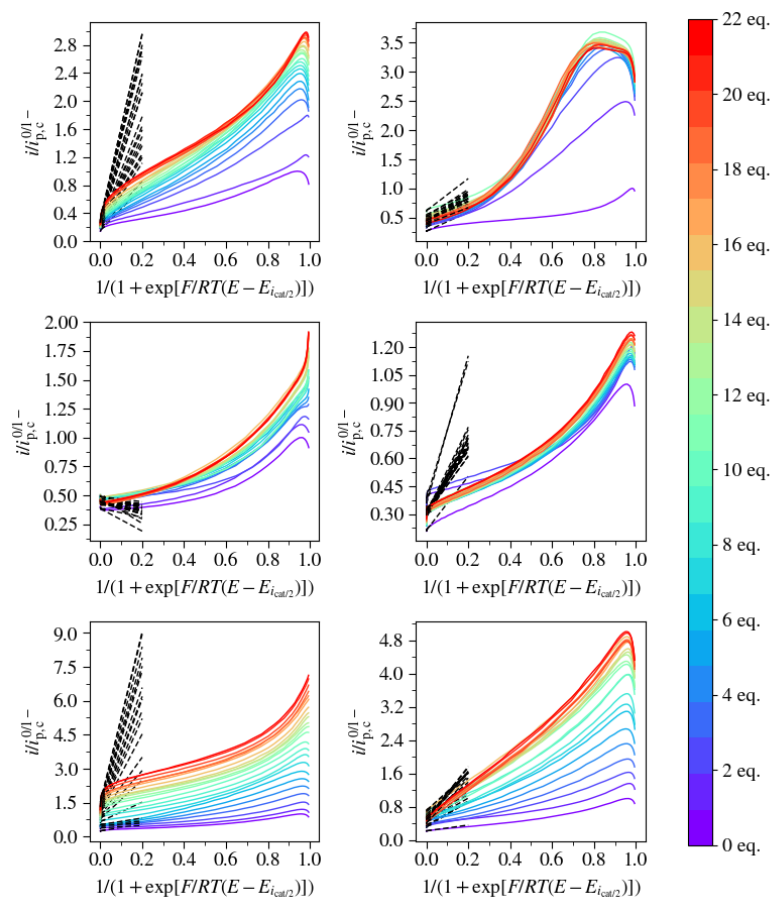

**Figure S63.** Linear fit of the FOWA plot in Figure S58 between  $x = E_{i_{cat/2}} + 0.1$  and  $x = E_{i_{cat/2}} + 0.2$ . From upper left to lower right: H<sub>2</sub>TPP, FeTPP, CoTPP, NiTPP, CuTPP, ZnTPP.

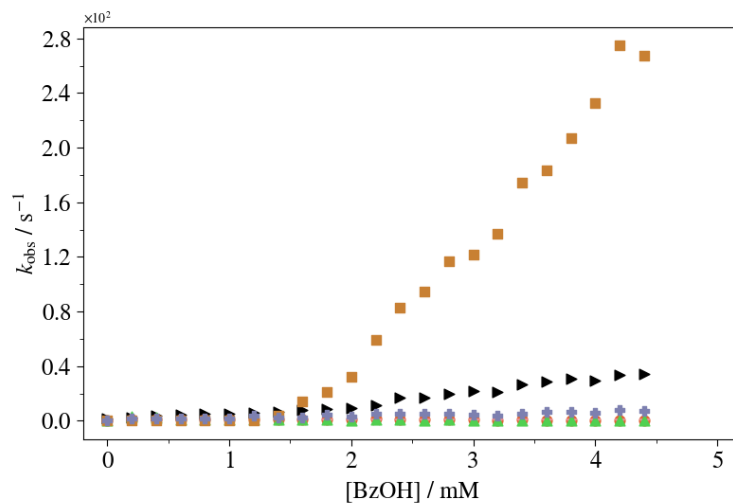

**Figure S64.**  $k_{obs}$  obtained from the fit in Figure S63.

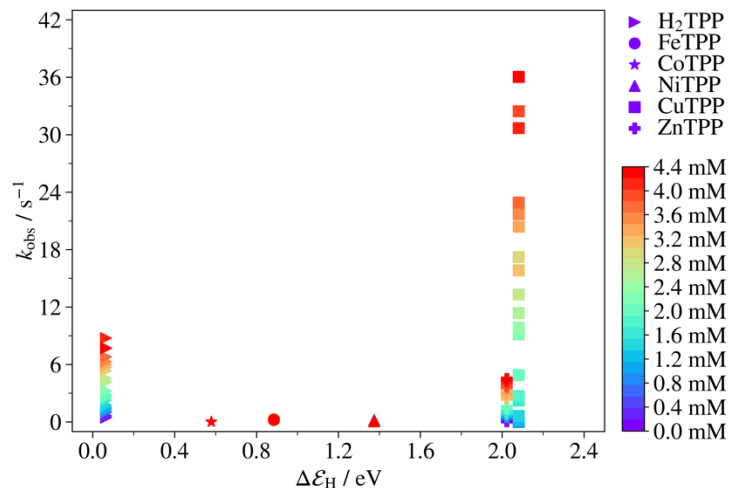

**Figure S65.**  $k_{\text{obs}}$  obtained from the interval  $x = 0.002$  and  $x = 0.05$  using  $E_{\text{cat}/2} \approx E_{i_{\text{cat}/2}}$ .

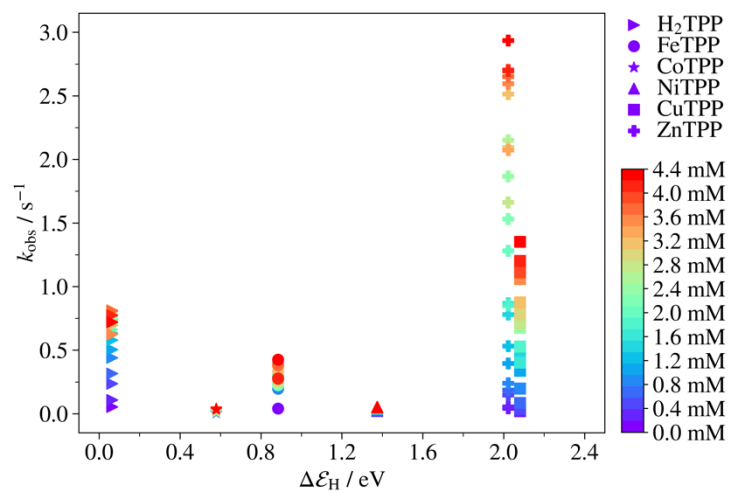

**Figure S66.**  $k_{\text{obs}}$  obtained from the interval  $x = [0.1, 0.2]$  using  $E_{\text{cat}/2} \approx E_{i_{\text{cat}/2}}$ .

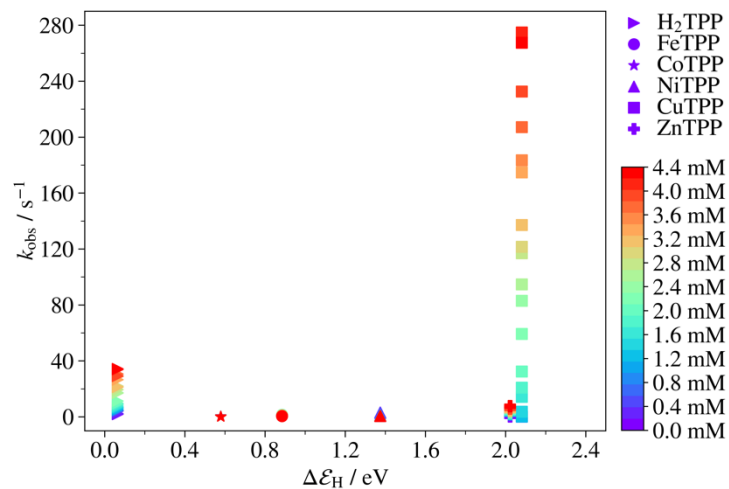

**Figure S67.**  $k_{\text{obs}}$  obtained from the interval  $x = [E_{i_{\text{cat}/2}} + 0.1, E_{i_{\text{cat}/2}} + 0.2]$  using  $E_{\text{cat}/2} \approx E_{i_{\text{cat}/2}}$ .

## References

- 1 R. Guillard, A. Zrineh, A. Tabard, A. Endo, B. Han, C. Lecomte, M. Souhassou, A. Habbou, M. Ferhat and K. Kadish, *Inorg. Chem.*, 1990, **29**, 4476–4482.
- 2 T. Kohshin, K. Horino, T. Komura and K. Murata, *Bull. Chem. Soc. Jpn.*, 1993, **66**, 733–738.
- 3 F. Zaar, S. Olsson, R. Emanuelsson, M. Strømme and M. Sjödin, *Electrochim. Acta*, 2022, **424**, 140616.
- 4 K. Kadish, X. Lin, J. Ding, Y. Wu and C. Araullo, *Inorg. Chem.*, 1986, **25**, 3236–3242.
- 5 A. Giraudeau, A. Louati, H. Callot and M. Gross, *Inorg. Chem.*, 1981, **20**, 769–772.
- 6 A. Antipas, D. Dolphin, M. Gouterman and E. Johnson, *J. Am. Chem. Soc.*, 1978, **100**, 7705–7709.
- 7 Y. Fang, F. Mandoj, L. Zeng, R. Pudi, M. Stefanelli, R. Paolesse and K. Kadish, *J. Porphyr. Phthalocyanines*, 2015, **19**, 1–10.
- 8 S. Jones and H. Po, *Inorganica Chim. Acta*, 1980, **42**, 95–99.
- 9 A. Stanienda and G. Biebl, *Z. Phys. Chem.*, 1967, **52**, 254–275.
- 10 K. Kadish and L. Shiue, *Inorg. Chem.*, 1982, **21**, 3623–3630.
- 11 R. Felton and H. Linschitz, *J. Am. Chem. Soc.*, 1966, **88**, 1113–1116.
- 12 L. Ye, Y. Fang, Z. Ou, S. Xue and K. Kadish, *Inorg. Chem.*, 2017, **56**, 13613–13626.
- 13 A. Wolberg, *Isr. J. Chem.*, 1974, **12**, 1031–1035.
- 14 A. Wolberg and J. Manassen, *J. Am. Chem. Soc.*, 1970, **92**, 2982–2991.
- 15 A. Giraudeau, H. Callot, J. Jordan, I. Ezhar and M. Gross, *J. Am. Chem. Soc.*, 1979, **101**, 3857–3862.
- 16 L. Truxillo and D. Davis, *Anal. Chem.*, 1975, **47**, 2260–2267.
- 17 A. Wahab, M. Bhattacharya, S. Ghosh, A. Samuelson and P. Das, *J. Phys. Chem. B*, 2008, **112**, 2842–2847.
- 18 D. Guldi, P. Hambright, D. Lexa, P. Neta and J.-M. Savéant, *J. Phys. Chem.*, 1992, **96**, 4459–4466.
- 19 C. Newton and D. Davis, *J. Magn. Reson.*, 1975, **20**, 446–457.
- 20 L. Bottomley and K. Kadish, *Inorg. Chem.*, 1983, **22**, 342–349.
- 21 S. Cheung, C. Grimes, J. Wong and C. Reed, *J. Am. Chem. Soc.*, 1976, **98**, 5028–5030.
- 22 Y. Murakami, Y. Matsuda and S. Yamada, *J. Chem. Soc., Dalton Trans.*, 1981, 855–861.
- 23 A. Giraudeau, H. Callot and M. Gross, *Inorg. Chem.*, 1979, **18**, 201–206.
- 24 H. Callat, A. Giraudeau and M. Gross, *J. Chem. Soc., Perkin Trans. 2*, 1975, 1321–1324.
- 25 K. Kadish, G. Larson, D. Lexa and M. Momenteau, *J. Am. Chem. Soc.*, 1975, **97**, 282–288.
- 26 R. Felton and G. Owen, *Ann. N. Y. Acad. Sci.*, 1973, **206**, 506–515.

- 27 K. Kadish, M. Morrison, L. Constant, L. Dickens and D. Davis, *J. Am. Chem. Soc.*, 1976, **98**, 8387–8390.
- 28 M. Autret, Z. Ou, A. Antonini, T. Boschi, P. Tagliatesta and K. Kadish, *J. Chem. Soc., Dalton Trans.*, 1996, 2793–2787.
- 29 K. Kadish, J.-L. Cornillon, A. Coutsolelos and R. Guillard, *Inorg. Chem.*, 1987, **26**, 4167–4173.
- 30 G. Brown, F. Hopf, J. Ferguson, T. Meyer and D. Whitten, *J. Am. Chem. Soc.*, 1973, **95**, 5939–5942.
- 31 C. Paliteiro and A. Sobral, *Electrochim. Acta*, 2005, **50**, 2445–2451.
- 32 Y. Fang, P. Bhyrappa, Z. Ou and K. Kadish, *Chem. Eur. J.*, 2014, **20**, 524–532.
- 33 H. Kageyama, M. Hidai and Y. Uchida, *Bull. Chem. Soc. Jpn.*, 1972, **45**, 2898–2902.
- 34 S. Schmidt and G. Schuster, *J. Am. Chem. Soc.*, 1980, **102**, 7100–7103.
- 35 A. Ghosh, S. Mobin, R. Fröhlich, R. Butcher, D. Maity and M. Ravikanth, *Inorg. Chem.*, 2010, **49**, 8287–8297.
- 36 M. Perrée-Fauvet, A. Gaudemer, J. Bonvoisin, J. Girerd, C. Boucly-Goester and P. Boucly, *Inorg. Chem.*, 1989, **28**, 3533–3538.
- 37 Y. Fang, L. Wang, W. Xu, Z. Ou, M. Chen, L. Cong, W. Shan, X. Ke and K. Kadish, *Inorg. Chem.*, 2019, **58**, 2576–2587.
- 38 S. Kelly and K. Kadish, *Inorg. Chem.*, 1984, **23**, 679–687.
- 39 X. Jiang, C. Gros, Y. Chang, N. Desbois, L. Zeng, Y. Cui and K. Kadish, *Inorg. Chem.*, 2017, **56**, 8045–8057.
- 40 D. Dolphin, T. Niem, R. Felton and I. Fujita, *J. Am. Chem. Soc.*, 1975, **97**, 5288–5290.
- 41 D. Chang, T. Malinski, A. Ulman and K. Kadish, *Inorg. Chem.*, 1984, **23**, 817–824.
- 42 Y. Fang, X. Jiang, Z. Ou, C. Michelin, N. Desbois, C. Gros and K. Kadish, *J. Porphyr. Phthalocyanines*, 2014, **18**, 832–841.
- 43 J. Schneider, K. Vuong, J. Calladine, X. Sun, A. Whitwood, M. George and R. Perutz, *Inorg. Chem.*, 2011, **50**, 11877–11889.
- 44 T. Malinski, D. Chang, J.-M. Latour, J.-C. Marchon, M. Gross, A. Giraudeau and K. Kadish, *Inorg. Chem.*, 1984, **23**, 3947–3955.
- 45 D. Clack and N. Hush, *J. Am. Chem. Soc.*, 1965, **87**, 4238–4242.
- 46 Q. Wang, X. Zhao, J. Zhang and X. Zhang, *J. Electroanal. Chem.*, 2015, **755**, 210–214.
- 47 V. Birss, K. Dang, J. E. Wong and R. P. C. Wong, *J. Electroanal. Chem.*, 2003, **550–551**, 67–79.
- 48 T. Nam, S. Son, B. Koo, H. V. Hoa Tran, J. R. Kim, Y. Choi and S. P. Jung, *Int. J. Hydrog. Energy*, 2017, **42**, 27677–27684.

# Appendix 1

This appendix contains all optimized geometries used in this study, with the porphyrins listed in alphabetical order.

| <b>AgTPP, total charge 0</b> |                |          |          |                |          |          |               |          |          |
|------------------------------|----------------|----------|----------|----------------|----------|----------|---------------|----------|----------|
|                              | <b>Doublet</b> |          |          | <b>Quartet</b> |          |          | <b>Sextet</b> |          |          |
| N                            | -1.49758       | 1.48755  | -0.00563 | -0.13235       | 2.11823  | -0.02921 | 2.12553       | 0.00000  | -0.07141 |
| N                            | 1.48634        | 1.49729  | -0.04758 | 2.12382        | 0.13277  | -0.06196 | 0.00000       | -2.12584 | 0.00000  |
| N                            | 1.49568        | -1.48794 | 0.04763  | 0.13047        | -2.11602 | 0.04485  | -2.12553      | 0.00000  | 0.07141  |
| N                            | -1.48824       | -1.49688 | 0.00567  | -2.12440       | -0.12998 | 0.02074  | 0.00000       | 2.12584  | 0.00000  |
| C                            | -2.84788       | 1.25481  | -0.02237 | -1.29319       | 2.84940  | -0.04293 | 2.92402       | 1.11675  | -0.00400 |
| C                            | -3.52629       | 2.53767  | -0.04603 | -0.96073       | 4.23502  | -0.06342 | 4.30094       | 0.68618  | 0.10661  |
| C                            | -2.56404       | 3.50742  | -0.05253 | 0.42586        | 4.32144  | -0.07196 | 4.30094       | -0.68617 | 0.10661  |
| C                            | -1.27539       | 2.83963  | -0.01732 | 0.92849        | 2.98824  | -0.03573 | 2.92402       | -1.11674 | -0.00400 |
| C                            | -0.01339       | 3.47900  | 0.00434  | 2.32238        | 2.60531  | -0.00310 | 2.47447       | -2.47511 | 0.00386  |
| C                            | 1.25254        | 2.84623  | 0.01701  | 2.84758        | 1.29826  | 0.00745  | 1.11704       | -2.92665 | 0.00148  |
| C                            | 2.53246        | 3.52049  | 0.13271  | 4.25332        | 0.94964  | 0.14032  | 0.68615       | -4.30794 | -0.00719 |
| C                            | 3.50191        | 2.55787  | 0.13360  | 4.33873        | -0.41081 | 0.14157  | -0.68613      | -4.30794 | 0.00720  |
| C                            | 2.83682        | 1.27295  | 0.01843  | 2.98772        | -0.93303 | 0.00757  | -1.11703      | -2.92666 | -0.00147 |
| C                            | 3.47748        | 0.01089  | -0.00001 | 2.62801        | -2.29514 | -0.01324 | -2.47446      | -2.47512 | -0.00386 |
| C                            | 2.84472        | -1.25515 | -0.01842 | 1.28948        | -2.84368 | -0.05201 | -2.92402      | -1.11675 | 0.00399  |
| C                            | 3.51785        | -2.53587 | -0.13360 | 0.95454        | -4.21920 | -0.21255 | -4.30094      | -0.68618 | -0.10663 |
| C                            | 2.55446        | -3.50455 | -0.13263 | -0.43244       | -4.30474 | -0.20496 | -4.30094      | 0.68617  | -0.10663 |
| C                            | 1.27033        | -2.83832 | -0.01693 | -0.93190       | -2.98042 | -0.04099 | -2.92402      | 1.11674  | 0.00399  |
| C                            | 0.00839        | -3.47900 | -0.00425 | -2.32688       | -2.60041 | -0.00548 | -2.47447      | 2.47511  | -0.00386 |
| C                            | -1.25759       | -2.84754 | 0.01737  | -2.85288       | -1.29437 | 0.02739  | -1.11704      | 2.92665  | -0.00147 |
| C                            | -2.54203       | -3.52337 | 0.05263  | -4.26397       | -0.94317 | 0.07217  | -0.68614      | 4.30794  | 0.00721  |
| C                            | -3.51034       | -2.55967 | 0.04601  | -4.34726       | 0.41732  | 0.06336  | 0.68613       | 4.30794  | -0.00719 |
| C                            | -2.83997       | -1.27259 | 0.02236  | -2.98915       | 0.93733  | 0.03678  | 1.11703       | 2.92666  | 0.00147  |
| C                            | -3.47855       | -0.01088 | -0.00002 | -2.62856       | 2.29750  | -0.00258 | 2.47446       | 2.47512  | 0.00386  |
| H                            | -4.59775       | 2.67544  | -0.05640 | -1.66386       | 5.05450  | -0.06409 | 5.15408       | 1.34161  | 0.19852  |
| H                            | -2.71105       | 4.57721  | -0.08066 | 1.02105        | 5.22179  | -0.10162 | 5.15408       | -1.34160 | 0.19852  |
| H                            | 2.66811        | 4.58855  | 0.22139  | 5.06341        | 1.65639  | 0.24380  | 1.34071       | -5.16640 | -0.02207 |
| H                            | 4.56867        | 2.70146  | 0.22485  | 5.23088        | -1.00988 | 0.24876  | -1.34069      | -5.16640 | 0.02210  |
| H                            | 4.58548        | -2.67278 | -0.22488 | 1.65597        | -5.03105 | -0.33463 | -5.15407      | -1.34161 | -0.19855 |
| H                            | 2.69680        | -4.57174 | -0.22131 | -1.03041       | -5.19641 | -0.32079 | -5.15408      | 1.34160  | -0.19855 |
| H                            | -2.68235       | -4.59407 | 0.08082  | -5.08128       | -1.64821 | 0.10610  | -1.34070      | 5.16640  | 0.02210  |
| H                            | -4.58091       | -2.70414 | 0.05636  | -5.24452       | 1.01842  | 0.07032  | 1.34069       | 5.16640  | -0.02207 |
| C                            | 4.97428        | 0.01556  | -0.00007 | 3.73937        | -3.28829 | -0.00068 | -3.53204      | -3.52579 | -0.03190 |
| C                            | 5.69201        | -0.48941 | 1.09622  | 3.86816        | -4.20296 | 1.05929  | -4.41421      | -3.68203 | 1.05105  |
| C                            | 5.68878        | 0.52493  | -1.09643 | 4.67610        | -3.33244 | -1.04737 | -3.67236      | -4.37682 | -1.14159 |
| C                            | 7.08911        | -0.48393 | 1.09768  | 4.91503        | -5.12592 | 1.07903  | -5.40653      | -4.66478 | 1.02741  |
| H                            | 5.14614        | -0.88125 | 1.94957  | 3.14587        | -4.17775 | 1.86950  | -4.31171      | -3.03043 | -1.91399 |
| C                            | 7.08589        | 0.52802  | -1.09805 | 5.71651        | -4.26445 | -1.03370 | -4.66781      | -5.35632 | -1.16846 |
| H                            | 5.14042        | 0.91340  | -1.94973 | 4.57629        | -2.63731 | -1.87566 | -2.99945      | -4.25941 | -1.98603 |
| C                            | 7.79062        | 0.02419  | -0.00023 | 5.84161        | -5.16169 | 0.03117  | -5.53750      | -5.50476 | -0.08319 |
| H                            | 7.62833        | -0.87340 | 1.95670  | 5.00729        | -5.81700 | 1.91213  | -6.07466      | -4.77573 | 1.87692  |
| H                            | 7.62262        | 0.92078  | -1.95713 | 6.42650        | -4.29036 | -1.85554 | -4.76597      | -6.00021 | -2.03801 |
| H                            | 8.87690        | 0.02752  | -0.00028 | 6.65272        | -5.88410 | 0.04416  | -6.31044      | -6.26772 | -0.10297 |
| C                            | -0.01526       | 4.97641  | 0.02844  | 3.30802        | 3.72483  | 0.03530  | 3.53205       | -3.52578 | 0.03190  |
| C                            | -0.47900       | 5.67466  | 1.15474  | 3.36277        | 4.59322  | 1.13883  | 3.67238       | -4.37680 | 1.14159  |
| C                            | 0.45070        | 5.70905  | -1.07482 | 4.19990        | 3.92930  | -1.03054 | 4.41421       | -3.68203 | -1.05106 |
| C                            | -0.47691       | 7.07169  | 1.17812  | 4.29445        | 5.63219  | 1.17994  | 4.66783       | -5.35629 | 1.16846  |
| H                            | -0.83647       | 5.11416  | 2.01373  | 2.67511        | 4.44214  | 1.96540  | 2.99948       | -4.25938 | 1.98604  |
| C                            | 0.45092        | 7.10616  | -1.05422 | 5.12482        | 4.97573  | -0.99429 | 5.40653       | -4.66478 | -1.02742 |
| H                            | 0.80889        | 5.17518  | -1.95034 | 4.15765        | 3.26661  | -1.88990 | 4.31169       | -3.03044 | -1.91400 |
| C                            | -0.01254       | 7.79190  | 0.07297  | 5.17701        | 5.82858  | 0.11229  | 5.53752       | -5.50474 | 0.08319  |
| H                            | -0.83471       | 7.59613  | 2.05976  | 4.33142        | 6.28760  | 2.04554  | 4.76601       | -6.00018 | 2.03803  |
| H                            | 0.81049        | 7.65757  | -1.91853 | 5.80228        | 5.12438  | -1.83045 | 6.07465       | -4.77573 | -1.87694 |
| H                            | -0.01158       | 8.87805  | 0.09015  | 5.89839        | 6.64014  | 0.14267  | 6.31046       | -6.26770 | 0.10297  |
| C                            | -4.97744       | -0.01556 | -0.00010 | -3.74388       | 3.29042  | 0.00059  | 3.53204       | 3.52579  | 0.03190  |
| C                            | -5.69080       | -0.35868 | 1.15873  | -4.55701       | 3.45074  | 1.13410  | 3.67237       | 4.37681  | 1.14159  |

|    |          |          |          |          |          |          |          |         |          |
|----|----------|----------|----------|----------|----------|----------|----------|---------|----------|
| C  | -5.69281 | 0.32312  | -1.15900 | -3.99590 | 4.08296  | -1.13143 | 4.41420  | 3.68204 | -1.05106 |
| C  | -7.08829 | -0.36288 | 1.15968  | -5.60035 | 4.38010  | 1.13532  | 4.66782  | 5.35630 | 1.16846  |
| H  | -5.14257 | -0.61894 | 2.05968  | -4.36183 | 2.84663  | 2.01531  | 2.99947  | 4.25939 | 1.98604  |
| C  | -7.09030 | 0.31864  | -1.16008 | -5.04430 | 5.00540  | -1.13344 | 5.40652  | 4.66479 | -1.02742 |
| H  | -5.14612 | 0.58681  | -2.05989 | -3.36824 | 3.96608  | -2.00984 | 4.31169  | 3.03045 | -1.91400 |
| C  | -7.79221 | -0.02431 | -0.00023 | -5.84884 | 5.15827  | 0.00071  | 5.53750  | 5.50476 | 0.08319  |
| H  | -7.62559 | -0.62779 | 2.06605  | -6.21659 | 4.49614  | 2.02246  | 4.76599  | 6.00019 | 2.03802  |
| H  | -7.62916 | 0.58022  | -2.06649 | -5.23259 | 5.60391  | -2.02032 | 6.07464  | 4.77574 | -1.87694 |
| H  | -8.87849 | -0.02769 | -0.00028 | -6.66174 | 5.87878  | 0.00015  | 6.31044  | 6.26771 | 0.10297  |
| C  | 0.01589  | -4.97640 | -0.02830 | -3.30618 | -3.72561 | -0.02631 | -3.53205 | 3.52578 | -0.03190 |
| C  | 0.48625  | -5.70608 | 1.07505  | -3.36370 | -4.63857 | 1.04061  | -4.41422 | 3.68202 | 1.05105  |
| C  | -0.44339 | -5.67756 | -1.15462 | -4.18075 | -3.89902 | -1.11188 | -3.67237 | 4.37681 | -1.14159 |
| C  | 0.49507  | -7.10317 | 1.05454  | -4.28386 | -5.68841 | 1.02906  | -5.40654 | 4.66477 | 1.02742  |
| H  | 0.84101  | -5.16997 | 1.95059  | -2.68620 | -4.51402 | 1.87996  | -4.31171 | 3.03042 | 1.91399  |
| C  | -0.43269 | -7.07455 | -1.17791 | -5.09383 | -4.95627 | -1.12866 | -4.66782 | 5.35630 | -1.16845 |
| H  | -0.80422 | -5.11933 | -2.01368 | -4.13331 | -3.20477 | -1.94561 | -2.99947 | 4.25940 | -1.98603 |
| C  | 0.03597  | -7.79183 | -0.07266 | -5.15079 | -5.85209 | -0.05680 | -5.53752 | 5.50474 | -0.08319 |
| H  | 0.85793  | -7.65230 | 1.91892  | -4.32337 | -6.37851 | 1.86715  | -6.07467 | 4.77571 | 1.87693  |
| H  | -0.78715 | -7.60124 | -2.05956 | -5.75766 | -5.08039 | -1.97962 | -4.76599 | 6.00020 | -2.03801 |
| H  | 0.04364  | -8.87795 | -0.08978 | -5.86298 | -6.67221 | -0.06788 | -6.31046 | 6.26770 | -0.10297 |
| Ag | -0.00070 | 0.00000  | 0.00002  | -0.00052 | 0.00128  | -0.00279 | 0.00000  | 0.00000 | 0.00000  |

### AgTPP, total charge 1

|   | Singlet  |          |          | Triplet  |          |          | Quintet  |          |          |
|---|----------|----------|----------|----------|----------|----------|----------|----------|----------|
| N | 0.00026  | -2.08926 | 0.11632  | 2.11562  | -0.00001 | -0.10204 | 0.32267  | -2.09213 | -0.03648 |
| N | -2.08922 | -0.00026 | -0.11601 | -2.11562 | 0.00001  | 0.10204  | -2.09389 | -0.32337 | -0.06685 |
| N | -0.00026 | 2.08926  | 0.11632  | -0.00001 | -2.11559 | 0.00000  | -0.32015 | 2.08957  | 0.06155  |
| N | 2.08922  | 0.00026  | -0.11601 | 0.00001  | 2.11559  | 0.00000  | 2.09431  | 0.31933  | 0.02231  |
| C | 1.11352  | -2.86095 | -0.15499 | 2.91032  | 1.11134  | -0.01721 | 1.54244  | -2.71392 | -0.05374 |
| C | 0.68388  | -4.16440 | -0.59051 | 4.28496  | 0.68385  | 0.12600  | 1.33469  | -4.13973 | -0.08156 |
| C | -0.68280 | -4.16455 | -0.59063 | 4.28495  | -0.68389 | 0.12599  | -0.02449 | -4.34901 | -0.09394 |
| C | -1.11278 | -2.86121 | -0.15511 | 2.91031  | -1.11137 | -0.01721 | -0.65231 | -3.05233 | -0.04553 |
| C | -2.45529 | -2.45590 | -0.00005 | 2.46305  | -2.46377 | -0.00245 | -2.08092 | -2.80723 | -0.00341 |
| C | -2.86097 | -1.11352 | 0.15512  | 1.11179  | -2.91381 | -0.00097 | -2.70798 | -1.54884 | 0.01414  |
| C | -4.16447 | -0.68389 | 0.59048  | 0.68378  | -4.29565 | -0.01013 | -4.15105 | -1.32710 | 0.17505  |
| C | -4.16461 | 0.68280  | 0.59061  | -0.68382 | -4.29565 | 0.01011  | -4.35777 | 0.01048  | 0.18053  |
| C | -2.86123 | 1.11278  | 0.15525  | -1.11182 | -2.91380 | 0.00097  | -3.04956 | 0.65886  | 0.02032  |
| C | -2.45591 | 2.45528  | 0.00015  | -2.46307 | -2.46374 | 0.00245  | -2.82883 | 2.04767  | -0.00488 |
| C | -1.11352 | 2.86095  | -0.15499 | -2.91032 | -1.11134 | 0.01722  | -1.53663 | 2.70583  | -0.05671 |
| C | -0.68389 | 4.16440  | -0.59050 | -4.28496 | -0.68385 | -0.12597 | -1.32496 | 4.11658  | -0.25748 |
| C | 0.68280  | 4.16455  | -0.59062 | -4.28495 | 0.68389  | -0.12597 | 0.03492  | 4.32517  | -0.25038 |
| C | 1.11278  | 2.86121  | -0.15511 | -2.91031 | 1.11137  | 0.01722  | 0.65762  | 3.04182  | -0.04752 |
| C | 2.45529  | 2.45590  | -0.00005 | -2.46305 | 2.46377  | 0.00245  | 2.08689  | 2.80085  | -0.00535 |
| C | 2.86097  | 1.11351  | 0.15512  | -1.11179 | 2.91381  | 0.00096  | 2.71496  | 1.54369  | 0.03362  |
| C | 4.16447  | 0.68389  | 0.59048  | -0.68378 | 4.29565  | 0.01011  | 4.16632  | 1.31908  | 0.08516  |
| C | 4.16462  | -0.68280 | 0.59060  | 0.68382  | 4.29565  | -0.01014 | 4.37063  | -0.01848 | 0.06612  |
| C | 2.86123  | -1.11278 | 0.15525  | 1.11182  | 2.91380  | -0.00097 | 3.05176  | -0.66500 | 0.03480  |
| C | 2.45590  | -2.45528 | 0.00015  | 2.46307  | -2.46374 | -0.00244 | 2.83035  | -2.05172 | -0.00778 |
| H | 1.34568  | -4.96299 | -0.89160 | 5.13553  | 1.33768  | 0.24521  | 2.11309  | -4.88728 | -0.08552 |
| H | -1.34439 | -4.96327 | -0.89182 | 5.13552  | -1.33773 | 0.24521  | -0.54090 | -5.29583 | -0.13167 |
| H | -4.96310 | -1.34569 | 0.89145  | 1.33633  | -5.15499 | -0.03427 | -4.88631 | -2.10767 | 0.30047  |
| H | -4.96338 | 1.34439  | 0.89167  | -1.33638 | -5.15498 | 0.03424  | -5.29424 | 0.53088  | 0.31351  |
| H | -1.34569 | 4.96299  | -0.89159 | -5.13554 | -1.33768 | -0.24518 | -2.10026 | 4.85229  | -0.40774 |
| H | 1.34439  | 4.96327  | -0.89181 | -5.13552 | 1.33773  | -0.24518 | 0.55605  | 5.25922  | -0.39508 |
| H | 4.96310  | 1.34569  | 0.89144  | -1.33633 | 5.15499  | 0.03423  | 4.91227  | 2.09820  | 0.12856  |
| H | 4.96339  | -1.34439 | 0.89166  | 1.33638  | -5.15498 | -0.03427 | 5.31533  | -0.54110 | 0.07057  |
| C | -3.50623 | 3.50523  | 0.00017  | -3.52046 | -3.51145 | -0.03168 | -4.01956 | 2.93759  | 0.00975  |
| C | -3.42515 | 4.59664  | 0.88481  | -4.43738 | -3.62744 | 1.02836  | -4.19483 | 3.87615  | 1.04368  |
| C | -4.59765 | 3.42372  | -0.88442 | -3.62083 | -4.39224 | -1.12345 | -4.98529 | 2.85979  | -1.01017 |
| C | -4.41749 | 5.57725  | 0.89009  | -5.42482 | -4.61320 | 1.00187  | -5.31776 | 4.70376  | 1.06425  |
| H | -2.59347 | 4.65954  | 1.58000  | -4.36052 | -2.95501 | 1.87752  | -3.45748 | 3.93956  | 1.83846  |
| C | -5.57876 | 4.41557  | -0.88952 | -4.62281 | -5.36298 | -1.15616 | -6.09998 | 3.70019  | -0.99546 |
| H | -4.66024 | 2.59205  | -1.57965 | -2.92505 | -4.29887 | -1.95185 | -4.84707 | 2.15312  | -1.82325 |
| C | -5.49351 | 5.49155  | 0.00033  | -5.52298 | -5.47962 | -0.09183 | -6.27126 | 4.62049  | 0.04338  |
| H | -4.35230 | 6.40569  | 1.58880  | -6.11652 | -4.70408 | 1.83378  | -5.44960 | 5.41177  | 1.87679  |
| H | -6.40724 | 4.35001  | -1.58816 | -4.70103 | -6.02640 | -2.01206 | -6.83089 | 3.63869  | -1.79600 |
| H | -6.26145 | 6.25910  | 0.00040  | -6.29695 | -6.24065 | -0.11508 | -7.14088 | 5.27033  | 0.05693  |
| C | -3.50526 | -3.50621 | -0.00028 | 3.52042  | -3.51148 | 0.03168  | -2.95848 | -4.00956 | 0.02967  |
| C | -3.42386 | -4.59772 | 0.88420  | 3.62078  | -4.39228 | 1.12344  | -2.90237 | -4.90714 | 1.11094  |
| C | -4.59657 | -3.42502 | -0.88504 | 4.43736  | -3.62747 | -1.02835 | -3.85844 | -4.26176 | -1.02064 |



|    |          |          |          |          |          |          |          |          |          |
|----|----------|----------|----------|----------|----------|----------|----------|----------|----------|
| C  | -4.41574 | -5.57880 | 0.88911  | 4.62276  | -5.36303 | 1.15615  | -3.73723 | -6.02492 | 1.14477  |
| H  | -2.59227 | -4.66038 | 1.57952  | 2.92500  | -4.29892 | 1.95184  | -2.21614 | -4.71534 | 1.93060  |
| C  | -5.57720 | -4.41734 | -0.89052 | 5.42478  | -4.61324 | -1.00187 | -4.68249 | -5.38882 | -0.99110 |
| H  | -4.65938 | -2.59326 | -1.58014 | 4.36051  | -2.95503 | -1.87751 | -3.89686 | -3.58062 | -1.86585 |
| C  | -5.49162 | -5.49345 | -0.00085 | 5.52293  | -5.47967 | 0.09183  | -4.62636 | -6.27054 | 0.09258  |
| H  | -4.35027 | -6.40735 | 1.58767  | 4.70096  | -6.02646 | 2.01204  | -3.69541 | -6.70211 | 1.99247  |
| H  | -6.40556 | -4.35206 | -1.58932 | 6.11650  | -4.70412 | -1.83377 | -5.36468 | -5.57842 | -1.81426 |
| H  | -6.25918 | -6.26137 | -0.00108 | 6.29689  | -6.24070 | 0.11508  | -5.27045 | -7.14418 | 0.11744  |
| C  | 3.50623  | -3.50523 | 0.00017  | 3.52046  | 3.51145  | 0.03168  | 4.02764  | -2.94009 | 0.00435  |
| C  | 3.42516  | -4.59664 | 0.88481  | 3.62082  | 4.39225  | 1.12345  | 4.85574  | -3.00357 | 1.13770  |
| C  | 4.59766  | -3.42371 | -0.88441 | 4.43740  | 3.62743  | -1.02835 | 4.34078  | -3.72724 | -1.11715 |
| C  | 4.41750  | -5.57725 | 0.89009  | 4.62280  | 5.36299  | 1.15616  | 5.97532  | -3.83875 | 1.14874  |
| H  | 2.59348  | -4.65954 | 1.58000  | 2.92503  | 4.29889  | 1.95184  | 4.61119  | -2.40812 | 2.01269  |
| C  | 5.57877  | -4.41556 | -0.88952 | 5.42483  | 4.61319  | -1.00186 | 5.46735  | -4.55172 | -1.10792 |
| H  | 4.66024  | -2.59204 | -1.57964 | 4.36054  | 2.95499  | -1.87751 | 3.70805  | -3.67924 | -1.99872 |
| C  | 5.49353  | -5.49154 | 0.00033  | 5.52298  | 5.47962  | 0.09184  | 6.28520  | -4.61161 | 0.02557  |
| H  | 4.35231  | -6.40569 | 1.58881  | 4.70101  | 6.02642  | 2.01205  | 6.60210  | -3.88660 | 2.03408  |
| H  | 6.40725  | -4.35000 | -1.58816 | 6.11655  | 4.70406  | -1.83376 | 5.70698  | -5.14490 | -1.98525 |
| H  | 6.26147  | -6.25909 | 0.00040  | 6.29695  | 6.24065  | 0.11509  | 7.15787  | -5.25744 | 0.03320  |
| C  | 3.50526  | 3.50620  | -0.00028 | -3.52042 | 3.51148  | -0.03168 | 2.95477  | 4.00997  | -0.03132 |
| C  | 3.42385  | 4.59773  | 0.88419  | -4.43735 | 3.62749  | 1.02836  | 2.89045  | 4.95063  | 0.01245  |
| C  | 4.59658  | 3.42500  | -0.88502 | -3.62079 | 4.39227  | -1.12346 | 3.84049  | 4.23576  | -1.09959 |
| C  | 4.41572  | 5.57881  | 0.88910  | -5.42477 | 4.61325  | 1.00187  | 3.70702  | 6.08220  | 0.99494  |
| H  | 2.59225  | 4.66040  | 1.57950  | -4.36049 | 2.95505  | 1.87753  | 2.21095  | 4.78218  | 1.84282  |
| C  | 5.57721  | 4.41733  | -0.89050 | -4.62277 | 5.36302  | -1.15617 | 4.64587  | 5.37628  | -1.12176 |
| H  | 4.65940  | 2.59324  | -1.58012 | -2.92502 | 4.29889  | -1.95186 | 3.88104  | 3.52458  | -1.91954 |
| C  | 5.49162  | 5.49345  | -0.00085 | -5.52293 | 5.47967  | -0.09184 | 4.58427  | 6.29935  | -0.07321 |
| H  | 4.35025  | 6.40737  | 1.58765  | -6.11648 | 4.70414  | 1.83378  | 3.65939  | 6.79286  | 1.81447  |
| H  | 6.40558  | 4.35204  | -1.58929 | -4.70098 | 6.02644  | -2.01206 | 5.31705  | 5.54478  | -1.95844 |
| H  | 6.25918  | 6.26137  | -0.00108 | -6.29689 | 6.24070  | -0.11509 | 5.21410  | 7.18354  | -0.08883 |
| Ag | 0.00000  | 0.00000  | 0.00041  | 0.00000  | 0.00000  | 0.00000  | 0.00050  | -0.00182 | 0.00145  |

### AgTPP, total charge -1

|   | Singlet  |          |          | Triplet  |          |          | Quintet  |          |          |
|---|----------|----------|----------|----------|----------|----------|----------|----------|----------|
| N | -0.00001 | -2.14060 | -0.00008 | 0.07237  | -2.12325 | -0.03947 | 2.13631  | 0.00007  | -0.07623 |
| N | -2.16077 | 0.00002  | -0.42700 | -2.11800 | -0.07413 | 0.01960  | 0.00008  | -2.13685 | 0.00002  |
| N | 0.00000  | 2.14060  | 0.00010  | -0.07370 | 2.12521  | 0.01282  | -2.13631 | -0.00007 | 0.07624  |
| N | 2.16076  | -0.00001 | 0.42701  | 2.11837  | 0.07668  | 0.09127  | -0.00007 | 2.13685  | 0.00001  |
| C | 1.11612  | -2.92770 | 0.04920  | 1.21776  | -2.87694 | 0.06783  | 2.93576  | 1.11901  | -0.00690 |
| C | 0.68720  | -4.31166 | 0.02775  | 0.83950  | -4.24638 | 0.24052  | 4.29743  | 0.69309  | 0.10945  |
| C | -0.68725 | -4.31166 | -0.02766 | -0.54612 | -4.29498 | 0.23349  | 4.29748  | -0.69280 | 0.10946  |
| C | -1.11615 | -2.92770 | -0.04925 | -1.01776 | -2.95446 | 0.05701  | 2.93584  | -1.11881 | -0.00689 |
| C | -2.46782 | -2.45794 | -0.11251 | -2.39471 | -2.54135 | 0.01583  | 2.47462  | -2.47516 | 0.00200  |
| C | -2.92048 | -1.11548 | -0.16616 | -2.87441 | -1.22283 | -0.01250 | 1.11934  | -2.93877 | 0.00202  |
| C | -4.27233 | -0.68170 | 0.18672  | -4.27644 | -0.82575 | -0.08984 | 0.69306  | -4.30530 | -0.00694 |
| C | -4.27232 | 0.68173  | 0.18673  | -4.32173 | 0.53599  | -0.08497 | -0.69278 | -4.30534 | 0.00679  |
| C | -2.92047 | 1.11551  | -0.16613 | -2.94924 | 1.02362  | -0.02603 | -1.11914 | -2.93884 | -0.00206 |
| C | -2.46781 | 2.45797  | -0.11246 | -2.56061 | 2.36924  | 0.00707  | -2.47445 | -2.47532 | -0.00199 |
| C | -1.11612 | 2.92770  | -0.04920 | -1.22088 | 2.88259  | 0.04778  | -2.93576 | -1.11901 | 0.00696  |
| C | -0.68721 | 4.31166  | -0.02775 | -0.84593 | 4.26329  | 0.09840  | -4.29745 | -0.69309 | -0.10929 |
| C | 0.68724  | 4.31166  | 0.02766  | 0.53962  | 4.31278  | 0.10716  | -4.29749 | 0.69280  | -0.10929 |
| C | 1.11614  | 2.92770  | 0.04925  | 1.01438  | 2.96275  | 0.04234  | -2.93584 | 1.11881  | 0.00696  |
| C | 2.46782  | 2.45795  | 0.11250  | 2.39014  | 2.54639  | 0.00668  | -2.47462 | 2.47515  | -0.00197 |
| C | 2.92048  | 1.11548  | 0.16616  | 2.86898  | 1.22706  | 0.00087  | -1.11934 | 2.93877  | -0.00205 |
| C | 4.27232  | 0.68170  | -0.18672 | 4.26516  | 0.83266  | -0.15027 | -0.69307 | 4.30530  | 0.00679  |
| C | 4.27232  | -0.68173 | -0.18672 | 4.31309  | -0.52877 | -0.14744 | 0.69277  | 4.30535  | -0.00695 |
| C | 2.92047  | -1.11551 | 0.16614  | 2.94874  | -1.01963 | 0.00615  | 1.11914  | 2.93885  | 0.00201  |
| C | 2.46780  | -2.45797 | 0.11247  | 2.56164  | -2.36781 | 0.02628  | 2.47445  | 2.47532  | 0.00198  |
| H | 1.33168  | -5.17719 | 0.09727  | 1.51956  | -5.07593 | 0.37305  | 5.15521  | 1.34311  | 0.20564  |
| H | -1.33174 | -5.17718 | -0.09709 | -1.16786 | -5.16987 | 0.36056  | 5.15530  | -1.34276 | 0.20565  |
| H | -5.08976 | -1.33313 | 0.46505  | -5.11464 | -1.50582 | -0.14580 | 1.34202  | -5.16892 | -0.02390 |
| H | -5.08975 | 1.33316  | 0.46509  | -5.20348 | 1.16042  | -0.12040 | -1.34169 | -5.16901 | 0.02367  |
| H | -1.33169 | 5.17719  | -0.09727 | -1.52802 | 5.10132  | 0.12338  | -5.15523 | -1.34311 | -0.20541 |
| H | 1.33173  | 5.17719  | 0.09709  | 1.15873  | 5.19715  | 0.15681  | -5.15532 | 1.34276  | -0.20541 |
| H | 5.08975  | 1.33313  | -0.46506 | 5.09539  | 1.51431  | -0.27044 | -1.34204 | 5.16892  | 0.02368  |
| H | 5.08974  | -1.33316 | -0.46508 | 5.18914  | -1.15053 | -0.26696 | 1.34168  | 5.16901  | -0.02392 |
| C | -3.53509 | 3.49993  | -0.01154 | -3.65352 | 3.39179  | -0.00038 | -3.53189 | -3.52518 | -0.03221 |
| C | -3.61843 | 4.36172  | 1.09733  | -3.92752 | 4.16051  | 1.14366  | -4.43307 | -3.67094 | 1.03763  |
| C | -4.50246 | 3.63258  | -1.02388 | -4.43143 | 3.61262  | -1.14909 | -3.66080 | -4.39336 | -1.13103 |
| C | -4.62845 | 5.32213  | 1.18979  | -4.95042 | 5.11238  | 1.14376  | -5.42627 | -4.65303 | 1.01311  |

|    |          |          |          |          |          |          |          |          |          |
|----|----------|----------|----------|----------|----------|----------|----------|----------|----------|
| H  | -2.88392 | 4.26319  | 1.89083  | -3.32827 | 4.00002  | 2.03525  | -4.34355 | -3.00365 | 1.88962  |
| C  | -5.51421 | 4.59227  | -0.93533 | -5.45901 | 4.56096  | -1.15263 | -4.65587 | -5.37353 | -1.16045 |
| H  | -4.44922 | 2.97096  | -1.88350 | -4.22149 | 3.02922  | -2.04102 | -2.97164 | -4.28769 | -1.96345 |
| C  | -5.58189 | 5.44346  | 0.17258  | -5.72291 | 5.31582  | -0.00544 | -5.54329 | -5.50939 | -0.08727 |
| H  | -4.67519 | 5.97155  | 2.06061  | -5.14765 | 5.69175  | 2.04249  | -6.10733 | -4.75098 | 1.85499  |
| H  | -6.24786 | 4.67655  | -1.73340 | -6.04938 | 4.71277  | -2.05305 | -4.74028 | -6.02888 | -2.02391 |
| H  | -6.36837 | 6.19054  | 0.24380  | -6.52023 | 6.05479  | -0.00643 | -6.31689 | -6.27280 | -0.10843 |
| C  | -3.53513 | -3.49988 | -0.01157 | -3.40770 | -3.63902 | 0.01919  | 3.53213  | -3.52494 | 0.03220  |
| C  | -4.50242 | -3.63261 | -1.02397 | -4.31963 | -3.78763 | 1.07931  | 3.66101  | -4.39324 | 1.13094  |
| C  | -3.61858 | -4.36155 | 1.09739  | -3.47214 | -4.56327 | -1.03958 | 4.43342  | -3.67054 | -1.03758 |
| C  | -5.51420 | -4.59227 | -0.93540 | -5.27168 | -4.81140 | 1.07584  | 4.65615  | -5.37334 | 1.16034  |
| H  | -4.44910 | -2.97108 | -1.88365 | -4.27137 | -3.08919 | 1.90967  | 2.97177  | -4.28770 | 1.96331  |
| C  | -4.62863 | -5.32193 | 1.18987  | -4.41958 | -5.58919 | -1.04595 | 5.42668  | -4.65255 | -1.01307 |
| H  | -2.88414 | -4.26295 | 1.89094  | -2.76806 | -4.46359 | -1.86044 | 4.34393  | -3.00316 | -1.88951 |
| C  | -5.58198 | -5.44335 | 0.17259  | -5.32690 | -5.71788 | 0.01254  | 5.54367  | -5.50902 | 0.08722  |
| H  | -6.24778 | -4.67662 | -1.73352 | -5.96520 | -4.90440 | 1.90821  | 4.74053  | -6.02877 | -2.02375 |
| H  | -4.67545 | -5.97127 | 2.06075  | -4.45314 | -6.28618 | -1.87991 | 6.10782  | -4.75037 | -1.85490 |
| H  | -6.36848 | -6.19040 | 0.24382  | -6.06517 | -6.51582 | 0.00881  | 6.31732  | -6.27237 | 0.10838  |
| C  | 3.53509  | -3.49992 | 0.01155  | 3.65016  | -3.38974 | 0.00595  | 3.53189  | 3.52518  | 0.03217  |
| C  | 4.50242  | -3.63260 | 1.02392  | 4.60082  | -3.46199 | 1.03988  | 3.66074  | 4.39348  | 1.13091  |
| C  | 3.61848  | -4.36168 | -1.09735 | 3.75330  | -4.31422 | -1.04976 | 4.43316  | 3.67083  | -1.03763 |
| C  | 5.51418  | -4.59228 | 0.93537  | 5.62566  | -4.41247 | 1.01448  | 4.65581  | 5.37365  | 1.16028  |
| H  | 4.44916  | -2.97101 | 1.88356  | 4.52468  | -2.76229 | 1.86704  | 2.97152  | 4.28790  | 1.96329  |
| C  | 4.62851  | -5.32208 | -1.18980 | 4.77426  | -5.26639 | -1.07818 | 5.42635  | 4.65291  | -1.01315 |
| H  | 2.88399  | -4.26313 | -1.89087 | 3.02151  | -4.27251 | -1.85102 | 4.34369  | 3.00345  | -1.88955 |
| C  | 5.58190  | -5.44344 | -0.17256 | 5.71806  | -5.31997 | -0.04531 | 5.54331  | 5.50939  | 0.08715  |
| H  | 6.24780  | -4.67658 | 1.73347  | 6.34749  | -4.44759 | 1.82697  | 4.74017  | 6.02908  | 2.02369  |
| H  | 4.67527  | -5.97148 | -2.06064 | 4.83666  | -5.96424 | -1.90973 | 6.10747  | 4.75077  | -1.85498 |
| H  | 6.36839  | -6.19051 | -0.24377 | 6.51326  | -6.06089 | -0.06625 | 6.31691  | 6.27279  | -0.10829 |
| C  | 3.53513  | 3.49988  | 0.01155  | 3.40858  | 3.63823  | -0.04250 | -3.53213 | 3.52494  | -0.03217 |
| C  | 3.61861  | 4.36151  | -1.09744 | 3.47038  | 4.52224  | -1.13514 | -4.43332 | 3.67063  | 1.03768  |
| C  | 4.50240  | 3.63264  | 1.02397  | 4.33530  | 3.81431  | 1.00036  | -3.66112 | 4.39313  | -1.13098 |
| C  | 4.62867  | 5.32188  | -1.18993 | 4.42756  | 5.53777  | -1.18879 | -5.42658 | 4.65264  | 1.01318  |
| H  | 2.88419  | 4.26288  | -1.89101 | 2.75764  | 4.39898  | -1.94520 | -4.34374 | 3.00332  | 1.88966  |
| C  | 5.51418  | 4.59229  | 0.93539  | 5.29716  | 4.82760  | 0.94957  | -4.65625 | 5.37323  | -1.16037 |
| H  | 4.44906  | 2.97114  | 1.88367  | 4.29164  | 3.14429  | 1.85412  | -2.97195 | 4.28752  | -1.96341 |
| C  | 5.58199  | 5.44334  | -0.17263 | 5.34813  | 5.69531  | -0.14580 | -5.54368 | 5.50901  | -0.08718 |
| H  | 4.67551  | 5.97118  | -2.06083 | 4.45893  | 6.20331  | -2.04812 | -6.10765 | 4.75053  | 1.85506  |
| H  | 6.24775  | 4.67666  | 1.73352  | 6.00235  | 4.94226  | 1.76934  | -4.74072 | 6.02859  | -2.02383 |
| H  | 6.36850  | 6.19038  | -0.24387 | 6.09405  | 6.48505  | -0.18666 | -6.31733 | 6.27236  | -0.10833 |
| Ag | 0.00000  | 0.00000  | 0.00001  | 0.00023  | 0.00082  | 0.01515  | 0.00000  | 0.00000  | 0.00002  |

### H-AgTPP, total charge 0

|   | Singlet  |          |          | Triplet  |          |          | Quintet  |          |          |
|---|----------|----------|----------|----------|----------|----------|----------|----------|----------|
| N | 0.00040  | 2.21955  | -0.40212 | -2.11182 | -0.00001 | -0.07616 | 2.12554  | 0.00000  | -0.10002 |
| N | 2.07307  | 0.03130  | 0.01712  | -0.00114 | 2.11125  | -0.02456 | 0.00137  | -2.13114 | -0.01866 |
| N | -0.00038 | -2.13742 | -0.13879 | 2.11061  | 0.00001  | 0.02802  | -2.12339 | 0.00000  | 0.05732  |
| N | -2.07307 | 0.03200  | 0.01715  | -0.00113 | -2.11125 | -0.02456 | 0.00137  | 2.13114  | -0.01866 |
| C | -1.14368 | 2.95167  | -0.13349 | -2.90511 | -1.11641 | -0.03201 | 2.92374  | 1.11324  | -0.02480 |
| C | -0.68758 | 4.24071  | 0.29268  | -4.28873 | -0.68310 | 0.03329  | 4.28050  | 0.69536  | 0.08821  |
| C | 0.68905  | 4.24047  | 0.29270  | -4.28873 | 0.68307  | 0.03329  | 4.28051  | -0.69535 | 0.08821  |
| C | 1.14472  | 2.95129  | -0.13347 | -2.90512 | 1.11640  | -0.03201 | 2.92374  | -1.11323 | -0.02480 |
| C | 2.47288  | 2.48102  | -0.18739 | -2.46056 | 2.45919  | -0.02318 | 2.45654  | -2.48210 | -0.01744 |
| C | 2.86801  | 1.11716  | -0.24326 | -1.11778 | 2.90452  | -0.02777 | 1.12020  | -2.92662 | -0.02125 |
| C | 4.19640  | 0.67155  | -0.62306 | -0.68485 | 4.28957  | -0.05210 | 0.68426  | -4.31376 | -0.04805 |
| C | 4.17890  | -0.69125 | -0.58780 | 0.68135  | 4.29017  | -0.04468 | -0.67914 | -4.31484 | -0.03721 |
| C | 2.83943  | -1.09457 | -0.19002 | 1.11533  | 2.90517  | -0.03182 | -1.11685 | -2.92787 | -0.02944 |
| C | 2.43286  | -2.45345 | -0.10320 | 2.45785  | 2.45959  | -0.03282 | -2.45299 | -2.48264 | -0.02811 |
| C | 1.09955  | -2.93041 | -0.02763 | 2.90207  | 1.11635  | -0.02782 | -2.91845 | -1.11326 | -0.03409 |
| C | 0.68186  | -4.31528 | 0.17359  | 4.28349  | 0.68309  | -0.13199 | -4.27103 | -0.69512 | -0.19341 |
| C | -0.68335 | -4.31505 | 0.17360  | 4.28349  | -0.68306 | -0.13199 | -4.27103 | 0.69511  | -0.19341 |
| C | -1.10057 | -2.93004 | -0.02762 | 2.90207  | -1.11633 | -0.02782 | -2.91846 | 1.11325  | -0.03409 |
| C | -2.43372 | -2.45261 | -0.10317 | 2.45787  | -2.45957 | -0.03282 | -2.45300 | 2.48264  | -0.02811 |
| C | -2.83982 | -1.09359 | -0.18999 | 1.11534  | -2.90516 | -0.03182 | -1.11686 | 2.92787  | -0.02944 |
| C | -4.17915 | -0.68981 | -0.58779 | 0.68137  | -4.29016 | -0.04468 | -0.67915 | 4.31483  | -0.03721 |
| C | -4.19617 | 0.67300  | -0.62306 | -0.68483 | -4.28958 | -0.05210 | 0.68425  | 4.31376  | -0.04805 |
| C | -2.86762 | 1.11814  | -0.24326 | -1.11776 | -2.90453 | -0.02777 | 1.12019  | 2.92662  | -0.02125 |
| C | -2.47201 | 2.48187  | -0.18742 | -2.46054 | -2.45921 | -0.02318 | 2.45653  | 2.48210  | -0.01744 |
| H | -1.33915 | 5.03757  | 0.61911  | -5.14501 | -1.33951 | 0.08692  | 5.13812  | 1.34572  | 0.17467  |
| H | 1.34089  | 5.03712  | 0.61914  | -5.14502 | 1.33948  | 0.08692  | 5.13813  | -1.34570 | 0.17467  |

|    |          |          |          |          |          |          |          |          |          |
|----|----------|----------|----------|----------|----------|----------|----------|----------|----------|
| H  | 5.01111  | 1.31383  | -0.92533 | -1.34137 | 5.14704  | -0.07792 | 1.33882  | -5.17218 | -0.07919 |
| H  | 4.97997  | -1.36414 | -0.85757 | 1.33698  | 5.14861  | -0.05046 | -1.33202 | -5.17497 | -0.03715 |
| H  | 1.33745  | -5.16230 | 0.31825  | 5.13680  | 1.33993  | -0.21833 | -5.12318 | -1.34657 | -0.31821 |
| H  | -1.33923 | -5.16185 | 0.31827  | 5.13681  | -1.33990 | -0.21833 | -5.12318 | 1.34655  | -0.31821 |
| H  | -4.98045 | -1.36242 | -0.85756 | 1.33701  | -5.14860 | -0.05046 | -1.33203 | 5.17496  | -0.03715 |
| H  | -5.01065 | 1.31556  | -0.92534 | -1.34134 | -5.14705 | -0.07792 | 1.33881  | 5.17219  | -0.07919 |
| C  | 3.51659  | -3.48134 | -0.12680 | 3.52040  | 3.51496  | -0.05730 | -3.51801 | -3.52688 | -0.05198 |
| C  | 3.56168  | -4.46021 | -1.13451 | 4.34197  | 3.72413  | 1.06152  | -4.40548 | -3.65983 | 1.02960  |
| C  | 4.51483  | -3.49175 | 0.86286  | 3.71747  | 4.30851  | -1.19838 | -3.66183 | -4.38603 | -1.15404 |
| C  | 4.57572  | -5.42046 | -1.15330 | 5.33589  | 4.70605  | 1.04160  | -5.40043 | -4.63904 | 1.01619  |
| H  | 2.80089  | -4.45460 | -1.90934 | 4.19311  | 3.11439  | 1.94804  | -4.30406 | -2.99417 | 1.88144  |
| C  | 5.52575  | -4.45526 | 0.84928  | 4.71274  | 5.28895  | -1.22073 | -4.66469 | -5.35849 | -1.17225 |
| H  | 4.48662  | -2.74106 | 1.64715  | 3.08863  | 4.14788  | -2.06937 | -2.98863 | -4.27956 | -1.99953 |
| C  | 5.56038  | -5.42278 | -0.16002 | 5.52451  | 5.49123  | -0.10009 | -5.53463 | -5.49058 | -0.08577 |
| H  | 4.59870  | -6.16363 | -1.94552 | 5.96016  | 4.85837  | 1.91761  | -6.07091 | -4.73644 | 1.86539  |
| H  | 6.28408  | -4.45141 | 1.62732  | 4.85538  | 5.89138  | -2.11352 | -4.76708 | -6.00965 | -0.35580 |
| H  | 6.34783  | -6.17102 | -0.17300 | 6.29781  | 6.25395  | -0.11661 | -6.31231 | -6.24885 | -0.09811 |
| C  | 3.54381  | 3.51653  | -0.15429 | -3.52008 | 3.51767  | 0.00070  | 3.51721  | -3.53077 | 0.01027  |
| C  | 4.57571  | 3.45249  | 0.79995  | -3.71225 | 4.31044  | 1.14315  | 3.65407  | -4.38443 | 1.11749  |
| C  | 3.54500  | 4.58497  | -1.06938 | -4.34010 | 3.73397  | -1.11787 | 4.40270  | -3.67810 | -1.07098 |
| C  | 5.57590  | 4.42569  | 0.83832  | -4.70201 | 5.29640  | 1.16736  | 4.64974  | -5.36407 | 1.14197  |
| H  | 4.58017  | 2.63749  | 1.51731  | -3.08366 | 4.14488  | 2.01338  | 2.98052  | -4.26822 | 1.96139  |
| C  | 4.54671  | 5.55704  | -1.03405 | -5.32858 | 4.72136  | -1.09606 | 5.39054  | -4.66446 | -1.05121 |
| H  | 2.76062  | 4.63892  | -1.81850 | -4.19435 | 3.12570  | -2.00595 | 4.30526  | -3.01846 | -1.92799 |
| C  | 5.56583  | 5.48151  | -0.07914 | -5.51283 | 5.50525  | 0.04726  | 5.51884  | -5.50940 | 0.05649  |
| H  | 6.35993  | 4.36220  | 1.58769  | -4.84093 | 5.89816  | 2.06116  | 4.74691  | -6.01083 | 2.00940  |
| H  | 4.53493  | 6.36883  | -1.75599 | -5.95179 | 4.87915  | -1.97187 | 6.05971  | -4.77288 | -1.90012 |
| H  | 6.34504  | 6.23782  | -0.05056 | -6.28182 | 6.27228  | 0.06523  | 6.29093  | -6.27327 | 0.07370  |
| C  | -3.54257 | 3.51775  | -0.15433 | -3.52005 | -3.51769 | 0.00070  | 3.51720  | 3.53078  | 0.01027  |
| C  | -4.57451 | 3.45406  | 0.79989  | -3.71221 | -4.31047 | 1.14314  | 3.65406  | 4.38444  | 1.11749  |
| C  | -3.54338 | 4.58620  | -1.06941 | -4.34008 | -3.73399 | -1.11787 | 4.40269  | 3.67811  | -1.07098 |
| C  | -5.57436 | 4.42761  | 0.83826  | -4.70197 | -5.29643 | 1.16735  | 4.64972  | 5.36408  | 1.14197  |
| H  | -4.57926 | 2.63906  | 1.51726  | -3.08363 | -4.14491 | 2.01337  | 2.98050  | 4.26823  | 1.96138  |
| C  | -4.54475 | 5.55861  | -1.03409 | -5.32855 | -4.72138 | -1.09605 | 5.39053  | 4.66447  | -1.05121 |
| H  | -2.75897 | 4.63987  | -1.81852 | -4.19434 | -3.12572 | -2.00595 | 4.30525  | 3.01847  | -1.92799 |
| C  | -5.56391 | 5.48343  | -0.07920 | -5.51280 | -5.50528 | 0.04726  | 5.51882  | 5.50941  | 0.05649  |
| H  | -6.35843 | 4.36439  | 1.58761  | -4.84088 | -5.89820 | 2.06115  | 4.74689  | 6.01084  | 2.00940  |
| H  | -4.53267 | 6.37040  | -1.75603 | -5.95177 | -4.87917 | -1.97187 | 6.05970  | 4.77289  | -1.90012 |
| H  | -6.34285 | 6.24001  | -0.05062 | -6.28179 | -6.27231 | 0.06523  | 6.29091  | 6.27329  | 0.07370  |
| C  | -3.51780 | -3.48013 | -0.12676 | 3.52042  | -3.51494 | -0.05730 | -3.51802 | 3.52687  | -0.05198 |
| C  | -3.56324 | -4.45899 | -1.13447 | 4.34200  | -3.72410 | 1.06152  | -4.40549 | 3.65982  | 1.02960  |
| C  | -4.51605 | -3.49019 | 0.86289  | 3.71749  | -4.30849 | -1.19838 | -3.66184 | 4.38602  | -1.15404 |
| C  | -4.57761 | -5.41889 | -1.15325 | 5.33593  | -4.70601 | 1.04160  | -5.40044 | 4.63903  | 1.01619  |
| H  | -2.80245 | -4.45365 | -1.90930 | 4.19314  | -3.11435 | 1.94804  | -4.30407 | 2.99415  | 1.88144  |
| C  | -5.52730 | -4.45335 | 0.84932  | 4.71277  | -5.28893 | -1.22073 | -4.66470 | 5.35848  | -1.17225 |
| H  | -4.48758 | -2.73950 | 1.64718  | 3.08864  | -4.14787 | -2.06937 | -2.98864 | 4.27956  | -1.99952 |
| C  | -5.56227 | -5.42087 | -0.15997 | 5.52455  | -5.49119 | -0.10009 | -5.53464 | 5.49056  | -0.08577 |
| H  | -4.60085 | -6.16206 | -1.94547 | 5.96020  | -4.85832 | 1.91761  | -6.07092 | 4.73642  | 1.86539  |
| H  | -6.28563 | -4.44923 | 1.62736  | 4.85540  | -5.89136 | -2.11351 | -4.76709 | 6.00964  | -2.03579 |
| H  | -6.34998 | -6.16883 | -0.17294 | 6.29784  | -6.25391 | -0.11661 | -6.31233 | 6.24883  | -0.09810 |
| Ag | -0.00003 | -0.12452 | 0.99876  | -0.00437 | 0.00000  | 0.17220  | 0.00526  | 0.00000  | 0.12966  |
| H  | 0.00017  | 1.32249  | -0.86966 | -0.07544 | -0.00001 | 2.04788  | 0.09796  | 0.00000  | 2.04391  |

### H-AgTTP, total charge 1

|   | Doublet  |          | Quartet  |          |          | Sextet   |          |          |          |
|---|----------|----------|----------|----------|----------|----------|----------|----------|----------|
| N | 2.10415  | -0.00048 | 0.09876  | 2.11961  | -0.00579 | -0.12605 | 2.12298  | -0.00002 | -0.12462 |
| N | -0.00048 | -2.09482 | -0.13224 | -0.00481 | -2.11901 | -0.01653 | 0.00182  | -2.11813 | -0.02454 |
| N | -2.10415 | 0.00048  | 0.09875  | -2.11785 | 0.00574  | 0.09362  | -2.11858 | 0.00003  | 0.07336  |
| N | 0.00048  | 2.09482  | -0.13224 | 0.00706  | 2.11898  | -0.01632 | 0.00187  | 2.11813  | -0.02453 |
| C | 2.86712  | 1.11205  | -0.17993 | 2.91637  | 1.10383  | -0.04442 | 2.91742  | 1.11723  | -0.05144 |
| C | 4.16471  | 0.68277  | -0.63731 | 4.29069  | 0.67237  | 0.08508  | 4.31434  | 0.67679  | 0.05821  |
| C | 4.16439  | -0.68466 | -0.63734 | 4.28687  | -0.69605 | 0.08496  | 4.31432  | -0.67689 | 0.05821  |
| C | 2.86662  | -1.11336 | -0.17993 | 2.91014  | -1.11976 | -0.04460 | 2.91740  | -1.11730 | -0.05144 |
| C | 2.45561  | -2.45673 | -0.01753 | 2.45833  | -2.47106 | -0.02517 | 2.48793  | -2.45613 | -0.02619 |
| C | 1.11241  | -2.86472 | 0.14374  | 1.10559  | -2.91741 | -0.02721 | 1.11285  | -2.91589 | -0.03875 |
| C | 0.68261  | -4.16599 | 0.58814  | 0.67438  | -4.29776 | -0.05689 | 0.69084  | -4.29298 | -0.07770 |
| C | -0.68453 | -4.16568 | 0.58812  | -0.69370 | -4.29526 | -0.03470 | -0.68500 | -4.29438 | -0.05551 |
| C | -1.11372 | -2.86421 | 0.14374  | -1.11896 | -2.91264 | -0.02275 | -1.10873 | -2.91731 | -0.03443 |
| C | -2.45673 | -2.45560 | -0.01754 | -2.46899 | -2.45809 | -0.01571 | -2.48342 | -2.45651 | -0.02531 |
| C | -2.86713 | -1.11205 | -0.17994 | -2.91186 | -1.10393 | -0.00184 | -2.91134 | -1.11733 | -0.00478 |

|    |          |          |          |          |          |          |          |          |          |
|----|----------|----------|----------|----------|----------|----------|----------|----------|----------|
| C  | -4.16472 | -0.68276 | -0.63732 | -4.28267 | -0.67234 | -0.16708 | -4.30640 | -0.67673 | -0.13805 |
| C  | -4.16441 | 0.68468  | -0.63728 | -4.27890 | 0.69580  | -0.16711 | -4.30639 | 0.67683  | -0.13805 |
| C  | -2.86661 | 1.11336  | -0.17994 | -2.90571 | 1.11981  | -0.00195 | -2.91131 | 1.11739  | -0.00478 |
| C  | -2.45560 | 2.45672  | -0.01754 | -2.45531 | 2.47151  | -0.01582 | -2.48337 | 2.45657  | -0.02531 |
| C  | -1.11241 | 2.86472  | 0.14374  | -1.10282 | 2.91865  | -0.02263 | -1.10866 | 2.91734  | -0.03443 |
| C  | -0.68263 | 4.16601  | 0.58808  | -0.67006 | 4.29890  | -0.03430 | -0.68490 | 4.29439  | -0.05552 |
| C  | 0.68452  | 4.16569  | 0.58811  | 0.69804  | 4.29399  | -0.05634 | 0.69094  | 4.29297  | -0.07771 |
| C  | 1.11371  | 2.86421  | 0.14375  | 1.12172  | 2.91132  | -0.02678 | 1.11292  | 2.91586  | -0.03875 |
| C  | 2.45673  | 2.45560  | -0.01752 | 2.47207  | 2.45753  | -0.02480 | 2.48798  | 2.45607  | -0.02619 |
| H  | 4.95791  | 1.34377  | -0.95418 | 5.14518  | 1.32306  | 0.19275  | 5.16475  | 1.33485  | 0.15468  |
| H  | 4.95729  | -1.34602 | -0.95424 | 5.13772  | -1.35150 | 0.19254  | 5.16471  | -1.33497 | 0.15468  |
| H  | 1.34276  | -4.96403 | 0.89440  | 1.32513  | -5.15785 | -0.09938 | 1.34607  | -5.14940 | -0.12178 |
| H  | -1.34505 | -4.96343 | 0.89436  | -1.34751 | -5.15389 | -0.02652 | -1.33848 | -5.15312 | -0.05646 |
| H  | -4.95792 | -1.34375 | -0.95420 | -5.13215 | -1.32411 | -0.30456 | -5.15326 | -1.33586 | -0.25682 |
| H  | -4.95732 | 1.34604  | -0.95413 | -5.12479 | 1.35222  | -0.30453 | -5.15324 | 1.33597  | -0.25682 |
| H  | -1.34278 | 4.96407  | 0.89428  | -1.31917 | 5.16109  | -0.02600 | -1.33836 | 5.15315  | -0.05648 |
| H  | 1.34503  | 4.96344  | 0.89435  | 1.35342  | 5.15056  | -0.09862 | 1.34619  | 5.14937  | -0.12179 |
| C  | -3.50711 | -3.50386 | -0.01696 | -3.53144 | -3.50025 | -0.05019 | -3.53692 | -3.50838 | -0.05257 |
| C  | -4.61115 | -3.40767 | 0.85107  | -4.44961 | -3.60857 | 1.00979  | -4.42922 | -3.64533 | 1.02525  |
| C  | -3.41572 | -4.60856 | -0.88465 | -3.63813 | -4.38128 | -1.14131 | -3.65915 | -4.37329 | -1.15472 |
| C  | -5.59319 | -4.39831 | 0.85756  | -5.44326 | -4.58803 | 0.98460  | -5.41986 | -4.62933 | 1.00269  |
| H  | -4.68163 | -2.56633 | 1.53366  | -4.36845 | -2.93542 | 1.85795  | -4.33214 | -2.98903 | 1.88529  |
| C  | -4.40979 | -5.58704 | -0.88975 | -4.64633 | -5.34552 | -1.17271 | -4.65927 | -5.34631 | -1.18085 |
| H  | -2.57540 | -4.68230 | -1.56818 | -2.94305 | -4.29233 | -1.97075 | -2.98079 | -4.26732 | -1.99626 |
| C  | -5.49752 | -5.48702 | -0.01566 | -5.54692 | -5.45528 | -0.10794 | -5.53921 | -5.47934 | -0.10103 |
| H  | -6.43072 | -4.32189 | 1.54416  | -6.13565 | -4.67322 | 1.81654  | -6.09513 | -4.73251 | 1.84665  |
| H  | -4.33705 | -6.42513 | -1.57608 | -4.72937 | -6.00899 | -2.02811 | -4.75326 | -5.99806 | -2.04417 |
| H  | -6.26661 | -6.25342 | -0.01515 | -6.32575 | -6.21136 | -0.13021 | -6.31255 | -6.24111 | -0.12029 |
| C  | 3.50551  | -3.50547 | -0.01696 | 3.51051  | -3.52335 | 0.01125  | 3.53586  | -3.51274 | 0.01377  |
| C  | 4.60955  | -3.40983 | 0.85113  | 3.59965  | -4.40683 | 1.10207  | 3.62998  | -4.38268 | 1.11495  |
| C  | 3.41367  | -4.61007 | -0.88474 | 4.43195  | -3.64376 | -1.04460 | 4.44559  | -3.65544 | -1.04870 |
| C  | 5.59115  | -4.40091 | 0.85760  | 4.59569  | -5.38343 | 1.13857  | 4.62136  | -5.36399 | 1.15667  |
| H  | 4.68037  | -2.56857 | 1.53378  | 2.90000  | -4.31040 | 1.92683  | 2.93595  | -4.27422 | 1.94326  |
| C  | 4.40731  | -5.58899 | -0.88985 | 5.41320  | -4.63545 | -1.01442 | 5.42738  | -4.64772 | -1.01082 |
| H  | 2.57337  | -4.68338 | -1.56832 | 4.36257  | -2.97072 | -1.89392 | 4.36851  | -2.99770 | -1.90968 |
| C  | 5.49504  | -5.48952 | -0.01569 | 5.50072  | -5.50378 | 0.07877  | 5.51995  | -5.50122 | 0.09290  |
| H  | 6.42867  | -4.32491 | 1.54426  | 4.66547  | -6.04858 | 1.99384  | 4.69368  | -6.01924 | 2.01941  |
| H  | 4.33423  | -6.42700 | -1.57624 | 6.10818  | -4.72984 | -1.84321 | 6.11630  | -4.75517 | -1.84315 |
| H  | 6.26378  | -6.25627 | -0.01519 | 6.27002  | -6.26943 | 0.10487  | 6.28652  | -6.26941 | 0.12406  |
| C  | 3.50711  | 3.50386  | -0.01694 | 3.53002  | 3.50400  | 0.01171  | 3.53594  | 3.51267  | 0.01377  |
| C  | 3.41570  | 4.60857  | -0.88463 | 3.62405  | 4.38696  | 1.10254  | 3.63008  | 4.38260  | 1.11495  |
| C  | 4.61115  | 3.40767  | 0.85107  | 4.45217  | 3.61928  | -1.04411 | 4.44567  | 3.65534  | -1.04870 |
| C  | 4.40978  | 5.58705  | -0.88974 | 4.62553  | 5.35797  | 1.13909  | 4.62148  | 5.36388  | 1.15667  |
| H  | 2.57538  | 4.68231  | -1.56815 | 2.92388  | 4.29439  | 1.92729  | 2.93605  | 4.27416  | 1.94326  |
| C  | 5.59320  | 4.39830  | 0.85755  | 5.43894  | 4.60548  | -1.01389 | 5.42748  | 4.64760  | -1.01082 |
| H  | 4.68165  | 2.56632  | 1.53364  | 4.37907  | 2.94664  | -1.89344 | 4.36858  | 2.99760  | -1.90968 |
| C  | 5.49752  | 5.48702  | -0.01566 | 5.53126  | 5.47328  | 0.07932  | 5.52007  | 5.50110  | 0.09290  |
| H  | 4.33703  | 6.42514  | -1.57606 | 4.69902  | 6.02269  | 1.99438  | 4.69382  | 6.01913  | 2.01941  |
| H  | 6.43073  | 4.32187  | 1.54414  | 6.13446  | 4.69600  | -1.84265 | 6.11641  | 4.75503  | -1.84315 |
| H  | 6.26660  | 6.25342  | -0.01515 | 6.30482  | 6.23463  | 0.10547  | 6.28667  | 6.26927  | 0.12406  |
| C  | -3.50550 | 3.50546  | -0.01696 | -3.51192 | 3.51952  | -0.05075 | -3.53684 | 3.50846  | -0.05257 |
| C  | -4.60967 | 3.40969  | 0.85095  | -4.42971 | 3.63304  | 1.00902  | -4.42914 | 3.64542  | 1.02526  |
| C  | -3.41351 | 4.61019  | -0.88455 | -3.61330 | 4.40119  | -1.14187 | -3.65905 | 4.37338  | -1.15471 |
| C  | -5.59127 | 4.40076  | 0.85742  | -5.41774 | 4.61816  | 0.98364  | -5.41976 | 4.62945  | 1.00270  |
| H  | -4.68061 | 2.56830  | 1.53343  | -4.35254 | 2.95935  | 1.85715  | -4.33207 | 2.98912  | 1.88529  |
| C  | -4.40715 | 5.58913  | -0.88966 | -4.61599 | 5.37114  | -1.17348 | -4.65915 | 5.34641  | -1.18084 |
| H  | -2.57309 | 4.68362  | -1.56797 | -2.91850 | 4.30833  | -1.97114 | -2.98070 | 4.26739  | -1.99625 |
| C  | -5.49501 | 5.48952  | -0.01569 | -5.51619 | 5.48601  | -0.10891 | -5.53909 | 5.47946  | -0.10102 |
| H  | -6.42890 | 4.32466  | 1.54393  | -6.10980 | 4.70732  | 1.81544  | -6.09503 | 4.73264  | 1.84666  |
| H  | -4.33395 | 6.42724  | -1.57590 | -4.69510 | 6.03508  | -2.02889 | -4.75313 | 5.99818  | -2.04415 |
| H  | -6.26375 | 6.25627  | -0.01518 | -6.29070 | 6.24651  | -0.13137 | -6.31241 | 6.24125  | -0.12028 |
| Ag | 0.00000  | 0.00000  | 0.07972  | 0.00603  | 0.00001  | 0.11470  | 0.00719  | 0.00000  | 0.12392  |
| H  | 0.00000  | 0.00000  | 2.12068  | 0.14189  | 0.00050  | 2.07733  | 0.12250  | 0.00001  | 2.06543  |

### H-AgTTP, total charge -1

|   | Doublet  |          |          | Quartet  |          |          | Sextet   |          |          |
|---|----------|----------|----------|----------|----------|----------|----------|----------|----------|
| N | -2.11036 | -0.00151 | -0.31594 | 0.00574  | -2.12570 | -0.08183 | -0.29566 | 2.11955  | -0.08445 |
| N | -0.00992 | 2.09753  | 0.02273  | -2.11796 | -0.00684 | -0.05329 | 2.12016  | 0.29704  | -0.05179 |
| N | 2.09769  | 0.00155  | 0.11615  | -0.00581 | 2.12522  | 0.01779  | 0.29915  | -2.11810 | 0.00072  |
| N | -0.00672 | -2.09755 | 0.02268  | 2.11789  | 0.00467  | -0.05347 | -2.11766 | -0.29724 | 0.03320  |

|   |          |          |          |          |          |          |          |          |          |
|---|----------|----------|----------|----------|----------|----------|----------|----------|----------|
| C | -2.90725 | -1.09845 | -0.19469 | 1.12614  | -2.91996 | -0.03329 | -1.51400 | 2.75332  | 0.00966  |
| C | -4.30213 | -0.68452 | -0.02032 | 0.70494  | -4.28623 | 0.03878  | -1.27890 | 4.15579  | 0.16125  |
| C | -4.30316 | 0.67810  | -0.02020 | -0.68168 | -4.29001 | 0.03878  | 0.09530  | 4.34774  | 0.15452  |
| C | -2.90894 | 1.09419  | -0.19470 | -1.11033 | -2.92605 | -0.03323 | 0.70372  | 3.06276  | 0.00123  |
| C | -2.46226 | 2.44047  | -0.14951 | -2.47013 | -2.46427 | -0.02414 | 2.11146  | 2.79422  | -0.02715 |
| C | -1.11668 | 2.88818  | -0.09353 | -2.90903 | -1.13358 | -0.02750 | 2.75653  | 1.51633  | -0.07564 |
| C | -0.69871 | 4.28022  | -0.22121 | -4.30005 | -0.69570 | -0.02847 | 4.16654  | 1.28281  | -0.15593 |
| C | 0.66634  | 4.29029  | -0.18548 | -4.30490 | 0.66653  | -0.02637 | 4.35938  | -0.09019 | -0.14561 |
| C | 1.09227  | 2.90255  | -0.05037 | -2.91689 | 1.11468  | -0.04613 | 3.06662  | -0.70139 | -0.08329 |
| C | 2.43679  | 2.45501  | -0.06273 | -2.48531 | 2.44797  | -0.05241 | 2.79660  | -2.10583 | -0.02535 |
| C | 2.88115  | 1.10807  | -0.05362 | -1.12619 | 2.91524  | -0.06599 | 1.52030  | -2.75226 | 0.01964  |
| C | 4.24924  | 0.68644  | -0.31917 | -0.70497 | 4.27491  | -0.21766 | 1.29076  | -4.16451 | 0.03946  |
| C | 4.25025  | -0.68010 | -0.31923 | 0.68166  | 4.27864  | -0.21803 | -0.08224 | -4.35951 | 0.04878  |
| C | 2.88281  | -1.10380 | -0.05363 | 1.11028  | 2.92132  | -0.06597 | -0.69684 | -3.06743 | 0.01059  |
| C | 2.44050  | -2.45142 | -0.06276 | 2.47191  | 2.46142  | -0.05238 | -2.10330 | -2.79729 | -0.02543 |
| C | 1.09665  | -2.90097 | -0.05040 | 2.91070  | 1.13050  | -0.04618 | -2.74644 | -1.51734 | -0.06339 |
| C | 0.67272  | -4.28933 | -0.18538 | 4.30113  | 0.68995  | -0.02684 | -4.14552 | -1.28507 | -0.25338 |
| C | -0.69235 | -4.28126 | -0.22111 | 4.30371  | -0.67228 | -0.02869 | -4.33905 | 0.08814  | -0.25916 |
| C | -1.11234 | -2.88981 | -0.09356 | 2.91508  | -1.11775 | -0.02769 | -3.05941 | 0.69990  | -0.07008 |
| C | -2.45856 | -2.44406 | -0.14953 | 2.48341  | -2.45080 | -0.02428 | -2.79467 | 2.10851  | -0.02418 |
| H | -5.14946 | -1.34037 | 0.12643  | 1.35877  | -5.14478 | 0.09743  | -2.03935 | 4.91482  | 0.27484  |
| H | -5.15149 | 1.33264  | 0.12665  | -1.33079 | -5.15214 | 0.09741  | 0.62032  | 5.28589  | 0.26249  |
| H | -1.35408 | 5.12965  | -0.35560 | -5.15923 | -1.35154 | -0.03407 | 4.92938  | 2.04535  | -0.21908 |
| H | 1.31539  | 5.15161  | -0.26017 | -5.16898 | 1.31563  | -0.01326 | 5.30393  | -0.61382 | -0.17718 |
| H | 5.08415  | 1.34300  | -0.52177 | -1.35932 | 5.12677  | -0.33720 | 2.05579  | -4.92760 | 0.03343  |
| H | 5.08615  | -1.33540 | -0.52187 | 1.33136  | 5.13401  | -0.33783 | -0.60284 | -5.30580 | 0.07397  |
| H | 1.32301  | -5.14972 | -0.25998 | 5.16165  | 1.34378  | -0.01395 | -4.89700 | -2.04848 | -0.39528 |
| H | -1.34648 | -5.13164 | -0.35541 | 5.16646  | -1.32341 | -0.03434 | -5.27240 | 0.61245  | -0.40576 |
| C | 3.50457  | 3.49924  | -0.16676 | -3.53799 | 3.50882  | -0.06399 | 3.98647  | -3.00565 | -0.02024 |
| C | 4.41026  | 3.70098  | 0.88853  | -3.67676 | 4.39389  | 1.01993  | 4.30117  | -3.77565 | 1.11280  |
| C | 3.64464  | 4.28818  | -1.32126 | -4.40921 | 3.65988  | -1.15660 | 4.82018  | -3.10828 | -1.14714 |
| C | 5.41961  | 4.66331  | 0.79734  | -4.65963 | 5.38619  | 1.01872  | 5.41479  | -4.61948 | 1.12114  |
| H | 4.31276  | 3.09257  | 1.78300  | -3.00317 | 4.29087  | 1.86560  | 3.66158  | -3.70319 | 1.98743  |
| C | 4.65232  | 5.25161  | -1.41653 | -5.39581 | 4.65053  | -1.16120 | 5.93314  | -3.95319 | -1.14283 |
| H | 2.95608  | 4.13273  | -2.14659 | -4.30234 | 2.99047  | -2.00525 | 4.58379  | -2.51815 | -2.02760 |
| C | 5.54465  | 5.44433  | -0.35637 | -5.52620 | 5.51862  | -0.07276 | 6.23625  | -4.71253 | -0.00760 |
| H | 6.10677  | 4.80378  | 1.62809  | -4.75197 | 6.05399  | 1.87181  | 5.64222  | -5.20202 | 2.01052  |
| H | 4.74392  | 5.84741  | -2.32137 | -6.05768 | 4.74746  | -2.01844 | 6.56141  | -4.02062 | -2.02762 |
| H | 6.32945  | 6.19293  | -0.42949 | -6.29170 | 6.29047  | -0.07497 | 7.10237  | -5.36941 | -0.00267 |
| C | -3.51974 | 3.49689  | -0.14226 | -3.52146 | -3.52743 | 0.00507  | 3.00765  | 3.98388  | 0.00738  |
| C | -3.64391 | 4.38970  | 0.93716  | -4.34499 | -3.70231 | 1.13016  | 3.89340  | 4.19193  | 1.08013  |
| C | -4.42386 | 3.62178  | -1.21191 | -3.70909 | -4.38484 | -1.09297 | 2.98978  | 4.93224  | -1.03133 |
| C | -4.63525 | 5.37398  | 0.94728  | -5.33291 | -4.69138 | 1.15370  | 4.73094  | 5.30932  | 1.11496  |
| H | -2.95584 | 4.29673  | 1.77211  | -4.20055 | -3.05191 | 1.98798  | 3.91365  | 3.46688  | 1.88811  |
| C | -5.41572 | 4.60580  | -1.20599 | -4.69309 | -5.37625 | -1.07285 | 3.82988  | 6.04791  | -1.00161 |
| H | -4.33620 | 2.93781  | -2.05090 | -3.07323 | -4.26178 | -1.96488 | 2.30912  | 4.78146  | -1.86385 |
| C | -5.52632 | 5.48755  | -0.12545 | -5.51170 | -5.53336 | 0.05162  | 4.70454  | 6.24290  | 0.07300  |
| H | -4.71502 | 6.04878  | 1.79604  | -5.95835 | -4.80714 | 2.03557  | 5.40183  | 5.45265  | 1.95844  |
| H | -6.10009 | 4.68565  | -2.04708 | -4.82383 | -6.02350 | -1.93672 | 3.80322  | 6.76363  | -1.81967 |
| H | -6.29814 | 6.25304  | -0.11881 | -6.27829 | -6.30395 | 0.06848  | 5.35723  | 7.11182  | 0.09833  |
| C | -3.51449 | -3.50204 | -0.14231 | 3.54038  | -3.50836 | 0.00495  | -3.98566 | 3.00059  | -0.02000 |
| C | -3.63732 | -4.39507 | 0.93706  | 4.36460  | -3.67909 | 1.13017  | -4.94477 | 2.92081  | 1.00709  |
| C | -4.41844 | -3.62819 | -1.21196 | 3.73251  | -4.36482 | -1.09305 | -4.18904 | 3.94600  | -1.04264 |
| C | -4.62723 | -5.38082 | 0.94715  | 5.35755  | -4.66311 | 1.15384  | -6.06289 | 3.75745  | 1.01487  |
| H | -2.94937 | -4.30115 | 1.77200  | 4.21668  | -3.02950 | 1.98802  | -4.79847 | 2.19531  | 1.80148  |
| C | -5.40885 | -4.61367 | -1.20607 | 4.72154  | -5.35121 | -1.07281 | -5.30971 | 4.77950  | -1.04048 |
| H | -4.33180 | -2.94404 | -2.05090 | 3.09610  | -4.24504 | -1.96502 | -3.45772 | 4.01504  | -1.84217 |
| C | -5.51814 | -5.49564 | -0.12557 | 5.54080  | -5.50414 | 0.05177  | -6.25253 | 4.69110  | -0.01023 |
| H | -4.70599 | -6.05578 | 1.79587  | 5.98341  | -4.77572 | 2.03581  | -6.78502 | 3.68243  | 1.82423  |
| H | -6.09313 | -4.69448 | -2.04715 | 4.85568  | -5.99779 | -1.93665 | -5.44866 | 5.49590  | -1.84651 |
| H | -6.28884 | -6.26225 | -0.11896 | 6.31127  | -6.27085 | 0.06875  | -7.12384 | 5.34106  | -0.00636 |
| C | 3.50987  | -3.49402 | -0.16677 | 3.51902  | 3.52777  | -0.06400 | -3.00669 | -3.98168 | -0.05365 |
| C | 4.41580  | -3.69443 | 0.88856  | 3.65328  | 4.41352  | 1.01993  | -2.97766 | -4.89346 | -1.12425 |
| C | 3.65123  | -4.28268 | -1.32131 | 4.38978  | 3.68296  | -1.15641 | -3.92054 | -4.21356 | 0.99031  |
| C | 5.42662  | -4.65522 | 0.79741  | 4.63122  | 5.41067  | 1.01881  | -3.83106 | -5.99919 | -1.15069 |
| H | 4.31732  | -3.08620 | 1.78305  | 2.98013  | 4.30716  | 1.86553  | -2.27953 | -4.72149 | -1.93789 |
| C | 4.66039  | -5.24458 | -1.41654 | 5.37145  | 4.67849  | -1.16092 | -4.77140 | -5.32108 | 0.96900  |
| H | 2.96252  | -4.12823 | -2.14669 | 4.28648  | 3.01286  | -2.00495 | -3.95309 | -3.51352 | 1.81974  |
| C | 5.55293  | -5.43600 | -0.35632 | 5.49731  | 5.54733  | -0.07253 | -4.73152 | -6.21986 | -0.10280 |
| H | 6.11393  | -4.79467 | 1.62820  | 4.72014  | 6.07896  | 1.87188  | -3.79530 | -6.68634 | -1.99255 |

|    |          |          |          |          |          |          |          |          |          |
|----|----------|----------|----------|----------|----------|----------|----------|----------|----------|
| H  | 4.75296  | -5.84019 | -2.32141 | 6.03305  | 4.77857  | -2.01801 | -5.46419 | -5.48337 | 1.79109  |
| H  | 6.33886  | -6.18341 | -0.42942 | 6.25901  | 6.32293  | -0.07465 | -5.39466 | -7.08099 | -0.12159 |
| Ag | 0.05036  | -0.00011 | 1.05916  | -0.00002 | -0.00386 | 0.18670  | 0.00323  | 0.00330  | 0.13980  |
| H  | -0.98907 | -0.00040 | 2.31656  | 0.00034  | -0.07629 | 2.03111  | 0.04350  | 0.05397  | 2.01709  |

|   | AITPP, total charge 0 |          |          | AITPP, total charge 1 |          |          | H-AITPP, total charge 0 |          |          |
|---|-----------------------|----------|----------|-----------------------|----------|----------|-------------------------|----------|----------|
|   | Doublet               |          |          | Singlet               |          |          | Singlet                 |          |          |
| N | 0.00355               | -1.95416 | 0.15436  | 0.00355               | -1.95416 | 0.15436  | 0.00037                 | 2.00370  | 0.02511  |
| N | -1.94185              | -0.00346 | -0.14818 | -1.94185              | -0.00346 | -0.14818 | 1.99683                 | -0.00037 | 0.00992  |
| N | -0.00354              | 1.95424  | 0.15460  | -0.00354              | 1.95424  | 0.15460  | -0.00037                | -2.00370 | 0.02511  |
| N | 1.94186               | 0.00357  | -0.14817 | 1.94186               | 0.00357  | -0.14817 | -1.99683                | 0.00037  | 0.00992  |
| C | 1.11434               | -2.79671 | 0.29722  | 1.11434               | -2.79671 | 0.29722  | -1.09877                | 2.84317  | 0.03899  |
| C | 0.69918               | -4.10532 | 0.63008  | 0.69918               | -4.10532 | 0.63008  | -0.68006                | 4.22063  | 0.09400  |
| C | -0.68470              | -4.10793 | 0.62896  | -0.68470              | -4.10793 | 0.62896  | 0.68161                 | 4.22038  | 0.09414  |
| C | -1.10426              | -2.80089 | 0.29544  | -1.10426              | -2.80089 | 0.29544  | 1.09982                 | 2.84276  | 0.03921  |
| C | -2.43767              | -2.42492 | 0.01064  | -2.43767              | -2.42492 | 0.01064  | 2.43789                 | 2.43922  | -0.00723 |
| C | -2.79234              | -1.11985 | -0.25931 | -2.79234              | -1.11985 | -0.25931 | 2.83288                 | 1.09876  | -0.06667 |
| C | -4.12655              | -0.68605 | -0.58998 | -4.12655              | -0.68605 | -0.58998 | 4.20204                 | 0.68003  | -0.22699 |
| C | -4.12915              | 0.67158  | -0.58866 | -4.12915              | 0.67158  | -0.58866 | 4.20178                 | -0.68155 | -0.22714 |
| C | -2.79654              | 1.10988  | -0.25755 | -2.79654              | 1.10988  | -0.25755 | 2.83246                 | -1.09980 | -0.06689 |
| C | -2.44665              | 2.41597  | 0.01376  | -2.44665              | 2.41597  | 0.01376  | 2.43698                 | -2.44012 | -0.00762 |
| C | -1.11433              | 2.79678  | 0.29732  | -1.11433              | 2.79678  | 0.29732  | 1.09877                 | -2.84317 | 0.03899  |
| C | -0.69919              | 4.10537  | 0.63032  | -0.69919              | 4.10537  | 0.63032  | 0.68006                 | -4.22063 | 0.09399  |
| C | 0.68472               | 4.10801  | 0.62907  | 0.68472               | 4.10801  | 0.62907  | -0.68161                | -4.22038 | 0.09415  |
| C | 1.10426               | 2.80096  | 0.29556  | 1.10426               | 2.80096  | 0.29556  | -1.09982                | -2.84277 | 0.03921  |
| C | 2.43769               | 2.42502  | 0.01069  | 2.43769               | 2.42502  | 0.01069  | -2.43789                | -2.43922 | -0.00724 |
| C | 2.79236               | 1.11996  | -0.25931 | 2.79236               | 1.11996  | -0.25931 | -2.83288                | -1.09876 | -0.06667 |
| C | 4.12658               | 0.68615  | -0.58988 | 4.12658               | 0.68615  | -0.58988 | -4.20204                | -0.68003 | -0.22698 |
| C | 4.12914               | -0.67148 | -0.58872 | 4.12914               | -0.67148 | -0.58872 | -4.20178                | 0.68155  | -0.22714 |
| C | 2.79655               | -1.10977 | -0.25752 | 2.79655               | -1.10977 | -0.25752 | -2.83246                | 1.09980  | -0.06689 |
| C | 2.44664               | -2.41587 | 0.01373  | 2.44664               | -2.41587 | 0.01373  | -2.43698                | 2.44012  | -0.00762 |
| H | 1.36321               | -4.93603 | 0.81639  | 1.36321               | -4.93603 | 0.81639  | -1.34587                | 5.06980  | 0.13168  |
| H | -1.34591              | -4.94113 | 0.81420  | -1.34591              | -4.94113 | 0.81420  | 1.34773                 | 5.06930  | 0.13197  |
| H | -4.95474              | -1.35297 | -0.77884 | -4.95474              | -1.35297 | -0.77884 | 5.04375                 | 1.34686  | -0.34053 |
| H | -4.95987              | 1.33572  | -0.77620 | -4.95987              | 1.33572  | -0.77620 | 5.04324                 | -1.34868 | -0.34082 |
| H | -1.36319              | 4.93608  | 0.81670  | -1.36319              | 4.93608  | 0.81670  | 1.34587                 | -5.06980 | 0.13167  |
| H | 1.34590               | 4.94123  | 0.81429  | 1.34590               | 4.94123  | 0.81429  | -1.34772                | -5.06931 | 0.13198  |
| H | 4.95478               | 1.35309  | -0.77862 | 4.95478               | 1.35309  | -0.77862 | -5.04375                | -1.34687 | -0.34052 |
| H | 4.95987               | -1.33560 | -0.77635 | 4.95987               | -1.33560 | -0.77635 | -5.04324                | 1.34868  | -0.34083 |
| C | -3.49943              | 3.47491  | 0.00184  | -3.49943              | 3.47491  | 0.00184  | 3.50038                 | -3.49217 | -0.01845 |
| C | -4.52267              | 3.47926  | 0.96321  | -4.52267              | 3.47926  | 0.96321  | 3.69366                 | -4.30626 | -1.14534 |
| C | -3.48415              | 4.48904  | -0.96991 | -3.48415              | 4.48904  | -0.96991 | 4.32649                 | -3.67820 | -1.10090 |
| C | -5.51000              | 4.46847  | 0.95108  | -5.51000              | 4.46847  | 0.95108  | 4.69088                 | -5.28509 | -1.15358 |
| H | -4.53638              | 2.70245  | 1.72234  | -4.53638              | 2.70245  | 1.72234  | 3.06010                 | -4.16361 | -2.01612 |
| C | -4.47155              | 5.47668  | -0.98577 | -4.47155              | 5.47668  | -0.98577 | 5.32232                 | -4.65842 | 1.09503  |
| H | -2.69384              | 4.49397  | -1.71496 | -2.69384              | 4.49397  | -1.71496 | 4.17948                 | -3.05206 | 1.97622  |
| C | -5.48794              | 5.46970  | -0.02437 | -5.48794              | 5.46970  | -0.02437 | 5.50764                 | -5.46443 | -0.03265 |
| H | -6.29268              | 4.45808  | 1.70455  | -6.29268              | 4.45808  | 1.70455  | 4.83084                 | -5.90439 | -2.03518 |
| H | -4.44888              | 6.24934  | -1.74926 | -4.44888              | 6.24934  | -1.74926 | 5.95063                 | -4.79319 | 1.97099  |
| H | -6.25522              | 6.23862  | -0.03538 | -6.25522              | 6.23862  | -0.03538 | 6.28237                 | -6.22585 | -0.03807 |
| C | -3.48623              | -3.48804 | -0.00339 | -3.48623              | -3.48804 | -0.00339 | 3.50169                 | 3.49086  | -0.01778 |
| C | -4.51017              | -3.49778 | 0.95716  | -4.51017              | -3.49778 | 0.95716  | 4.32773                 | 3.67641  | 1.10170  |
| C | -3.46589              | -4.50101 | -0.97627 | -3.46589              | -4.50101 | -0.97627 | 3.69545                 | 4.30502  | -1.14455 |
| C | -5.49339              | -4.49106 | 0.94305  | -5.49339              | -4.49106 | 0.94305  | 5.32395                 | 4.65623  | 1.09608  |
| H | -4.52768              | -2.72198 | 1.71724  | -4.52768              | -2.72198 | 1.71724  | 4.18036                 | 3.05022  | 1.97692  |
| C | -4.44917              | -5.49270 | -0.99411 | -4.44917              | -5.49270 | -0.99411 | 4.69307                 | 5.28345  | -1.15252 |
| H | -2.67493              | -4.50179 | -1.72066 | -2.67493              | -4.50179 | -1.72066 | 3.06196                 | 4.16273  | -2.01543 |
| C | -5.46639              | -5.49103 | -0.03356 | -5.46639              | -5.49103 | -0.03356 | 5.50975                 | 5.46232  | -0.03147 |
| H | -6.27671              | -4.48482 | 1.69591  | -6.27671              | -4.48482 | 1.69591  | 5.95220                 | 4.79064  | 1.97215  |
| H | -4.42269              | -6.26440 | -1.75846 | -4.42269              | -6.26440 | -1.75846 | 4.83339                 | 5.90280  | -2.03403 |
| H | -6.23045              | -6.26313 | -0.04609 | -6.23045              | -6.26313 | -0.04609 | 6.28479                 | 6.22343  | -0.03669 |
| C | 3.49937               | -3.47488 | 0.00182  | 3.49937               | -3.47488 | 0.00182  | -3.50037                | 3.49217  | -0.01845 |
| C | 4.52239               | -3.47950 | 0.96340  | 4.52239               | -3.47950 | 0.96340  | -4.32648                | 3.67820  | 1.10091  |
| C | 3.48413               | -4.48889 | -0.97007 | 3.48413               | -4.48889 | -0.97007 | -3.69367                | 4.30625  | -1.14535 |
| C | 5.50963               | -4.46881 | 0.95129  | 5.50963               | -4.46881 | 0.95129  | -5.32231                | 4.65842  | 1.09503  |
| H | 4.53602               | -2.70285 | 1.72269  | 4.53602               | -2.70285 | 1.72269  | -4.17947                | 3.05207  | 1.97623  |
| C | 4.47142               | -5.47661 | -0.98592 | 4.47142               | -5.47661 | -0.98592 | -4.69089                | 5.28508  | -1.15358 |
| H | 2.69395               | -4.49358 | -1.71527 | 2.69395               | -4.49358 | -1.71527 | -3.06011                | 4.16359  | -2.01613 |

|    |         |          |          |         |          |          |          |          |          |
|----|---------|----------|----------|---------|----------|----------|----------|----------|----------|
| C  | 5.48765 | -5.46986 | -0.02433 | 5.48765 | -5.46986 | -0.02433 | -5.50764 | 5.46443  | -0.03265 |
| H  | 6.29217 | -4.45863 | 1.70492  | 6.29217 | -4.45863 | 1.70492  | -5.95061 | 4.79320  | 1.97100  |
| H  | 4.44886 | -6.24917 | -1.74952 | 4.44886 | -6.24917 | -1.74952 | -4.83085 | 5.90437  | -2.03518 |
| H  | 6.25484 | -6.23888 | -0.03532 | 6.25484 | -6.23888 | -0.03532 | -6.28237 | 6.22585  | -0.03807 |
| C  | 3.48629 | 3.48807  | -0.00337 | 3.48629 | 3.48807  | -0.00337 | -3.50169 | -3.49086 | -0.01778 |
| C  | 4.51048 | 3.49755  | 0.95694  | 4.51048 | 3.49755  | 0.95694  | -3.69546 | -4.30502 | -1.14455 |
| C  | 3.46587 | 4.50119  | -0.97608 | 3.46587 | 4.50119  | -0.97608 | -4.32773 | -3.67641 | 1.10170  |
| C  | 5.49378 | 4.49074  | 0.94280  | 5.49378 | 4.49074  | 0.94280  | -4.69308 | -5.28345 | -1.15252 |
| H  | 4.52811 | 2.72158  | 1.71685  | 4.52811 | 2.72158  | 1.71685  | -3.06196 | -4.16273 | -2.01543 |
| C  | 4.44923 | 5.49281  | -0.99396 | 4.44923 | 5.49281  | -0.99396 | -5.32395 | -4.65623 | 1.09609  |
| H  | 2.67474 | 4.50220  | -1.72030 | 2.67474 | 4.50220  | -1.72030 | -4.18036 | -3.05021 | 1.97692  |
| C  | 5.46665 | 5.49089  | -0.03363 | 5.46665 | 5.49089  | -0.03363 | -5.50976 | -5.46231 | -0.03146 |
| H  | 6.27728 | 4.48428  | 1.69547  | 6.27728 | 4.48428  | 1.69547  | -4.83340 | -5.90280 | -2.03402 |
| H  | 4.42263 | 6.26463  | -1.75818 | 4.42263 | 6.26463  | -1.75818 | -5.95220 | -4.79063 | 1.97215  |
| H  | 6.23079 | 6.26291  | -0.04620 | 6.23079 | 6.26291  | -0.04620 | -6.28479 | -6.22342 | -0.03668 |
| Al | 0.00001 | -0.00004 | 0.00090  | 0.00001 | -0.00004 | 0.00090  | 0.00000  | 0.00000  | 0.49828  |
| H  |         |          |          |         |          |          | 0.00000  | 0.00000  | 2.09151  |

### BaTPP, total charge 0

|   | Singlet  |          |          | Triplet  |          |          | Quintet  |          |          |
|---|----------|----------|----------|----------|----------|----------|----------|----------|----------|
| N | -2.10447 | -0.00003 | 0.02392  | -2.16991 | -0.00810 | -0.05013 | -0.00031 | -2.09428 | -0.08988 |
| N | -0.00307 | 2.11470  | 0.10878  | -0.00804 | 2.09835  | 0.11768  | -2.18533 | 0.00030  | 0.09784  |
| N | 2.11878  | 0.00003  | 0.18517  | 2.16990  | 0.00826  | -0.05013 | 0.00029  | 2.09424  | -0.08981 |
| N | -0.00300 | -2.11470 | 0.10878  | 0.00809  | -2.09835 | 0.11822  | 2.18533  | -0.00033 | 0.09788  |
| C | -2.90750 | -1.10819 | -0.07419 | -2.88114 | -1.11440 | 0.33892  | 1.10764  | -2.89665 | 0.08372  |
| C | -4.29493 | -0.68302 | -0.18356 | -4.08985 | -0.70960 | 0.98137  | 0.68629  | -4.23440 | 0.44793  |
| C | -4.29495 | 0.68290  | -0.18355 | -4.09508 | 0.67911  | 0.98104  | -0.68749 | -4.23422 | 0.44791  |
| C | -2.90753 | 1.10810  | -0.07419 | -2.88945 | 1.09263  | 0.33833  | -1.10848 | -2.89634 | 0.08374  |
| C | -2.45897 | 2.45564  | -0.09858 | -2.45803 | 2.46525  | 0.15494  | -2.46468 | -2.47044 | -0.12982 |
| C | -1.11130 | 2.90331  | -0.07171 | -1.12036 | 2.90034  | -0.01392 | -2.88170 | -1.10621 | -0.32154 |
| C | -0.68712 | 4.27273  | -0.31816 | -0.69798 | 4.26338  | -0.31116 | -4.08233 | -0.68550 | -1.01387 |
| C | 0.67842  | 4.27632  | -0.30319 | 0.66615  | 4.26843  | -0.31066 | -4.08216 | 0.68665  | -1.01383 |
| C | 1.10468  | 2.90571  | -0.06335 | 1.09842  | 2.90860  | -0.01325 | -2.88138 | 1.10701  | -0.32155 |
| C | 2.45019  | 2.45409  | -0.08513 | 2.43920  | 2.48352  | 0.15647  | -2.46396 | 2.47111  | -0.12983 |
| C | 2.89756  | 1.10746  | -0.04020 | 2.88118  | 1.11454  | 0.33884  | -1.10765 | 2.89663  | 0.08375  |
| C | 4.25106  | 0.68266  | -0.36280 | 4.08990  | 0.70977  | 0.98128  | -0.68630 | 4.23443  | 0.44777  |
| C | 4.25108  | -0.68253 | -0.36280 | 4.09508  | -0.67894 | 0.98106  | 0.68748  | 4.23423  | 0.44780  |
| C | 2.89760  | -1.10737 | -0.04021 | 2.88946  | -1.09249 | 0.33835  | 1.10846  | 2.89631  | 0.08379  |
| C | 2.45026  | -2.45402 | -0.08513 | 2.45808  | -2.46515 | 0.15515  | 2.46465  | 2.47041  | -0.12976 |
| C | 1.10477  | -2.90568 | -0.06335 | 1.12039  | -2.90033 | -0.01347 | 2.88169  | 1.10619  | -0.32151 |
| C | 0.67854  | -4.27630 | -0.30318 | 0.69801  | -4.26334 | -0.31077 | 4.08236  | 0.68551  | -1.01378 |
| C | -0.68700 | -4.27275 | -0.31815 | -0.66612 | -4.26840 | -0.31026 | 4.08217  | -0.68664 | -1.01380 |
| C | -1.11122 | -2.90335 | -0.07171 | -1.09841 | -2.90858 | -0.01283 | 2.88137  | -1.10703 | -0.32156 |
| C | -2.45889 | -2.45571 | -0.09858 | -2.43918 | -2.48343 | 0.15672  | 2.46396  | -2.47113 | -0.12987 |
| H | -5.15226 | -1.33638 | -0.25958 | -4.82805 | -1.36825 | 1.41687  | 1.34132  | -5.06186 | 0.68032  |
| H | -5.15230 | 1.33623  | -0.25957 | -4.83824 | 1.33243  | 1.41611  | -1.34275 | -5.06150 | 0.68030  |
| H | -1.34267 | 5.10977  | -0.51223 | -1.35389 | 5.10022  | -0.50455 | -4.79815 | -1.34569 | -1.48246 |
| H | 1.33141  | 5.12065  | -0.47062 | 1.31599  | 5.11014  | -0.50348 | -4.79781 | 1.34706  | -1.48238 |
| H | 5.07291  | 1.33944  | -0.61041 | 4.82810  | 1.36845  | 1.41672  | -1.34134 | 5.06194  | 0.68001  |
| H | 5.07295  | -1.33929 | -0.61041 | 4.83820  | -1.33224 | 1.41625  | 1.34274  | 5.06155  | 0.68006  |
| H | 1.33157  | -5.12062 | -0.47061 | 1.35392  | -5.10018 | -0.50419 | 4.79820  | 1.34572  | -1.48229 |
| H | -1.34251 | -5.10982 | -0.51222 | -1.31595 | -5.11009 | -0.50315 | 4.79783  | -1.34704 | -1.48235 |
| C | 3.51365  | 3.49203  | -0.28297 | 3.49734  | 3.52322  | 0.23411  | -3.51339 | 3.51026  | -0.24379 |
| C | 4.40917  | 3.79973  | 0.75321  | 3.39328  | 4.61028  | 1.12274  | -4.72122 | 3.39177  | 0.47470  |
| C | 3.65382  | 4.15933  | -1.51052 | 4.65099  | 3.42642  | -0.56829 | -3.35338 | 4.63071  | -1.08496 |
| C | 5.41312  | 4.75522  | 0.57279  | 4.40039  | 5.57477  | 1.19547  | -5.72132 | 4.35867  | 0.36795  |
| H | 4.31410  | 3.28249  | 1.70398  | 2.52575  | 4.68031  | 1.77140  | -4.86416 | 2.53378  | 1.12498  |
| C | 4.65742  | 5.11378  | -1.69475 | 5.65056  | 4.39727  | -0.50617 | -4.35645 | 5.59398  | -1.19758 |
| H | 2.97308  | 3.91831  | -2.32179 | 4.75198  | 2.58246  | -1.24376 | -2.44194 | 4.72740  | -1.66649 |
| C | 5.53998  | 5.41629  | -0.65273 | 5.52986  | 5.47633  | 0.37718  | -5.54421 | 5.46598  | -0.46893 |
| H | 6.09502  | 4.98188  | 1.38787  | 4.30564  | 6.39878  | 1.89723  | -6.63874 | 4.24907  | 0.93985  |
| H | 4.75287  | 5.61656  | -2.65324 | 6.52590  | 4.31064  | -1.14396 | -4.21417 | 6.44171  | -1.86224 |
| H | 6.32078  | 6.15798  | -0.79559 | 6.31218  | 6.22804  | 0.43203  | -6.32377 | 6.21745  | -0.55562 |
| C | -3.50671 | 3.51665  | -0.24194 | -3.52438 | 3.49653  | 0.23080  | -3.51443 | -3.50927 | -0.24372 |
| C | -3.75413 | 4.42319  | 0.80145  | -3.42958 | 4.58555  | 1.11811  | -4.72211 | -3.39049 | 0.47498  |
| C | -4.25267 | 3.63875  | -1.42570 | -4.67691 | 3.38947  | -0.57197 | -3.35491 | -4.62966 | -1.08506 |
| C | -4.72414 | 5.42051  | 0.67018  | -4.44441 | 5.54204  | 1.18909  | -5.72252 | -4.35708 | 0.36829  |
| H | -3.17819 | 4.34137  | 1.71909  | -2.56305 | 4.66334  | 1.76722  | -4.86468 | -2.53254 | 1.12539  |

|    |          |          |          |          |          |          |          |          |          |
|----|----------|----------|----------|----------|----------|----------|----------|----------|----------|
| C  | -5.22198 | 4.63584  | -1.56080 | -5.68427 | 4.35233  | -0.51156 | -4.35830 | -5.59261 | -1.19762 |
| H  | -4.06126 | 2.94852  | -2.24211 | -4.77087 | 2.54386  | -1.24638 | -2.44362 | -4.72656 | -1.66678 |
| C  | -5.46230 | 5.52977  | -0.51237 | -5.57267 | 5.43350  | 0.37040  | -5.54589 | -5.46434 | -0.46874 |
| H  | -4.90299 | 6.11039  | 1.49042  | -4.35661 | 6.36767  | 1.88985  | -6.63981 | -4.24727 | 0.94036  |
| H  | -5.78547 | 4.71701  | -2.48627 | -6.55860 | 4.25781  | -1.14964 | -4.21640 | -6.44030 | -1.86242 |
| H  | -6.21570 | 6.30538  | -0.61692 | -6.36102 | 6.17898  | 0.42392  | -6.32570 | -6.21556 | -0.55540 |
| C  | -3.50660 | -3.51676 | -0.24194 | -3.49738 | -3.52306 | 0.23422  | 3.51342  | -3.51025 | -0.24380 |
| C  | -3.75401 | -4.42330 | 0.80145  | -3.39351 | -4.61013 | 1.12288  | 4.72120  | -3.39175 | 0.47477  |
| C  | -4.25256 | -3.63888 | -1.42570 | -4.65090 | -3.42623 | -0.56836 | 3.35355  | -4.63062 | -1.08511 |
| C  | -4.72398 | -5.42065 | 0.67018  | -4.40067 | -5.57457 | 1.19546  | 5.72135  | -4.35859 | 0.36803  |
| H  | -3.17807 | -4.34147 | 1.71910  | -2.52609 | -4.68019 | 1.77168  | 4.86404  | -2.53380 | 1.12513  |
| C  | -5.22184 | -4.63600 | -1.56081 | -5.65053 | -4.39703 | -0.50638 | 4.35668  | -5.59383 | -1.19771 |
| H  | -4.06117 | -2.94864 | -2.24211 | -4.75175 | -2.58229 | -1.24386 | 2.44218  | -4.72730 | -1.66674 |
| C  | -5.46213 | -5.52993 | -0.51237 | -5.53002 | -5.47609 | 0.37699  | 5.54437  | -5.46584 | -0.46894 |
| H  | -4.90282 | -6.11053 | 1.49042  | -4.30606 | -6.39858 | 1.89723  | 6.63872  | -4.24899 | 0.94001  |
| H  | -5.78532 | -4.71718 | -2.48628 | -6.52576 | -4.31036 | -1.14432 | 4.21450  | -6.44150 | -1.86247 |
| H  | -6.21552 | -6.30557 | -0.61693 | -6.31237 | -6.22777 | 0.43174  | 6.32397  | -6.21726 | -0.55564 |
| C  | 3.51376  | -3.49193 | -0.28297 | 3.52446  | -3.49639 | 0.23091  | 3.51439  | 3.50925  | -0.24368 |
| C  | 4.40929  | -3.79959 | 0.75320  | 4.67689  | -3.38934 | -0.57201 | 3.35471  | 4.62977  | -1.08481 |
| C  | 3.65394  | -4.15923 | -1.51052 | 3.42976  | -4.58544 | 1.11822  | 4.72218  | 3.39036  | 0.47479  |
| C  | 5.41327  | -4.75505 | 0.57278  | 5.68426  | -4.35219 | -0.51173 | 4.35808  | 5.59274  | -1.19739 |
| H  | 4.31421  | -3.28235 | 1.70398  | 4.77077  | -2.54372 | -1.24642 | 2.44330  | 4.72677  | -1.66633 |
| C  | 4.65757  | -5.11364 | -1.69475 | 4.44459  | -5.54193 | 1.18906  | 5.72258  | 4.35695  | 0.36808  |
| H  | 2.97319  | -3.91824 | -2.32178 | 2.56332  | -4.66323 | 1.76744  | 4.86486  | 2.53230  | 1.12503  |
| C  | 5.54015  | -5.41613 | -0.65273 | 5.57277  | -5.43338 | 0.37023  | 5.54580  | 5.46435  | -0.46875 |
| H  | 6.09518  | -4.98169 | 1.38786  | 6.55850  | -4.25766 | -1.14991 | 4.21605  | 6.44054  | -1.86202 |
| H  | 4.75303  | -5.61642 | -2.65323 | 4.35688  | -6.36757 | 1.88981  | 6.63997  | 4.24705  | 0.93996  |
| H  | 6.32097  | -6.15778 | -0.79559 | 6.36111  | -6.17887 | 0.42364  | 6.32559  | 6.21558  | -0.55542 |
| Ba | -0.04935 | 0.00000  | 1.61729  | -0.00003 | -0.00036 | -1.48550 | -0.00001 | -0.00005 | 1.52202  |

### BaTPP, total charge 1

|   | Doublet  |          | Quartet  |          |          | Sextet   |          |          |          |
|---|----------|----------|----------|----------|----------|----------|----------|----------|----------|
| N | -1.47654 | 1.46522  | -0.05164 | -0.00006 | -2.08672 | 0.05125  | 2.08180  | 0.02655  | -0.00340 |
| N | 1.49503  | 1.51937  | 0.07593  | -2.16266 | 0.00005  | 0.10585  | -0.00126 | -2.15405 | 0.12865  |
| N | 1.48574  | -1.47114 | 0.09805  | 0.00005  | 2.08671  | -0.05125 | -2.08172 | 0.02902  | -0.00337 |
| N | -1.50225 | -1.52838 | 0.15691  | 2.16265  | -0.00006 | 0.10586  | 0.00133  | 2.21409  | -0.11358 |
| C | -2.82979 | 1.25366  | 0.02029  | 1.10636  | -2.90263 | 0.03455  | 2.90444  | 1.10489  | 0.12094  |
| C | -3.51607 | 2.51941  | 0.19037  | 0.67693  | -4.28699 | 0.28514  | 4.25190  | 0.67669  | 0.43457  |
| C | -2.55525 | 3.49309  | 0.17938  | -0.67718 | -4.28695 | 0.28510  | 4.23768  | -0.69749 | 0.44391  |
| C | -1.28203 | 2.82196  | 0.00338  | -1.10653 | -2.90257 | 0.03453  | 2.89137  | -1.10626 | 0.13566  |
| C | -0.01747 | 3.47625  | -0.13473 | -2.43915 | -2.48028 | -0.14050 | 2.46123  | -2.44744 | -0.11323 |
| C | 1.25676  | 2.83721  | -0.20639 | -2.84654 | -1.09759 | -0.34024 | 1.10315  | -2.85436 | -0.28915 |
| C | 2.48446  | 3.47207  | -0.64753 | -4.01619 | -0.68705 | -1.07867 | 0.67700  | -4.07220 | -0.97879 |
| C | 3.45707  | 2.51238  | -0.62049 | -4.01616 | 0.68726  | -1.07866 | -0.68184 | -4.07140 | -0.97877 |
| C | 2.81982  | 1.28507  | -0.18585 | -2.84648 | 1.09773  | -0.34024 | -1.10652 | -2.85305 | -0.28912 |
| C | 3.46433  | 0.02020  | -0.09352 | -2.43902 | 2.48040  | -0.14048 | -2.46410 | -2.44452 | -0.11317 |
| C | 2.83942  | -1.25109 | 0.05403  | -1.10637 | 2.90262  | 0.03454  | -2.89264 | -1.10283 | 0.13571  |
| C | 3.54299  | -2.51877 | 0.03640  | -0.67696 | 4.28699  | 0.28508  | -4.23850 | -0.69246 | 0.44384  |
| C | 2.58972  | -3.49778 | 0.04605  | 0.67716  | 4.28695  | 0.28512  | -4.25109 | 0.68173  | 0.43444  |
| C | 1.30102  | -2.82834 | 0.04608  | 1.10652  | 2.90257  | 0.03454  | -2.90309 | 1.10833  | 0.12097  |
| C | 0.03597  | -3.47396 | -0.09765 | 2.43914  | 2.48028  | -0.14048 | -2.49287 | 2.48201  | -0.10427 |
| C | -1.23850 | -2.83246 | -0.16812 | 2.84653  | 1.09758  | -0.34022 | -1.14380 | 2.91503  | -0.30212 |
| C | -2.42960 | -3.45007 | -0.71564 | 4.01616  | 0.68705  | -1.07868 | -0.73395 | 4.10546  | -0.92292 |
| C | -3.40262 | -2.48995 | -0.72691 | 4.01612  | -0.68727 | -1.07869 | 0.73883  | 4.10458  | -0.92295 |
| C | -2.80680 | -1.28574 | -0.18582 | 2.84647  | -1.09774 | -0.34022 | 1.14728  | 2.91368  | -0.30212 |
| C | -3.46484 | -0.02032 | -0.11436 | 2.43901  | -2.48041 | -0.14047 | 2.49585  | 2.47906  | -0.10429 |
| H | -4.58071 | 2.65354  | 0.31275  | 1.33465  | -5.12701 | 0.45420  | 5.09382  | 1.32625  | 0.62461  |
| H | -2.70228 | 4.55722  | 0.29076  | -1.33495 | -5.12694 | 0.45413  | 5.06835  | -1.35980 | 0.63879  |
| H | 2.58360  | 4.49738  | -0.97199 | -4.71593 | -1.35051 | -1.56570 | 1.34001  | -4.78727 | -1.44348 |
| H | 4.49402  | 2.61893  | -0.90301 | -4.71586 | 1.35077  | -1.56568 | -1.34571 | -4.78568 | -1.44344 |
| H | 4.61533  | -2.64401 | -0.00248 | -1.33468 | 5.12701  | 0.45408  | -5.06996 | -1.35379 | 0.63862  |
| H | 2.75031  | -4.56539 | 0.03628  | 1.33491  | 5.12694  | 0.45416  | -5.09227 | 1.33230  | 0.62433  |
| H | -2.49763 | -4.45813 | -1.09717 | 4.71588  | 1.35051  | -1.56573 | -1.37236 | 4.86238  | -1.35546 |
| H | -4.40477 | -2.57526 | -1.12045 | 4.71580  | -1.35077 | -1.56574 | 1.37813  | 4.86072  | -1.35553 |
| C | 4.95242  | 0.00784  | -0.25753 | -3.51621 | 3.49364  | -0.23965 | -3.50251 | -3.49266 | -0.26996 |
| C | 5.78466  | -0.13262 | 0.86268  | -4.68626 | 3.35538  | 0.53381  | -3.41923 | -4.69211 | 0.46383  |
| C | 5.52888  | 0.12123  | -1.53166 | -3.41947 | 4.58615  | -1.12351 | -4.57497 | -3.32763 | -1.16827 |
| C | 7.17379  | -0.15146 | 0.71188  | -5.71125 | 4.29694  | 0.45009  | -4.38417 | -5.68897 | 0.31480  |
| H | 5.34389  | -0.22363 | 1.85163  | -4.78001 | 2.51083  | 1.21026  | -2.59953 | -4.83240 | 1.16272  |
| C | 6.91772  | 0.09653  | -1.68084 | -4.45263 | 5.51968  | -1.21665 | -5.53231 | -4.33025 | -1.32545 |



|    |          |          |          |          |          |          |          |          |          |
|----|----------|----------|----------|----------|----------|----------|----------|----------|----------|
| H  | 4.88736  | 0.22113  | -2.40248 | -2.54484 | 4.68153  | -1.75956 | -4.63822 | -2.41935 | -1.75935 |
| C  | 7.74286  | -0.03785 | -0.55996 | -5.59786 | 5.38254  | -0.42583 | -5.44341 | -5.51172 | -0.58148 |
| H  | 7.80886  | -0.25541 | 1.58659  | -6.59894 | 4.18366  | 1.06514  | -4.31055 | -6.60203 | 0.89802  |
| H  | 7.35325  | 0.18016  | -2.67206 | -4.36740 | 6.34829  | -1.91325 | -6.34424 | -4.19225 | -2.03323 |
| H  | 8.82210  | -0.05528 | -0.67712 | -6.39984 | 6.11093  | -0.49727 | -6.19138 | -6.28948 | -0.70204 |
| C  | -0.02914 | 4.95617  | -0.26889 | -3.51641 | -3.49345 | -0.23968 | 3.49838  | -3.49684 | -0.27003 |
| C  | 0.72733  | 5.75644  | 0.60794  | -4.68642 | -3.35516 | 0.53384  | 3.41380  | -4.69608 | 0.46397  |
| C  | -0.78142 | 5.58268  | -1.28036 | -3.41980 | -4.58590 | -1.12362 | 4.57088  | -3.33325 | -1.16856 |
| C  | 0.71655  | 7.14638  | 0.48824  | -5.71147 | -4.29665 | 0.45012  | 4.37752  | -5.69411 | 0.31493  |
| H  | 1.31152  | 5.28321  | 1.39151  | -4.78008 | -2.51065 | 1.21035  | 2.59406  | -4.83528 | 1.16303  |
| C  | -0.77333 | 6.97155  | -1.41175 | -4.45302 | -5.51937 | -1.21677 | 5.52698  | -4.33704 | -1.32574 |
| H  | -1.35036 | 4.97357  | -1.97586 | -2.54521 | -4.68129 | -1.75974 | 4.63510  | -2.42516 | -1.75983 |
| C  | -0.03047 | 7.75735  | -0.52433 | -5.59820 | -5.38220 | -0.42588 | 5.43681  | -5.51828 | -0.58156 |
| H  | 1.29206  | 7.75149  | 1.18221  | -6.59912 | -4.18335 | 1.06522  | 4.30292  | -6.60699 | 0.89832  |
| H  | -1.34395 | 7.43981  | -2.20802 | -4.36789 | -6.34792 | -1.91343 | 6.33895  | -4.20013 | -2.03370 |
| H  | -0.03098 | 8.83860  | -0.62327 | -6.40023 | -6.11054 | -0.49733 | 6.18383  | -6.29695 | -0.70213 |
| C  | -4.94215 | -0.03472 | -0.26445 | 3.51622  | -3.49364 | -0.23965 | 3.55064  | 3.50733  | -0.26568 |
| C  | -5.73262 | -0.83523 | 0.58247  | 4.68619  | -3.35547 | 0.53396  | 3.49915  | 4.70526  | 0.47629  |
| C  | -5.57758 | 0.72918  | -1.26216 | 3.41960  | -4.58603 | -1.12367 | 4.61317  | 3.32792  | -1.17319 |
| C  | -7.12110 | -0.85376 | 0.44984  | 5.71119  | -4.29701 | 0.45024  | 4.48017  | 5.68582  | 0.32301  |
| H  | -5.25229 | -1.43017 | 1.35342  | 4.77985  | -2.51101 | 1.21053  | 2.69418  | 4.85389  | 1.19088  |
| C  | -6.96440 | 0.69166  | -1.40723 | 4.45278  | -5.51954 | -1.21681 | 5.58695  | 4.31402  | -1.33411 |
| H  | -4.97614 | 1.32851  | -1.93839 | 2.54506  | -4.68132 | -1.75986 | 4.65990  | 2.41899  | -1.76503 |
| C  | -7.74037 | -0.09322 | -0.54757 | 5.59792  | -5.38250 | -0.42584 | 5.52687  | 5.49443  | -0.58474 |
| H  | -7.71870 | -1.46269 | -1.12142 | 6.59880  | -4.18380 | 1.06540  | 4.43113  | 6.59495  | 0.91497  |
| H  | -7.43889 | 1.27134  | -2.19319 | 4.36765  | -6.34805 | -1.91354 | 6.39068  | 4.16370  | -2.04872 |
| H  | -8.82038 | -0.11549 | -0.65716 | 6.39991  | -6.11087 | -0.49729 | 6.28914  | 6.25773  | -0.70742 |
| C  | 0.03442  | -4.94964 | -0.28995 | 3.51640  | 3.49345  | -0.23967 | -3.54647 | 3.51149  | -0.26569 |
| C  | 0.73008  | -5.54562 | -1.35773 | 3.41984  | 4.58584  | -1.12368 | -4.60935 | 3.33312  | -1.17299 |
| C  | -0.69543 | -5.77162 | 0.58827  | 4.68638  | 3.35521  | 0.53392  | -3.49349 | 4.70948  | 0.47607  |
| C  | 0.69840  | -6.92892 | -1.53845 | 4.45306  | 5.51930  | -1.21684 | -5.58202 | 4.32031  | -1.33395 |
| H  | 1.27297  | -4.91787 | -2.05753 | 2.54529  | 4.68118  | -1.75986 | -4.65724 | 2.42412  | -1.76462 |
| C  | -0.70814 | -7.15661 | 0.41821  | 5.71143  | 4.29670  | 0.45019  | -4.47340 | 5.69114  | 0.32275  |
| H  | -1.24222 | -5.31952 | 1.41048  | 4.78000  | 2.51075  | 1.21049  | -2.68824 | 4.85730  | 1.19051  |
| C  | -0.01377 | -7.73850 | -0.64734 | 5.59820  | 5.38219  | -0.42588 | -5.52045 | 5.50080  | -0.58481 |
| H  | 1.22609  | -7.37376 | -2.37668 | 4.36797  | 6.34781  | -1.91357 | -6.38604 | 4.17079  | -2.04840 |
| H  | -1.26243 | -7.77987 | 1.11341  | 6.59905  | 4.18344  | 1.06534  | -4.42323 | 6.60032  | 0.91454  |
| H  | -0.03155 | -8.81531 | -0.78539 | 6.40024  | 6.11052  | -0.49734 | -6.28186 | 6.26496  | -0.70751 |
| Ba | -0.01780 | 0.04823  | 1.63763  | 0.00000  | 0.00000  | 1.59892  | 0.00001  | -0.03716 | 1.63448  |

### H-BaTPP, total charge 0

|   | Doublet  |          |          | Quartet  |          |          | Sextet   |          |          |
|---|----------|----------|----------|----------|----------|----------|----------|----------|----------|
| N | -0.06842 | 2.09832  | 0.01305  | -2.08249 | -0.00013 | 0.06772  | -2.18737 | -0.00052 | -0.11433 |
| N | 2.12532  | 0.07433  | 0.08252  | -0.00300 | -2.19384 | -0.13960 | 0.00048  | -2.09323 | 0.07493  |
| N | 0.07383  | -2.11093 | 0.12622  | 2.07448  | 0.00013  | 0.04940  | 2.18726  | 0.00048  | -0.11393 |
| N | -2.13266 | -0.07456 | 0.15988  | -0.00329 | 2.19385  | -0.13959 | -0.00048 | 2.09317  | 0.07506  |
| C | -1.20048 | 2.86721  | -0.04299 | -2.85991 | 1.10325  | -0.19576 | -2.88109 | 1.10568  | 0.31049  |
| C | -0.82672 | 4.27352  | -0.07684 | -4.14023 | 0.69506  | -0.68178 | -4.07737 | 0.68505  | 1.00984  |
| C | 0.53834  | 4.32039  | -0.08328 | -4.14014 | -0.69558 | -0.68178 | -4.07706 | -0.68701 | 1.00980  |
| C | 1.00771  | 2.94318  | -0.05305 | -2.85977 | -1.10361 | -0.19575 | -2.88056 | -1.10706 | 0.31050  |
| C | 2.37098  | 2.53836  | -0.12490 | -2.44714 | -2.46840 | 0.09546  | -2.46320 | -2.47125 | 0.12049  |
| C | 2.86479  | 1.20367  | -0.14252 | -1.11081 | -2.89829 | 0.26281  | -1.10746 | -2.89590 | -0.09651 |
| C | 4.22936  | 0.82719  | -0.47956 | -0.68338 | -4.11572 | 0.93713  | -0.68599 | -4.23363 | -0.45964 |
| C | 4.27901  | -0.53759 | -0.46480 | 0.68037  | -4.11485 | 0.93726  | 0.68796  | -4.23332 | -0.45962 |
| C | 2.94092  | -1.00388 | -0.13514 | 1.10612  | -2.89779 | 0.26130  | 1.10881  | -2.89540 | -0.09643 |
| C | 2.53595  | -2.36559 | -0.10514 | 2.44090  | -2.46902 | 0.08569  | 2.46434  | -2.47012 | 0.12063  |
| C | 1.20796  | -2.86521 | -0.01858 | 2.84906  | -1.10580 | -0.21985 | 2.88101  | -1.10575 | 0.31079  |
| C | 0.84068  | -4.26169 | -0.19556 | 4.11980  | -0.69638 | -0.72108 | 4.07739  | -0.68515 | 1.01000  |
| C | -0.52369 | -4.31600 | -0.18649 | 4.11972  | 0.69692  | -0.72105 | 4.07710  | 0.68690  | 1.01000  |
| C | -0.99930 | -2.94966 | -0.02084 | 2.84892  | 1.10617  | -0.21984 | 2.88052  | 1.10699  | 0.31081  |
| C | -2.35940 | -2.54135 | -0.09991 | 2.44058  | 2.46933  | 0.08572  | 2.46322  | 2.47117  | 0.12068  |
| C | -2.85332 | -1.20653 | -0.11264 | 1.10574  | 2.89793  | 0.26132  | 1.10749  | 2.89582  | -0.09642 |
| C | -4.19069 | -0.83424 | -0.54617 | 0.67984  | 4.11494  | 0.93726  | 0.68604  | 4.23348  | -0.45977 |
| C | -4.23848 | 0.53060  | -0.55524 | -0.68391 | 4.11563  | 0.93715  | -0.68793 | 4.23317  | -0.45981 |
| C | -2.93085 | 1.00078  | -0.12645 | -1.11119 | 2.89816  | 0.26281  | -1.10879 | 2.89531  | -0.09652 |
| C | -2.53177 | 2.36757  | -0.11423 | -2.44746 | 2.46810  | 0.09546  | -2.46435 | 2.47007  | 0.12051  |
| H | -1.50847 | 5.11140  | -0.09376 | -4.94916 | 1.34968  | -0.97570 | -4.78988 | 1.34528  | 1.48335  |
| H | 1.16129  | 5.20272  | -0.10759 | -4.94898 | -1.35031 | -0.97571 | -4.78928 | -1.34759 | 1.48327  |
| H | 5.02880  | 1.50996  | -0.72936 | -1.34011 | -4.83689 | 1.40262  | -1.34110 | -5.06125 | -0.69128 |
| H | 5.12981  | -1.16481 | -0.68853 | 1.33810  | -4.83483 | 1.40311  | 1.34346  | -5.06064 | -0.69123 |

|    |          |          |          |          |          |          |          |          |          |
|----|----------|----------|----------|----------|----------|----------|----------|----------|----------|
| H  | 1.53008  | -5.08153 | -0.33917 | 4.92463  | -1.35095 | -1.02625 | 4.78996  | -1.34540 | 1.48339  |
| H  | -1.14319 | -5.19247 | -0.38066 | 4.92446  | 1.35159  | -1.02621 | 4.78938  | 1.34747  | 1.48339  |
| H  | -4.96553 | -1.52075 | -0.85616 | 1.33748  | 4.83502  | 1.40310  | 1.34117  | 5.06107  | -0.69148 |
| H  | -5.05896 | 1.15673  | -0.87528 | -1.34073 | 4.83672  | 1.40264  | -1.34342 | 5.06046  | -0.69156 |
| C  | 3.61261  | -3.39348 | -0.28322 | 3.52021  | -3.46723 | 0.27032  | 3.51287  | -3.50926 | 0.24072  |
| C  | 4.04293  | -4.16544 | 0.80644  | 3.45948  | -4.72406 | -0.36406 | 4.72390  | -3.39211 | -0.47266 |
| C  | 4.19528  | -3.61488 | -1.54068 | 4.63288  | -3.18850 | 1.09007  | 3.34894  | -4.62825 | 1.08312  |
| C  | 5.03867  | -5.13298 | 0.64548  | 4.47197  | -5.66840 | -0.18512 | 5.72328  | -4.35905 | -0.35996 |
| H  | 3.59326  | -4.00297 | 1.78201  | 2.61597  | -4.94809 | -1.00987 | 4.86984  | -2.53522 | -1.12371 |
| C  | 5.18908  | -4.58343 | -1.70399 | 5.63730  | -4.13696 | 1.27874  | 4.35131  | -5.59150 | 1.20167  |
| H  | 3.86013  | -3.02624 | -2.38981 | 4.68935  | -2.22779 | 1.59145  | 2.43517  | -4.72351 | 1.66119  |
| C  | 5.61475  | -5.34475 | -0.61077 | 5.56401  | -5.38024 | 0.63915  | 5.54224  | -5.46495 | 0.47794  |
| H  | 5.36290  | -5.71980 | 1.50039  | 4.40953  | -6.62714 | -0.69250 | 6.64324  | -4.25058 | -0.92799 |
| H  | 5.62745  | -4.74488 | -2.68488 | 6.47723  | -3.90788 | 1.92867  | 4.20605  | -6.43800 | 1.86724  |
| H  | 6.38759  | -6.09753 | -0.73727 | 6.35061  | -6.11573 | 0.78196  | 6.32127  | -6.21640 | 0.56933  |
| C  | 3.39247  | 3.62039  | -0.27179 | -3.52242 | -3.47242 | 0.27578  | -3.51121 | -3.51090 | 0.24066  |
| C  | 4.36464  | 3.82030  | 0.72249  | -3.45973 | -4.72248 | -0.37156 | -4.72234 | -3.39437 | -0.47263 |
| C  | 3.41379  | 4.44583  | -1.40853 | -4.63171 | -3.20713 | 1.10433  | -3.34665 | -4.62980 | 1.08306  |
| C  | 5.32608  | 4.82499  | 0.58999  | -4.46709 | -5.67311 | -0.19686 | -5.72123 | -4.36181 | -0.35985 |
| H  | 4.35888  | 3.18410  | 1.60285  | -2.61846 | -4.93642 | -1.02368 | -4.86876 | -2.53756 | -1.12369 |
| C  | 4.37913  | 5.44590  | -1.54597 | -5.63092 | -4.16195 | 1.28898  | -4.34853 | -5.59355 | 1.20170  |
| H  | 2.67372  | 4.29032  | -2.18788 | -4.69035 | -2.25153 | 1.61515  | -2.43278 | -4.72460 | 1.66106  |
| C  | 5.33692  | 5.64091  | -0.54563 | -5.55578 | -5.39825 | 0.63632  | -5.53957 | -5.46760 | 0.47805  |
| H  | 6.06529  | 4.96966  | 1.37288  | -4.40313 | -6.62641 | -0.71420 | -6.64128 | -4.25381 | -0.92781 |
| H  | 4.38505  | 6.06943  | -2.43564 | -6.46834 | -3.94314 | 1.94566  | -4.20279 | -6.43997 | 1.86727  |
| H  | 6.08631  | 6.42016  | -0.65126 | -6.33835 | -6.13864 | 0.77595  | -6.31822 | -6.21945 | 0.56951  |
| C  | -3.62692 | 3.37034  | -0.28339 | -3.52288 | 3.47196  | 0.27575  | -3.51280 | 3.50927  | 0.24066  |
| C  | -4.64389 | 3.47882  | 0.68028  | -3.46036 | 4.72203  | -0.37160 | -3.34863 | 4.62835  | 1.08291  |
| C  | -3.67859 | 4.20691  | -1.41141 | -4.63216 | 3.20651  | 1.10425  | -4.72394 | 3.39217  | -0.47253 |
| C  | -5.67658 | 4.40695  | 0.52854  | -4.46786 | 5.67251  | -0.19693 | -4.35090 | 5.59170  | 1.20150  |
| H  | -4.61616 | 2.83187  | 1.55229  | -2.61910 | 4.93609  | -1.02370 | -2.43475 | 4.72360  | 1.66081  |
| C  | -4.71522 | 5.12950  | -1.56872 | -5.63151 | 4.16118  | 1.28888  | -5.72322 | 4.35920  | -0.35977 |
| H  | -2.90616 | 4.11926  | -2.16953 | -4.69068 | 2.25090  | 1.61506  | -4.87006 | 2.53523  | -1.12348 |
| C  | -5.71598 | 5.23535  | -0.59740 | -5.55653 | 5.39750  | 0.63622  | -5.54195 | 5.46517  | 0.47798  |
| H  | -6.44935 | 4.48199  | 1.28845  | -4.40403 | 6.62582  | -0.71427 | -4.20545 | 6.43827  | 1.86696  |
| H  | -4.74338 | 5.76176  | -2.45177 | -6.46892 | 3.94225  | 1.94552  | -6.64327 | 4.25076  | -0.92765 |
| H  | -6.52094 | 5.95462  | -0.71852 | -6.33921 | 6.13777  | 0.77583  | -6.32091 | 6.21671  | 0.56941  |
| C  | -3.38309 | -3.61432 | -0.30208 | 3.51975  | 3.46768  | 0.27036  | 3.51124  | 3.51082  | 0.24077  |
| C  | -3.41718 | -4.37358 | -1.48327 | 4.63249  | 3.18906  | 1.09006  | 4.72244  | 3.39414  | -0.47240 |
| C  | -4.35117 | -3.86125 | 0.68486  | 3.45881  | 4.72455  | -0.36394 | 3.34662  | 4.62989  | 1.08294  |
| C  | -4.38978 | -5.35874 | -1.66967 | 5.63678  | 4.13766  | 1.27874  | 5.72133  | 4.36159  | -0.35971 |
| H  | -2.68182 | -4.17840 | -2.25817 | 4.68912  | 2.22833  | 1.59137  | 4.86890  | 2.53721  | -1.12328 |
| C  | -5.32011 | -4.85125 | 0.50320  | 4.47117  | 5.66902  | -0.18498 | 4.34850  | 5.59365  | 1.20147  |
| H  | -4.33767 | -3.27250 | 1.59765  | 2.61524  | 4.94849  | -1.00969 | 2.43270  | 4.72482  | 1.66082  |
| C  | -5.34266 | -5.60317 | -0.67549 | 5.56328  | 5.38097  | 0.63924  | 5.53961  | 5.46755  | 0.47796  |
| H  | -4.40553 | -5.93144 | -2.59276 | 6.47677  | 3.90866  | 1.92862  | 6.64143  | 4.25347  | -0.92757 |
| H  | -6.05681 | -5.03322 | 1.28069  | 4.40857  | 6.62779  | -0.69229 | 4.20271  | 6.44021  | 1.86686  |
| H  | -6.09787 | -6.37055 | -0.81957 | 6.34978  | 6.11657  | 0.78206  | 6.31826  | 6.21941  | 0.56934  |
| Ba | 0.02259  | 0.03346  | 1.67095  | -0.01506 | 0.00000  | -1.56607 | 0.00010  | -0.00002 | -1.53879 |
| H  | 0.15252  | 0.17150  | 4.42278  | 1.33846  | 0.00006  | 2.10224  | -0.01485 | 0.00548  | 2.02715  |

### CdTPP, total charge 0

|   | Singlet  |          |          | Triplet  |          |          | Quintet  |          |          |
|---|----------|----------|----------|----------|----------|----------|----------|----------|----------|
| N | 2.15008  | 0.00002  | -0.10236 | 0.00004  | -2.17326 | 0.20394  | -0.60881 | -2.08169 | -0.16311 |
| N | 0.00002  | -2.14899 | 0.00000  | 2.15875  | -0.00004 | 0.10597  | -2.08169 | 0.60881  | 0.16311  |
| N | -2.15008 | -0.00002 | 0.10236  | -0.00004 | -2.17326 | -0.20393 | 0.60881  | 2.08169  | -0.16311 |
| N | -0.00002 | 2.14900  | 0.00000  | -2.15875 | 0.00004  | 0.10598  | 2.08169  | -0.60881 | 0.16311  |
| C | 2.93282  | 1.12134  | -0.02097 | -1.12028 | 2.94203  | 0.01996  | 0.25122  | -3.12849 | 0.08938  |
| C | 4.31443  | 0.68462  | 0.10516  | -0.68248 | 4.28218  | 0.37759  | -0.53502 | -4.27602 | 0.48567  |
| C | 4.31444  | -0.68455 | 0.10516  | 0.68264  | 4.28216  | 0.37759  | -1.85362 | -3.89036 | 0.48542  |
| C | 2.93284  | -1.12130 | -0.02097 | 1.12039  | 2.94198  | 0.01996  | -1.89744 | -2.50005 | 0.08901  |
| C | 2.46884  | -2.46898 | -0.00888 | 2.46054  | 2.49022  | -0.03750 | -3.07920 | -1.68562 | -0.00037 |
| C | 1.12187  | -2.93478 | -0.00575 | 2.92001  | 1.11584  | -0.15189 | -3.12849 | -0.25122 | -0.08938 |
| C | 0.68467  | -4.32182 | -0.00807 | 4.21682  | 0.69559  | -0.56480 | -4.27602 | 0.53502  | -0.48567 |
| C | -0.68460 | -4.32183 | 0.00806  | 4.21680  | -0.69575 | -0.56480 | -3.89036 | 1.85362  | -0.48542 |
| C | -1.12182 | -2.93480 | 0.00575  | 2.91997  | -1.11595 | -0.15189 | -2.50005 | 1.89744  | -0.08901 |
| C | -2.46880 | -2.46902 | 0.00888  | 2.46044  | -2.49031 | -0.03750 | -1.68562 | 3.07920  | 0.00037  |
| C | -2.93282 | -1.12135 | 0.02097  | 1.12028  | -2.94203 | 0.01996  | -0.25122 | 3.12849  | 0.08938  |

|    |          |          |          |          |          |          |          |          |          |
|----|----------|----------|----------|----------|----------|----------|----------|----------|----------|
| C  | -4.31443 | -0.68462 | -0.10516 | 0.68248  | -4.28219 | 0.37759  | 0.53502  | 4.27602  | 0.48567  |
| C  | -4.31444 | 0.68455  | -0.10516 | -0.68264 | -4.28216 | 0.37759  | 1.85362  | 3.89036  | 0.48542  |
| C  | -2.93284 | 1.12130  | 0.02097  | -1.12039 | -2.94198 | 0.01996  | 1.89744  | 2.50005  | 0.08901  |
| C  | -2.46884 | 2.46898  | 0.00888  | -2.46054 | -2.49022 | -0.03750 | 3.07920  | 1.68562  | -0.00037 |
| C  | -1.12187 | 2.93478  | 0.00575  | -2.92001 | -1.11584 | -0.15189 | 3.12849  | 0.25122  | -0.08938 |
| C  | -0.68467 | 4.32182  | 0.00807  | -4.21682 | -0.69559 | -0.56481 | 4.27602  | -0.53502 | -0.48567 |
| C  | 0.68460  | 4.32183  | -0.00807 | -4.21679 | 0.69575  | -0.56481 | 3.89036  | -1.85362 | -0.48542 |
| C  | 1.12182  | 2.93480  | -0.00575 | -2.91997 | 1.11595  | -0.15189 | 2.50005  | -1.89744 | -0.08901 |
| C  | 2.46880  | 2.46902  | -0.00888 | -2.46044 | 2.49031  | -0.03750 | 1.68562  | -3.07920 | 0.00037  |
| H  | 5.17122  | 1.33516  | 0.20669  | -1.33397 | 5.10347  | 0.63874  | -0.13545 | -5.23922 | 0.76754  |
| H  | 5.17124  | -1.33507 | 0.20670  | 1.33416  | 5.10342  | 0.63874  | -2.70935 | -4.48641 | 0.76704  |
| H  | 1.33411  | -5.18514 | -0.02447 | 5.03047  | 1.34661  | -0.85039 | -5.23922 | 0.13545  | -0.76754 |
| H  | -1.33402 | -5.18516 | 0.02445  | 5.03042  | -1.34680 | -0.85039 | -4.48641 | 2.70935  | -0.76704 |
| H  | -5.17122 | -1.33516 | -0.20669 | 1.33397  | -5.10347 | 0.63873  | 0.13545  | 5.23922  | 0.76754  |
| H  | -5.17124 | 1.33507  | -0.20669 | -1.33416 | -5.10342 | 0.63874  | 2.70935  | 4.48641  | 0.76704  |
| H  | -1.33411 | 5.18514  | 0.02446  | -5.03046 | -1.34661 | -0.85041 | 5.23922  | -0.13545 | -0.76754 |
| H  | 1.33402  | 5.18516  | -0.02446 | -5.03041 | 1.34680  | -0.85041 | 4.48641  | -2.70935 | -0.76704 |
| C  | -3.53140 | -3.52447 | -0.02568 | 3.52634  | -3.52539 | 0.00954  | -2.39856 | 4.38137  | 0.00077  |
| C  | -4.39191 | -3.70753 | 1.06885  | 3.52474  | -4.60756 | -0.89032 | -2.04803 | 5.39883  | -0.90835 |
| C  | -3.69209 | -4.34639 | -1.15295 | 4.56783  | -3.44023 | 0.95329  | -3.44437 | 4.63369  | 0.91029  |
| C  | -5.38565 | -4.68926 | 1.03928  | 4.52852  | -5.57709 | -0.84438 | -2.72064 | 6.62161  | -0.91046 |
| H  | -4.27281 | -3.07713 | 1.94532  | 2.73833  | -4.67259 | -1.63603 | -1.25077 | 5.21598  | -1.62251 |
| C  | -4.68718 | -5.32657 | -1.18556 | 5.56270  | -4.41643 | 1.00805  | -4.11220 | 5.85908  | 0.91322  |
| H  | -3.03468 | -4.20712 | -2.00627 | 4.58167  | -2.60720 | 1.64911  | -3.71959 | 3.86311  | 1.62411  |
| C  | -5.53684 | -5.50186 | -0.08870 | 5.54866  | -5.48792 | 0.10763  | -3.75482 | 6.85840  | 0.00159  |
| H  | -6.03900 | -4.82021 | 1.89741  | 4.51587  | -6.39855 | -1.55522 | -2.44057 | 7.38800  | -1.62785 |
| H  | -4.80044 | -5.94972 | -2.06831 | 6.34950  | -4.34143 | 1.75339  | -4.90856 | 6.03561  | 1.63091  |
| H  | -6.31007 | -6.26444 | -0.11303 | 6.32784  | -6.24382 | 0.14598  | -4.27649 | 7.81115  | 0.00190  |
| C  | 3.53146  | -3.52441 | 0.02568  | 3.52648  | 3.52526  | 0.00954  | -4.38137 | -2.39856 | -0.00077 |
| C  | 3.69216  | -4.34634 | 1.15295  | 4.56796  | 3.44006  | 0.95328  | -5.39883 | -2.04803 | 0.90835  |
| C  | 4.39198  | -3.70746 | -1.06885 | 3.52491  | 4.60743  | -0.89032 | -4.63369 | -3.44437 | -0.91029 |
| C  | 4.68727  | -5.32649 | 1.18555  | 5.56287  | 4.41623  | 1.00804  | -6.62161 | -2.72064 | 0.91046  |
| H  | 3.03475  | -4.20708 | 2.00627  | 4.58177  | 2.60702  | 1.64910  | -5.21598 | -1.25077 | 1.62251  |
| C  | 5.38573  | -4.68917 | -1.03928 | 4.52873  | 5.57692  | -0.84439 | -5.85908 | -4.11220 | -0.91322 |
| H  | 4.27286  | -3.07705 | -1.94532 | 2.73850  | 4.67249  | -1.63603 | -3.86311 | -3.71959 | -1.62411 |
| C  | 5.53693  | -5.50177 | 0.08870  | 5.54887  | 5.48771  | 0.10763  | -6.85840 | -3.75482 | -0.00159 |
| H  | 4.80053  | -5.94965 | 2.06830  | 6.34967  | 4.34119  | 1.75339  | -7.38800 | -2.44057 | 1.62785  |
| H  | 6.03909  | -4.82010 | -1.89741 | 4.51611  | 6.39838  | -1.55522 | -6.03561 | -4.90856 | -1.63091 |
| H  | 6.31018  | -6.26434 | 0.11302  | 6.32808  | 6.24358  | 0.14597  | -7.81115 | -4.27649 | -0.00190 |
| C  | 3.53140  | 3.52447  | 0.02568  | -3.52634 | 3.52539  | 0.00954  | 2.39857  | -4.38137 | 0.00077  |
| C  | 3.69209  | 4.34639  | 1.15295  | -4.56783 | 3.44023  | 0.95329  | 3.44437  | -4.63369 | 0.91029  |
| C  | 4.39191  | 3.70753  | -1.06885 | -3.52474 | 4.60756  | -0.89032 | 2.04803  | -5.39883 | -0.90835 |
| C  | 4.68718  | 5.32657  | 1.18555  | -5.56270 | 4.41644  | 1.00805  | 4.11220  | -5.85908 | 0.91322  |
| H  | 3.03468  | 4.20713  | 2.00627  | -4.58167 | 2.60720  | 1.64911  | 3.71959  | -3.86311 | 1.62411  |
| C  | 5.38565  | 4.68926  | -1.03928 | -4.52852 | 5.57709  | -0.84438 | 2.72064  | -6.62161 | -0.91046 |
| H  | 4.27281  | 3.07713  | -1.94532 | -2.73833 | 4.67259  | -1.63603 | 1.25077  | -5.21598 | -1.62251 |
| C  | 5.53684  | 5.50186  | 0.08870  | -5.54866 | 5.48792  | 0.10764  | 3.75483  | -6.85840 | 0.00159  |
| H  | 4.80044  | 5.94973  | 2.06830  | -6.34950 | 4.34143  | 1.75339  | 4.90856  | -6.03561 | 1.63091  |
| H  | 6.03900  | 4.82021  | -1.89741 | -4.51587 | 6.39855  | -1.55522 | 2.44057  | -7.38800 | -1.62785 |
| H  | 6.31007  | 6.26444  | 0.11303  | -6.32784 | 6.24382  | 0.14598  | 4.27649  | -7.81115 | 0.00190  |
| C  | -3.53146 | 3.52441  | -0.02568 | -3.52648 | -3.52526 | 0.00954  | 4.38137  | 2.39857  | -0.00077 |
| C  | -4.39197 | 3.70746  | 1.06885  | -3.52492 | -4.60742 | -0.89033 | 4.63369  | 3.44437  | -0.91029 |
| C  | -3.69216 | 4.34633  | -1.15295 | -4.56796 | -3.44007 | 0.95329  | 5.39883  | 2.04803  | 0.90835  |
| C  | -5.38573 | 4.68917  | 1.03928  | -4.52874 | -5.57691 | -0.84439 | 5.85908  | 4.11220  | -0.91322 |
| H  | -4.27286 | 3.07706  | 1.94532  | -2.73851 | -4.67248 | -1.63604 | 3.86311  | 3.71959  | -1.62411 |
| C  | -4.68727 | 5.32649  | -1.18555 | -5.56286 | -4.41623 | 1.00805  | 6.62161  | 2.72064  | 0.91046  |
| H  | -3.03475 | 4.20708  | -2.00627 | -4.58176 | -2.60704 | 1.64912  | 5.21598  | 1.25077  | 1.62251  |
| C  | -5.53693 | 5.50177  | -0.08870 | -5.54887 | -5.48771 | 0.10763  | 6.85840  | 3.75482  | -0.00159 |
| H  | -6.03908 | 4.82011  | 1.89741  | -4.51612 | -6.39836 | -1.55524 | 6.03561  | 4.90856  | -1.63091 |
| H  | -4.80053 | 5.94965  | -2.06830 | -6.34966 | -4.34120 | 1.75340  | 7.38800  | 2.44057  | 1.62785  |
| H  | -6.31018 | 6.26434  | -0.11303 | -6.32808 | -6.24358 | 0.14597  | 7.81115  | 4.27649  | -0.00190 |
| Cd | 0.00000  | 0.00000  | 0.00000  | 0.00000  | 0.00000  | 0.02287  | 0.00000  | 0.00000  | 0.00000  |

### CdTPP, total charge 1

|   | Doublet  |          | Quartet  |          | Sextet   |          |          |          |          |
|---|----------|----------|----------|----------|----------|----------|----------|----------|----------|
| N | -2.15558 | -0.00001 | -0.16672 | 2.16067  | 0.00011  | -0.13572 | 1.50866  | 1.54361  | -0.24011 |
| N | -0.00008 | 2.15409  | 0.00108  | 0.00011  | -2.15888 | 0.18770  | 1.51849  | -1.49551 | -0.06241 |
| N | 2.15534  | 0.00001  | 0.16541  | -2.16067 | -0.00011 | -0.13572 | -1.50762 | -1.50649 | 0.06207  |
| N | -0.00006 | -2.15409 | 0.00108  | -0.00011 | 2.15888  | 0.18770  | -1.51954 | 1.53252  | 0.23894  |
| C | -2.93814 | -1.11569 | -0.04100 | 2.91070  | 1.11222  | 0.14936  | 1.26444  | 2.86358  | 0.03887  |

|   |          |          |          |          |          |          |          |          |          |
|---|----------|----------|----------|----------|----------|----------|----------|----------|----------|
| C | -4.30752 | -0.68546 | 0.15797  | 4.20968  | 0.68902  | 0.60583  | 2.52464  | 3.49287  | 0.34848  |
| C | -4.30753 | 0.68542  | 0.15797  | 4.20975  | -0.68860 | 0.60584  | 3.50942  | 2.51176  | 0.30876  |
| C | -2.93815 | 1.11566  | -0.04100 | 2.91081  | -1.11193 | 0.14936  | 2.87826  | 1.27989  | -0.00341 |
| C | -2.47185 | 2.47302  | -0.02118 | 2.46013  | -2.49296 | 0.03217  | 3.52240  | -0.00034 | -0.04849 |
| C | -1.11667 | 2.94399  | -0.01267 | 1.11927  | -2.93265 | -0.02215 | 2.87974  | -1.27184 | -0.11136 |
| C | -0.68531 | 4.32725  | -0.01916 | 0.67806  | -4.29230 | -0.35746 | 3.53849  | -2.55711 | -0.20230 |
| C | 0.68540  | 4.32724  | 0.01389  | -0.67764 | -4.29237 | -0.35743 | 2.56870  | -3.52227 | -0.15152 |
| C | 1.11664  | 2.94392  | 0.01189  | -1.11897 | -2.93277 | -0.02215 | 1.28637  | -2.85480 | -0.07340 |
| C | 2.47177  | 2.47294  | 0.02125  | -2.45988 | -2.49320 | 0.03217  | 0.01260  | -3.50074 | 0.00000  |
| C | 2.93820  | 1.11569  | 0.04208  | -2.91070 | -1.11222 | 0.14936  | -1.26581 | -2.86400 | 0.07330  |
| C | 4.30815  | 0.68546  | -0.15316 | -4.20968 | -0.68902 | 0.60582  | -2.54335 | -3.54069 | 0.15161  |
| C | 4.30816  | -0.68541 | -0.15316 | -4.20975 | 0.68860  | 0.60583  | -3.51999 | -2.58253 | 0.20245  |
| C | 2.93821  | -1.11566 | 0.04207  | -2.91081 | 1.11193  | 0.14936  | -2.87045 | -1.29253 | 0.11117  |
| C | 2.47179  | -2.47291 | 0.02125  | -2.46013 | 2.49296  | 0.03217  | -3.52216 | -0.02569 | 0.04822  |
| C | 1.11667  | -2.94391 | 0.01189  | -1.11927 | 2.93265  | -0.02215 | -2.88716 | 1.25906  | 0.00293  |
| C | 0.68545  | -4.32723 | 0.01389  | -0.67807 | 4.29230  | -0.35745 | -3.52732 | 2.48652  | -0.30933 |
| C | -0.68527 | -4.32725 | -0.01916 | 0.67764  | -4.29237 | -0.35744 | -2.54985 | 3.47450  | -0.34925 |
| C | -1.11664 | -2.94400 | -0.01267 | 1.11897  | 2.93277  | -0.02215 | -1.28508 | 2.85427  | -0.03961 |
| C | -2.47183 | -2.47304 | -0.02118 | 2.45988  | 2.49320  | 0.03216  | -0.01269 | 3.51977  | -0.00030 |
| H | -5.15570 | -1.33423 | 0.31770  | 5.00724  | 1.34597  | 0.91993  | 2.65865  | 4.54346  | 0.56088  |
| H | -5.15571 | 1.33418  | 0.31770  | 5.00737  | -1.34546 | 0.91995  | 4.56139  | 2.64317  | 0.51156  |
| H | -1.33180 | 5.19113  | -0.05313 | 1.33357  | -5.11309 | -0.60827 | 4.60447  | -2.70485 | -0.28419 |
| H | 1.33197  | 5.19117  | 0.04470  | -1.33307 | -5.11323 | -0.60823 | 2.70891  | -4.59231 | -0.17934 |
| H | 5.15680  | 1.33423  | -0.31032 | -5.00725 | -1.34597 | 0.91991  | -2.67587 | -4.61171 | 0.17959  |
| H | 5.15682  | -1.33418 | -0.31033 | -5.00738 | 1.34546  | 0.91993  | -4.58486 | -2.73790 | 0.28452  |
| H | 1.33202  | -5.19116 | 0.04470  | -1.33358 | 5.11309  | -0.60825 | -4.58023 | 2.61023  | -0.51207 |
| H | -1.33175 | -5.19114 | -0.05313 | 1.33306  | 5.11323  | -0.60825 | -2.69133 | 4.52404  | -0.56195 |
| C | 3.53122  | 3.51758  | -0.02481 | -3.52930 | -3.52003 | -0.00409 | 0.01795  | -4.99013 | 0.00005  |
| C | 4.47506  | 3.61469  | 1.01415  | -3.52172 | -4.60411 | 0.89494  | -0.41154 | -5.70555 | 1.13226  |
| C | 3.61145  | 4.41407  | -1.10619 | -4.58245 | -3.41961 | -0.93477 | 0.45252  | -5.70253 | -1.13212 |
| C | 5.46577  | 4.59657  | 0.97885  | -4.53490 | -5.56304 | 0.85953  | -0.39912 | -7.10132 | 1.13380  |
| H | 4.41524  | 2.93061  | 1.85529  | -2.73216 | -4.67568 | 1.63703  | -0.73933 | -5.16277 | 2.01413  |
| C | 4.61711  | 5.38030  | -1.14903 | -5.58554 | -4.38725 | -0.97778 | 0.45008  | -7.09836 | -1.13358 |
| H | 2.89770  | 4.33467  | -1.92054 | -4.59728 | -2.59069 | -1.63609 | 0.77641  | -5.15747 | -2.01402 |
| C | 5.54238  | 5.47820  | -0.10443 | -5.56631 | -5.46033 | -0.07945 | 0.02800  | -7.80109 | 0.00013  |
| H | 6.17719  | 4.67252  | 1.79552  | -4.52244 | -6.38559 | 1.56819  | -0.72036 | -7.64152 | 2.01922  |
| H | 4.67914  | 6.05470  | -1.99765 | -6.38110 | -4.30577 | -1.71218 | 0.77518  | -7.63630 | -2.01896 |
| H | 6.31923  | 6.23605  | -0.13515 | -6.35213 | -6.20892 | -0.10898 | 0.03188  | -8.88678 | 0.00017  |
| C | -3.53124 | 3.51758  | 0.02460  | 3.52966  | -3.51968 | -0.00408 | 5.00831  | 0.00859  | 0.01638  |
| C | -3.60931 | 4.41674  | 1.10398  | 3.52224  | -4.60371 | 0.89500  | 5.68845  | -0.63138 | 1.06884  |
| C | -4.47733 | 3.61215  | -1.01262 | 4.58276  | -3.41919 | -0.93481 | 5.75934  | 0.66710  | -0.97542 |
| C | -4.61496 | 5.38295  | 1.14661  | 4.53552  | -5.56253 | 0.85960  | 7.08263  | -0.61102 | 1.12838  |
| H | -2.89391 | 4.33931  | 1.91706  | 2.73272  | -4.67533 | 1.63714  | 5.11835  | -1.12930 | 1.84767  |
| C | -5.46799 | 4.59405  | -0.97764 | 5.58595  | -4.38672 | -0.97782 | 7.15380  | 0.67541  | -0.92109 |
| H | -4.41916 | 2.92612  | -1.85227 | 4.59747  | -2.59031 | -1.63618 | 5.24373  | 1.15654  | -1.79657 |
| C | -5.54241 | 5.47828  | 0.10369  | 5.56688  | -5.45976 | -0.07944 | 7.81921  | 0.03908  | 1.3215   |
| H | -4.67532 | 6.05936  | 1.99376  | 4.52318  | -6.38504 | 1.56830  | 7.59338  | -1.09816 | 1.95354  |
| H | -6.18109 | 4.66804  | -1.79302 | 6.38147  | -4.30520 | -1.71226 | 7.72019  | 1.17504  | -1.70124 |
| H | -6.31924 | 6.23614  | 0.13421  | 6.35277  | -6.20827 | -0.10896 | 8.90395  | 0.04992  | 0.17667  |
| C | -3.53120 | -3.51761 | 0.02460  | 3.52930  | 3.52003  | -0.00409 | -0.01809 | 5.00091  | 0.00003  |
| C | -3.60926 | -4.41678 | 1.10398  | 3.52174  | 4.60410  | 0.89496  | -0.76672 | 5.71774  | 0.95471  |
| C | -4.47730 | -3.61219 | -1.01261 | 4.58244  | 3.41962  | -0.93479 | 0.72528  | 5.72362  | -0.95433 |
| C | -4.61490 | -5.38300 | 1.14661  | 4.53492  | 5.56302  | 0.85955  | -0.76555 | 7.11269  | 0.95859  |
| H | -2.89385 | -4.33935 | 1.91706  | 2.73219  | 4.67565  | 1.63707  | -1.33193 | 5.17405  | 1.70628  |
| C | -5.46796 | -4.59410 | -0.97763 | 5.58552  | 4.38726  | -0.97780 | 0.71392  | 7.11852  | -0.95758 |
| H | -4.41914 | -2.92615 | -1.85226 | 4.59725  | 2.59072  | -1.63613 | 1.29437  | 5.18440  | -1.70619 |
| C | -5.54236 | -5.47833 | 0.10369  | 5.56632  | 5.46033  | -0.07945 | -0.02837 | 7.81764  | 0.00066  |
| H | -4.67524 | -6.05941 | 1.99375  | 4.52248  | 6.38555  | 1.56822  | -1.33567 | 7.64947  | 1.71081  |
| H | -6.18105 | -4.66809 | -1.79301 | 6.38108  | 4.30580  | -1.71221 | 1.28008  | 7.65979  | -1.70958 |
| H | -6.31918 | -6.23621 | 0.13421  | 6.35213  | 6.20892  | -0.10898 | -0.03234 | 8.90331  | 0.00090  |
| C | 3.53125  | -3.51754 | -0.02481 | -3.52965 | 3.51967  | -0.00408 | -5.00813 | -0.02737 | -0.01628 |
| C | 4.47509  | -3.61465 | 1.01415  | -4.58278 | 3.41916  | -0.93478 | -5.68393 | -0.67183 | -1.06879 |
| C | 3.61150  | -4.41403 | -1.10620 | -3.52222 | 4.60373  | 0.89498  | -5.76359 | 0.62544  | 0.97591  |
| C | 5.46581  | -4.59652 | 0.97885  | -5.58597 | 4.38670  | -0.97780 | -7.07825 | -0.66146 | -1.12795 |
| H | 4.41525  | -2.93058 | 1.85529  | -4.59751 | 2.59027  | -1.63613 | -5.11048 | -1.16536 | -1.84796 |
| C | 4.61717  | -5.38025 | -1.14904 | -4.53549 | 5.56256  | 0.85957  | -7.15809 | 0.62377  | 0.92194  |
| H | 2.89775  | -4.33463 | -1.92055 | -2.73268 | 4.67537  | 1.63709  | -5.25128 | 1.11834  | 1.79706  |
| C | 5.54244  | -5.47815 | -0.10443 | -5.56687 | 5.45976  | -0.07944 | -7.81920 | -0.01700 | -0.13132 |
| H | 6.17722  | -4.67247 | 1.79552  | -6.38151 | 4.30516  | -1.71221 | -7.58570 | -1.15199 | -1.95315 |
| H | 4.67921  | -6.05464 | -1.99767 | -4.52314 | 6.38508  | 1.56825  | -7.72784 | 1.11910  | 1.70238  |

|    |          |          |          |          |         |          |          |          |          |
|----|----------|----------|----------|----------|---------|----------|----------|----------|----------|
| H  | 6.31929  | -6.23599 | -0.13515 | -6.35276 | 6.20827 | -0.10897 | -8.90400 | -0.01392 | -0.17556 |
| Cd | -0.00020 | 0.00000  | 0.00077  | 0.00000  | 0.00000 | -0.10322 | -0.00001 | 0.01278  | -0.00015 |

### H-CdTPP, total charge 0

|   | Doublet  |          | Quartet  |          |          | Sextet   |          |          |          |
|---|----------|----------|----------|----------|----------|----------|----------|----------|----------|
| N | -2.08958 | -0.00004 | -0.09716 | 1.23486  | 1.60238  | -0.03146 | -0.00153 | -2.16820 | -0.17343 |
| N | -0.00427 | 2.09012  | -0.00974 | 1.68531  | -1.32544 | -0.12967 | -2.17072 | 0.00153  | 0.15297  |
| N | 2.09189  | 0.00005  | 0.07386  | -1.27079 | -1.73770 | -0.10474 | 0.00153  | 2.16819  | -0.17344 |
| N | -0.00418 | -2.09012 | -0.00976 | -1.62590 | 1.19758  | 0.03676  | 2.17072  | -0.00153 | 0.15297  |
| C | -2.90162 | -1.09987 | -0.10079 | 0.88196  | 2.87753  | 0.26900  | 1.11672  | -2.93351 | 0.07777  |
| C | -4.29485 | -0.68231 | -0.08991 | 2.08270  | 3.72272  | 0.36311  | 0.68392  | -4.25586 | 0.47320  |
| C | -4.29489 | 0.68212  | -0.08991 | 3.14070  | 2.92626  | 0.06435  | -0.68992 | -4.25488 | 0.47322  |
| C | -2.90167 | 1.09975  | -0.10079 | 2.60042  | 1.58973  | -0.19082 | -1.12086 | -2.93193 | 0.07779  |
| C | -2.45295 | 2.44613  | -0.10139 | 3.35835  | 0.46456  | -0.57981 | -2.48313 | -2.48104 | -0.01415 |
| C | -1.10485 | 2.89475  | -0.09072 | 2.87335  | -0.86561 | -0.67432 | -2.93054 | -1.11768 | -0.10779 |
| C | -0.68885 | 4.28213  | -0.21493 | 3.54394  | -1.96007 | -1.34831 | -4.24710 | -0.68400 | -0.52013 |
| C | 0.67591  | 4.28592  | -0.20003 | 2.74295  | -3.06190 | -1.20088 | -4.24613 | 0.69000  | -0.52012 |
| C | 1.09613  | 2.89898  | -0.08574 | 1.60518  | -2.63403 | -0.40538 | -2.92896 | 1.12181  | -0.10781 |
| C | 2.44140  | 2.44845  | -0.09115 | 0.47818  | -3.47083 | 0.03452  | -2.47963 | 2.48453  | -0.01418 |
| C | 2.88913  | 1.10045  | -0.06882 | -0.84887 | -2.98182 | -0.36607 | -1.11672 | 2.93351  | 0.07777  |
| C | 4.26177  | 0.68266  | -0.29868 | -1.85111 | -3.71669 | -1.11961 | -0.68392 | 4.25585  | 0.47319  |
| C | 4.26179  | -0.68247 | -0.29868 | -2.91929 | -2.87185 | -1.26274 | 0.68992  | 4.25488  | 0.47322  |
| C | 2.88918  | -1.10032 | -0.06882 | -2.54916 | -1.62144 | -0.62723 | 1.12086  | 2.93193  | 0.07778  |
| C | 2.44151  | -2.44834 | -0.09115 | -3.35856 | -0.45886 | -0.57699 | 2.48313  | 2.48104  | -0.01415 |
| C | 1.09627  | -2.89893 | -0.08575 | -2.92912 | 0.83648  | -0.21750 | 2.93054  | 1.11768  | -0.10779 |
| C | 0.67610  | -4.28589 | -0.20002 | -3.79228 | 2.01527  | -0.12639 | 4.24710  | 0.68400  | -0.52013 |
| C | -0.68866 | -4.28216 | -0.21492 | -2.98428 | 3.06820  | 0.15901  | 4.24613  | -0.69000 | -0.52012 |
| C | -1.10472 | -2.89480 | -0.09073 | -1.61564 | 2.53613  | 0.24382  | 2.92896  | -1.12181 | -0.10781 |
| C | -2.45284 | -2.44624 | -0.10140 | -0.45388 | 3.33915  | 0.43747  | 2.47963  | -2.48454 | -0.01418 |
| H | -5.15270 | -1.33839 | -0.07033 | 2.09784  | 4.76912  | 0.63065  | 1.33723  | -5.06935 | 0.75304  |
| H | -5.15277 | 1.33816  | -0.07032 | 4.18616  | 3.19794  | 0.04081  | -1.34438 | -5.06745 | 0.75309  |
| H | -1.34666 | 5.13274  | -0.31785 | 4.47430  | -1.88691 | -1.89287 | -5.05548 | -1.33765 | -0.81368 |
| H | 1.32982  | 5.14256  | -0.27021 | 2.89264  | -4.05694 | -1.59698 | -5.05360 | 1.34478  | -0.81366 |
| H | 5.09991  | 1.34051  | -0.47665 | -1.73853 | -4.72414 | -1.49601 | -1.33723 | 5.06935  | 0.75304  |
| H | 5.09997  | -1.34028 | -0.47666 | -3.84740 | -3.06195 | -1.78215 | 1.34438  | 5.06744  | 0.75308  |
| H | 1.33005  | -5.14250 | -0.27019 | -4.86327 | 2.02437  | -0.26668 | 5.05549  | 1.33765  | -0.81367 |
| H | -1.34643 | -5.13281 | -0.31783 | -3.26347 | 4.10475  | 0.28085  | 5.05360  | -1.34478 | -0.81366 |
| C | 3.50683  | 3.49336  | -0.18453 | 0.66584  | -4.72026 | 0.70904  | -3.52993 | 3.53334  | -0.01710 |
| C | 4.38606  | 3.70049  | 0.89040  | -0.44171 | -5.52266 | 1.11829  | -3.47441 | 4.61167  | -0.92207 |
| C | 3.65692  | 4.27001  | -1.34448 | 1.96570  | -5.19107 | 1.06472  | -4.61097 | 3.47733  | 0.88461  |
| C | 5.38680  | 4.67185  | 0.81132  | -0.25490 | -6.72450 | 1.78816  | -4.46438 | 5.59523  | -0.92734 |
| H | 4.27581  | 3.10004  | 1.78863  | -1.45094 | -5.17993 | 0.92034  | -2.65343 | 4.66332  | -1.63086 |
| C | 4.66477  | 5.23358  | -1.42750 | 2.13991  | -6.39467 | 1.73481  | -5.59710 | 4.46475  | 0.88442  |
| H | 2.98547  | 4.10717  | -2.18234 | 2.83513  | -4.59021 | 0.82356  | -4.66300 | 2.65762  | 1.59487  |
| C | 5.53037  | 5.43970  | -0.34856 | 1.03549  | -7.18090 | 2.09456  | -5.52961 | 5.52772  | -0.02278 |
| H | 6.05378  | 4.82695  | 1.65457  | -1.12136 | -7.30900 | 2.08524  | -4.40689 | 6.41195  | -1.64157 |
| H | 4.77410  | 5.82096  | -2.33476 | 3.14419  | -6.72183 | 1.98982  | -6.41593 | 4.40692  | 1.59620  |
| H | 6.31161  | 6.19172  | -0.41186 | 1.17673  | -8.12183 | 2.61778  | -6.29866 | 6.29481  | -0.02495 |
| C | -3.50613 | 3.50629  | -0.13377 | 4.78517  | 0.68718  | -0.95201 | -3.53490 | -3.52837 | -0.01704 |
| C | -3.68201 | 4.36446  | 0.96378  | 5.81093  | -0.00447 | -0.28424 | -4.61580 | -3.47089 | 0.88475  |
| C | -4.33224 | 3.66351  | -1.25818 | 5.13110  | 1.58353  | -1.97792 | -3.48092 | -4.60677 | -0.92202 |
| C | -4.66793 | 5.35356  | 0.93994  | 7.14848  | 0.20423  | -0.62550 | -5.60330 | -4.45695 | 0.88460  |
| H | -3.04683 | 4.24552  | 1.83660  | 5.55105  | -0.69529 | 0.51214  | -4.66665 | -2.65113 | 1.59504  |
| C | -5.31053 | 4.66015  | -1.28619 | 6.46847  | 1.78356  | -2.32687 | -4.47225 | -5.58897 | -0.92723 |
| H | -4.19716 | 3.00533  | -2.11141 | 4.34357  | 2.11090  | -2.50781 | -2.66005 | -4.65956 | -1.63085 |
| C | -5.48321 | 5.50608  | -0.18603 | 7.48126  | 1.09716  | -1.64956 | -5.53733 | -5.51999 | -0.02261 |
| H | -4.79836 | 6.00374  | 1.80032  | 7.92980  | -0.32878 | -0.09127 | -6.42200 | -4.39799 | 1.59644  |
| H | -5.93628 | 4.77537  | -2.16668 | 6.71833  | 2.47248  | -3.12873 | -4.41593 | -6.40575 | -1.64148 |
| H | -6.24689 | 6.27826  | -0.20613 | 8.52170  | 1.25588  | -1.91819 | -6.30744 | -6.28602 | -0.02475 |
| C | -3.50597 | -3.50645 | -0.13378 | -0.66873 | 4.77663  | 0.77390  | 3.52993  | -3.53334 | -0.01710 |
| C | -3.68183 | -4.36460 | 0.96378  | -1.26932 | 5.13209  | 1.99391  | 4.61097  | -3.47733 | 0.88461  |
| C | -4.33206 | -3.66371 | -1.25820 | -0.29590 | 5.79911  | -0.11507 | 3.47441  | -4.61167 | -0.92208 |
| C | -4.66770 | -5.35375 | 0.93993  | -1.48560 | 6.47339  | 2.31888  | 5.59710  | -4.46476 | 0.88442  |
| H | -3.04667 | -4.24562 | 1.83661  | -1.55732 | 4.34825  | 2.68870  | 4.66300  | -2.65763 | 1.59488  |
| C | -5.31031 | -4.66039 | -1.28621 | -0.51364 | 7.14062  | 0.20806  | 4.46438  | -5.59523 | -0.92734 |
| H | -4.19700 | -3.00554 | -2.11143 | 0.15646  | 5.53443  | -1.06659 | 2.65343  | -4.66332 | -1.63087 |
| C | -5.48297 | -5.50632 | -0.18605 | -1.10837 | 7.48232  | 1.42698  | 5.52961  | -5.52772 | -0.02278 |
| H | -4.79812 | -6.00393 | 1.80032  | -1.94498 | 6.72935  | 3.26951  | 6.41593  | -4.40692 | 1.59620  |
| H | -5.93604 | -4.77566 | -2.16671 | -0.22406 | 7.91750  | -0.49411 | 4.40689  | -6.41194 | -1.64158 |
| H | -6.24662 | -6.27853 | -0.20615 | -1.27701 | 8.52539  | 1.67893  | 6.29866  | -6.29481 | -0.02495 |

|    |          |          |          |          |          |          |         |         |          |
|----|----------|----------|----------|----------|----------|----------|---------|---------|----------|
| C  | 3.50699  | -3.49320 | -0.18453 | -4.78552 | -0.62526 | -0.98619 | 3.53490 | 3.52837 | -0.01704 |
| C  | 4.38623  | -3.70028 | 0.89041  | -5.63346 | -1.48114 | -0.26340 | 4.61580 | 3.47089 | 0.88475  |
| C  | 3.65711  | -4.26985 | -1.34447 | -5.30075 | 0.05482  | -2.10212 | 3.48092 | 4.60677 | -0.92202 |
| C  | 5.38701  | -4.67159 | 0.81133  | -6.96858 | -1.64268 | -0.63971 | 5.60330 | 4.45695 | 0.88460  |
| H  | 4.27594  | -3.09984 | 1.78864  | -5.24057 | -2.00949 | 0.60018  | 4.66665 | 2.65113 | 1.59503  |
| C  | 4.66501  | -5.23338 | -1.42748 | -6.63327 | -0.11516 | -2.48491 | 4.47224 | 5.58897 | -0.92723 |
| H  | 2.98566  | -4.10705 | -2.18233 | -4.64718 | 0.70768  | -2.67303 | 2.66005 | 4.65956 | -1.63085 |
| C  | 5.53062  | -5.43945 | -0.34854 | -7.47186 | -0.96167 | -1.75287 | 5.53733 | 5.51999 | -0.02261 |
| H  | 6.05400  | -4.82666 | 1.65459  | -7.61443 | -2.29947 | -0.06398 | 6.42200 | 4.39800 | 1.59644  |
| H  | 4.77437  | -5.82076 | -2.33474 | -7.01446 | 0.41104  | -3.35545 | 4.41592 | 6.40575 | -1.64148 |
| H  | 6.31189  | -6.19143 | -0.41183 | -8.50909 | -1.09083 | -2.04837 | 6.30744 | 6.28602 | -0.02474 |
| Cd | -0.01820 | -0.00001 | 1.06927  | 0.02538  | -0.17505 | 1.11144  | 0.00000 | 0.00000 | 0.06922  |
| H  | -0.16795 | -0.00009 | 2.78252  | 0.06573  | -0.08652 | 2.82162  | 0.00014 | 0.00015 | 2.69443  |

### CoTPP, total charge 0

|   | Doublet  |          | Quartet  |          | Sextet   |          |          |          |          |
|---|----------|----------|----------|----------|----------|----------|----------|----------|----------|
| N | -1.99464 | 0.00001  | -0.00755 | 0.01104  | 1.99538  | -0.01382 | -0.15012 | 2.04749  | -0.01836 |
| N | 0.00001  | 1.99491  | -0.00004 | 2.02122  | -0.00004 | 0.00000  | 2.06408  | 0.15147  | -0.00614 |
| N | 1.99463  | -0.00002 | 0.00763  | 0.01096  | -1.99538 | 0.01382  | 0.15150  | -2.05008 | 0.02152  |
| N | -0.00002 | -1.99492 | -0.00004 | -1.97911 | 0.00004  | 0.00000  | -2.06392 | -0.15399 | 0.05004  |
| C | -2.83346 | -1.09827 | 0.01508  | -1.05997 | 2.83387  | 0.23598  | -1.31087 | 2.79057  | 0.07404  |
| C | -4.21350 | -0.67981 | 0.06471  | -0.64360 | 4.18920  | 0.25640  | -1.00111 | 4.16470  | 0.23994  |
| C | -4.21349 | 0.67985  | 0.06486  | 0.71244  | 4.19064  | -0.02507 | 0.38450  | 4.26674  | 0.23311  |
| C | -2.83345 | 1.09830  | 0.01529  | 1.09554  | 2.83383  | -0.17651 | 0.89046  | 2.95236  | 0.06456  |
| C | -2.43580 | 2.43594  | 0.01479  | 2.44804  | 2.40719  | -0.33925 | 2.28665  | 2.61512  | 0.01339  |
| C | -1.09832 | 2.83405  | 0.00699  | 2.85899  | 1.08504  | -0.19264 | 2.80725  | 1.31558  | -0.02782 |
| C | -0.67980 | 4.21490  | -0.00051 | 4.24181  | 0.66364  | -0.14406 | 4.21731  | 0.98991  | -0.09827 |
| C | 0.67987  | 4.21489  | -0.00003 | 4.24179  | -0.66380 | 0.14407  | 4.31628  | -0.36831 | -0.08939 |
| C | 1.09836  | 2.83402  | -0.00722 | 2.85894  | -1.08515 | 0.19264  | 2.96751  | -0.89358 | -0.03788 |
| C | 2.43584  | 2.43590  | -0.01479 | 2.44794  | -2.40729 | 0.33925  | 2.64279  | -2.25391 | 0.00795  |
| C | 2.83346  | 1.09825  | -0.01506 | 1.09543  | -2.83387 | 0.17650  | 1.31388  | -2.79590 | 0.05663  |
| C | 4.21351  | 0.67979  | -0.06431 | 0.71227  | -4.19067 | 0.02507  | 1.00712  | -4.17990 | 0.10579  |
| C | 4.21350  | -0.67988 | -0.06416 | -0.64377 | -4.18917 | -0.25641 | -0.37833 | -4.28280 | 0.10997  |
| C | 2.83345  | -1.09831 | -0.01485 | -1.06008 | -2.83383 | -0.23598 | -0.88722 | -2.96023 | 0.04246  |
| C | 2.43580  | -2.43595 | -0.01442 | -2.41056 | -2.40062 | -0.39108 | -2.28271 | -2.61986 | -0.00401 |
| C | 1.09832  | -2.83406 | -0.00701 | -2.81568 | -1.07865 | -0.22252 | -2.80240 | -1.31933 | -0.02485 |
| C | 0.67981  | -4.21491 | 0.00012  | -4.19907 | -0.66315 | -0.14704 | -4.20685 | -0.99543 | -0.16859 |
| C | -0.67987 | -4.21491 | -0.00066 | -4.19904 | 0.66332  | 0.14704  | -4.30766 | 0.36268  | -0.16548 |
| C | -1.09836 | -2.83405 | 0.00678  | -2.81564 | 1.07877  | 0.22252  | -2.96651 | 0.88982  | -0.01815 |
| C | -2.43584 | -2.43592 | 0.01442  | -2.41046 | 2.40071  | 0.39108  | -2.64298 | 2.25237  | 0.01975  |
| H | -5.06057 | -1.34823 | 0.10681  | -1.27673 | 5.04013  | 0.45542  | -1.71529 | 4.96459  | 0.36552  |
| H | -5.06055 | 1.34827  | 0.10710  | 1.37631  | 5.04007  | -0.08247 | 0.97533  | 5.16248  | 0.35255  |
| H | -1.34797 | 5.06317  | -0.00468 | 5.09393  | 1.30999  | -0.28967 | 5.02234  | 1.70784  | -0.14857 |
| H | 1.34806  | 5.06314  | 0.00394  | 5.09387  | -1.31019 | 0.28967  | 5.21705  | -0.96360 | -0.11405 |
| H | 5.06059  | 1.34820  | -0.10636 | 1.37611  | -5.04013 | 0.08246  | 1.72353  | -4.98731 | 0.12792  |
| H | 5.06057  | -1.34831 | -0.10607 | -1.27693 | -5.04008 | -0.45543 | -0.96650 | -5.18681 | 0.15778  |
| H | 1.34799  | -5.06318 | 0.00423  | -5.04885 | -1.31592 | -0.28018 | -5.00464 | -1.71434 | -0.28219 |
| H | -1.34804 | -5.06317 | -0.00497 | -5.04880 | 1.31612  | 0.28018  | -5.20292 | 0.95599  | -0.27777 |
| C | 3.49526  | 3.49330  | -0.02768 | 3.46566  | -3.46597 | 0.59379  | 3.76850  | -3.23510 | 0.00375  |
| C | 4.24291  | 3.76766  | 1.12748  | 3.45872  | -4.16568 | 1.81191  | 4.06827  | -3.98053 | 1.15546  |
| C | 3.75926  | 4.22570  | -1.19500 | 4.42353  | -3.80421 | -0.37576 | 4.54358  | -3.42982 | -1.15035 |
| C | 5.23277  | 4.75418  | 1.11695  | 4.40121  | -5.16494 | 2.06273  | 5.12636  | -4.89220 | 1.15579  |
| H | 4.04157  | 3.20422  | 2.03415  | 2.71185  | -3.91732 | 2.56019  | 3.46991  | -3.83626 | 2.05022  |
| C | 4.74990  | 5.21136  | -1.20791 | 5.36055  | -4.81078 | -0.12863 | 5.59743  | -4.34750 | -1.15263 |
| H | 3.18480  | 4.01551  | -2.09269 | 4.42144  | -3.28148 | -1.32764 | 4.31168  | -2.86101 | -2.04613 |
| C | 5.48926  | 5.47865  | -0.05137 | 5.35492  | -5.49128 | 1.09267  | 5.89334  | -5.07967 | 0.00109  |
| H | 5.80111  | 4.95708  | 2.02038  | 4.38934  | -5.68953 | 3.01397  | 5.35149  | -5.45504 | 2.05734  |
| H | 4.94467  | 5.76773  | -2.12053 | 6.09093  | -5.06498 | -0.89163 | 6.18499  | -4.49013 | -2.05523 |
| H | 6.25899  | 6.24511  | -0.06052 | 6.08502  | -6.27200 | 1.28594  | 6.71414  | -5.79118 | 0.00062  |
| C | -3.49521 | 3.49335  | 0.02768  | 3.46580  | 3.46583  | -0.59378 | 3.25064  | 3.75268  | 0.02105  |
| C | -3.75880 | 4.22617  | 1.19483  | 4.42368  | 3.80404  | 0.37576  | 4.13040  | 3.94311  | 1.09950  |
| C | -4.24326 | 3.76732  | -1.12732 | 3.45889  | 4.16554  | -1.81191 | 3.28989  | 4.66011  | -1.05135 |
| C | -4.74943 | 5.21184  | 1.20775  | 5.36074  | 4.81057  | 0.12864  | 5.03034  | 5.01176  | 1.10429  |
| H | -3.18403 | 4.01628  | 2.09240  | 4.42157  | 3.28130  | 1.32765  | 4.09765  | 3.25255  | 1.93705  |
| C | -5.23310 | 4.75386  | -1.11679 | 4.40142  | 5.16476  | -2.06273 | 4.19691  | 5.72145  | -1.05197 |
| H | -4.04224 | 3.20357  | -2.03386 | 2.71201  | 3.91721  | -2.56019 | 2.60853  | 4.52217  | -1.88551 |
| C | -5.48918 | 5.47874  | 0.05137  | 5.35514  | 5.49106  | -1.09266 | 5.06890  | 5.90219  | 0.02713  |
| H | -4.94388 | 5.76853  | 2.12024  | 6.09112  | 5.06474  | 0.89164  | 5.69853  | 5.14875  | 1.94986  |

|    |          |          |          |          |          |          |          |          |          |
|----|----------|----------|----------|----------|----------|----------|----------|----------|----------|
| H  | -5.80174 | 4.95646  | -2.02009 | 4.38957  | 5.68935  | -3.01397 | 4.22226  | 6.40719  | -1.89419 |
| H  | -6.25891 | 6.24521  | 0.06052  | 6.08528  | 6.27175  | -1.28594 | 5.77094  | 6.73111  | 0.02874  |
| C  | -3.49527 | -3.49331 | 0.02704  | -3.45380 | 3.42452  | 0.68122  | -3.76438 | 3.23356  | 0.00613  |
| C  | -3.75906 | -4.22626 | 1.19406  | -4.13832 | 3.40764  | 1.90737  | -4.69972 | 3.27016  | 1.05411  |
| C  | -4.24318 | -3.76710 | -1.12810 | -3.78352 | 4.40933  | -0.26484 | -3.90509 | 4.14348  | -1.05617 |
| C  | -4.74973 | -5.21190 | 1.20672  | -5.12705 | 4.35546  | 2.18348  | -5.75042 | 4.19070  | 1.03971  |
| H  | -3.18441 | -4.01650 | 2.09174  | -3.88681 | 2.64929  | 2.64311  | -4.59130 | 2.57772  | 1.88364  |
| C  | -5.23306 | -4.75360 | -1.11783 | -4.77825 | 5.35070  | 0.00733  | -4.96201 | 5.05508  | -1.07668 |
| H  | -4.04201 | -3.20324 | -2.03454 | -3.26161 | 4.42464  | -1.21687 | -3.18391 | 4.12378  | -1.86759 |
| C  | -5.48933 | -5.47862 | 0.05020  | -5.45126 | 5.32868  | 1.23362  | -5.88710 | 5.08368  | -0.02731 |
| H  | -4.94432 | -5.76869 | 2.11911  | -5.64276 | 4.33250  | 3.13936  | -6.45961 | 4.21076  | 1.86244  |
| H  | -5.80158 | -4.95607 | -2.02124 | -5.02896 | 6.09952  | -0.73877 | -5.06321 | 5.74288  | -1.91149 |
| H  | -6.25908 | -6.24507 | 0.05915  | -6.22236 | 6.06365  | 1.44621  | -6.70616 | 5.79706  | -0.04094 |
| C  | 3.49522  | -3.49335 | -0.02704 | -3.45394 | -3.42438 | -0.68122 | -3.25220 | -3.75228 | -0.04194 |
| C  | 4.24272  | -3.76756 | 1.12826  | -3.78370 | -4.40918 | 0.26484  | -3.29008 | -4.62586 | -1.14211 |
| C  | 3.75939  | -4.22590 | -1.19423 | -4.13846 | -3.40747 | -1.90737 | -4.14599 | -3.96508 | 1.02067  |
| C  | 5.23258  | -4.75408 | 1.11799  | -4.77846 | -5.35051 | -0.00733 | -4.20726 | -5.67765 | -1.18346 |
| H  | 4.04125  | -3.20401 | 2.03483  | -3.26178 | -4.42451 | 1.21687  | -2.60048 | -4.46872 | -1.96600 |
| C  | 4.75005  | -5.21155 | -1.20689 | -5.12723 | -4.35525 | -2.18347 | -5.05627 | -5.02433 | 0.98450  |
| H  | 3.18506  | -4.01582 | -2.09203 | -3.88692 | -2.64913 | -2.64310 | -4.11672 | -3.29847 | 1.87756  |
| C  | 5.48924  | -5.47870 | -0.05020 | -5.45147 | -5.32847 | -1.23362 | -5.09189 | -5.88204 | -0.11898 |
| H  | 5.80079  | -4.95687 | 2.02152  | -5.02920 | -6.09932 | 0.73877  | -4.23126 | -6.33695 | -2.04658 |
| H  | 4.94494  | -5.76803 | -2.11940 | -5.64294 | -4.33227 | -3.13935 | -5.73539 | -5.17906 | 1.81821  |
| H  | 6.25898  | -6.24515 | -0.05915 | -6.22260 | -6.06340 | -1.44621 | -5.80195 | -6.70354 | -0.14940 |
| Co | 0.00000  | -0.00001 | 0.00000  | 0.01591  | 0.00000  | 0.00000  | 0.00017  | -0.00132 | 0.00617  |

### CoTPP, total charge 1

|   | Singlet  |          |          | Triplet  |          |          | Quintet  |          |          |
|---|----------|----------|----------|----------|----------|----------|----------|----------|----------|
| N | 0.38678  | 1.93574  | 0.00080  | 1.30496  | 1.51635  | -0.19733 | -1.33011 | -1.31148 | 0.04010  |
| N | 1.92028  | -0.39245 | 0.08482  | 1.42360  | -1.23714 | 0.02760  | -1.45255 | 1.43167  | -0.24606 |
| N | -0.38676 | -1.93571 | 0.00080  | -1.33218 | -1.36059 | 0.03818  | 1.32053  | 1.54649  | -0.24334 |
| N | -1.92026 | 0.39247  | 0.08481  | -1.44533 | 1.40470  | -0.20164 | 1.42403  | -1.18982 | 0.04798  |
| C | -0.49343 | 2.95526  | -0.35307 | 1.09509  | 2.85028  | -0.00659 | -1.13326 | -2.57064 | 0.54239  |
| C | 0.22672  | 4.18481  | -0.56238 | 2.24316  | 3.60273  | -0.44529 | -2.40503 | -3.27876 | 0.61379  |
| C | 1.53120  | 3.93001  | -0.26237 | 3.15540  | 2.69529  | -0.90887 | -3.34332 | -2.45960 | 0.07176  |
| C | 1.61461  | 2.53346  | 0.07856  | 2.59759  | 1.38964  | -0.68150 | -2.67497 | -1.22235 | -0.27898 |
| C | 2.82668  | 1.87904  | 0.41433  | 3.28601  | 0.17217  | -0.79105 | -3.32289 | -0.08136 | -0.79107 |
| C | 2.93727  | 0.49300  | 0.43439  | 2.73058  | -1.05477 | -0.35368 | -2.71839 | 1.18535  | -0.78180 |
| C | 4.16403  | -0.22971 | 0.65852  | 3.48184  | -2.26129 | -0.13619 | -3.33969 | 2.43915  | -1.12849 |
| C | 3.91845  | -1.53012 | 0.33690  | 2.61633  | -3.17442 | 0.40059  | -2.48314 | 3.42889  | -0.72720 |
| C | 2.52678  | -1.61127 | -0.02625 | 1.33125  | -2.53325 | 0.47923  | -1.33179 | 2.77306  | -0.15476 |
| C | 1.87889  | -2.82597 | -0.37424 | 0.12708  | -3.18791 | 0.82126  | -0.14573 | 3.40890  | 0.40832  |
| C | 0.49345  | -2.95523 | -0.35307 | -1.13557 | -2.62646 | 0.55725  | 1.09462  | 2.87286  | -0.13886 |
| C | -0.22668 | -4.18481 | -0.56229 | -2.39729 | -3.30822 | 0.66759  | 2.19760  | 3.62346  | -0.62123 |
| C | -1.53117 | -3.93000 | -0.26234 | -3.34431 | -2.47652 | 0.13536  | 3.12941  | 2.70844  | -1.10090 |
| C | -1.61459 | -2.53344 | 0.07855  | -2.66824 | -1.26545 | -0.24121 | 2.60353  | 1.40547  | -0.77728 |
| C | -2.82667 | -1.87903 | 0.41432  | -3.31790 | -0.10297 | -0.73995 | 3.29908  | 0.18754  | -0.82311 |
| C | -2.93725 | -0.49298 | 0.43438  | -2.71303 | 1.15678  | -0.71763 | 2.74616  | -1.00949 | -0.32974 |
| C | -4.16401 | 0.22973  | 0.65853  | -3.34579 | 2.40536  | -1.04589 | 3.49614  | -2.22289 | -0.07400 |
| C | -3.91844 | 1.53014  | 0.33692  | -2.51454 | 3.39883  | -0.60717 | 2.62928  | -3.12000 | 0.46384  |
| C | -2.52677 | 1.61129  | -0.02626 | -1.34167 | 2.75496  | -0.07241 | 1.32432  | -2.47247 | 0.50844  |
| C | -1.87888 | 2.82600  | -0.37423 | -0.15476 | 3.41362  | 0.40661  | 0.12311  | -3.13065 | 0.85649  |
| H | -0.20943 | 5.11594  | -0.89004 | 2.30700  | 4.67970  | -0.48792 | -2.54021 | -4.26807 | 1.02358  |
| H | 2.36745  | 4.61190  | -0.29445 | 4.11294  | 2.89776  | -1.36413 | -4.40027 | -2.64508 | -0.04890 |
| H | 5.08830  | 0.20638  | 1.00513  | 4.53370  | -2.38643 | -0.34462 | -4.30378 | 2.54739  | -1.60227 |
| H | 4.59908  | -2.36707 | 0.37600  | 2.82142  | -4.19496 | 0.68699  | -2.60286 | 4.49826  | -0.82484 |
| H | 0.20951  | -5.11596 | -0.88987 | -2.54364 | -4.29112 | 1.08838  | 2.23465  | 4.70005  | -0.77559 |
| H | -2.36741 | -4.61190 | -0.29441 | -4.40565 | -2.65200 | 0.04342  | 4.08509  | 2.89664  | -1.56664 |
| H | -5.08827 | -0.20637 | 1.00515  | -4.29541 | 2.51506  | -1.54747 | 4.55087  | -2.34872 | -0.26800 |
| H | -4.59906 | 2.36709  | 0.37603  | -2.64906 | 4.46241  | -0.73084 | 2.84242  | -4.13344 | 0.78128  |
| C | 2.73454  | -3.99967 | -0.68299 | 0.21990  | -4.55815 | 1.38920  | -0.19575 | 4.47832  | 1.35595  |
| C | 2.67079  | -5.17140 | 0.09251  | -0.30886 | -5.66888 | 0.70855  | 0.99571  | 5.05900  | 1.89058  |
| C | 3.64695  | -3.93599 | -1.75205 | 0.87066  | -4.75596 | 2.62012  | -1.43766 | 4.96714  | 1.86696  |
| C | 3.49856  | -6.25648 | -0.19973 | -0.19257 | -6.94927 | 1.25171  | 0.94118  | 6.08559  | 2.82165  |
| H | 1.99235  | -5.21656 | 0.93883  | -0.78573 | -5.52829 | -0.25662 | 1.96386  | 4.68239  | 1.58245  |
| C | 4.45828  | -5.02993 | -2.05366 | 0.96911  | -6.03544 | 3.16873  | -1.47862 | 5.99421  | 2.79824  |
| H | 3.70376  | -3.03329 | -2.35311 | 1.28360  | -3.90224 | 3.14928  | -2.36849 | 4.51938  | 1.53973  |
| C | 4.38804  | -6.19148 | -1.27682 | 0.43993  | -7.13489 | 2.48527  | -0.29340 | 6.57349  | 3.27625  |
| H | 3.45154  | -7.14964 | 0.41578  | -0.59153 | -7.80137 | 0.70979  | 1.86497  | 6.50717  | 3.20634  |
| H | 5.14536  | -4.97559 | -2.89255 | 1.45990  | -6.17340 | 4.12734  | -2.43883 | 6.34481  | 3.16453  |

|    |          |          |          |          |          |          |          |          |          |
|----|----------|----------|----------|----------|----------|----------|----------|----------|----------|
| H  | 5.02653  | -7.03892 | -1.50685 | 0.52397  | -8.13093 | 2.90907  | -0.33085 | 7.37946  | 4.00216  |
| C  | 4.02056  | 2.72204  | 0.68420  | 4.68313  | 0.16068  | -1.29773 | -4.72244 | -0.22608 | -1.27280 |
| C  | 5.17260  | 2.62881  | -0.11659 | 5.00174  | -0.59496 | -2.44039 | -5.77665 | 0.47766  | -0.66515 |
| C  | 3.99783  | 3.64532  | 1.74524  | 5.70273  | 0.87492  | -0.64425 | -5.00550 | -1.09531 | -2.34094 |
| C  | 6.27901  | 3.43979  | 0.14149  | 6.30807  | -0.61661 | -2.93064 | -7.08660 | 0.31585  | -1.11955 |
| H  | 5.18729  | 1.93724  | -0.95344 | 4.21925  | -1.15069 | -2.94851 | -5.56962 | 1.12957  | 0.17818  |
| C  | 5.11264  | 4.44051  | 2.01242  | 7.01176  | 0.83674  | -1.12721 | -6.31470 | -1.24422 | -2.80203 |
| H  | 3.11116  | 3.72269  | 2.36753  | 5.47084  | 1.43578  | 0.25600  | -4.19474 | -1.63954 | -2.81648 |
| C  | 6.25420  | 4.34206  | 1.20952  | 7.31623  | 0.09704  | -2.27439 | -7.35771 | -0.54063 | -2.19158 |
| H  | 7.15743  | 3.36919  | -0.49273 | 6.53843  | -1.19100 | -3.82273 | -7.89489 | 0.85382  | -0.63361 |
| H  | 5.09009  | 5.13655  | 2.84538  | 7.79363  | 1.38003  | -0.60525 | -6.51933 | -1.90802 | -3.63648 |
| H  | 7.11774  | 4.96786  | 1.41308  | 8.33386  | 0.07302  | -2.65203 | -8.37650 | -0.66153 | -2.54681 |
| C  | -2.73456 | 3.99968  | -0.68299 | -0.20459 | 4.61166  | 1.24126  | 0.20977  | -4.49623 | 1.44348  |
| C  | -3.64681 | 3.93604  | -1.75219 | -1.42868 | 5.23852  | 1.60396  | 0.77520  | -4.67059 | 2.71812  |
| C  | -2.67106 | 5.17132  | 0.09267  | 0.97699  | 5.12473  | 1.84743  | -0.23616 | -5.62546 | 0.73594  |
| C  | -4.45818 | 5.02995  | -2.05381 | -1.45352 | 6.36414  | 2.41799  | 0.87990  | -5.94579 | 3.27845  |
| H  | -3.70344 | 3.03340  | -2.35336 | -2.37177 | 4.82873  | 1.27416  | 1.12193  | -3.80249 | 3.27181  |
| C  | -3.49888 | 6.25636  | -0.19958 | 0.94643  | 6.24966  | 2.66257  | -0.12614 | -6.90030 | 1.29554  |
| H  | -1.99280 | 5.21643  | 0.93914  | 1.92084  | 4.61431  | 1.71339  | -0.65094 | -5.50355 | -0.26062 |
| C  | -4.38817 | 6.19141  | -1.27683 | -0.26571 | 6.89246  | 2.93738  | 0.42914  | -7.06305 | 2.56885  |
| H  | -5.14512 | 4.97564  | -2.89282 | -2.40639 | 6.82137  | 2.66576  | 1.31059  | -6.06533 | 2.68803  |
| H  | -3.45205 | 7.14945  | 0.41606  | 1.86864  | 6.61297  | 3.10525  | -0.46723 | -7.76547 | 0.73492  |
| H  | -5.02670 | 7.03882  | -1.50687 | -0.28934 | 7.76865  | 3.57789  | 0.51261  | -8.05440 | 3.00361  |
| C  | -4.02054 | -2.72204 | 0.68419  | -4.71890 | -0.24457 | -1.20994 | 4.69710  | 0.16075  | -1.33242 |
| C  | -3.99780 | -3.64529 | 1.74526  | -5.01436 | -1.13923 | -2.25518 | 5.71077  | 0.90457  | -0.70472 |
| C  | -5.17256 | -2.62884 | -0.11661 | -5.76709 | 0.48143  | -0.61604 | 5.01896  | -0.63165 | -2.44777 |
| C  | -5.11260 | -4.44050 | 2.01245  | -6.32452 | -1.28377 | -2.71199 | 7.02063  | 0.85666  | -1.18546 |
| H  | -3.11114 | -3.72264 | 2.36756  | -4.21061 | -1.70516 | -2.71656 | 5.47378  | 1.49965  | 0.17218  |
| C  | -6.27897 | -3.43984 | 0.14148  | -7.07938 | 0.32005  | -1.06297 | 6.32716  | -0.66690 | -0.93412 |
| H  | -5.18726 | -1.93730 | -0.95348 | -5.55321 | 1.14686  | 0.21458  | 4.23900  | -1.20618 | -2.93900 |
| C  | -6.25415 | -4.34209 | 1.20953  | -7.36024 | -0.55648 | -2.11582 | 7.33051  | 0.07531  | -2.30327 |
| H  | -5.09004 | -5.13651 | 2.84542  | -6.53702 | -1.96413 | -3.53098 | 7.79856  | 1.42505  | -0.68482 |
| H  | -7.15738 | -3.36927 | -0.49276 | -7.88208 | 0.87380  | -0.58557 | 6.56171  | -1.27255 | -3.80417 |
| H  | -7.11769 | -4.96789 | 1.41310  | -8.38085 | -0.67653 | -2.46615 | 8.34873  | 0.04273  | -2.67864 |
| Co | 0.00001  | 0.00001  | -0.10860 | -0.01112 | 0.07412  | -0.04955 | -0.00976 | 0.11357  | -0.05683 |

### CoTPP, total charge -1

|   | Singlet  |          |          | Triplet  |          |          | Quintet  |          |          |
|---|----------|----------|----------|----------|----------|----------|----------|----------|----------|
| N | -1.98494 | -0.00001 | -0.00712 | 0.00002  | 2.01193  | -0.00431 | 0.00021  | -2.06245 | -0.00001 |
| N | 0.00000  | 1.98555  | -0.00011 | 2.00490  | -0.00001 | 0.00000  | -2.05518 | -0.00020 | -0.05170 |
| N | 1.98493  | -0.00001 | 0.00735  | -0.00001 | -2.01193 | 0.00431  | -0.00021 | 2.06245  | 0.00001  |
| N | 0.00000  | -1.98558 | -0.00011 | -2.00488 | 0.00001  | 0.00000  | 2.05518  | 0.00020  | 0.05173  |
| C | -2.83173 | -1.09564 | 0.01548  | -1.10133 | 2.85294  | 0.03281  | 1.10942  | -2.88931 | -0.00040 |
| C | -4.21525 | -0.68004 | 0.07083  | -0.68983 | 4.21460  | 0.10946  | 0.69299  | -4.25337 | 0.00650  |
| C | -4.21524 | 0.68000  | 0.07112  | 0.68990  | 4.21459  | 0.10934  | -0.69215 | -4.25351 | -0.00631 |
| C | -2.83173 | 1.09562  | 0.01589  | 1.10137  | 2.85293  | 0.03264  | -1.10885 | -2.88952 | 0.00047  |
| C | -2.43165 | 2.43176  | 0.01718  | 2.45425  | 2.43465  | 0.02608  | -2.46631 | -2.44663 | 0.00019  |
| C | -1.09567 | 2.83260  | 0.01046  | 2.84450  | 1.10614  | 0.01520  | -2.87820 | -1.11419 | -0.01352 |
| C | -0.68005 | 4.21707  | 0.00104  | 4.22998  | 0.67792  | 0.00235  | -4.26268 | -0.68070 | 0.06188  |
| C | 0.68006  | 4.21707  | -0.00213 | 4.22997  | -0.67796 | -0.00236 | -4.26282 | 0.67985  | 0.06189  |
| C | 1.09567  | 2.83260  | -0.01094 | 2.84449  | -1.10617 | -0.01520 | -2.87842 | 1.11362  | -0.01352 |
| C | 2.43165  | 2.43174  | -0.01718 | 2.45422  | -2.43468 | -0.02608 | -2.46681 | 2.44615  | 0.00020  |
| C | 2.83174  | 1.09561  | -0.01540 | 1.10134  | -2.85294 | -0.03264 | -1.10942 | 2.88931  | 0.00048  |
| C | 4.21527  | 0.67999  | -0.07003 | 0.68985  | -4.21460 | -0.10933 | -0.69299 | 4.25337  | -0.00633 |
| C | 4.21527  | -0.68005 | -0.06974 | -0.68987 | -4.21459 | -0.10945 | 0.69215  | 4.25351  | 0.00648  |
| C | 2.83173  | -1.09565 | -0.01499 | -1.10136 | -2.85293 | -0.03281 | 1.10885  | 2.88952  | -0.00041 |
| C | 2.43165  | -2.43178 | -0.01646 | -2.45423 | -2.43465 | -0.02638 | 2.46632  | 2.44663  | -0.00019 |
| C | 1.09567  | -2.83263 | -0.01053 | -2.84448 | -1.10614 | -0.01537 | 2.87820  | 1.11419  | 0.01349  |
| C | 0.68006  | -4.21710 | -0.00184 | -4.22996 | -0.67792 | -0.00248 | 4.26268  | 0.68070  | -0.06201 |
| C | -0.68006 | -4.21711 | 0.00075  | -4.22996 | 0.67796  | 0.00248  | 4.26282  | -0.67985 | -0.06201 |
| C | -1.09568 | -2.83264 | 0.01005  | -2.84447 | 1.10617  | 0.01537  | 2.87842  | -1.11363 | 0.01349  |
| C | -2.43166 | -2.43178 | 0.01646  | -2.45421 | 2.43467  | 0.02638  | 2.46681  | -2.44615 | -0.00018 |
| H | -5.06416 | -1.34681 | 0.11954  | -1.35244 | 5.06524  | 0.17399  | 1.34733  | -5.11312 | 0.02115  |
| H | -5.06415 | 1.34674  | 0.12010  | 1.35253  | 5.06523  | 0.17376  | -1.34633 | -5.11338 | -0.02087 |
| H | -1.34649 | 5.06756  | -0.00356 | 5.08224  | 1.34187  | -0.00178 | -5.11838 | -1.33740 | 0.13047  |
| H | 1.34651  | 5.06756  | 0.00211  | 5.08222  | -1.34193 | 0.00176  | -5.11866 | 1.33637  | 0.13048  |
| H | 5.06420  | 1.34674  | -0.11866 | 1.35248  | -5.06524 | -0.17375 | -1.34733 | 5.11312  | -0.02089 |
| H | 5.06420  | -1.34682 | -0.11810 | -1.35249 | -5.06523 | -0.17398 | 1.34632  | 5.11338  | 0.02111  |
| H | 1.34650  | -5.06760 | 0.00268  | -5.08222 | -1.34187 | 0.00153  | 5.11838  | 1.33739  | -0.13067 |



|    |          |          |          |          |          |          |          |          |          |
|----|----------|----------|----------|----------|----------|----------|----------|----------|----------|
| H  | -1.34649 | -5.06760 | -0.00412 | -5.08220 | 1.34193  | -0.00154 | 5.11865  | -1.33637 | -0.13067 |
| C  | 3.49068  | 3.48817  | -0.03152 | 3.50668  | -3.49463 | -0.03710 | -3.52411 | 3.50174  | 0.02922  |
| C  | 4.27590  | 3.73511  | 1.10617  | 3.70640  | -4.32098 | 1.08216  | -3.69089 | 4.32685  | 1.15551  |
| C  | 3.72674  | 4.25634  | -1.18312 | 4.31974  | -3.69902 | -1.16454 | -4.38204 | 3.69891  | -1.06647 |
| C  | 5.26776  | 4.71999  | 1.09518  | 4.69271  | -5.31045 | 1.08055  | -4.68484 | 5.30776  | 1.19030  |
| H  | 4.09914  | 3.14416  | 2.00025  | 3.07740  | -4.17529 | 1.95561  | -3.03083 | 4.18577  | 2.00643  |
| C  | 4.71672  | 5.24302  | -1.19857 | 5.31026  | -4.68611 | -1.17013 | -5.38045 | 4.67735  | -1.03532 |
| H  | 3.12372  | 4.07006  | -2.06713 | 4.16670  | -3.07166 | -2.03800 | -4.25695 | 3.07242  | -1.94498 |
| C  | 5.49220  | 5.47897  | -0.05835 | 5.50137  | -5.49673 | -0.04684 | -5.53657 | 5.48721  | 0.09389  |
| H  | 5.86304  | 4.89599  | 1.98787  | 4.83309  | -5.93347 | 1.96061  | -4.79833 | 5.92882  | 2.07561  |
| H  | 4.88416  | 5.82491  | -2.10166 | 5.92852  | -4.82442 | -2.05388 | -6.03242 | 4.80959  | -1.89549 |
| H  | 6.26290  | 6.24561  | -0.06869 | 6.27002  | -6.26550 | -0.04939 | -6.31121 | 6.24947  | 0.11993  |
| C  | -3.49067 | 3.48818  | 0.03152  | 3.50671  | 3.49459  | 0.03710  | -3.52341 | -3.50244 | 0.02921  |
| C  | -3.72616 | 4.25695  | 1.18284  | 4.31979  | 3.69897  | 1.16454  | -3.69007 | -4.32753 | 1.15552  |
| C  | -4.27648 | 3.73453  | -1.10589 | 3.70644  | 4.32094  | -1.08215 | -4.38125 | -3.69982 | -1.06651 |
| C  | -4.71613 | 5.24363  | 1.19829  | 5.31032  | 4.68604  | 1.17012  | -4.68382 | -5.30864 | 1.19030  |
| H  | -3.12267 | 4.07114  | 2.06664  | 4.16674  | 3.07161  | 2.03800  | -3.03007 | -4.18628 | 2.00646  |
| C  | -5.26834 | 4.71941  | -1.09491 | 4.69276  | 5.31041  | -1.08055 | -5.37946 | -4.67846 | -1.03537 |
| H  | -4.10019 | 3.14311  | -1.99976 | 3.07744  | 4.17526  | -1.95560 | -4.25624 | -3.07333 | -1.94504 |
| C  | -5.49220 | 5.47899  | 0.05835  | 5.50143  | 5.49667  | 0.04684  | -5.53546 | -5.48830 | 0.09387  |
| H  | -4.88311 | 5.82598  | 2.10117  | 5.92858  | 4.82434  | 2.05387  | -4.79723 | -5.92969 | 2.07564  |
| H  | -5.86408 | 4.89495  | -1.98738 | 4.83315  | 5.93343  | -1.96061 | -6.03137 | -4.81086 | -1.89556 |
| H  | -6.26289 | 6.24563  | 0.06869  | 6.27009  | 6.26543  | 0.04938  | -6.30995 | -6.25072 | 0.11990  |
| C  | -3.49071 | -3.48819 | 0.03029  | -3.50667 | 3.49462  | 0.03762  | 3.52411  | -3.50175 | -0.02921 |
| C  | -3.72654 | -4.25722 | 1.18136  | -4.31964 | 3.69886  | 1.16516  | 4.38214  | -3.69883 | 1.06642  |
| C  | -4.27624 | -3.73422 | -1.10739 | -3.70652 | 4.32108  | -1.08153 | 3.69080  | -4.32694 | -1.15545 |
| C  | -4.71657 | -5.24385 | 1.19631  | -5.31017 | 4.68593  | 1.17094  | 5.38055  | -4.67727 | 1.03527  |
| H  | -3.12328 | -4.07165 | 2.06536  | -4.16649 | 3.07141  | 2.03854  | 4.25712  | -3.07227 | 1.94489  |
| C  | -5.26815 | -4.71905 | -1.09691 | -4.69285 | 5.31053  | -1.07972 | 4.68475  | -5.30785 | -1.19024 |
| H  | -4.09968 | -3.14258 | -2.00106 | -3.07761 | 4.17549  | -1.95506 | 3.03067  | -4.18593 | -2.00631 |
| C  | -5.49235 | -5.47890 | 0.05610  | -5.50141 | 5.49667  | 0.04776  | 5.53657  | -5.48721 | -0.09389 |
| H  | -4.88382 | -5.82641 | 2.09900  | -5.92835 | 4.82413  | 2.05477  | 6.03259  | -4.80943 | 1.89540  |
| H  | -5.86366 | -4.89434 | -1.98958 | -4.83334 | 5.93364  | -1.95970 | 4.79816  | -5.92898 | -2.07551 |
| H  | -6.26308 | -6.24550 | 0.06605  | -6.27007 | 6.26542  | 0.05047  | 6.31121  | -6.24948 | -0.11994 |
| C  | 3.49070  | -3.48819 | -0.03029 | -3.50671 | -3.49458 | -0.03762 | 3.52341  | 3.50244  | -0.02923 |
| C  | 4.27564  | -3.73481 | 1.10767  | -3.70658 | -4.32104 | 1.08153  | 3.68997  | 4.32761  | -1.15550 |
| C  | 3.72711  | -4.25662 | -1.18164 | -4.31967 | -3.69882 | -1.16516 | 4.38136  | 3.69974  | 1.06642  |
| C  | 5.26755  | -4.71965 | 1.09719  | -4.69291 | -5.31048 | 1.07973  | 4.68372  | 5.30873  | -1.19030 |
| H  | 4.09862  | -3.14365 | 2.00156  | -3.07766 | -4.17545 | 1.95507  | 3.02989  | 4.18643  | -2.00638 |
| C  | 4.71714  | -5.24326 | -1.19659 | -5.31022 | -4.68587 | -1.17095 | 5.37956  | 4.67838  | 1.03526  |
| H  | 3.12432  | -4.07058 | -2.06586 | -4.16652 | -3.07137 | -2.03854 | 4.25643  | 3.07319  | 1.94492  |
| C  | 5.49233  | -5.47890 | -0.05611 | -5.50147 | -5.49660 | -0.04777 | 5.53546  | 5.48831  | -0.09393 |
| H  | 5.86260  | -4.89541 | 1.99007  | -4.83341 | -5.93358 | 1.95970  | 4.79704  | 5.92984  | -2.07560 |
| H  | 4.88485  | -5.82535 | -2.09949 | -5.92840 | -4.82407 | -2.05477 | 6.03155  | 4.81072  | 1.89541  |
| H  | 6.26306  | -6.24551 | -0.06606 | -6.27014 | -6.26535 | -0.05047 | 6.30995  | 6.25073  | -0.11998 |
| Co | 0.00000  | -0.00002 | 0.00000  | 0.00001  | 0.00000  | 0.00000  | 0.00000  | 0.00000  | 0.00000  |

### H-CoTPP, total charge 0

|   | Singlet  |          |          | Triplet  |          |          | Quintet  |          |          |
|---|----------|----------|----------|----------|----------|----------|----------|----------|----------|
| N | -0.00469 | -1.98603 | -0.00828 | -2.05314 | -0.00305 | -0.09596 | 2.03713  | -0.00001 | -0.02659 |
| N | -1.98132 | 0.00471  | -0.06311 | -0.00376 | 2.03649  | -0.03234 | 0.00158  | -2.03618 | -0.00400 |
| N | 0.00469  | 1.98603  | -0.00828 | 2.05249  | 0.00305  | 0.02267  | -2.03448 | 0.00001  | 0.01801  |
| N | 1.98132  | -0.00471 | -0.06311 | 0.00238  | -2.03649 | -0.03247 | 0.00160  | 2.03618  | -0.00400 |
| C | 1.09037  | -2.82705 | 0.06668  | -2.87213 | -1.10777 | -0.04308 | 2.86390  | 1.10394  | -0.01109 |
| C | 0.66960  | -4.19797 | 0.21922  | -4.25676 | -0.68755 | 0.02540  | 4.24493  | 0.68195  | 0.02468  |
| C | -0.68982 | -4.19478 | 0.21778  | -4.25881 | 0.67484  | 0.02533  | 4.24492  | -0.68199 | 0.02468  |
| C | -1.10382 | -2.82188 | 0.06452  | -2.87544 | 1.09921  | -0.04319 | 2.86389  | -1.10397 | -0.01110 |
| C | -2.43797 | -2.42676 | -0.02156 | -2.45143 | 2.43848  | -0.02213 | 2.44637  | -2.44447 | -0.01138 |
| C | -2.82400 | -1.09046 | -0.11775 | -1.11121 | 2.86023  | -0.01347 | 1.10588  | -2.86228 | -0.01621 |
| C | -4.19507 | -0.66955 | -0.26900 | -0.68907 | 4.24223  | -0.00659 | 0.68438  | -4.24337 | -0.05276 |
| C | -4.19188 | 0.68977  | -0.26754 | 0.67473  | 4.24362  | 0.00127  | -0.67958 | -4.24401 | -0.04941 |
| C | -2.81884 | 1.10392  | -0.11558 | 1.10113  | 2.86254  | -0.02047 | -1.10220 | -2.86291 | -0.02705 |
| C | -2.42647 | 2.43827  | -0.01777 | 2.44477  | 2.44639  | -0.02510 | -2.44243 | -2.44464 | -0.03486 |
| C | -1.09037 | 2.82705  | 0.06668  | 2.87344  | 1.10903  | -0.02293 | -2.85941 | -1.10391 | -0.03222 |
| C | -0.66960 | 4.19797  | 0.21922  | 4.25549  | 0.68775  | -0.11199 | -4.23773 | -0.68195 | -0.12597 |
| C | 0.68982  | 4.19478  | 0.21778  | 4.25754  | -0.67501 | -0.11207 | -4.23772 | 0.68199  | -0.12597 |
| C | 1.10382  | 2.82188  | 0.06452  | 2.87677  | -1.10046 | -0.02304 | -2.85940 | 1.10394  | -0.03222 |
| C | 2.43797  | 2.42676  | -0.02156 | 2.45211  | -2.43909 | -0.02532 | -2.44240 | 2.44467  | -0.03487 |
| C | 2.82400  | 1.09046  | -0.11775 | 1.10972  | -2.85925 | -0.02067 | -1.10218 | 2.86292  | -0.02705 |
| C | 4.19507  | 0.66955  | -0.26900 | 0.68743  | -4.24159 | 0.00110  | -0.67955 | 4.24401  | -0.04941 |

|    |          |          |          |          |          |          |          |          |          |
|----|----------|----------|----------|----------|----------|----------|----------|----------|----------|
| C  | 4.19188  | -0.68977 | -0.26755 | -0.67638 | -4.24425 | -0.00660 | 0.68442  | 4.24336  | -0.05275 |
| C  | 2.81884  | -1.10392 | -0.11558 | -1.10261 | -2.86350 | -0.01344 | 1.10591  | 2.86227  | -0.01620 |
| C  | 2.42647  | -2.43827 | -0.01777 | -2.44409 | -2.44575 | -0.02196 | 2.44639  | 2.44445  | -0.01137 |
| H  | 1.33610  | -5.04157 | 0.31934  | -5.10715 | -1.35116 | 0.08211  | 5.09766  | 1.34400  | 0.05873  |
| H  | -1.36051 | -5.03522 | 0.31650  | -5.11117 | 1.33591  | 0.08199  | 5.09765  | -1.34405 | 0.05873  |
| H  | -5.03822 | -1.33634 | -0.37088 | -1.35056 | 5.09601  | -0.00996 | 1.34668  | -5.09612 | -0.08056 |
| H  | -5.03188 | 1.36074  | -0.36801 | 1.33420  | 5.09875  | 0.01959  | -1.34099 | -5.09772 | -0.06375 |
| H  | -1.33610 | 5.04157  | 0.31935  | 5.10505  | 1.35069  | -0.18577 | -5.08754 | -1.34437 | -0.20139 |
| H  | 1.36051  | 5.03522  | 0.31650  | 5.10908  | -1.33539 | -0.18595 | -5.08753 | 1.34441  | -0.20140 |
| H  | 5.03822  | 1.33634  | -0.37087 | 1.34944  | -5.09476 | 0.01935  | -1.34095 | 5.09773  | -0.06375 |
| H  | 5.03188  | -1.36074 | -0.36802 | -1.33533 | -5.09998 | -0.00989 | 1.34673  | 5.09611  | -0.08055 |
| C  | -3.48376 | 3.49603  | -0.00249 | 3.50015  | 3.50820  | -0.04203 | -3.50406 | -3.49994 | -0.06311 |
| C  | -3.64983 | 4.35650  | -1.09876 | 4.30296  | 3.73337  | 1.08695  | -4.29197 | -3.74655 | 1.07173  |
| C  | -4.32782 | 3.64518  | 1.10886  | 3.70841  | 4.29240  | -1.18729 | -3.73270 | -4.25542 | -1.22350 |
| C  | -4.63913 | 5.34327  | -1.08561 | 5.29023  | 4.72220  | 1.07285  | -5.28540 | -4.72908 | 1.04825  |
| H  | -3.00065 | 4.24402  | -1.96237 | 4.14559  | 3.13015  | 1.97649  | -4.11820 | -3.16534 | 1.97283  |
| C  | -5.31498 | 4.63402  | 1.12521  | 4.69749  | 5.27927  | -1.20417 | -4.72760 | -5.23636 | -1.24929 |
| H  | -4.20218 | 2.98300  | 1.96067  | 3.09260  | 4.12018  | -2.06538 | -3.12863 | -4.06557 | -2.10614 |
| C  | -5.47402 | 5.48544  | 0.02725  | 5.49079  | 5.49777  | -0.07337 | -5.50631 | -5.47657 | -0.11279 |
| H  | -4.75819 | 5.99845  | -1.94403 | 5.90033  | 4.88703  | 1.95656  | -5.88430 | -4.91094 | 1.93625  |
| H  | -5.95734 | 4.73983  | 1.99498  | 4.84918  | 5.87464  | -2.10019 | -4.89523 | -5.80991 | -2.15663 |
| H  | -6.24224 | 6.25339  | 0.03874  | 6.25902  | 6.26569  | -0.08549 | -6.27918 | -6.23966 | -0.13196 |
| C  | -3.50013 | -3.47968 | -0.00902 | -3.51085 | 3.49627  | 0.01120  | 3.50489  | -3.50324 | -0.00595 |
| C  | -4.34629 | -3.62656 | 1.10104  | -3.73476 | 4.24816  | 1.17487  | 3.73814  | -4.27222 | 1.14465  |
| C  | -3.66859 | -4.33794 | -1.10665 | -4.30073 | 3.74971  | -1.12074 | 4.28117  | -3.74373 | -1.15006 |
| C  | -5.33788 | -4.61099 | 1.11476  | -4.72674 | 5.23181  | 1.20676  | 4.72681  | -5.25973 | 1.15188  |
| H  | -4.21879 | -2.96611 | 1.95392  | -3.12864 | 4.05379  | 2.05508  | 3.14206  | -4.08799 | 2.03387  |
| C  | -4.66231 | -5.32028 | -1.09613 | -5.29106 | 4.73520  | -1.09141 | 5.26839  | -4.73277 | -1.14511 |
| H  | -3.01775 | -4.22723 | -1.96924 | -4.13098 | 3.17143  | -2.02448 | 4.10297  | -3.15307 | -2.00444 |
| C  | -5.49930 | -5.46021 | 0.01544  | -5.50737 | 5.47875  | 0.07304  | 5.49445  | -5.49323 | 0.00650  |
| H  | -5.98185 | -4.71510 | 1.98354  | -4.89057 | 5.80240  | 2.11666  | 4.89813  | -5.84383 | 2.05176  |
| H  | -4.78317 | -5.97379 | -1.95558 | -5.89126 | 4.92234  | -1.97746 | 5.85821  | -4.90977 | -2.04017 |
| H  | -6.27097 | -6.22472 | 0.02489  | -6.27794 | 6.24403  | 0.09687  | 6.26243  | -6.26147 | 0.01132  |
| C  | 3.48376  | -3.49602 | -0.00249 | -3.50032 | -3.50673 | 0.01155  | 3.50492  | 3.50321  | -0.00594 |
| C  | 4.32782  | -3.64518 | 1.10886  | -3.72186 | -4.25919 | 1.17531  | 3.73817  | 4.27218  | 1.14467  |
| C  | 3.64983  | -4.35650 | -1.09876 | -4.28949 | -3.76270 | -1.12032 | 4.28121  | 3.74369  | -1.15004 |
| C  | 5.31497  | -4.63402 | 1.12521  | -4.71082 | -5.24586 | 1.20735  | 4.72685  | 5.25969  | 1.15190  |
| H  | 4.20218  | -2.98300 | 1.96067  | -3.11628 | -4.06288 | 2.05546  | 3.14209  | 4.08796  | 2.03388  |
| C  | 4.63913  | -5.34326 | -1.08561 | -5.27679 | -4.75121 | -1.09084 | 5.26843  | 4.73273  | -1.14509 |
| H  | 3.00065  | -4.24401 | -1.96237 | -4.12154 | -3.18401 | -2.02414 | 4.10301  | 3.15304  | -2.04412 |
| C  | 5.47402  | -5.48544 | 0.02725  | -5.49075 | -5.49530 | 0.07370  | 5.49450  | 5.49318  | 0.00653  |
| H  | 5.95733  | -4.73983 | 1.99498  | -4.87285 | -5.81686 | 2.11732  | 4.89817  | 5.84378  | 2.05178  |
| H  | 4.75819  | -5.99845 | -1.94403 | -5.87646 | -4.94028 | -1.97683 | 5.85826  | 4.90972  | -2.04014 |
| H  | 6.24224  | -6.25339 | 0.03874  | -6.25898 | -6.26294 | 0.09765  | 6.26249  | 6.26141  | 0.01135  |
| C  | 3.50013  | 3.47968  | -0.00902 | 3.51066  | -3.49773 | -0.04235 | -3.50403 | 3.49997  | -0.06313 |
| C  | 3.66859  | 4.33794  | -1.10664 | 4.31424  | -3.72051 | 1.08655  | -4.29194 | 3.74659  | 1.07171  |
| C  | 4.34630  | 3.62656  | 1.10104  | 3.72121  | -4.28126 | -1.18766 | -3.73266 | 4.25546  | -1.22352 |
| C  | 4.66231  | 5.32028  | -1.09613 | 5.30451  | -4.70635 | 1.07234  | -5.28537 | 4.72912  | 1.04822  |
| H  | 3.01775  | 4.22723  | -1.96924 | 4.15512  | -3.11780 | 1.97613  | -4.11819 | 3.16538  | 1.97281  |
| C  | 5.33789  | 4.61098  | 1.11476  | 4.71328  | -5.26512 | -1.20466 | -4.72754 | 5.23640  | -1.24931 |
| H  | 4.21879  | 2.96611  | 1.95392  | 3.10482  | -4.11086 | -2.06570 | -3.12858 | 4.06561  | -2.10615 |
| C  | 5.49930  | 5.46021  | 0.01544  | 5.50732  | -5.48126 | -0.07392 | -5.50626 | 5.47662  | -0.11282 |
| H  | 4.78317  | 5.97379  | -1.95558 | 5.91517  | -4.86935 | 1.95600  | -5.88427 | 4.91099  | 1.93622  |
| H  | 5.98185  | 4.71509  | 1.98354  | 4.86670  | -5.85999 | -2.10071 | -4.89516 | 5.80996  | -2.15665 |
| H  | 6.27097  | 6.22472  | 0.02489  | 6.27788  | -6.24683 | -0.08614 | -6.27913 | 6.23972  | -0.13200 |
| Co | 0.00000  | 0.00000  | 0.04673  | 0.01713  | 0.00006  | 0.13712  | 0.00369  | -0.00001 | 0.36749  |
| H  | 0.00000  | 0.00000  | 1.45779  | -0.41205 | -0.00146 | 1.54656  | 0.02816  | -0.00002 | 2.07061  |

### H-CoTPP, total charge -1

|   | Doublet  |          |          | Quartet  |          |          | Sextet   |          |          |
|---|----------|----------|----------|----------|----------|----------|----------|----------|----------|
| N | -0.76829 | 1.84043  | -0.05203 | -0.53794 | 1.99443  | -0.01462 | -2.04194 | -0.00001 | -0.06509 |
| N | 1.84167  | 0.77662  | 0.00451  | 2.00180  | 0.52912  | 0.01737  | -0.00142 | 2.05198  | -0.01201 |
| N | 0.76753  | -1.82381 | -0.02464 | 0.54029  | -1.99333 | 0.01408  | 2.03876  | 0.00001  | 0.01631  |
| N | -1.83535 | -0.76268 | 0.00866  | -1.99736 | -0.52809 | 0.04265  | -0.00141 | -2.05198 | -0.01201 |
| C | -2.10847 | 2.19213  | 0.06878  | -1.81100 | 2.49766  | -0.01800 | -2.87062 | -1.11166 | -0.03329 |
| C | -2.25885 | 3.62703  | -0.05464 | -1.76310 | 3.94976  | 0.03489  | -4.25553 | -0.67968 | 0.03083  |
| C | -1.02227 | 4.14142  | -0.27014 | -0.44451 | 4.29896  | 0.05445  | -4.25553 | 0.67965  | 0.03082  |
| C | -0.08435 | 3.03578  | -0.21681 | 0.31839  | 3.06189  | 0.01216  | -2.87063 | 1.11164  | -0.03329 |
| C | 1.29187  | 3.19039  | -0.25861 | 1.72943  | 2.98944  | 0.01188  | -2.46348 | 2.44232  | -0.02772 |
| C | 2.19221  | 2.11285  | -0.06994 | 2.49656  | 1.80396  | -0.01921 | -1.10785 | 2.88190  | -0.03502 |

|    |          |          |          |          |          |          |          |          |          |
|----|----------|----------|----------|----------|----------|----------|----------|----------|----------|
| C  | 3.59366  | 2.27698  | 0.13140  | 3.94667  | 1.76216  | -0.12885 | -0.69398 | 4.24477  | -0.08372 |
| C  | 4.11636  | 1.01732  | 0.34078  | 4.30270  | 0.44555  | -0.14749 | 0.69057  | 4.24539  | -0.07369 |
| C  | 3.03278  | 0.10028  | 0.23581  | 3.07044  | -0.32226 | -0.06418 | 1.10483  | 2.88218  | -0.03859 |
| C  | 3.16963  | -1.30597 | 0.27344  | 2.99962  | -1.73041 | -0.05126 | 2.45987  | 2.44185  | -0.03340 |
| C  | 2.10748  | -2.17369 | 0.08551  | 1.81234  | -2.49380 | -0.01797 | 2.86680  | 1.11158  | -0.01636 |
| C  | 2.26563  | -3.60050 | -0.10727 | 1.76816  | -3.94719 | -0.05176 | 4.25153  | 0.67969  | -0.08697 |
| C  | 1.02962  | -4.11359 | -0.32931 | 0.45055  | -4.29941 | -0.03508 | 4.25154  | -0.67966 | -0.08698 |
| C  | 0.08726  | -3.01543 | -0.23083 | -0.31347 | -3.06146 | -0.00753 | 2.86681  | -1.11156 | -0.01637 |
| C  | -1.28829 | -3.17095 | -0.29133 | -1.72347 | -2.98768 | -0.01666 | 2.45989  | -2.44183 | -0.03341 |
| C  | -2.19081 | -2.09521 | -0.10364 | -2.48855 | -1.80092 | -0.03941 | 1.10485  | -2.88217 | -0.03859 |
| C  | -3.60065 | -2.25257 | 0.03767  | -3.93311 | -1.76021 | -0.21457 | 0.69059  | -4.24538 | -0.07369 |
| C  | -4.12413 | -0.99230 | 0.24194  | -4.28877 | -0.44403 | -0.23067 | -0.69395 | -4.24477 | -0.08371 |
| C  | -3.02841 | -0.08408 | 0.21293  | -3.06204 | 0.32191  | -0.06469 | -1.10784 | -2.88190 | -0.03502 |
| C  | -3.16547 | 1.32122  | 0.25659  | -2.99675 | 1.73290  | -0.05110 | -2.46347 | -2.44233 | -0.02772 |
| H  | -3.19877 | 4.15701  | 0.00111  | -2.61846 | 4.60946  | 0.07055  | -5.11042 | -1.33822 | 0.08953  |
| H  | -0.75243 | 5.17465  | -0.43233 | -0.02950 | 5.29547  | 0.10926  | -5.11043 | 1.33819  | 0.08953  |
| H  | 4.11619  | 3.22247  | 0.13992  | 4.59960  | 2.62129  | -0.19261 | -1.35072 | 5.10174  | -0.12537 |
| H  | 5.14412  | 0.75199  | 0.54055  | 5.29978  | 0.03385  | -0.21584 | 1.34690  | 5.10349  | -0.09018 |
| H  | 3.21198  | -4.12212 | -0.10537 | 2.62557  | -4.60437 | -0.09138 | 5.10553  | 1.33895  | -0.15122 |
| H  | 0.76438  | -5.13908 | -0.54105 | 0.03713  | -5.29800 | -0.04145 | 5.10554  | -1.33892 | -0.15122 |
| H  | -4.13006 | -3.19343 | 0.00030  | -4.57861 | -2.51888 | -0.33583 | 1.34693  | -5.10348 | -0.09018 |
| H  | -5.16043 | -0.71602 | 0.37282  | -5.27765 | -0.03025 | -0.37005 | -1.35070 | -5.10175 | -0.12537 |
| C  | 4.53354  | -1.88291 | 0.45989  | 4.29307  | -2.48387 | -0.08791 | 3.51882  | 3.49642  | -0.06310 |
| C  | 4.84494  | -2.62654 | 1.61084  | 4.74651  | -3.18147 | 1.04390  | 4.34210  | 3.72397  | 1.05223  |
| C  | 5.53569  | -1.71295 | -0.51119 | 5.08106  | -2.51573 | -1.25008 | 3.71954  | 4.28580  | -1.20837 |
| C  | 6.11303  | -3.18969 | 1.78406  | 5.95091  | -3.88996 | 1.01572  | 5.34201  | 4.70093  | 1.02226  |
| H  | 4.07750  | -2.75985 | 2.36783  | 4.14317  | -3.15950 | 1.94678  | 4.18945  | 3.12292  | 1.94407  |
| C  | 6.80409  | -2.27311 | -0.34189 | 6.28725  | -3.22137 | -1.28162 | 4.71594  | 5.26456  | -1.24217 |
| H  | 5.30468  | -1.13947 | -1.40402 | 4.73568  | -1.98170 | -2.13070 | 3.08515  | 4.11928  | -2.07412 |
| C  | 7.09896  | -3.01521 | 0.80805  | 6.72731  | -3.91246 | -0.14781 | 5.53332  | 5.47610  | -0.12578 |
| H  | 6.33058  | -3.76151 | 2.68292  | 6.28417  | -4.42112 | 1.90385  | 5.96807  | 4.85852  | 1.89719  |
| H  | 7.56101  | -2.13535 | -1.11025 | 6.88048  | -3.23443 | -2.19268 | 4.85746  | 5.85898  | -2.14156 |
| H  | 8.08564  | -3.45189 | 0.94066  | 7.66465  | -4.46249 | -0.17074 | 6.30957  | 6.23675  | -0.15096 |
| C  | 1.87538  | 4.55133  | -0.44057 | 2.48184  | 4.28288  | 0.02609  | -3.51902 | 3.49967  | -0.00562 |
| C  | 1.71837  | 5.55526  | 0.53079  | 3.25423  | 4.64946  | 1.14130  | -3.68768 | 4.32401  | 1.12047  |
| C  | 2.62347  | 4.85718  | -1.59147 | 2.44014  | 5.15971  | -1.07099 | -4.36844 | 3.69980  | -1.10677 |
| C  | 2.27233  | 6.82640  | 0.35111  | 3.96256  | 5.85393  | 1.16031  | -4.67815 | 5.30861  | 1.14974  |
| H  | 1.15734  | 5.32589  | 1.43206  | 3.28911  | 3.97846  | 1.99457  | -3.03232 | 4.17981  | 1.97447  |
| C  | 3.18088  | 6.12475  | -1.77431 | 3.14647  | 6.36556  | -1.05545 | -5.36231 | 4.68303  | -1.08128 |
| H  | 2.76158  | 4.08442  | -2.34223 | 1.84848  | 4.88282  | -1.93876 | -4.24037 | 3.07309  | -1.98471 |
| C  | 3.00587  | 7.11794  | -0.80323 | 3.91159  | 6.71816  | 0.06135  | -5.52186 | 5.49225  | 0.04790  |
| H  | 2.13660  | 7.58616  | 1.11713  | 4.55074  | 6.11885  | 2.03542  | -4.79460 | 5.92973  | 2.03454  |
| H  | 3.74945  | 6.33869  | -2.67616 | 3.10221  | 7.02719  | -1.91709 | -6.00819 | 4.81906  | -1.94538 |
| H  | 3.43862  | 8.10523  | -0.94390 | 4.46180  | 7.65558  | 0.07507  | -6.29336 | 6.25781  | 0.06963  |
| C  | -4.54005 | 1.87334  | 0.45351  | -4.29446 | 2.47520  | -0.08701 | -3.51899 | -3.49969 | -0.00561 |
| C  | -5.15863 | 1.80832  | 1.71277  | -5.20044 | 2.38627  | 0.98389  | -3.68766 | -4.32403 | 1.12048  |
| C  | -5.25318 | 2.45073  | -0.60950 | -4.64434 | 3.27494  | -1.18837 | -4.36842 | -3.69983 | -1.10676 |
| C  | -6.44609 | 2.31566  | 1.90822  | -6.41604 | 3.07474  | 0.95620  | -4.67812 | -5.30863 | 1.14975  |
| H  | -4.61603 | 1.35514  | 2.53750  | -4.93638 | 1.77286  | 1.84028  | -3.03229 | -4.17982 | 1.97448  |
| C  | -6.54010 | 2.96327  | -0.41791 | -5.85901 | 3.96529  | -1.21947 | -5.36228 | -4.68307 | -1.08127 |
| H  | -4.78639 | 2.49304  | -1.58944 | -3.95275 | 3.34614  | -2.02280 | -4.24036 | -3.07312 | -1.98470 |
| C  | -7.14209 | 2.89770  | 0.84267  | -6.75107 | 3.86825  | -0.14625 | -5.52182 | -5.49228 | 0.04791  |
| H  | -6.90437 | 2.25950  | 2.89260  | -7.09941 | 2.99454  | 1.79795  | -4.79455 | -5.92975 | 2.03456  |
| H  | -7.07344 | 3.40836  | -1.25442 | -6.11016 | 4.57510  | -2.08387 | -6.00817 | -4.81909 | -1.94536 |
| H  | -8.14308 | 3.29409  | 0.99331  | -7.69635 | 4.40455  | -0.16886 | -6.29333 | -6.25785 | 0.06965  |
| C  | -1.86479 | -4.52914 | -0.50993 | -2.48101 | -4.27817 | -0.03957 | 3.51884  | -3.49640 | -0.06311 |
| C  | -1.70638 | -5.55549 | 0.43759  | -2.43845 | -5.12851 | -1.15721 | 4.34213  | -3.72395 | 1.05222  |
| C  | -2.60234 | -4.81280 | -1.67342 | -3.26531 | -4.66409 | 1.06055  | 3.71955  | -4.28578 | -1.20838 |
| C  | -2.24982 | -6.82584 | 0.22361  | -3.15412 | -6.32880 | -1.17521 | 5.34204  | -4.70090 | 1.02225  |
| H  | -1.15186 | -5.34440 | 1.34734  | -1.83971 | -4.83512 | -2.01460 | 4.18948  | -3.12290 | 1.94406  |
| C  | -3.14940 | -6.07945 | -1.89026 | -3.98267 | -5.86332 | 1.04612  | 4.71596  | -5.26453 | -1.24218 |
| H  | -2.74038 | -4.02366 | -2.40689 | -3.30285 | -4.01197 | 1.92823  | 3.08516  | -4.11927 | -2.07413 |
| C  | -2.97383 | -7.09458 | -0.94218 | -3.92984 | -6.70186 | -0.07243 | 5.53335  | -5.47607 | -0.12579 |
| H  | -2.11307 | -7.60306 | 0.97173  | -3.10934 | -6.96972 | -2.05233 | 5.96811  | -4.85848 | 1.89716  |
| H  | -3.70988 | -6.27568 | -2.80114 | -4.58024 | -6.14373 | 1.90997  | 4.85748  | -5.85896 | -2.14157 |
| H  | -3.39851 | -8.08119 | -1.10956 | -4.48736 | -7.63497 | -0.08496 | 6.30961  | -6.23672 | -0.15098 |
| Co | 0.00119  | 0.00831  | 0.07115  | 0.01778  | 0.02199  | 0.55394  | -0.00651 | 0.00000  | 0.36339  |
| H  | -0.00010 | 0.01999  | 1.48477  | -0.04906 | -0.04812 | 2.21403  | -0.04632 | 0.00001  | 2.06743  |

**H-CoTPP, total charge 1**

|   | Doublet  |          |          | Quartet  |          |          | Sextet   |          |          |
|---|----------|----------|----------|----------|----------|----------|----------|----------|----------|
| N | -1.93365 | 0.38310  | -0.00156 | -2.02962 | 0.35462  | 0.01136  | -0.00010 | 2.04644  | -0.01236 |
| N | 0.37302  | 1.96205  | -0.02735 | 0.35430  | 2.01562  | -0.02971 | 2.04615  | 0.00009  | 0.01163  |
| N | 1.94045  | -0.36201 | -0.04957 | 2.01922  | -0.35278 | -0.06230 | 0.00009  | -2.04644 | -0.01235 |
| N | -0.36275 | -1.91429 | -0.02608 | -0.35065 | -2.01635 | -0.03090 | -2.04614 | -0.00010 | -0.01162 |
| C | -2.95466 | -0.50145 | -0.28533 | -3.02227 | -0.58902 | -0.10646 | -1.10096 | 2.86796  | 0.08551  |
| C | -4.22157 | 0.17845  | -0.30398 | -4.28696 | 0.05531  | -0.35626 | -0.68446 | 4.22755  | 0.30106  |
| C | -3.97594 | 1.47492  | 0.03983  | -4.05152 | 1.40191  | -0.35669 | 0.68408  | 4.22761  | 0.30103  |
| C | -2.55272 | 1.59472  | 0.20734  | -2.64322 | 1.57910  | -0.10702 | 1.10070  | 2.86806  | 0.08547  |
| C | -1.90381 | 2.82836  | 0.39316  | -1.99261 | 2.83335  | -0.00934 | 2.44900  | 2.45052  | -0.01805 |
| C | -0.51985 | 2.98670  | 0.20992  | -0.59202 | 3.01089  | 0.09081  | 2.86126  | 1.10088  | -0.12464 |
| C | 0.14299  | 4.26129  | 0.14884  | 0.05452  | 4.27450  | 0.33512  | 4.20963  | 0.68441  | -0.40251 |
| C | 1.43827  | 4.01296  | -0.19554 | 1.40152  | 4.03994  | 0.33107  | 4.20970  | -0.68403 | -0.40248 |
| C | 1.58404  | 2.58329  | -0.25295 | 1.57915  | 2.63226  | 0.08847  | 2.86137  | -1.10061 | -0.12460 |
| C | 2.81431  | 1.92656  | -0.42407 | 2.83464  | 1.98752  | -0.02796 | 2.44922  | -2.45030 | -0.01797 |
| C | 2.96259  | 0.53961  | -0.24273 | 3.01633  | 0.59111  | -0.14543 | 1.10096  | -2.86795 | 0.08552  |
| C | 4.24133  | -0.09542 | -0.06990 | 4.28815  | -0.05706 | -0.36432 | 0.68446  | -4.22755 | 0.30107  |
| C | 3.99158  | -1.39124 | 0.27349  | 4.05325  | -1.40056 | -0.36494 | -0.68408 | -4.22761 | 0.30104  |
| C | 2.56378  | -1.55724 | 0.24944  | 2.63694  | -1.57899 | -0.14632 | -1.10070 | -2.86806 | 0.08547  |
| C | 1.90641  | -2.78325 | 0.44506  | 1.99232  | -2.83098 | -0.02973 | -2.44900 | -2.45053 | -0.01804 |
| C | 0.52321  | -2.93486 | 0.24032  | 0.59253  | -3.01178 | 0.08672  | -2.86126 | -1.10088 | -0.12465 |
| C | -0.13065 | -4.21185 | 0.14871  | -0.05180 | -4.27588 | 0.32949  | -4.20964 | -0.68441 | -0.40251 |
| C | -1.42787 | -3.96408 | -0.19236 | -1.39850 | -4.03973 | 0.33461  | -4.20970 | 0.68403  | -0.40248 |
| C | -1.56597 | -2.53570 | -0.28131 | -1.57839 | -2.63173 | 0.09053  | -2.86136 | 1.10061  | -0.12461 |
| C | -2.79744 | -1.88495 | -0.47547 | -2.83572 | -1.98965 | -0.00864 | -2.44923 | 2.45030  | -0.01798 |
| H | -5.16922 | -0.27263 | -0.55379 | -5.22394 | -0.44893 | -0.53730 | -1.34176 | 5.06935  | 0.45675  |
| H | -4.68152 | 2.28774  | 0.12065  | -4.76184 | 2.19403  | -0.53820 | 1.34131  | 5.06947  | 0.45669  |
| H | -0.32304 | 5.21842  | 0.32304  | -0.44874 | 5.21299  | 0.51117  | 5.04124  | 1.34273  | -0.60289 |
| H | 2.22410  | 4.72985  | -0.37497 | 2.19401  | 4.75322  | 0.49901  | 5.04136  | -1.34228 | -0.60284 |
| H | 5.19700  | 0.39975  | -0.15052 | 5.22905  | 0.44766  | -0.52197 | 1.34176  | -5.06935 | 0.45676  |
| H | 4.70651  | -2.15958 | 0.52328  | 4.76711  | -2.19444 | -0.52326 | -1.34131 | -5.06947 | 0.45670  |
| H | 0.34771  | -5.16779 | 0.29797  | 0.45196  | -5.21568 | 0.49690  | -5.04124 | -1.34273 | -0.60290 |
| H | -2.22372 | -4.67667 | -0.34621 | -2.19007 | -4.75193 | 0.51130  | -5.04136 | 1.34228  | -0.60284 |
| C | 4.03637  | 2.72033  | -0.72375 | 4.05096  | 2.84312  | -0.01535 | 3.50368  | -3.49655 | -0.02740 |
| C | 4.71634  | 2.51228  | -1.93646 | 5.02744  | 2.68056  | 0.98398  | 3.50983  | -4.49935 | -1.01478 |
| C | 4.54350  | 3.65451  | 0.19596  | 4.23983  | 3.82706  | -1.00274 | 4.51444  | -3.49595 | 0.95197  |
| C | 5.86826  | 3.24280  | -2.23274 | 6.16212  | 3.49247  | 1.00027  | 4.50968  | -5.47222 | -1.02651 |
| H | 4.33106  | 1.78817  | -2.64831 | 4.88250  | 1.93073  | 1.75582  | 2.74276  | -4.49689 | -1.78321 |
| C | 5.70649  | 4.36897  | -0.09570 | 5.38671  | 4.62180  | -0.99637 | 5.49966  | -4.48367 | 0.95016  |
| H | 4.03898  | 3.79960  | 1.14647  | 3.49536  | 3.95043  | -1.78349 | 4.50911  | -2.73240 | 1.72387  |
| C | 6.36715  | 4.17026  | -1.31253 | 6.34727  | 4.46050  | 0.00763  | 5.50291  | -5.47054 | -0.04133 |
| H | 6.37641  | 3.08548  | -3.17922 | 6.90037  | 3.36955  | 1.78683  | 4.51427  | -6.22965 | -1.80436 |
| H | 6.09814  | 5.07693  | 0.62835  | 5.53008  | 5.36566  | -1.77413 | 6.26320  | -4.48342 | 1.72202  |
| H | 7.26791  | 4.73194  | -1.54026 | 7.23495  | 5.08558  | 0.01644  | 6.27535  | -6.23348 | -0.04667 |
| C | -2.74560 | 4.01219  | 0.71361  | -2.84384 | 4.05113  | -0.01155 | 3.50335  | 3.49688  | -0.02753 |
| C | -2.88460 | 5.07744  | -0.19286 | -3.83379 | 4.23103  | 0.97229  | 4.51414  | 3.49640  | 0.95181  |
| C | -3.44130 | 4.05437  | 1.93451  | -2.67288 | 5.04016  | -0.99789 | 3.50937  | 4.49964  | -1.01495 |
| C | -3.70114 | 6.16533  | 0.11987  | -4.62523 | 5.37991  | 0.97522  | 5.49926  | 4.48422  | 0.94995  |
| H | -2.37306 | 5.03790  | -1.14986 | -3.96299 | 3.47811  | 1.74383  | 4.50890  | 2.73288  | 1.72374  |
| C | -4.24153 | 5.15317  | 2.25176  | -3.48208 | 6.17655  | -1.00547 | 4.50912  | 5.47261  | -1.02673 |
| H | -3.34053 | 3.23145  | 2.63600  | -1.92002 | 4.90192  | -1.76794 | 2.74228  | 4.49709  | -1.78335 |
| C | -4.37525 | 6.20921  | 1.34476  | -4.45551 | 6.35212  | -0.01622 | 5.50238  | 5.47106  | -0.04158 |
| H | -3.81375 | 6.97560  | -0.59402 | -5.37297 | 5.51617  | 1.75052  | 6.26282  | 4.48408  | 1.72178  |
| H | -4.76167 | 5.18259  | 3.20432  | -3.35322 | 6.92364  | -1.78266 | 4.51362  | 6.23002  | -1.80460 |
| H | -5.00449 | 7.05960  | 1.58888  | -5.07839 | 7.24140  | -0.01805 | 6.27475  | 6.23408  | -0.04697 |
| C | -3.98082 | -2.71564 | -0.82209 | -4.04968 | -2.84630 | -0.00971 | -3.50369 | 3.49655  | -0.02740 |
| C | -4.00615 | -3.41595 | -2.04118 | -4.22529 | -3.83504 | -0.99552 | -4.51443 | 3.49595  | 0.95197  |
| C | -5.07030 | -2.83217 | 0.05873  | -5.04121 | -2.67909 | 0.97479  | -3.50983 | 4.49935  | -1.01479 |
| C | -5.10954 | -4.20033 | -2.38042 | -5.37210 | -4.62942 | -1.00184 | -5.49965 | 4.48367  | 0.95017  |
| H | -3.16658 | -3.33031 | -2.72469 | -3.47082 | -3.96076 | -1.76613 | -4.50910 | 2.73240  | 1.72388  |
| C | -6.16313 | -3.63324 | -0.27558 | -6.17554 | -3.49124 | 0.97897  | -4.50968 | 5.47222  | -1.02651 |
| H | -5.04631 | -2.31344 | 1.01232  | -4.90669 | -1.92663 | 1.74587  | -2.74277 | 4.49689  | -1.78321 |
| C | -6.18847 | -4.31332 | -1.49767 | -6.34658 | -4.46381 | -0.01190 | -5.50291 | 5.47054  | -0.04132 |
| H | -5.12535 | -4.72379 | -3.33147 | -5.50502 | -5.37625 | -1.77860 | -6.26319 | 4.48342  | 1.72203  |
| H | -6.99223 | -3.72854 | 0.41892  | -6.92456 | -3.36533 | 1.75478  | -4.51428 | 6.22965  | -1.80436 |
| H | -7.04268 | -4.93038 | -1.75894 | -7.23427 | -5.08895 | -0.01275 | -6.27535 | 6.23348  | -0.04666 |
| C | 2.69498  | -3.98913 | 0.81118  | 2.84623  | -4.04849 | -0.01753 | -3.50336 | -3.49688 | -0.02753 |
| C | 3.67459  | -4.50870 | -0.05302 | 3.81982  | -4.22732 | 0.98185  | -3.50937 | -4.49965 | -1.01494 |
| C | 2.44454  | -4.63772 | 2.03346  | 2.69005  | -5.03783 | -1.00524 | -4.51414 | -3.49640 | 0.95180  |

|    |         |          |          |          |          |          |          |          |          |
|----|---------|----------|----------|----------|----------|----------|----------|----------|----------|
| C  | 4.38953 | -5.65385 | 0.30084  | 4.61166  | -5.37611 | 0.99782  | -4.50912 | -5.47262 | -1.02672 |
| H  | 3.85542 | -4.02746 | -1.00944 | 3.93780  | -3.47309 | 1.75398  | -2.74227 | -4.49710 | -1.78334 |
| C  | 3.17548 | -5.77118 | 2.39236  | 3.49920  | -6.17459 | -0.99919 | -5.49927 | -4.48422 | 0.94994  |
| H  | 1.68799 | -4.24097 | 2.70396  | 1.94792  | -4.90104 | -1.78598 | -4.50892 | -2.73287 | 1.72373  |
| C  | 4.14684 | -6.28335 | 1.52621  | 4.45740  | -6.34918 | 0.00484  | -5.50239 | -5.47107 | -0.04158 |
| H  | 5.13277 | -6.05571 | -0.38102 | 5.34773  | -5.51126 | 1.78441  | -4.51362 | -6.23003 | -1.80459 |
| H  | 2.98498 | -6.25437 | 3.34577  | 3.38170  | -6.92271 | -1.77721 | -6.26283 | -4.48407 | 1.72177  |
| H  | 4.70910 | -7.16999 | 1.80273  | 5.08027  | -7.23842 | 0.01341  | -6.27475 | -6.23408 | -0.04697 |
| Co | 0.00416 | 0.01751  | 0.02867  | -0.01623 | 0.00287  | 0.10269  | 0.00001  | 0.00001  | 0.30134  |
| H  | 0.02873 | 0.01333  | 1.43740  | 0.39024  | -0.07185 | 1.52265  | 0.00001  | 0.00002  | 2.02327  |

### CrTPP, total charge 0

|   | Singlet  |          |          | Triplet  |          |          | Quintet  |          |          |
|---|----------|----------|----------|----------|----------|----------|----------|----------|----------|
| N | -1.43129 | 1.44305  | -0.01850 | -2.04334 | 0.00000  | -0.01832 | 2.04814  | 0.00000  | -0.01959 |
| N | 1.44443  | 1.42983  | 0.01815  | 0.00000  | 2.04361  | 0.00000  | 0.00000  | -2.04841 | 0.00000  |
| N | 1.43281  | -1.44045 | 0.03722  | 2.04334  | 0.00000  | 0.01832  | -2.04814 | 0.00000  | 0.01959  |
| N | -1.44600 | -1.42726 | -0.03761 | 0.00000  | -2.04362 | 0.00000  | 0.00000  | 2.04841  | 0.00000  |
| C | -2.80252 | 1.25709  | -0.02487 | -2.86795 | -1.10710 | 0.01283  | 2.87085  | 1.10760  | 0.01234  |
| C | -3.47030 | 2.53450  | -0.04506 | -4.24729 | -0.68190 | 0.07525  | 4.25065  | 0.68198  | 0.07598  |
| C | -2.49886 | 3.49412  | -0.02496 | -4.24729 | 0.68190  | 0.07525  | 4.25065  | -0.68198 | 0.07598  |
| C | -1.22939 | 2.81131  | -0.01609 | -2.86795 | 1.10710  | 0.01283  | 2.87085  | -1.10761 | 0.01234  |
| C | 0.01585  | 3.45989  | 0.00018  | -2.44811 | 2.44827  | 0.01374  | 2.44895  | -2.44912 | 0.01355  |
| C | 1.25508  | 2.79989  | 0.01602  | -1.10720 | 2.86879  | 0.00634  | 1.10770  | -2.87170 | 0.00629  |
| C | 2.53076  | 3.47103  | 0.02455  | -0.68191 | 4.24945  | -0.00117 | 0.68198  | -4.25288 | -0.00126 |
| C | 3.49336  | 2.50255  | 0.04401  | 0.68191  | 4.24945  | 0.00122  | -0.68198 | -4.25288 | 0.00121  |
| C | 2.81390  | 1.23131  | 0.02398  | 1.10720  | 2.86879  | -0.00632 | -1.10770 | -2.87170 | -0.00630 |
| C | 3.46416  | -0.01326 | 0.00137  | 2.44811  | 2.44827  | -0.01374 | -2.44895 | -2.44911 | -0.01355 |
| C | 2.80254  | -1.25213 | -0.01517 | 2.86795  | 1.10710  | -0.01285 | -2.87085 | -1.10760 | -0.01232 |
| C | 3.46847  | -2.52552 | -0.12687 | 4.24729  | 0.68190  | -0.07530 | -4.25065 | -0.68198 | -0.07593 |
| C | 2.49704  | -3.48514 | -0.14065 | 4.24729  | -0.68190 | -0.07530 | -4.25065 | 0.68198  | -0.07593 |
| C | 1.22952  | -2.80706 | -0.02852 | 2.86795  | -1.10711 | -0.01285 | -2.87085 | 1.10760  | -0.01233 |
| C | -0.01589 | -3.45721 | 0.00019  | 2.44811  | -2.44827 | -0.01374 | -2.44895 | 2.44912  | -0.01355 |
| C | -1.25529 | -2.79568 | 0.02856  | 1.10720  | -2.86879 | -0.00631 | -1.10770 | 2.87170  | -0.00630 |
| C | -2.52901 | -3.46204 | 0.14072  | 0.68190  | -4.24945 | 0.00122  | -0.68198 | 4.25288  | 0.00121  |
| C | -3.49158 | -2.49352 | 0.12643  | -0.68191 | -4.24945 | -0.00117 | 0.68198  | 4.25288  | -0.00126 |
| C | -2.81394 | -1.22634 | 0.01454  | -1.10720 | -2.86879 | 0.00633  | 1.10770  | 2.87170  | 0.00629  |
| C | -3.46415 | 0.01853  | -0.00236 | -2.44811 | -2.44827 | 0.01374  | 2.44895  | 2.44912  | 0.01355  |
| H | -4.54047 | 2.67834  | -0.07008 | -5.09938 | -1.34345 | 0.12801  | 5.10306  | 1.34306  | 0.12974  |
| H | -2.62931 | 4.56642  | -0.02021 | -5.09938 | 1.34345  | 0.12802  | 5.10306  | -1.34306 | 0.12973  |
| H | 2.67102  | 4.54210  | 0.01993  | -1.34310 | 5.10338  | -0.00712 | 1.34269  | -5.10720 | -0.00739 |
| H | 4.56481  | 2.63656  | 0.06859  | 1.34309  | 5.10338  | 0.00719  | -1.34270 | -5.10719 | 0.00732  |
| H | 4.53667  | -2.66538 | -0.20486 | 5.09938  | 1.34344  | -0.12810 | -5.10307 | -1.34306 | -0.12966 |
| H | 2.62622  | -4.55345 | -0.23391 | 5.09938  | -1.34345 | -0.12810 | -5.10307 | 1.34306  | -0.12966 |
| H | -2.66808 | -4.52908 | 0.23424  | 1.34309  | -5.10338 | 0.00720  | -1.34270 | 5.10719  | 0.00732  |
| H | -4.56104 | -2.62351 | 0.20423  | -1.34310 | -5.10338 | -0.00712 | 1.34270  | 5.10720  | -0.00739 |
| C | 4.96069  | -0.02265 | -0.02426 | 3.50825  | 3.50559  | -0.02985 | -3.50917 | -3.50644 | -0.03005 |
| C | 5.69033  | -0.45151 | 1.09557  | 4.29438  | 3.74532  | 1.10778  | -4.29884 | -3.74319 | 1.10581  |
| C | 5.66065  | 0.39232  | -1.16805 | 3.73590  | 4.27298  | -1.18270 | -3.73358 | -4.27695 | -1.18149 |
| C | 7.08754  | -0.46320 | 1.07393  | 5.28488  | 4.73103  | 1.09443  | -5.28941 | -4.72881 | 1.09212  |
| H | 5.15438  | -0.77208 | 1.98438  | 4.12161  | 3.15566  | 2.00357  | -4.12875 | -3.15119 | 2.00057  |
| C | 7.05772  | 0.37900  | -1.19236 | 4.72715  | 5.25786  | -1.19850 | -4.72488 | -5.26176 | -1.19769 |
| H | 5.10162  | 0.72130  | -2.03938 | 3.13288  | 4.08971  | -2.06742 | -3.12793 | -4.09613 | -2.06492 |
| C | 7.77546  | -0.04833 | -0.07073 | 5.50438  | 5.49010  | -0.05935 | -5.50557 | -5.49093 | -0.06028 |
| H | 7.63726  | -0.79398 | 1.95073  | 5.88231  | 4.90666  | 1.98471  | -5.88950 | -4.90201 | 1.98109  |
| H | 7.58408  | 0.69932  | -2.08718 | 4.89328  | 5.84062  | -2.10025 | -4.88838 | -5.84685 | -2.09841 |
| H | 8.86155  | -0.05815 | -0.08868 | 6.27465  | 6.25598  | -0.07074 | -6.27589 | -6.25675 | -0.07196 |
| C | 0.02278  | 4.95753  | 0.00073  | -3.50825 | 3.50559  | 0.02985  | 3.50917  | -3.50644 | 0.03005  |
| C | 0.34866  | 5.66966  | 1.16521  | -3.73595 | 4.27294  | 1.18272  | 3.73354  | -4.27700 | 1.18147  |
| C | -0.29640 | 5.67373  | -1.16310 | -4.29433 | 3.74537  | -1.10781 | 4.29888  | -3.74314 | -1.10579 |
| C | 0.35475  | 7.06720  | 1.16699  | -4.72719 | 5.25781  | 1.19853  | 4.72483  | -5.26181 | 1.19766  |
| H | 0.59408  | 5.12038  | 2.06973  | -3.13296 | 4.08962  | 2.06746  | 3.12785  | -4.09622 | 2.06488  |
| C | -0.28943 | 7.07127  | -1.16359 | -5.28483 | 4.73108  | -1.09445 | 5.28945  | -4.72876 | -1.09210 |
| H | -0.54688 | 5.12761  | -2.06815 | -4.12153 | 3.15574  | -2.00361 | 4.12883  | -3.15111 | -2.00053 |
| C | 0.03593  | 7.77206  | 0.00202  | -5.50437 | 5.49010  | 0.05935  | 5.50557  | -5.49094 | 0.06028  |
| H | 0.60611  | 7.60381  | 2.07762  | -4.89336 | 5.84054  | 2.10029  | 4.88830  | -5.84693 | 2.09837  |
| H | -0.53574 | 7.61104  | -2.07374 | -5.88222 | 4.90675  | -1.98475 | 5.88958  | -4.90194 | -1.98105 |
| H | 0.04101  | 8.85835  | 0.00251  | -6.27464 | 6.25598  | 0.07075  | 6.27589  | -6.25676 | 0.07196  |
| C | -4.96072 | 0.02288  | 0.02286  | -3.50825 | -3.50559 | 0.02984  | 3.50917  | 3.50644  | 0.03005  |
| C | -5.65715 | 0.44414  | 1.16650  | -3.73595 | -4.27294 | 1.18270  | 3.73354  | 4.27700  | 1.18147  |

|    |          |          |          |          |          |          |          |         |          |
|----|----------|----------|----------|----------|----------|----------|----------|---------|----------|
| C  | -5.69396 | -0.39912 | -1.09723 | -4.29433 | -3.74536 | -1.10783 | 4.29889  | 3.74314 | -1.10578 |
| C  | -7.05429 | 0.44370  | 1.19041  | -4.72720 | -5.25782 | 1.19850  | 4.72484  | 5.26180 | 1.19767  |
| H  | -5.09536 | 0.76785  | 2.03804  | -3.13297 | -4.08963 | 2.06745  | 3.12785  | 4.09621 | 2.06488  |
| C  | -7.09123 | -0.39792 | -1.07599 | -5.28483 | -4.73107 | -1.09448 | 5.28946  | 4.72876 | -1.09209 |
| H  | -5.16074 | -0.72455 | -1.98591 | -4.12152 | -3.15573 | -2.00363 | 4.12883  | 3.15111 | -2.00053 |
| C  | -7.77561 | 0.02315  | 0.06853  | -5.50438 | -5.49010 | 0.05933  | 5.50557  | 5.49093 | 0.06029  |
| H  | -7.57792 | 0.76876  | 2.08513  | -4.89337 | -5.84054 | 2.10027  | 4.88830  | 5.84693 | 2.09838  |
| H  | -7.64371 | -0.72353 | -1.95298 | -5.88222 | -4.90674 | -1.98478 | 5.88958  | 4.90194 | -1.98105 |
| H  | -8.86176 | 0.02336  | 0.08615  | -6.27465 | -6.25598 | 0.07071  | 6.27589  | 6.25676 | 0.07196  |
| C  | -0.02272 | -4.95313 | 0.00067  | 3.50825  | -3.50559 | -0.02984 | -3.50917 | 3.50644 | -0.03005 |
| C  | 0.45725  | -5.67060 | 1.10808  | 4.29437  | -3.74531 | 1.10780  | -4.29884 | 3.74319 | 1.10580  |
| C  | -0.50925 | -5.66704 | -1.10617 | 3.73591  | -4.27299 | -1.18268 | -3.73358 | 4.27695 | -1.18149 |
| C  | 0.44949  | -7.06780 | 1.11025  | 5.28487  | -4.73102 | 1.09446  | -5.28941 | 4.72881 | 1.09211  |
| H  | 0.83168  | -5.12453 | 1.96916  | 4.12160  | -3.15565 | 2.00359  | -4.12875 | 3.15119 | 2.00056  |
| C  | -0.51439 | -7.06425 | -1.10719 | 4.72715  | -5.25787 | -1.19848 | -4.72488 | 5.26176 | -1.19769 |
| H  | -0.87859 | -5.11824 | -1.96771 | 3.13289  | -4.08971 | -2.06741 | -3.12793 | 4.09613 | -2.06492 |
| C  | -0.03571 | -7.76904 | 0.00182  | 5.50438  | -5.49010 | -0.05932 | -5.50557 | 5.49093 | -0.06029 |
| H  | 0.81958  | -7.60725 | 1.97765  | 5.88230  | -4.90666 | 1.98474  | -5.88950 | 4.90202 | 1.98108  |
| H  | -0.88942 | -7.60097 | -1.97416 | 4.89328  | -5.84063 | -2.10022 | -4.88838 | 5.84685 | -2.09842 |
| H  | -0.04075 | -8.85532 | 0.00227  | 6.27465  | -6.25598 | -0.07071 | -6.27589 | 6.25676 | -0.07197 |
| Cr | -0.00004 | -0.00156 | -0.00015 | 0.00000  | 0.00000  | 0.00000  | 0.00000  | 0.00000 | 0.00000  |

### CrTPP, total charge 1

|   | Doublet  |          | Quartet  |          |          | Sextet   |          |          |          |
|---|----------|----------|----------|----------|----------|----------|----------|----------|----------|
| N | 2.04986  | 0.00000  | -0.04913 | -2.05480 | 0.00002  | -0.05153 | 2.05499  | -0.00001 | -0.05319 |
| N | 0.00000  | -2.05055 | -0.00002 | 0.00002  | 2.05547  | 0.00000  | -0.00001 | -2.05573 | 0.00001  |
| N | -2.04985 | 0.00000  | 0.04916  | 2.05481  | -0.00002 | 0.05153  | -2.05500 | 0.00001  | 0.05317  |
| N | 0.00000  | 2.05054  | -0.00002 | -0.00002 | -2.05548 | 0.00000  | 0.00001  | 2.05572  | 0.00001  |
| C | 2.87585  | 1.10245  | 0.00562  | -2.87880 | -1.10293 | 0.00429  | 2.87854  | 1.10267  | 0.00405  |
| C | 4.24920  | 0.68285  | 0.11393  | -4.25254 | -0.68291 | 0.11399  | 4.25195  | 0.68308  | 0.11634  |
| C | 4.24920  | -0.68286 | 0.11387  | -4.25253 | 0.68297  | 0.11402  | 4.25194  | -0.68311 | 0.11633  |
| C | 2.87586  | -1.10246 | 0.00555  | -2.87879 | 1.10297  | 0.00433  | 2.87853  | -1.10268 | 0.00404  |
| C | 2.45190  | -2.45243 | 0.01235  | -2.45275 | 2.45333  | 0.01179  | 2.45271  | -2.45332 | 0.01148  |
| C | 1.10268  | -2.87824 | 0.00678  | -1.10315 | 2.88123  | 0.00660  | 1.10289  | -2.88110 | 0.00633  |
| C | 0.68280  | -4.25566 | -0.00610 | -0.68285 | 4.25915  | -0.00601 | 0.68301  | -4.25890 | -0.00639 |
| C | -0.68280 | 4.25566  | 0.00572  | 0.68292  | -4.25914 | 0.00611  | -0.68305 | 4.25890  | 0.00664  |
| C | -1.10267 | -2.87824 | -0.00693 | 1.10320  | 2.88122  | -0.00656 | -1.10291 | -2.88109 | -0.00625 |
| C | -2.45189 | -2.45243 | -0.01236 | 2.45279  | -2.45329 | -0.01178 | -2.45274 | -2.45330 | -0.01149 |
| C | -2.87585 | -1.10246 | -0.00541 | 2.87880  | 1.10293  | -0.00437 | -2.87854 | -1.10267 | -0.00414 |
| C | -4.24922 | -0.68287 | -0.11351 | 4.25253  | 0.68291  | -0.11412 | -4.25193 | -0.68308 | -0.11658 |
| C | -4.24922 | 0.68285  | -0.11356 | 4.25252  | -0.68298 | -0.11409 | -4.25193 | 0.68311  | -0.11658 |
| C | -2.87586 | 1.10245  | -0.00548 | 2.87879  | -1.10297 | -0.00432 | -2.87852 | 1.10268  | -0.00414 |
| C | -2.45190 | 2.45242  | -0.01249 | 2.45275  | -2.45334 | -0.01171 | -2.45271 | 2.45332  | -0.01149 |
| C | -1.10267 | 2.87823  | -0.00700 | 1.10315  | -2.88124 | -0.00652 | -1.10289 | 2.88110  | -0.00624 |
| C | -0.68281 | 4.25565  | 0.00568  | 0.68285  | -4.25916 | 0.00614  | -0.68301 | 4.25890  | 0.00664  |
| C | 0.68280  | 4.25565  | -0.00604 | -0.68292 | -4.25915 | -0.00604 | 0.68305  | 4.25890  | -0.00638 |
| C | 1.10267  | 2.87823  | 0.00686  | -1.10320 | -2.88122 | 0.00655  | 1.10291  | 2.88109  | 0.00635  |
| C | 2.45189  | 2.45243  | 0.01249  | -2.45279 | -2.45330 | 0.01171  | 2.45274  | 2.45329  | 0.01150  |
| H | 5.09922  | 1.34100  | 0.20848  | -5.10280 | -1.34065 | 0.20951  | 5.10209  | 1.34061  | 0.21407  |
| H | 5.09922  | -1.34102 | 0.20837  | -5.10278 | 1.34072  | 0.20957  | 5.10208  | -1.34066 | 0.21406  |
| H | 1.34012  | -5.11122 | -0.02426 | -1.33974 | 5.11507  | -0.02428 | 1.33967  | -5.11496 | -0.02559 |
| H | -1.34012 | -5.11123 | 0.02374  | 1.33982  | 5.11505  | 0.02443  | -1.33971 | -5.11495 | 0.02593  |
| H | -5.09926 | -1.34103 | -0.20787 | 5.10279  | 1.34064  | -0.20970 | -5.10207 | -1.34061 | -0.21441 |
| H | -5.09926 | 1.34099  | -0.20798 | 5.10277  | -1.34073 | -0.20964 | -5.10206 | 1.34066  | -0.21441 |
| H | -1.34013 | 5.11122  | 0.02365  | 1.33974  | -5.11508 | 0.02448  | -1.33967 | 5.11496  | 0.02593  |
| H | 1.34012  | 5.11122  | -0.02415 | -1.33982 | -5.11506 | -0.02436 | 1.33972  | 5.11495  | -0.02557 |
| C | -3.50816 | -3.50187 | -0.03562 | 3.50913  | 3.50269  | -0.03569 | -3.50898 | -3.50233 | -0.03562 |
| C | -4.39830 | -3.63588 | 1.04419  | 4.40141  | 3.63529  | 1.04258  | -4.40485 | -3.63148 | 1.04027  |
| C | -3.63147 | -4.36637 | -1.13731 | 3.63060  | 4.36870  | -1.13646 | -3.62737 | -4.37179 | -1.13417 |
| C | -5.38421 | -4.62370 | 1.02629  | 5.38739  | 4.62301  | 1.02415  | -5.39086 | -4.61910 | 1.02184  |
| H | -4.30333 | -2.97516 | 1.90078  | 4.30800  | 2.97349  | 1.89849  | -4.31377 | -2.96730 | 1.89456  |
| C | -4.63127 | -5.33999 | -1.16040 | 4.63047  | 5.34222  | -1.16018 | -4.62751 | -5.34494 | -1.15810 |
| H | -2.95415 | -4.26004 | -1.97945 | 2.95176  | 4.26355  | -1.97752 | -2.94619 | -4.26911 | -1.97361 |
| C | -5.50600 | -5.47441 | -0.07724 | 5.50724  | 5.47516  | -0.07849 | -5.50759 | -5.47447 | -0.07865 |
| H | -6.05622 | -4.72824 | 1.87264  | 6.06098  | 4.72637  | 1.86939  | -6.06694 | -4.71989 | 1.86540  |
| H | -4.72715 | -5.99189 | -2.02333 | 4.72483  | 5.99521  | -2.02246 | -4.71959 | -6.00030 | -2.01882 |
| H | -6.27837 | -6.23724 | -0.09333 | 6.27967  | 6.23792  | -0.09503 | -6.28016 | -6.23708 | -0.09528 |
| C | 3.50816  | -3.50187 | 0.03562  | -3.50907 | 3.50274  | 0.03569  | 3.50895  | -3.50236 | 0.03561  |
| C | 3.63129  | -4.36656 | 1.13719  | -3.63058 | 4.36870  | 1.13649  | 3.62745  | -4.37169 | 1.13425  |
| C | 4.39849  | -3.63570 | -1.04406 | -4.40130 | 3.63541  | -1.04261 | 4.40470  | -3.63164 | -1.04036 |

|    |          |          |          |          |          |          |          |          |          |
|----|----------|----------|----------|----------|----------|----------|----------|----------|----------|
| C  | 4.63110  | -5.34017 | 1.16028  | -4.63044 | 5.34224  | 1.16021  | 4.62759  | -5.34485 | 1.15818  |
| H  | 2.95384  | -4.26036 | 1.97924  | -2.95179 | 4.26350  | 1.97758  | 2.94636  | -4.26891 | 1.97375  |
| C  | 5.38440  | -4.62352 | -1.02617 | -5.38727 | 4.62315  | -1.02419 | 5.39071  | -4.61926 | -1.02192 |
| H  | 4.30366  | -2.97484 | -1.90056 | -4.30786 | 2.97365  | -1.89856 | 4.31353  | -2.96755 | -1.89471 |
| C  | 5.50601  | -5.47441 | 0.07724  | -5.50716 | 5.47524  | 0.07848  | 5.50755  | -5.47451 | 0.07865  |
| H  | 4.72684  | -5.99221 | 2.02313  | -4.72482 | 5.99519  | 2.02252  | 4.71975  | -6.00011 | 2.01897  |
| H  | 6.05654  | -4.72792 | -1.87242 | -6.06081 | 4.72656  | -1.86946 | 6.06669  | -4.72015 | -1.86554 |
| H  | 6.27838  | -6.23724 | 0.09334  | -6.27957 | 6.23801  | 0.09502  | 6.28012  | -6.23712 | 0.09529  |
| C  | 3.50815  | 3.50187  | 0.03586  | -3.50913 | -3.50269 | 0.03555  | 3.50898  | 3.50233  | 0.03564  |
| C  | 3.63121  | 4.36650  | 1.13748  | -3.63070 | -4.36868 | 1.13632  | 3.62749  | 4.37166  | 1.13428  |
| C  | 4.39853  | 3.63577  | -1.04376 | -4.40132 | -3.63530 | -1.04279 | 4.40473  | 3.63161  | -1.04034 |
| C  | 4.63100  | 5.34013  | 1.16069  | -4.63057 | -5.34220 | 1.15997  | 4.62763  | 5.34481  | 1.15821  |
| H  | 2.95370  | 4.26026  | 1.97949  | -2.95193 | -4.26353 | 1.97743  | 2.94639  | 4.26888  | 1.97378  |
| C  | 5.38443  | 4.62360  | -1.02576 | -5.38732 | -4.62302 | -1.02443 | 5.39074  | 4.61923  | -1.02189 |
| H  | 4.30376  | 2.97496  | -1.90030 | -4.30785 | -2.97351 | -1.89871 | 4.31356  | 2.96752  | -1.89469 |
| C  | 5.50597  | 5.47443  | 0.07771  | -5.50726 | -5.47514 | 0.07821  | 5.50758  | 5.47447  | 0.07868  |
| H  | 4.72668  | 5.99213  | 2.02357  | -4.72500 | -5.99517 | 2.02225  | 4.71979  | 6.00007  | 2.01900  |
| H  | 6.05662  | 4.72806  | -1.87197 | -6.06084 | -4.72638 | -1.86972 | 6.06673  | 4.72012  | -1.86551 |
| H  | 6.27832  | 6.23727  | 0.09388  | -6.27969 | -6.23790 | 0.09470  | 6.28016  | 6.23708  | 0.09532  |
| C  | -3.50816 | 3.50187  | -0.03586 | 3.50908  | -3.50275 | -0.03555 | -3.50895 | 3.50236  | -0.03563 |
| C  | -4.39836 | 3.63594  | 1.04389  | 4.40131  | -3.63532 | 1.04276  | -4.40483 | 3.63152  | 1.04025  |
| C  | -3.63139 | 4.36632  | -1.13761 | 3.63059  | -4.36878 | -1.13628 | -3.62733 | 4.37181  | -1.13419 |
| C  | -5.38426 | 4.62377  | 1.02588  | 5.38729  | -4.62306 | 1.02440  | -5.39083 | 4.61914  | 1.02180  |
| H  | -4.30345 | 2.97526  | 1.90051  | 4.30788  | -2.97350 | 1.89865  | -4.31375 | 2.96734  | 1.89454  |
| C  | -4.63118 | 5.33994  | -1.16080 | 4.63045  | -5.34231 | -1.15994 | -4.62746 | 5.34497  | -1.15813 |
| H  | -2.95402 | 4.25993  | -1.97970 | 2.95178  | -4.26365 | -1.97737 | -2.94614 | 4.26912  | -1.97362 |
| C  | -5.50597 | 5.47442  | -0.07770 | 5.50718  | -5.47523 | -0.07821 | -5.50754 | 5.47452  | -0.07869 |
| H  | -6.05631 | 4.72836  | 1.87218  | 6.06084  | -4.72640 | 1.86967  | -6.06691 | 4.71995  | 1.86536  |
| H  | -4.72700 | 5.99180  | -2.02378 | 4.72483  | -5.99533 | -2.02220 | -4.71953 | 6.00032  | -2.01887 |
| H  | -6.27833 | 6.23726  | -0.09388 | 6.27960  | -6.23800 | -0.09470 | -6.28012 | 6.23713  | -0.09534 |
| Cr | 0.00000  | 0.00000  | 0.00000  | 0.00000  | 0.00000  | 0.00000  | 0.00000  | 0.00000  | 0.00000  |

### H-CrTPP, total charge 0

|   | Doublet  |          |          | Quartet  |          |          | Sextet   |          |          |
|---|----------|----------|----------|----------|----------|----------|----------|----------|----------|
| N | -2.02808 | 0.00197  | -0.02956 | -2.03766 | 0.00003  | -0.03708 | 2.04820  | 0.00003  | -0.03572 |
| N | 0.00077  | 2.03267  | -0.01490 | -0.00125 | 2.03611  | -0.01983 | -0.00007 | -2.04860 | -0.01590 |
| N | 2.02461  | -0.00198 | -0.00113 | 2.03402  | -0.00004 | -0.00288 | -2.04837 | -0.00011 | 0.00382  |
| N | -0.00323 | -2.03268 | -0.01491 | -0.00132 | -2.03611 | -0.01983 | -0.00022 | 2.04851  | -0.01597 |
| C | -2.85968 | -1.10305 | -0.01008 | -2.86417 | -1.10575 | -0.01150 | 2.87083  | 1.10765  | -0.00160 |
| C | -4.23824 | -0.67735 | 0.02746  | -4.24365 | -0.68163 | 0.03354  | 4.25045  | 0.68211  | 0.06461  |
| C | -4.23690 | 0.68563  | 0.02757  | -4.24362 | 0.68177  | 0.03356  | 4.25050  | -0.68189 | 0.06461  |
| C | -2.85750 | 1.10863  | -0.00992 | -2.86413 | 1.10585  | -0.01147 | 2.87090  | -1.10753 | -0.00160 |
| C | -2.44360 | 2.44768  | -0.00349 | -2.44740 | 2.44588  | -0.00653 | 2.44881  | -2.44902 | 0.00065  |
| C | -1.10383 | 2.86237  | -0.01142 | -1.10731 | 2.86253  | -0.01745 | 1.10762  | -2.87190 | -0.00705 |
| C | -0.67972 | 4.24141  | -0.02969 | -0.68367 | 4.24271  | -0.03884 | 0.68195  | -4.25303 | -0.01138 |
| C | 0.68383  | 4.24070  | -0.02819 | 0.67975  | 4.24325  | -0.03676 | -0.68207 | -4.25302 | -0.00879 |
| C | 1.10650  | 2.86104  | -0.02462 | 1.10443  | 2.86322  | -0.02995 | -1.10775 | -2.87194 | -0.01967 |
| C | 2.44531  | 2.44337  | -0.03172 | 2.44434  | 2.44614  | -0.03330 | -2.44901 | -2.44919 | -0.02605 |
| C | 2.85559  | 1.10305  | -0.03760 | 2.86010  | 1.10573  | -0.03630 | -2.87117 | -1.10774 | -0.02525 |
| C | 4.23248  | 0.67734  | -0.11547 | 4.23841  | 0.68163  | -0.10990 | -4.25109 | -0.68219 | -0.08494 |
| C | 4.23114  | -0.68564 | -0.11537 | 4.23839  | -0.68178 | -0.10988 | -4.25114 | 0.68181  | -0.08498 |
| C | 2.85342  | -1.10864 | -0.03747 | 2.86007  | -1.10583 | -0.03628 | -2.87125 | 1.10746  | -0.02530 |
| C | 2.44051  | -2.44815 | -0.03147 | 2.44426  | -2.44622 | -0.03326 | -2.44918 | 2.44894  | -0.02616 |
| C | 1.10088  | -2.86320 | -0.02447 | 1.10433  | -2.86326 | -0.02993 | -1.10795 | 2.87178  | -0.01978 |
| C | 0.67553  | -4.24204 | -0.02806 | 0.67960  | -4.24328 | -0.03674 | -0.68236 | 4.25289  | -0.00889 |
| C | -0.68803 | -4.24009 | -0.02976 | -0.68381 | -4.24269 | -0.03885 | 0.68165  | 4.25299  | -0.01144 |
| C | -1.10946 | -2.86023 | -0.01156 | -1.10741 | -2.86249 | -0.01748 | 1.10742  | 2.87189  | -0.00709 |
| C | -2.44841 | -2.44292 | -0.00375 | -2.44749 | -2.44580 | -0.00657 | 2.44864  | 2.44910  | 0.00065  |
| H | -5.09066 | -1.33958 | 0.06183  | -5.09560 | -1.34418 | 0.07306  | 5.10273  | 1.34322  | 0.12040  |
| H | -5.08801 | 1.34953  | 0.06202  | -5.09556 | 1.34436  | 0.07309  | 5.10282  | -1.34294 | 0.12040  |
| H | -1.34240 | 5.09408  | -0.04340 | -1.34651 | 5.09519  | -0.05495 | 1.34265  | -5.10737 | -0.01517 |
| H | 1.34715  | 5.09292  | -0.03163 | 1.34174  | 5.09649  | -0.04174 | -1.34279 | -5.10732 | -0.00016 |
| H | 5.08310  | 1.33978  | -0.17873 | 5.08887  | 1.34452  | -0.17080 | -5.10368 | -1.34329 | -0.13590 |
| H | 5.08046  | -1.34976 | -0.17853 | 5.08883  | -1.34470 | -0.17077 | -5.10378 | 1.34284  | -0.13597 |
| H | 1.33718  | -5.09554 | -0.03138 | 1.34156  | -5.09654 | -0.04171 | -1.34314 | 5.10715  | -0.00029 |
| H | -1.35236 | -5.09146 | -0.04354 | -1.34668 | -5.09515 | -0.05498 | 1.34230  | 5.10738  | -0.01522 |
| C | 3.50842  | 3.49745  | -0.04380 | 3.50566  | 3.50212  | -0.04396 | -3.50910 | -3.50669 | -0.03925 |
| C | 4.28180  | 3.74037  | 1.10167  | 4.27834  | 3.74513  | 1.10201  | -4.29702 | -3.74181 | 1.09816  |
| C | 3.75136  | 4.25674  | -1.19863 | 3.74808  | 4.26282  | -1.19802 | -3.73506 | -4.27913 | -1.18910 |
| C | 5.27575  | 4.72266  | 1.09376  | 5.27086  | 4.72886  | 1.09538  | -5.28732 | -4.72771 | 1.08757  |

|    |          |          |          |          |          |          |          |          |          |
|----|----------|----------|----------|----------|----------|----------|----------|----------|----------|
| H  | 4.09627  | 3.15631  | 1.99855  | 4.09328  | 3.16007  | 1.99834  | -4.12576 | -3.14827 | 1.99168  |
| C  | 4.74638  | 5.23795  | -1.20878 | 4.74166  | 5.24549  | -1.20686 | -4.72610 | -5.26421 | -1.20223 |
| H  | 3.15783  | 4.07039  | -2.08915 | 3.15534  | 4.07633  | -2.08904 | -3.13077 | -4.09954 | -2.07374 |
| C  | 5.51108  | 5.47404  | -0.06196 | 5.50556  | 5.48167  | -0.05953 | -5.50500 | -5.49177 | -0.06327 |
| H  | 5.86360  | 4.90150  | 1.98972  | 5.85806  | 4.90773  | 1.99176  | -5.88605 | -4.89965 | 1.97771  |
| H  | 4.92501  | 5.81491  | -2.11184 | 4.91984  | 5.82347  | -2.10937 | -4.89080 | -5.85083 | -2.10174 |
| H  | 6.28411  | 6.23718  | -0.06895 | 6.27748  | 6.24593  | -0.06552 | -6.27513 | -6.25783 | -0.07255 |
| C  | -3.50200 | 3.50659  | 0.01400  | -3.50593 | 3.50457  | 0.01402  | 3.50911  | -3.50621 | 0.02061  |
| C  | -3.74444 | 4.25215  | 1.17784  | -3.73775 | 4.25793  | 1.17509  | 3.73178  | -4.27459 | 1.17383  |
| C  | -4.26851 | 3.77020  | -1.13139 | -4.28390 | 3.75996  | -1.12559 | 4.30073  | -3.74486 | -1.11347 |
| C  | -4.73275 | 5.23996  | 1.19669  | -4.72655 | 5.24515  | 1.19685  | 4.72324  | -5.25914 | 1.19350  |
| H  | -3.15563 | 4.04960  | 2.06791  | -3.14036 | 4.06169  | 2.06083  | 3.12456  | -4.09229 | 2.05590  |
| C  | -5.25593 | 4.75904  | -1.11470 | -5.27173 | 4.74831  | -1.10603 | 5.29146  | -4.73025 | -1.09634 |
| H  | -4.08332 | 3.19725  | -2.03556 | -4.10714 | 3.18107  | -2.02764 | 4.13198  | -3.15453 | -2.00960 |
| C  | -5.49106 | 5.49647  | 0.05000  | -5.49610 | 5.49347  | 0.05586  | 5.50587  | -5.49022 | 0.05780  |
| H  | -4.91115 | 5.80619  | 2.10654  | -4.89662 | 5.81727  | 2.10462  | 4.88537  | -5.84257 | 2.09555  |
| H  | -5.83875 | 4.95384  | -2.01064 | -5.86326 | 4.93672  | -1.99763 | 5.89309  | -4.90496 | -1.98398 |
| H  | -6.25896 | 6.26467  | 0.06393  | -6.26437 | 6.26125  | 0.07204  | 6.27634  | -6.25585 | 0.07216  |
| C  | -3.50890 | -3.49973 | 0.01355  | -3.50605 | -3.50445 | 0.01394  | 3.50886  | 3.50637  | 0.02063  |
| C  | -3.75293 | -4.24492 | 1.17730  | -3.73792 | -4.25782 | 1.17500  | 3.73147  | 4.27476  | 1.17386  |
| C  | -4.27586 | -3.76168 | -1.13193 | -4.28401 | -3.75980 | -1.12569 | 4.30047  | 3.74510  | -1.11345 |
| C  | -4.74323 | -5.23074 | 1.19597  | -4.72676 | -5.24501 | 1.19673  | 4.72285  | 5.25938  | 1.19354  |
| H  | -3.16378 | -4.04364 | 2.06743  | -3.14054 | -4.06161 | 2.06076  | 3.12427  | 4.09239  | 2.05592  |
| C  | -5.26527 | -4.74853 | -1.11541 | -5.27188 | -4.74810 | -1.10616 | 5.29112  | 4.73057  | -1.09630 |
| H  | -4.08945 | -3.18901 | -2.03602 | -4.10721 | -3.18090 | -2.02773 | 4.13177  | 3.15477  | -2.00958 |
| C  | -5.50197 | -5.48560 | 0.04920  | -5.49630 | -5.49327 | 0.05572  | 5.50546  | 5.49054  | 0.05786  |
| H  | -4.92284 | -5.79670 | 2.10575  | -4.89687 | -5.81713 | 2.10448  | 4.88493  | 5.84281  | 2.09560  |
| H  | -5.84842 | -4.94206 | -2.01141 | -5.86340 | -4.93648 | -1.99777 | 5.89274  | 4.90534  | -1.98394 |
| H  | -6.27141 | -6.25226 | 0.06299  | -6.26460 | -6.26102 | 0.07188  | 6.27588  | 6.25623  | 0.07222  |
| C  | 3.50155  | -3.50431 | -0.04338 | 3.50555  | -3.50224 | -0.04389 | -3.50935 | 3.50636  | -0.03942 |
| C  | 4.27434  | -3.74865 | 1.10219  | 4.27819  | -3.74526 | 1.10211  | -4.29731 | 3.74149  | 1.09796  |
| C  | 3.74310  | -4.26419 | -1.19812 | 3.74796  | -4.26297 | -1.19793 | -3.73532 | 4.27873  | -1.18931 |
| C  | 5.26635  | -4.73292 | 1.09447  | 5.27068  | -4.72902 | 1.09551  | -5.28767 | 4.72732  | 1.08730  |
| H  | 4.08988  | -3.16414 | 1.99900  | 4.09314  | -3.16018 | 1.99842  | -4.12602 | 3.14800  | 1.99152  |
| C  | 4.73617  | -5.24737 | -1.20807 | 4.74150  | -5.24567 | -1.20674 | -4.72643 | 5.26375  | -1.20250 |
| H  | 3.15002  | -4.07675 | -2.08871 | 3.15524  | -4.07647 | -2.08896 | -3.13101 | 4.09915  | -2.07393 |
| C  | 5.50029  | -5.48487 | -0.06116 | 5.50537  | -5.48185 | -0.05939 | -5.50537 | 5.49132  | -0.06358 |
| H  | 5.85375  | -4.91283 | 1.99050  | 5.85786  | -4.90790 | 1.99190  | -5.88643 | 4.89927  | 1.97742  |
| H  | 4.91373  | -5.82478 | -2.11106 | 4.91968  | -5.82367 | -2.10923 | -4.89115 | 5.85032  | -2.10205 |
| H  | 6.27180  | -6.24954 | -0.06801 | 6.27728  | -6.24614 | -0.06536 | -6.27555 | 6.25732  | -0.07291 |
| Cr | -0.00227 | 0.00000  | 0.16409  | -0.00268 | 0.00000  | 0.16580  | -0.00013 | -0.00005 | -0.02461 |
| H  | -0.02224 | 0.00005  | 1.72639  | -0.02520 | 0.00000  | 1.74295  | 0.02404  | 0.01379  | 3.50752  |

### CuTPP, total charge 0

|   | Doublet  |          |          | Quartet  |          |          | Sextet   |          |          |
|---|----------|----------|----------|----------|----------|----------|----------|----------|----------|
| N | 2.02449  | 0.00002  | -0.01750 | -0.00322 | -2.03577 | -0.02860 | -2.03964 | -0.00001 | -0.03010 |
| N | 0.00002  | -2.02479 | 0.00000  | -2.04497 | 0.00323  | -0.00001 | 0.00000  | 2.04050  | 0.00001  |
| N | -2.02449 | -0.00001 | 0.01750  | 0.00321  | 2.03577  | 0.02861  | 2.03964  | -0.00001 | 0.03007  |
| N | -0.00001 | 2.02479  | 0.00000  | 2.04495  | -0.00323 | 0.00001  | 0.00000  | -2.04054 | 0.00001  |
| C | 2.85157  | 1.10240  | 0.01247  | 1.09532  | -2.86995 | 0.02117  | -2.87195 | -1.10369 | 0.01236  |
| C | 4.23252  | 0.68090  | 0.07229  | 0.68608  | -4.22538 | 0.11430  | -4.24827 | -0.68398 | 0.09506  |
| C | 4.23253  | -0.68084 | 0.07231  | -0.69945 | -4.22320 | 0.11417  | -4.24827 | 0.68392  | 0.09526  |
| C | 2.85158  | -1.10235 | 0.01251  | -1.10438 | -2.86647 | 0.02099  | -2.87196 | 1.10367  | 0.01265  |
| C | 2.44182  | -2.44193 | 0.01324  | -2.46756 | -2.43290 | 0.01734  | -2.45647 | 2.45686  | 0.01433  |
| C | 1.10248  | -2.85236 | 0.00633  | -2.87749 | -1.09982 | 0.01035  | -1.10382 | 2.87382  | 0.00801  |
| C | 0.68091  | -4.23452 | -0.00101 | -4.26143 | -0.67263 | -0.00146 | -0.68395 | 4.25251  | -0.00274 |
| C | -0.68085 | -4.23453 | 0.00092  | -4.25928 | 0.68609  | 0.00138  | 0.68394  | 4.25251  | 0.00294  |
| C | -1.10244 | -2.85238 | -0.00636 | -2.87400 | 1.10890  | -0.01034 | 1.10382  | 2.87383  | -0.00793 |
| C | -2.44178 | -2.44196 | -0.01324 | -2.45986 | 2.44068  | -0.01731 | 2.45647  | 2.45686  | -0.01433 |
| C | -2.85157 | -1.10239 | -0.01248 | -1.09533 | 2.86995  | -0.02095 | 2.87196  | 1.10367  | -0.01273 |
| C | -4.23252 | -0.68090 | -0.07221 | -0.68611 | 4.22539  | -0.11410 | 4.24826  | 0.68392  | -0.09546 |
| C | -4.23253 | 0.68084  | -0.07219 | 0.69942  | 4.22320  | -0.11421 | 4.24826  | -0.68398 | -0.09526 |
| C | -2.85158 | 1.10236  | -0.01244 | 1.10436  | 2.86648  | -0.02114 | 2.87195  | -1.10370 | -0.01244 |
| C | -2.44182 | 2.44193  | -0.01318 | 2.46754  | 2.43290  | -0.01766 | 2.45647  | -2.45689 | -0.01379 |
| C | -1.10248 | 2.85236  | -0.00633 | 2.87747  | 1.09982  | -0.01055 | 1.10383  | -2.87386 | -0.00764 |
| C | -0.68091 | 4.23452  | 0.00094  | 4.26141  | 0.67263  | 0.00127  | 0.68394  | -4.25254 | 0.00314  |
| C | 0.68085  | 4.23453  | -0.00104 | 4.25926  | -0.68609 | -0.00132 | -0.68394 | -4.25254 | -0.00294 |
| C | 1.10244  | 2.85238  | 0.00629  | 2.87398  | -1.10890 | 0.01050  | -1.10383 | -2.87386 | 0.00772  |



|    |          |          |          |          |          |          |          |          |          |
|----|----------|----------|----------|----------|----------|----------|----------|----------|----------|
| C  | 2.44178  | 2.44196  | 0.01318  | 2.45984  | -2.44067 | 0.01764  | -2.45647 | -2.45689 | 0.01379  |
| H  | 5.08211  | 1.34574  | 0.12280  | 1.34332  | -5.07827 | 0.19043  | -5.09688 | -1.34722 | 0.16681  |
| H  | 5.08213  | -1.34566 | 0.12285  | -1.35940 | -5.07400 | 0.19019  | -5.09688 | 1.34714  | 0.16720  |
| H  | 1.34542  | -5.08580 | -0.00671 | -5.11520 | -1.33336 | -0.01130 | -1.34662 | 5.10441  | -0.01367 |
| H  | -1.34535 | -5.08582 | 0.00657  | -5.11096 | 1.34951  | 0.01116  | 1.34661  | 5.10441  | 0.01393  |
| H  | -5.08212 | -1.34574 | -0.12271 | -1.34337 | 5.07828  | -0.19008 | 5.09687  | 1.34714  | -0.16746 |
| H  | -5.08214 | 1.34567  | -0.12266 | 1.35935  | 5.07401  | -0.19032 | 5.09686  | -1.34722 | -0.16707 |
| H  | -1.34543 | 5.08580  | 0.00662  | 5.11518  | 1.33336  | 0.01096  | 1.34661  | -5.10445 | 0.01432  |
| H  | 1.34535  | 5.08582  | -0.00676 | 5.11094  | -1.34952 | -0.01100 | -1.34661 | -5.10445 | -0.01406 |
| C  | -3.50170 | -3.49921 | -0.02881 | -3.50580 | 3.50406  | -0.03419 | 3.51291  | 3.50836  | -0.03390 |
| C  | -4.27553 | -3.75040 | 1.11462  | -3.67832 | 4.34978  | 1.07401  | 4.35780  | 3.69380  | 1.07315  |
| C  | -3.74102 | -4.25481 | -1.18692 | -4.32974 | 3.68238  | -1.15709 | 3.68690  | 4.33069  | -1.15964 |
| C  | -5.26588 | -4.73631 | 1.10173  | -4.66155 | 5.34127  | 1.06442  | 5.34871  | 4.67840  | 1.05695  |
| H  | -4.09355 | -3.16957 | 2.01436  | -3.03997 | 4.22015  | 1.94288  | 4.22846  | 3.06317  | 1.94805  |
| C  | -4.73226 | -5.23975 | -1.20226 | -5.30692 | 4.68100  | -1.17072 | 4.68078  | 5.31225  | -1.17885 |
| H  | -3.14712 | -4.06257 | -2.07592 | -4.19458 | 3.03756  | -2.02051 | 3.04078  | 4.19070  | -2.02147 |
| C  | -5.49734 | -5.48368 | -0.05734 | -5.47780 | 5.51133  | -0.05897 | 5.51416  | 5.49023  | -0.06983 |
| H  | -5.85399 | -4.92105 | 1.99636  | -4.78960 | 5.98068  | 1.93330  | 5.98898  | 4.81239  | 1.92441  |
| H  | -4.90766 | -5.81358 | -2.10796 | -5.93214 | 4.81020  | -2.04971 | 4.80557  | 5.93497  | -2.06033 |
| H  | -6.26754 | -6.24965 | -0.06836 | -6.23956 | 6.28566  | -0.06786 | 6.28585  | 6.25461  | -0.08369 |
| C  | 3.50175  | -3.49916 | 0.02881  | -3.51683 | -3.49300 | 0.03420  | -3.51291 | 3.50836  | 0.03390  |
| C  | 3.74101  | -4.25484 | 1.18688  | -4.34128 | -3.66878 | 1.15713  | -3.68700 | 4.33059  | 1.15970  |
| C  | 4.27566  | -3.75026 | -1.11459 | -3.69203 | -4.33814 | -1.07401 | -4.35770 | 3.69390  | -1.07321 |
| C  | 4.73226  | -5.23976 | 1.20222  | -5.32160 | -4.66432 | 1.17075  | -4.68088 | 5.31215  | 1.17890  |
| H  | 3.14704  | -4.06267 | 2.07585  | -4.20409 | -3.02442 | 2.02057  | -3.04095 | 4.19052  | 2.02157  |
| C  | 5.26603  | -4.73616 | -1.10170 | -4.67838 | -5.32652 | -1.06444 | -5.34862 | 4.67850  | -1.05701 |
| H  | 4.09373  | -3.16937 | -2.01430 | -3.05331 | -4.21046 | -1.94291 | -4.22829 | 3.06334  | -1.94815 |
| C  | 5.49742  | -5.48360 | 0.05734  | -5.49513 | -5.49406 | 0.05896  | -5.51416 | 5.49023  | 0.06983  |
| H  | 4.90760  | -5.81365 | 2.10789  | -5.94721 | -4.79158 | 2.04974  | -4.80574 | 5.93479  | 2.06043  |
| H  | 5.85420  | -4.92082 | -1.99630 | -4.80846 | -5.96548 | -1.93335 | -5.98881 | 4.81256  | -1.92451 |
| H  | 6.26763  | -6.24956 | 0.06836  | -6.25932 | -6.26599 | 0.06785  | -6.28584 | 6.25461  | 0.08369  |
| C  | 3.50170  | 3.49921  | 0.02870  | 3.50580  | -3.50405 | 0.03475  | -3.51293 | -3.50837 | 0.03294  |
| C  | 3.74098  | 4.25492  | 1.18675  | 4.32964  | -3.68216 | 1.15775  | -3.68731 | -4.33081 | 1.15855  |
| C  | 4.27558  | 3.75030  | -1.11472 | 3.67843  | -4.34993 | -1.07329 | -4.35751 | -3.69365 | -1.07438 |
| C  | 4.73222  | 5.23985  | 1.20204  | 5.30685  | -4.68076 | 1.17162  | -4.68124 | -5.31232 | 1.17735  |
| H  | 3.14704  | 4.06276  | 2.07574  | 4.19441  | -3.03721 | 2.02106  | -3.04144 | -4.19092 | 2.02059  |
| C  | 5.26594  | 4.73620  | -1.10188 | 4.66168  | -5.34139 | -1.06347 | -5.34847 | -4.67821 | -1.05858 |
| H  | 4.09364  | 3.16939  | -2.01441 | 3.04015  | -4.22045 | -1.94225 | -4.22789 | -3.06293 | -1.94917 |
| C  | 5.49735  | 5.48368  | 0.05714  | 5.47784  | -5.51126 | 0.06001  | -5.51429 | -5.49015 | 0.06807  |
| H  | 4.90758  | 5.81376  | 2.10770  | 5.93200  | -4.80981 | 2.05068  | -4.80632 | -5.93513 | 2.05873  |
| H  | 5.85409  | 4.92086  | -1.99650 | 4.78982  | -5.98093 | -1.93225 | -5.98849 | -4.81208 | -1.92624 |
| H  | 6.26755  | 6.24964  | 0.06811  | 6.23963  | -6.28558 | 0.06909  | -6.28601 | -6.25450 | 0.08161  |
| C  | -3.50175 | 3.49916  | -0.02870 | 3.51682  | 3.49298  | -0.03478 | 3.51293  | -3.50837 | -0.03294 |
| C  | -4.27556 | 3.75031  | 1.11476  | 3.69222  | 4.33822  | 1.07334  | 4.35760  | -3.69356 | 1.07432  |
| C  | -3.74112 | 4.25479  | -1.18679 | 4.34110  | 3.66863  | -1.15785 | 3.68721  | -4.33091 | -1.15849 |
| C  | -5.26593 | 4.73620  | 1.10192  | 4.67859  | 5.32657  | 1.06351  | 5.34857  | -4.67812 | 1.05853  |
| H  | -4.09355 | 3.16946  | 2.01448  | 3.05364  | 4.21064  | 1.94235  | 4.22806  | -3.06275 | 1.94907  |
| C  | -4.73238 | 5.23970  | -1.20208 | 5.32145  | 4.66415  | -1.17171 | 4.68114  | -5.31242 | -1.17729 |
| H  | -3.14724 | 4.06257  | -2.07580 | 4.20377  | 3.02419  | -2.02120 | 3.04127  | -4.19110 | -2.02049 |
| C  | -5.49743 | 5.48359  | -0.05714 | 5.49517  | 5.49399  | -0.06003 | 5.51429  | -5.49015 | -0.06807 |
| H  | -5.85402 | 4.92091  | 1.99656  | 4.80883  | 5.96561  | 1.93235  | 5.98866  | -4.81191 | 1.92614  |
| H  | -4.90780 | 5.81355  | -2.10776 | 5.94693  | 4.79131  | -2.05081 | 4.80615  | -5.93530 | -2.05863 |
| H  | -6.26764 | 6.24955  | -0.06812 | 6.25939  | 6.26590  | -0.06910 | 6.28601  | -6.25450 | -0.08161 |
| Cu | 0.00000  | 0.00000  | 0.00000  | -0.00001 | 0.00000  | 0.00000  | 0.00000  | -0.00001 | 0.00000  |

### CuTPP, total charge 1

|   | Singlet  |          | Triplet  |          |          | Quintet  |          |          |          |
|---|----------|----------|----------|----------|----------|----------|----------|----------|----------|
| N | 0.29146  | 2.00304  | -0.07502 | -2.03117 | 0.00000  | -0.04820 | 2.03160  | -0.00014 | -0.03804 |
| N | 2.00304  | -0.29146 | 0.07502  | 0.00000  | 2.03168  | 0.00001  | -0.00013 | -2.02994 | -0.00009 |
| N | -0.29146 | -2.00304 | -0.07502 | 2.03117  | 0.00001  | 0.04818  | -2.03157 | 0.00015  | 0.03813  |
| N | -2.00304 | 0.29146  | 0.07502  | 0.00001  | -2.03168 | 0.00001  | 0.00014  | 2.02996  | -0.00009 |
| C | -0.68327 | 2.93918  | 0.21744  | -2.85946 | -1.09806 | 0.00577  | 2.86194  | 1.10301  | 0.00828  |
| C | -0.08720 | 4.14521  | 0.72358  | -4.23402 | -0.68195 | 0.11185  | 4.25756  | 0.67410  | 0.10177  |
| C | 1.26338  | 3.94864  | 0.72513  | -4.23403 | 0.68194  | 0.11182  | 4.25747  | -0.67465 | 0.10185  |
| C | 1.49209  | 2.62267  | 0.21970  | -2.85947 | 1.09806  | 0.00572  | 2.86179  | -1.10338 | 0.00840  |
| C | 2.76195  | 2.06047  | 0.00204  | -2.44589 | 2.44630  | 0.01270  | 2.46648  | -2.43857 | 0.01719  |
| C | 2.93918  | 0.68327  | -0.21744 | -1.09828 | 2.86160  | 0.00765  | 1.09699  | -2.86212 | 0.00889  |
| C | 4.14521  | 0.08720  | -0.72358 | -0.68190 | 4.24002  | -0.00530 | 0.68543  | -4.23645 | -0.00426 |
| C | 3.94865  | -1.26338 | -0.72513 | 0.68189  | 4.24002  | 0.00546  | -0.68601 | -4.23635 | 0.00323  |
| C | 2.62267  | -1.49209 | -0.21970 | 1.09828  | 2.86160  | -0.00759 | -1.09739 | -2.86198 | -0.00934 |

|    |          |          |          |          |          |          |          |          |          |
|----|----------|----------|----------|----------|----------|----------|----------|----------|----------|
| C  | 2.06048  | -2.76195 | -0.00204 | 2.44588  | 2.44632  | -0.01270 | -2.46681 | -2.43822 | -0.01723 |
| C  | 0.68327  | -2.93918 | 0.21744  | 2.85946  | 1.09806  | -0.00579 | -2.86193 | -1.10300 | -0.00810 |
| C  | 0.08720  | -4.14521 | 0.72359  | 4.23402  | 0.68196  | -0.11197 | -4.25759 | -0.67408 | -0.10105 |
| C  | -1.26338 | -3.94864 | 0.72514  | 4.23402  | -0.68193 | -0.11200 | -4.25749 | 0.67467  | -0.10096 |
| C  | -1.49209 | -2.62267 | 0.21970  | 2.85947  | -1.09805 | -0.00583 | -2.86177 | 1.10339  | -0.00798 |
| C  | -2.76196 | -2.06048 | 0.00204  | 2.44589  | -2.44630 | -0.01278 | -2.46647 | 2.43857  | -0.01702 |
| C  | -2.93918 | -0.68327 | -0.21744 | 1.09828  | -2.86159 | -0.00763 | -1.09698 | 2.86213  | -0.00924 |
| C  | -4.14521 | -0.08720 | -0.72359 | 0.68190  | -4.24002 | 0.00542  | -0.68542 | 4.23646  | 0.00329  |
| C  | -3.94864 | 1.26338  | -0.72513 | -0.68189 | -4.24002 | -0.00527 | 0.68602  | 4.23636  | -0.00436 |
| C  | -2.62267 | 1.49209  | -0.21970 | -1.09827 | -2.86160 | 0.00769  | 1.09740  | 2.86199  | 0.00876  |
| C  | -2.06047 | 2.76195  | -0.00204 | -2.44588 | -2.44631 | 0.01277  | 2.46682  | 2.43824  | 0.01697  |
| H  | -0.63516 | 5.01200  | 1.06219  | -5.08186 | -1.34299 | 0.20485  | 5.10221  | 1.34054  | 0.18781  |
| H  | 2.03489  | 4.62342  | 1.06527  | -5.08186 | 1.34299  | 0.20479  | 5.10203  | -1.34120 | 0.18798  |
| H  | 5.01201  | 0.63516  | -1.06218 | -1.34218 | 5.09321  | -0.02337 | 1.34755  | -5.08807 | -0.01928 |
| H  | 4.62342  | -2.03489 | -1.06527 | 1.34216  | 5.09321  | 0.02359  | -1.34825 | -5.08790 | 0.01792  |
| H  | 0.63516  | -5.01200 | 1.06219  | 5.08184  | 1.34300  | -0.20499 | -5.10227 | -1.34051 | -0.18688 |
| H  | -2.03489 | -4.62341 | 1.06529  | 5.08185  | -1.34297 | -0.20505 | -5.10208 | 1.34123  | -0.18671 |
| H  | -5.01200 | -0.63516 | -1.06219 | 1.34218  | -5.09320 | 0.02352  | -1.34754 | 5.08810  | 0.01805  |
| H  | -4.62342 | 2.03489  | -1.06527 | -1.34216 | -5.09321 | -0.02332 | 1.34825  | 5.08791  | -0.01946 |
| C  | 2.94569  | -3.94910 | -0.00363 | 3.50188  | 3.49570  | -0.03563 | -3.51731 | -3.49336 | -0.03658 |
| C  | 2.64589  | -5.06342 | -0.81090 | 4.38713  | 3.63411  | 1.04755  | -4.38298 | -3.65393 | 1.05862  |
| C  | 4.10025  | -3.98138 | 0.80210  | 3.62963  | 4.35558  | -1.14034 | -3.65779 | -4.33990 | -1.14995 |
| C  | 3.48672  | -6.17600 | -0.81957 | 5.37291  | 4.62211  | 1.02988  | -5.36840 | -4.64360 | 1.04115  |
| H  | 1.76668  | -5.04024 | -1.44723 | 4.28863  | 2.97671  | 1.90630  | -4.27147 | -3.01065 | 1.92678  |
| C  | 4.92645  | -5.10491 | 0.80771  | 4.62944  | 5.32922  | -1.16308 | -4.65236 | -5.31917 | -1.17036 |
| H  | 4.32987  | -3.13332 | 1.43969  | 2.95575  | 4.24580  | -1.98480 | -2.99643 | -4.21722 | -2.00277 |
| C  | 4.62510  | -6.20183 | -0.00670 | 5.49938  | 5.46822  | -0.07665 | -5.50736 | -5.47554 | -0.07399 |
| H  | 3.25522  | -7.02104 | -1.46064 | 6.04125  | 4.73021  | 1.87867  | -6.02450 | -4.76489 | 1.89774  |
| H  | 5.80323  | -5.12547 | 1.44763  | 4.72891  | 5.97766  | -2.02820 | -4.76065 | -5.95786 | -2.04173 |
| H  | 5.27404  | -7.07232 | -0.00789 | 6.27168  | 6.23112  | -0.09250 | -6.27655 | -6.24160 | -0.08900 |
| C  | 3.94910  | 2.94568  | 0.00363  | -3.50189 | 3.49569  | 0.03563  | 3.51683  | -3.49385 | 0.03660  |
| C  | 5.06342  | 2.64588  | 0.81090  | -3.62971 | 4.35550  | 1.14039  | 3.65672  | -4.34083 | 1.14972  |
| C  | 3.98139  | 4.10025  | -0.80210 | -4.38707 | 3.63416  | -1.04760 | 4.38296  | -3.65413 | -1.05828 |
| C  | 6.17600  | 3.48671  | 0.81957  | -4.62952 | 5.32913  | 1.16312  | 4.65114  | -5.32024 | 1.17019  |
| H  | 5.04025  | 1.76667  | 1.44723  | -2.95589 | 4.24567  | 1.98489  | 2.99501  | -4.21838 | 2.00229  |
| C  | 5.10491  | 4.92644  | -0.80771 | -5.37285 | 4.62216  | -1.02993 | 5.36823  | -4.64396 | -1.04076 |
| H  | 3.13332  | 4.32987  | -1.43969 | -4.28851 | 2.97682  | -1.90638 | 4.27190  | -3.01053 | -1.92626 |
| C  | 6.20184  | 4.62509  | 0.00670  | -5.49939 | 5.46821  | 0.07664  | 5.50660  | -5.47632 | 0.07413  |
| H  | 7.02105  | 3.25520  | 1.46064  | -4.72905 | 5.97753  | 2.02827  | 4.75897  | -5.95926 | 2.04138  |
| H  | 5.12548  | 5.80323  | -1.44763 | -6.04113 | 4.73032  | -1.87876 | 6.02468  | -4.76502 | -1.89712 |
| H  | 7.07233  | 5.27403  | 0.00789  | -6.27170 | 6.23111  | 0.09249  | 6.27567  | -6.24249 | 0.08919  |
| C  | -2.94569 | 3.94910  | -0.00363 | -3.50188 | -3.49570 | 0.03576  | 3.51732  | 3.49337  | 0.03621  |
| C  | -4.10025 | 3.98139  | 0.80210  | -3.62965 | -4.35548 | 1.14055  | 3.65745  | 4.34040  | 1.14926  |
| C  | -2.64589 | 5.06342  | -0.81090 | -4.38709 | -3.63421 | -1.04743 | 4.38337  | 3.65345  | -1.05877 |
| C  | -4.92645 | 5.10491  | 0.80771  | -4.62946 | -5.32912 | 1.16334  | 4.65203  | 5.31966  | 1.16957  |
| H  | -4.32987 | 3.13332  | 1.43969  | -2.95580 | -4.24562 | 1.98503  | 2.99581  | 4.21811  | 2.00191  |
| C  | -3.48672 | 6.17600  | -0.81957 | -5.37286 | -4.62222 | -1.02970 | 5.36880  | 4.64312  | -1.04140 |
| H  | -1.76668 | 5.04024  | -1.44723 | -4.28857 | -2.97690 | -1.90623 | 4.27213  | 3.00980  | -1.92668 |
| C  | -4.62510 | 6.20183  | -0.00671 | -5.49936 | -5.46823 | 0.07690  | 5.50740  | 5.47554  | 0.07342  |
| H  | -5.80323 | 5.12548  | 1.44763  | -4.72894 | -5.97749 | 2.02852  | 4.76005  | 5.95872  | 2.04070  |
| H  | -3.25522 | 7.02104  | -1.46064 | -6.04117 | -4.73040 | -1.87850 | 6.02518  | 4.76402  | -1.89783 |
| H  | -5.27404 | 7.07233  | -0.00789 | -6.27166 | -6.23114 | 0.09280  | 6.27660  | 6.24158  | 0.08835  |
| C  | -3.94910 | -2.94569 | 0.00363  | 3.50189  | -3.49569 | -0.03576 | -3.51684 | 3.49384  | -0.03619 |
| C  | -3.98141 | -4.10023 | -0.80213 | 4.38717  | -3.63413 | 1.04738  | -4.38240 | 3.65441  | 1.05909  |
| C  | -5.06341 | -2.64590 | 0.81092  | 3.62960  | -4.35554 | -1.14051 | -3.65732 | 4.34050  | -1.14948 |
| C  | -5.10493 | -4.92642 | -0.80774 | 5.37294  | -4.62213 | 1.02965  | -5.36771 | 4.64421  | 1.04180  |
| H  | -3.13335 | -4.32983 | -1.43974 | 4.28870  | -2.97676 | 1.90615  | -4.27089 | 3.01105  | 1.92718  |
| C  | -6.17599 | -3.48673 | 0.81959  | 4.62940  | -5.32918 | -1.16330 | -4.65177 | 5.31989  | -1.16971 |
| H  | -5.04022 | -1.76671 | 1.44728  | 2.95569  | -4.24574 | -1.98495 | -2.99605 | 4.21782  | -0.02236 |
| C  | -6.20184 | -4.62509 | 0.00670  | 5.49937  | -5.46822 | -0.07690 | -5.50667 | 5.47627  | -0.07325 |
| H  | -5.12551 | -5.80319 | -1.44768 | 6.04130  | -4.73026 | 1.87842  | -6.02372 | 4.76549  | 1.89846  |
| H  | -7.02103 | -3.25524 | 1.46068  | 4.72884  | -5.97760 | -2.02844 | -4.76007 | 5.95867  | -2.04101 |
| H  | -7.07234 | -5.27402 | 0.00789  | 6.27168  | -6.23112 | -0.09280 | -6.27576 | 6.24242  | -0.08813 |
| Cu | 0.00000  | 0.00000  | 0.00000  | 0.00000  | 0.00000  | 0.00000  | 0.00001  | 0.00001  | -0.00002 |

### H-CuTPP, total charge 0

|   | Singlet  |          |          | Triplet  |          |          | Quintet  |          |          |
|---|----------|----------|----------|----------|----------|----------|----------|----------|----------|
| N | 0.00009  | 2.12723  | -0.11661 | 2.01274  | 0.25096  | -0.03832 | 0.01358  | 2.04177  | -0.05823 |
| N | 1.96667  | -0.00013 | 0.02902  | 0.25084  | -2.01377 | -0.02641 | 2.04974  | -0.01226 | -0.02455 |
| N | -0.00009 | -2.12666 | -0.11399 | -2.01080 | -0.25091 | -0.01944 | -0.01351 | -2.03729 | 0.00571  |

|   |          |          |          |          |          |          |          |          |          |
|---|----------|----------|----------|----------|----------|----------|----------|----------|----------|
| N | -1.96667 | 0.00003  | 0.02903  | -0.24934 | 2.01406  | -0.04456 | -2.04961 | 0.01494  | -0.02462 |
| C | -1.09650 | 2.93230  | -0.19755 | 2.69649  | 1.44653  | -0.04354 | -1.08148 | 2.87904  | -0.00575 |
| C | -0.68230 | 4.31150  | -0.40900 | 4.11983  | 1.19767  | -0.09024 | -0.66543 | 4.23220  | 0.07917  |
| C | 0.68266  | 4.31144  | -0.40905 | 4.28725  | -0.15387 | -0.08839 | 0.72172  | 4.22300  | 0.07843  |
| C | 1.09674  | 2.93221  | -0.19754 | 2.96744  | -0.74173 | -0.05469 | 1.11967  | 2.86443  | -0.00683 |
| C | 2.41434  | 2.46411  | -0.03005 | 2.72395  | -2.12050 | -0.02550 | 2.48091  | 2.42276  | -0.00272 |
| C | 2.78647  | 1.11459  | 0.14773  | 1.44730  | -2.69551 | -0.00164 | 2.88441  | 1.08746  | -0.01403 |
| C | 4.14128  | 0.68218  | 0.39916  | 1.20166  | -4.11940 | 0.02572  | 4.26618  | 0.65374  | -0.03377 |
| C | 4.14144  | -0.68180 | 0.39953  | -0.14965 | -4.28895 | 0.03048  | 4.25803  | -0.70547 | -0.02975 |
| C | 2.78673  | -1.11451 | 0.14825  | -0.74036 | -2.96996 | -0.00857 | 2.87090  | -1.12233 | -0.03360 |
| C | 2.41442  | -2.46402 | -0.02922 | -2.11972 | -2.72594 | -0.03321 | 2.44904  | -2.45208 | -0.03455 |
| C | 1.09666  | -2.93162 | -0.19674 | -2.69249 | -1.44707 | -0.05902 | 1.08163  | -2.87391 | -0.04541 |
| C | 0.68232  | -4.31025 | -0.41044 | -4.11312 | -1.19912 | -0.15495 | 0.66561  | -4.22565 | -0.15309 |
| C | -0.68268 | -4.31018 | -0.41047 | -4.28153 | 0.15229  | -0.15510 | -0.72140 | -4.21645 | -0.15388 |
| C | -1.09690 | -2.93153 | -0.19673 | -2.96521 | 0.74144  | -0.05837 | -1.11956 | -2.85932 | -0.04662 |
| C | -2.41463 | -2.46383 | -0.02921 | -2.72320 | 2.12155  | -0.02509 | -2.48129 | -2.41936 | -0.03665 |
| C | -2.78682 | -1.11428 | 0.14826  | -1.44531 | 2.69604  | 0.00301  | -2.88544 | -1.08414 | -0.03475 |
| C | -4.14150 | -0.68146 | 0.39952  | -1.19706 | 4.11698  | 0.09424  | -4.26691 | -0.64890 | -0.03036 |
| C | -4.14123 | 0.68252  | 0.39916  | 0.15447  | 4.28488  | 0.09698  | -4.25701 | 0.71030  | -0.03282 |
| C | -2.78638 | 1.11481  | 0.14772  | 0.74312  | 2.96796  | 0.00780  | -2.86960 | 1.12560  | -0.01290 |
| C | -2.41414 | 2.46431  | -0.03006 | 2.12299  | 2.72452  | -0.00984 | -2.44842 | 2.45545  | -0.00078 |
| H | -1.34345 | 5.15604  | -0.54138 | 4.88240  | 1.96170  | -0.12204 | -1.31755 | 5.08959  | 0.14787  |
| H | 1.34387  | 5.15591  | -0.54147 | 5.21295  | -0.70990 | -0.11007 | 1.38523  | 5.07167  | 0.14646  |
| H | 4.98434  | 1.33906  | 0.55473  | 1.96801  | -4.88041 | 0.03850  | 5.12281  | 1.31064  | -0.05242 |
| H | 4.98460  | -1.33845 | 0.55548  | -0.70288 | -5.21607 | 0.05612  | 5.10711  | -1.37225 | -0.02701 |
| H | 1.34345  | -5.15453 | -0.54443 | -4.87242 | -1.96354 | -0.22889 | 1.31854  | -5.08072 | -0.24143 |
| H | -1.34388 | -5.15441 | -0.54449 | -5.20531 | 0.70665  | -0.22980 | -1.38550 | -5.06280 | -0.24296 |
| H | -4.98472 | -1.33804 | 0.55547  | -1.96091 | 4.87751  | 0.16058  | -5.12475 | -1.30436 | -0.02825 |
| H | -4.98423 | 1.33947  | 0.55472  | 0.70910  | 5.20903  | 0.16538  | -5.10485 | 1.37855  | -0.05058 |
| C | 3.50526  | -3.48771 | -0.02468 | -3.04214 | -3.90460 | -0.03751 | 3.48753  | -3.52246 | -0.04185 |
| C | 3.58550  | -4.44011 | 1.00365  | -3.80847 | -4.21335 | 1.09697  | 3.64311  | -4.36852 | 1.06876  |
| C | 4.45894  | -3.52254 | -1.05470 | -3.15850 | -4.71818 | -1.17512 | 4.31988  | -3.70900 | -1.15731 |
| C | 4.59878  | -5.40213 | 1.00532  | -4.67078 | -5.31294 | 1.09543  | 4.61832  | -5.36785 | 1.06901  |
| H | 2.85167  | -4.41734 | 1.80400  | -3.72080 | -3.58774 | 1.98062  | 2.99804  | -4.23254 | 1.93166  |
| C | 5.46784  | -4.48867 | -1.05808 | -4.02275 | -5.81625 | -1.17922 | 5.28895  | -4.71554 | -1.16106 |
| H | 4.39977  | -2.79049 | -1.85486 | -2.57025 | -4.48169 | -2.05716 | 4.19696  | -3.06496 | -2.02314 |
| C | 5.54202  | -5.43026 | -0.02658 | -4.78083 | -6.11726 | -0.04326 | 5.44325  | -5.54579 | -0.04681 |
| H | 4.65119  | -6.12766 | 1.81224  | -5.25410 | -5.54137 | 1.98304  | 4.73337  | -6.00729 | 1.93968  |
| H | 6.19387  | -4.50638 | -1.86605 | -4.10491 | -6.43383 | -2.06924 | 5.92058  | -4.85120 | -2.03448 |
| H | 6.32814  | -6.17995 | -0.02734 | -5.45195 | -6.97143 | -0.04548 | 6.19876  | -6.32628 | -0.04805 |
| C | 3.50545  | 3.48757  | -0.02503 | 3.90579  | -3.04069 | -0.01747 | 3.53670  | 3.47595  | 0.02321  |
| C | 3.58672  | 4.43866  | 1.00441  | 4.30477  | -3.67651 | 1.16767  | 4.35855  | 3.63874  | 1.15012  |
| C | 4.45834  | 3.52341  | -1.05573 | 4.63083  | -3.28132 | -1.19406 | 3.72249  | 4.32606  | -1.07955 |
| C | 4.60024  | 5.40043  | 1.00648  | 5.40712  | -4.53561 | 1.17685  | 5.34608  | 4.62687  | 1.17314  |
| H | 2.85349  | 4.41510  | 1.80529  | 3.74726  | -3.49130 | 2.08143  | 4.21323  | 2.99022  | 2.00907  |
| C | 5.46749  | 4.48929  | -1.05870 | 5.73274  | -4.14104 | -1.18667 | 4.71608  | 5.30702  | -1.06048 |
| H | 4.39838  | 2.79233  | -1.85672 | 4.32396  | -2.79282 | -2.11457 | 3.08679  | 4.20759  | -1.95197 |
| C | 5.54269  | 5.42960  | -0.02611 | 6.12397  | -4.77036 | -0.00071 | 5.52975  | 5.46195  | 0.06694  |
| H | 4.65345  | 6.12497  | 1.81424  | 5.70582  | -5.01900 | 2.10282  | 5.96940  | 4.74430  | 2.05511  |
| H | 6.19292  | 4.50779  | -1.86720 | 6.28298  | -4.31976 | -2.10625 | 4.85440  | 5.94983  | -1.92528 |
| H | 6.32900  | 6.17909  | -0.02656 | 6.98055  | -5.43838 | 0.00576  | 6.29960  | 6.22812  | 0.08318  |
| C | -3.50516 | 3.48786  | -0.02503 | 3.04263  | 3.90512  | 0.01651  | -3.49019 | 3.52248  | 0.02672  |
| C | -4.45806 | 3.52377  | -1.05573 | 3.79254  | 4.19993  | 1.16560  | -4.30889 | 3.69529  | 1.15441  |
| C | -3.58633 | 4.43897  | 1.00440  | 3.16896  | 4.73733  | -1.10642 | -3.66561 | 4.37579  | -1.07528 |
| C | -5.46713 | 4.48974  | -1.05869 | 4.64953  | 5.30333  | 1.19214  | -5.28319 | 4.69643  | 1.17899  |
| H | -4.39817 | 2.79268  | -1.85671 | 3.69603  | 3.56070  | 2.03850  | -4.17146 | 3.04427  | 2.01277  |
| C | -4.59977 | 5.40083  | 1.00648  | 4.02793  | 5.83932  | -1.08241 | -4.64607 | 5.36984  | -1.05465 |
| H | -2.85309 | 4.41535  | 1.80527  | 2.59232  | 4.51253  | -1.99913 | -3.03224 | 4.24956  | -1.94830 |
| C | -5.54223 | 5.43007  | -0.02610 | 4.77023  | 6.12585  | 0.06759  | -5.45667 | 5.53471  | 0.07358  |
| H | -6.19257 | 4.50830  | -1.86717 | 5.22007  | 5.52075  | 2.09075  | -5.90417 | 4.82146  | 2.06157  |
| H | -4.65290 | 6.12538  | 1.81423  | 4.11800  | 6.47150  | -1.96137 | -4.77656 | 6.01509  | -1.91885 |
| H | -6.32847 | 6.17963  | -0.02655 | 5.43720  | 6.98305  | 0.08731  | -6.21625 | 6.31104  | 0.09104  |
| C | -3.50555 | -3.48742 | -0.02468 | -3.90502 | 3.03928  | -0.01744 | -3.53399 | -3.47575 | -0.04551 |
| C | -3.58589 | -4.43980 | 1.00366  | -4.73653 | 3.12243  | 1.11030  | -3.70174 | -4.32054 | 1.06430  |
| C | -4.45922 | -3.52218 | -1.05471 | -4.20217 | 3.83175  | -1.13715 | -4.36811 | -3.65006 | -1.16164 |
| C | -4.59925 | -5.40173 | 1.00534  | -5.83959 | 3.98011  | 1.11948  | -4.69042 | -5.30655 | 1.06311  |
| H | -2.85206 | -4.41708 | 1.80402  | -4.50954 | 2.51344  | 1.98061  | -3.05548 | -4.19399 | 1.92774  |
| C | -5.46820 | -4.48823 | -1.05809 | -5.30705 | 4.68716  | -1.13078 | -5.35075 | -4.64334 | -1.16682 |
| H | -4.39997 | -2.79015 | -1.85488 | -3.56377 | 3.76922  | -2.01376 | -4.23597 | -3.00697 | -2.02681 |
| C | -5.54247 | -5.42980 | -0.02658 | -6.12855 | 4.76447  | -0.00168 | -5.51700 | -5.47235 | -0.05336 |

|    |          |          |          |          |         |          |          |          |          |
|----|----------|----------|----------|----------|---------|----------|----------|----------|----------|
| H  | -4.65174 | -6.12725 | 1.81226  | -6.47064 | 4.03667 | 2.00202  | -4.81471 | -5.94505 | 1.93320  |
| H  | -6.19422 | -4.50589 | -1.86607 | -5.52642 | 5.29041 | -2.00729 | -5.98364 | -4.76967 | -2.04073 |
| H  | -6.32866 | -6.17942 | -0.02734 | -6.98676 | 5.43038 | 0.00443  | -6.28305 | -6.24249 | -0.05569 |
| Cu | 0.00000  | -0.00206 | 0.20304  | 0.00125  | 0.00037 | 0.11037  | 0.00006  | 0.00268  | 0.08085  |
| H  | 0.00001  | 0.01560  | 1.65427  | 0.01465  | 0.01600 | 1.89510  | 0.00035  | 0.04221  | 1.90001  |

### FeTPP, total charge 0

|   | Singlet  |          |          | Triplet  |          |          | Quintet  |          |          |
|---|----------|----------|----------|----------|----------|----------|----------|----------|----------|
| N | -2.00584 | 0.10927  | 0.01123  | 2.00627  | 0.00002  | -0.01137 | 2.05484  | 0.00198  | -0.03612 |
| N | 0.10928  | 2.00586  | -0.01131 | 0.00002  | -2.00658 | 0.00000  | 0.00203  | -2.07964 | -0.00001 |
| N | 2.00585  | -0.10928 | 0.01117  | -2.00626 | -0.00001 | 0.01138  | -2.05484 | -0.00198 | 0.03612  |
| N | -0.10929 | -2.00586 | -0.01140 | -0.00002 | 2.00659  | 0.00000  | -0.00203 | 2.07964  | 0.00001  |
| C | -2.89846 | -0.94458 | 0.06089  | 2.84217  | 1.10058  | 0.01500  | 2.87077  | 1.11470  | 0.00711  |
| C | -4.24981 | -0.44985 | 0.17939  | 4.22067  | 0.68098  | 0.07042  | 4.24777  | 0.68760  | 0.08603  |
| C | -4.17585 | 0.90891  | 0.17866  | 4.22068  | -0.68089 | 0.07051  | 4.24910  | -0.67937 | 0.08603  |
| C | -2.77875 | 1.25387  | 0.06012  | 2.84219  | -1.10053 | 0.01513  | 2.87294  | -1.10915 | 0.00710  |
| C | -2.30285 | 2.56819  | -0.00068 | 2.43972  | -2.43980 | 0.01440  | 2.44894  | -2.45561 | 0.00923  |
| C | -0.94457 | 2.89847  | -0.06095 | 1.10065  | -2.84290 | 0.00629  | 1.11037  | -2.89376 | 0.00434  |
| C | -0.44984 | 4.24984  | -0.17934 | 0.68098  | -4.22241 | -0.00117 | 0.68561  | -4.28136 | -0.00259 |
| C | 0.90892  | 4.17588  | -0.17855 | -0.68091 | -4.22242 | 0.00108  | -0.67731 | -4.28267 | 0.00260  |
| C | 1.25387  | 2.77877  | -0.06009 | -1.10061 | -2.84291 | -0.00632 | -1.10475 | -2.89589 | -0.00435 |
| C | 2.56819  | 2.30286  | 0.00067  | -2.43968 | -2.43984 | -0.01440 | -2.44416 | -2.46033 | -0.00925 |
| C | 2.89846  | 0.94457  | 0.06086  | -2.84217 | -1.10057 | -0.01509 | -2.87077 | -1.11470 | -0.00711 |
| C | 4.24982  | 0.44984  | 0.17930  | -4.22067 | -0.68096 | -0.07041 | -4.24777 | -0.68760 | -0.08603 |
| C | 4.17586  | -0.90893 | 0.17853  | -4.22068 | 0.68091  | -0.07032 | -4.24910 | 0.67937  | -0.08603 |
| C | 2.77875  | -1.25388 | 0.06001  | -2.84219 | 1.10054  | -0.01497 | -2.87294 | 1.10915  | -0.00710 |
| C | 2.30285  | -2.56820 | -0.00081 | -2.43972 | 2.43981  | -0.01417 | -2.44894 | 2.45561  | -0.00923 |
| C | 0.94457  | -2.89846 | -0.06109 | -1.10066 | 2.84291  | -0.00619 | -1.11037 | 2.89376  | -0.00434 |
| C | 0.44984  | -4.24982 | -0.17955 | -0.68098 | 4.22242  | 0.00117  | -0.68561 | 4.28136  | 0.00260  |
| C | -0.90893 | -4.17587 | -0.17874 | 0.68091  | 4.22243  | -0.00126 | 0.67731  | 4.28267  | -0.00260 |
| C | -1.25387 | -2.77877 | -0.06020 | 1.10061  | 2.84292  | 0.00616  | 1.10475  | 2.89589  | 0.00435  |
| C | -2.56819 | -2.30286 | 0.00061  | 2.43968  | 2.43985  | 0.01417  | 2.44416  | 2.46033  | 0.00925  |
| H | -5.13115 | -1.06830 | 0.26263  | 5.06966  | 1.34677  | 0.11737  | 5.10164  | 1.34592  | 0.15165  |
| H | -4.98484 | 1.61949  | 0.26118  | 5.06968  | -1.34666 | 0.11754  | 5.10425  | -1.33603 | 0.15165  |
| H | -1.06830 | 5.13118  | -0.26249 | 1.34647  | -5.07288 | -0.00647 | 1.34607  | -5.13605 | -0.01119 |
| H | 1.61951  | 4.98488  | -0.26097 | -1.34639 | -5.07290 | 0.00634  | -1.33613 | -5.13863 | 0.01122  |
| H | 5.13116  | 1.06829  | 0.26251  | -5.06967 | -1.34675 | -0.11741 | -5.10164 | -1.34592 | -0.15165 |
| H | 4.98487  | -1.61950 | 0.26098  | -5.06969 | 1.34669  | -0.11724 | -5.10425 | 1.33603  | -0.15165 |
| H | 1.06831  | -5.13115 | -0.26277 | -1.34647 | 5.07289  | 0.00651  | -1.34607 | 5.13605  | 0.01119  |
| H | -1.61952 | -4.98486 | -0.26119 | 1.34639  | 5.07291  | -0.00664 | 1.33613  | 5.13863  | -0.01122 |
| C | 3.68224  | 3.30178  | 0.00160  | -3.49925 | -3.49703 | -0.02838 | -3.50902 | -3.51326 | -0.02920 |
| C | 3.90224  | 4.12623  | 1.11605  | -4.26162 | -3.75785 | 1.12050  | -4.31761 | -3.73313 | 1.09694  |
| C | 4.52698  | 3.43172  | -1.11177 | -3.74933 | -4.24292 | -1.19041 | -3.71864 | -4.29792 | -1.17406 |
| C | 4.94357  | 5.05804  | 1.11877  | -5.25177 | -4.74402 | 1.10900  | -5.31126 | -4.71549 | 1.08033  |
| H | 3.25331  | 4.02895  | 1.98171  | -4.07091 | -3.18442 | 2.02319  | -4.15930 | -3.13074 | 1.98690  |
| C | 5.56686  | 4.36515  | -1.11226 | -4.74031 | -5.22819 | -1.20423 | -4.71326 | -5.27923 | -1.19341 |
| H | 4.36066  | 2.79792  | -1.97811 | -3.16411 | -4.04291 | -2.08345 | -3.09871 | -4.13058 | -2.05019 |
| C | 5.77869  | 5.18078  | 0.00379  | -5.49414 | -5.48184 | -0.05397 | -5.51242 | -5.49140 | -0.06559 |
| H | 5.10304  | 5.68540  | 1.99134  | -5.83119 | -4.93641 | 2.00767  | -5.92549 | -4.87552 | 1.96210  |
| H | 6.20892  | 4.45611  | -1.98397 | -4.92425 | -5.79471 | -2.11284 | -4.86491 | -5.87497 | -2.08922 |
| H | 6.58761  | 5.90583  | 0.00461  | -6.26413 | -6.24803 | -0.06385 | -6.28525 | -6.25465 | -0.07961 |
| C | -3.30180 | 3.68222  | -0.00158 | 3.49931  | -3.49698 | 0.02838  | 3.51585  | -3.50646 | 0.02918  |
| C | -3.43174 | 4.52695  | 1.11181  | 3.74932  | -4.24294 | 1.19038  | 3.72700  | -4.29071 | 1.17405  |
| C | -4.12629 | 3.90221  | -1.11600 | 4.26175  | -3.75771 | -1.12046 | 4.32488  | -3.72474 | -1.09695 |
| C | -4.36519 | 5.56680  | 1.11233  | 4.74031  | -5.22820 | 1.20420  | 4.72356  | -5.27004 | 1.19341  |
| H | -2.79794 | 4.36063  | 1.97815  | 3.16403  | -4.04301 | 2.08339  | 3.10673  | -4.12458 | 2.05017  |
| C | -5.05811 | 4.94352  | -1.11869 | 5.25192  | -4.74387 | -1.10897 | 5.32047  | -4.70514 | -1.08032 |
| H | -4.02906 | 3.25328  | -1.98166 | 4.07110  | -3.18422 | -2.02313 | 4.16540  | -3.12266 | -1.98691 |
| C | -5.18085 | 5.77864  | -0.00370 | 5.49422  | -5.48176 | 0.05397  | 5.52315  | -5.48064 | 0.06560  |
| H | -4.45615 | 6.20884  | 1.98406  | 4.92420  | -5.79477 | 2.11278  | 4.87637  | -5.86548 | 2.08923  |
| H | -5.68550 | 5.10299  | -1.99124 | 5.83141  | -4.93618 | -2.00761 | 5.93503  | -4.86395 | -1.96208 |
| H | -5.90590 | 6.58756  | -0.00450 | 6.26423  | -6.24793 | 0.06385  | 6.29749  | -6.24236 | 0.07964  |
| C | -3.68224 | -3.30179 | 0.00154  | 3.49926  | 3.49703  | 0.02798  | 3.50902  | 3.51326  | 0.02920  |
| C | -3.90224 | -4.12615 | 1.11605  | 3.74938  | 4.24309  | 1.18991  | 3.71864  | 4.29792  | 1.17407  |
| C | -4.52698 | -3.43182 | -1.11183 | 4.26161  | 3.75768  | -1.12094 | 4.31760  | 3.73313  | -1.09694 |
| C | -4.94358 | -5.05794 | 1.11885  | 4.74037  | 5.22835  | 1.20357  | 4.71327  | 5.27922  | 1.19341  |
| H | -3.25330 | -4.02883 | 1.98169  | 3.16417  | 4.04322  | 2.08299  | 3.09871  | 4.13058  | 2.05020  |
| C | -5.56686 | -4.36524 | -1.11223 | 5.25177  | 4.74384  | -1.10961 | 5.31126  | 4.71549  | -1.08033 |
| H | -4.36064 | -2.79813 | -1.97824 | 4.07087  | 3.18412  | -2.02355 | 4.15929  | 3.13075  | -1.98690 |

|    |          |          |          |          |         |          |          |         |          |
|----|----------|----------|----------|----------|---------|----------|----------|---------|----------|
| C  | -5.77872 | -5.18077 | 0.00389  | 5.49418  | 5.48182 | 0.05325  | 5.51242  | 5.49140 | 0.06559  |
| H  | -5.10306 | -5.68524 | 1.99147  | 4.92434  | 5.79499 | 2.11209  | 4.86491  | 5.87496 | 2.08923  |
| H  | -6.20891 | -4.45627 | -1.98394 | 5.83118  | 4.93609 | -2.00832 | 5.92548  | 4.87553 | -1.96210 |
| H  | -6.58766 | -5.90579 | 0.00478  | 6.26418  | 6.24800 | 0.06300  | 6.28525  | 6.25465 | 0.07961  |
| C  | 3.30179  | -3.68223 | -0.00163 | -3.49931 | 3.49698 | -0.02798 | -3.51585 | 3.50646 | -0.02919 |
| C  | 3.43164  | -4.52690 | 1.11182  | -4.26159 | 3.75768 | 1.12098  | -4.32488 | 3.72474 | 1.09695  |
| C  | 4.12637  | -3.90227 | -1.11597 | -3.74952 | 4.24295 | -1.18994 | -3.72700 | 4.29071 | -1.17405 |
| C  | 4.36511  | -5.56674 | 1.11247  | -5.25177 | 4.74383 | 1.10964  | -5.32048 | 4.70513 | 1.08032  |
| H  | 2.79778  | -4.36054 | 1.97810  | -4.07079 | 3.18419 | 2.02361  | -4.16540 | 3.12266 | 1.98691  |
| C  | 5.05822  | -4.94356 | -1.11852 | -4.74053 | 5.22820 | -1.20360 | -4.72356 | 5.27004 | -1.19341 |
| H  | 4.02918  | -3.25337 | -1.98166 | -3.16437 | 4.04303 | -2.08305 | -3.10673 | 4.12459 | -2.05017 |
| C  | 5.18087  | -5.77861 | -0.00348 | -5.49426 | 5.48173 | -0.05325 | -5.52315 | 5.48064 | -0.06560 |
| H  | 4.45600  | -6.20873 | 1.98424  | -5.83112 | 4.93613 | 2.00838  | -5.93503 | 4.86395 | 1.96208  |
| H  | 5.68569  | -5.10306 | -1.99101 | -4.92456 | 5.79478 | -2.11214 | -4.87637 | 5.86548 | -2.08923 |
| H  | 5.90594  | -6.58752 | -0.00417 | -6.26428 | 6.24790 | -0.06300 | -6.29749 | 6.24236 | -0.07964 |
| Fe | 0.00000  | 0.00000  | -0.00006 | 0.00000  | 0.00000 | 0.00000  | 0.00000  | 0.00000 | 0.00000  |

### FeTPP, total charge 1

|   | Doublet  |          | Quartet  |          |          | Sextet   |          |          |          |
|---|----------|----------|----------|----------|----------|----------|----------|----------|----------|
| N | 2.01257  | 0.00001  | -0.03666 | 1.97516  | -0.00004 | -0.00616 | 2.07221  | 0.00001  | -0.07635 |
| N | 0.00000  | -2.01327 | -0.00003 | 0.00000  | -1.97557 | -0.00015 | 0.00001  | -2.07283 | 0.00000  |
| N | -2.01256 | 0.00001  | 0.03670  | -1.97516 | -0.00004 | 0.00645  | -2.07221 | -0.00001 | 0.07634  |
| N | 0.00000  | 2.01330  | -0.00003 | 0.00000  | 1.97544  | -0.00015 | -0.00001 | 2.07283  | 0.00000  |
| C | 2.84999  | 1.09620  | 0.01125  | 2.82760  | 1.10703  | 0.01962  | 2.88873  | 1.10458  | -0.00386 |
| C | 4.22243  | 0.68209  | 0.11119  | 4.19189  | 0.68223  | 0.07281  | 4.26133  | 0.68375  | 0.12782  |
| C | 4.22243  | -0.68203 | 0.11141  | 4.19190  | -0.68243 | 0.07147  | 4.26133  | -0.68372 | 0.12782  |
| C | 2.84999  | -1.09618 | 0.01156  | 2.82760  | -1.10714 | 0.01773  | 2.88874  | -1.10456 | -0.00386 |
| C | 2.44374  | -2.44413 | 0.01584  | 2.44438  | -2.44458 | 0.01241  | 2.45584  | -2.45655 | 0.00512  |
| C | 1.09639  | -2.85205 | 0.00808  | 1.10716  | -2.82837 | 0.00270  | 1.10493  | -2.89209 | 0.00286  |
| C | 0.68202  | -4.22787 | -0.00558 | 0.68231  | -4.19366 | -0.00476 | 0.68369  | -4.27071 | -0.00837 |
| C | -0.68202 | -4.22787 | 0.00525  | -0.68231 | -4.19366 | 0.00345  | -0.68366 | -4.27072 | 0.00835  |
| C | -1.09639 | -2.85205 | -0.00823 | -1.10715 | -2.82837 | -0.00328 | -1.10491 | -2.89210 | -0.00287 |
| C | -2.44373 | -2.44412 | -0.01584 | -2.44438 | -2.44457 | -0.01242 | -2.45582 | -2.45656 | -0.00513 |
| C | -2.84999 | -1.09618 | -0.01142 | -2.82760 | -1.10714 | -0.01715 | -2.88873 | -1.10458 | 0.00387  |
| C | -4.22244 | -0.68203 | -0.11108 | -4.19194 | -0.68244 | -0.07017 | -4.26133 | -0.68375 | -0.12780 |
| C | -4.22244 | 0.68209  | -0.11086 | -4.19193 | 0.68222  | -0.07151 | -4.26133 | 0.68372  | -0.12780 |
| C | -2.84999 | 1.09620  | -0.01111 | -2.82761 | 1.10702  | -0.01905 | -2.88874 | 1.10456  | 0.00387  |
| C | -2.44374 | 2.44415  | -0.01529 | -2.44437 | 2.44445  | -0.01576 | -2.45584 | 2.45654  | -0.00513 |
| C | -1.09639 | 2.85208  | -0.00792 | -1.10715 | 2.82824  | -0.00518 | -1.10494 | 2.89209  | -0.00287 |
| C | -0.68202 | 4.22790  | 0.00546  | -0.68233 | 4.19353  | 0.00212  | -0.68369 | 4.27071  | 0.00835  |
| C | 0.68202  | 4.22790  | -0.00580 | 0.68231  | 4.19353  | -0.00342 | 0.68366  | 4.27072  | -0.00836 |
| C | 1.09639  | 2.85208  | 0.00777  | 1.10715  | 2.82824  | 0.00460  | 1.10491  | 2.89210  | 0.00286  |
| C | 2.44374  | 2.44416  | 0.01529  | 2.44437  | 2.44446  | 0.01576  | 2.45582  | 2.45656  | 0.00512  |
| H | 5.07007  | 1.34393  | 0.19965  | 5.03908  | 1.34998  | 0.11765  | 5.11137  | 1.33939  | 0.23980  |
| H | 5.07007  | -1.34384 | 0.20008  | 5.03909  | -1.35027 | 0.11502  | 5.11139  | -1.33935 | 0.23980  |
| H | 1.34312  | -5.08038 | -0.02307 | 1.34983  | -5.04215 | -0.01248 | 1.33816  | -5.12854 | -0.03052 |
| H | -1.34312 | -5.08039 | 0.02262  | -1.34984 | -5.04215 | 0.01076  | -1.33812 | -5.12855 | 0.03050  |
| H | -5.07010 | -1.34384 | -0.19964 | -5.03914 | -1.35029 | -0.11330 | -5.11138 | -1.33939 | -0.23977 |
| H | -5.07010 | 1.34392  | -0.19921 | -5.03914 | 1.34998  | -0.11593 | -5.11139 | 1.33935  | -0.23977 |
| H | -1.34311 | 5.08042  | 0.02305  | -1.34988 | 5.04201  | 0.00814  | -1.33816 | 5.12854  | 0.03050  |
| H | 1.34310  | 5.08042  | -0.02350 | 1.34986  | 5.04201  | -0.00986 | 1.33812  | 5.12855  | -0.03052 |
| C | -3.49946 | -3.49366 | -0.03665 | -3.50315 | -3.50097 | -0.02303 | -3.51286 | -3.50456 | -0.03329 |
| C | -4.37792 | -3.63687 | 1.05126  | -4.24023 | -3.77546 | 1.13869  | -4.41913 | -3.62586 | 1.03507  |
| C | -3.63314 | -4.34878 | -1.14421 | -3.77044 | -4.22517 | -1.19453 | -3.62312 | -4.38046 | -1.12783 |
| C | -5.36349 | -4.62518 | 1.03518  | -5.22883 | -4.76288 | 1.12899  | -5.40631 | -4.61214 | 1.01373  |
| H | -4.27450 | -2.98301 | 1.91215  | -4.03338 | -3.21897 | 2.04858  | -4.33453 | -2.95698 | 1.88635  |
| C | -4.63255 | -5.32295 | -1.16499 | -4.76264 | -5.20894 | -1.20374 | -4.62471 | -5.35192 | -1.15508 |
| H | -2.96414 | -4.23515 | -1.99207 | -3.20485 | -4.01182 | -2.09727 | -2.93503 | -4.28323 | -1.96224 |
| C | -5.49604 | -5.46678 | -0.07406 | -5.49230 | -5.48014 | -0.04208 | -5.51454 | -5.47382 | -0.08273 |
| H | -6.02685 | -4.73706 | 1.88739  | -5.79044 | -4.97158 | 2.03458  | -6.09001 | -4.70698 | 1.85181  |
| H | -4.73670 | -5.96800 | -2.03210 | -4.96562 | -5.76050 | -2.11676 | -4.71049 | -6.01185 | -2.01296 |
| H | -6.26808 | -6.22997 | -0.08853 | -6.26189 | -6.24596 | -0.04946 | -6.28819 | -6.23528 | -0.10183 |
| C | 3.49946  | -3.49366 | 0.03665  | 3.50316  | -3.50097 | 0.02303  | 3.51289  | -3.50453 | 0.03329  |
| C | 3.63299  | -4.34893 | 1.14411  | 3.76967  | -4.22597 | 1.19421  | 3.62314  | -4.38044 | 1.12782  |
| C | 4.37808  | -3.63672 | -1.05116 | 4.24103  | -3.77466 | -1.13837 | 4.41917  | -3.62582 | -1.03507 |
| C | 4.63240  | -5.32310 | 1.16489  | 4.76187  | -5.20972 | 1.20343  | 4.62474  | -5.35190 | 1.15507  |
| H | 2.96388  | -4.23542 | 1.99190  | 3.20346  | -4.01324 | 2.09672  | 2.93505  | -4.28322 | 1.96223  |
| C | 5.36365  | -4.62503 | -1.03508 | 5.22964  | -4.76209 | -1.12868 | 5.40636  | -4.61209 | -1.01372 |
| H | 4.27477  | -2.98274 | -1.91197 | 4.03479  | -3.21756 | -2.04802 | 4.33457  | -2.95693 | -1.88634 |
| C | 5.49604  | -5.46678 | 0.07407  | 5.49232  | -5.48013 | 0.04209  | 5.51458  | -5.47378 | 0.08273  |

|    |          |          |          |          |          |          |          |          |          |
|----|----------|----------|----------|----------|----------|----------|----------|----------|----------|
| H  | 4.73644  | -5.96827 | 2.03193  | 4.96424  | -5.76190 | 2.11623  | 4.71051  | -6.01183 | 2.01294  |
| H  | 6.02712  | -4.73679 | -1.88721 | 5.79185  | -4.97016 | -2.03403 | 6.09006  | -4.70691 | -1.85180 |
| H  | 6.26808  | -6.22997 | 0.08853  | 6.26191  | -6.24595 | 0.04946  | 6.28824  | -6.23524 | 0.10183  |
| C  | 3.49949  | 3.49367  | 0.03566  | 3.50303  | 3.50094  | 0.02880  | 3.51286  | 3.50456  | 0.03329  |
| C  | 3.63331  | 4.34915  | 1.14292  | 3.76795  | 4.22468  | 1.20112  | 3.62311  | 4.38047  | 1.12782  |
| C  | 4.37787  | 3.63647  | -1.05237 | 4.24227  | 3.77609  | -1.13139 | 4.41914  | 3.62585  | -1.03506 |
| C  | 4.63277  | 5.32329  | 1.16328  | 4.75996  | 5.20860  | 1.21268  | 4.62470  | 5.35193  | 1.15508  |
| H  | 2.96440  | 4.23584  | 1.99089  | 3.20064  | 4.01085  | 2.10269  | 2.93502  | 4.28324  | 1.96223  |
| C  | 5.36348  | 4.62474  | -1.03672 | 5.23068  | 4.76368  | -1.11936 | 5.40632  | 4.61213  | -1.01372 |
| H  | 4.27434  | 2.98231  | -1.91302 | 4.03722  | 3.22000  | -2.04193 | 4.33454  | 2.95697  | -1.88634 |
| C  | 5.49616  | 5.46671  | 0.07223  | 5.49180  | 5.48044  | 0.05254  | 5.51454  | 5.47382  | 0.08273  |
| H  | 4.73703  | 5.96862  | 2.03016  | 4.96110  | 5.75979  | 2.12634  | 4.71047  | 6.01186  | 2.01295  |
| H  | 6.02677  | 4.73630  | -1.88902 | 5.79396  | 4.97289  | -2.02379 | 6.09002  | 4.70696  | -1.85180 |
| H  | 6.26824  | 6.22987  | 0.08636  | 6.26125  | 6.24639  | 0.06173  | 6.28819  | 6.23528  | 0.10183  |
| C  | -3.49949 | 3.49367  | -0.03566 | -3.50304 | 3.50093  | -0.02880 | -3.51289 | 3.50453  | -0.03329 |
| C  | -4.37772 | 3.63662  | 1.05247  | -4.24148 | 3.77687  | 1.13170  | -4.41916 | 3.62583  | 1.03507  |
| C  | -3.63346 | 4.34900  | -1.14302 | -3.76874 | 4.22387  | -1.20144 | -3.62315 | 4.38043  | -1.12783 |
| C  | -5.36333 | 4.62488  | 1.03682  | -5.22989 | 4.76446  | 1.11967  | -5.40635 | 4.61211  | 1.01372  |
| H  | -4.27408 | 2.98257  | 1.91320  | -4.03582 | 3.22140  | 2.04248  | -4.33455 | 2.95696  | 1.88635  |
| C  | -4.63292 | 5.32313  | -1.16337 | -4.76075 | 5.20780  | -1.21298 | -4.62475 | 5.35188  | -1.15509 |
| H  | -2.96466 | 4.23556  | -1.99106 | -3.20205 | 4.00943  | -2.10324 | -2.93507 | 4.28320  | -1.96225 |
| C  | -5.49616 | 5.46671  | -0.07222 | -5.49180 | 5.48043  | -0.05254 | -5.51458 | 5.47378  | -0.08273 |
| H  | -6.02651 | 4.73656  | 1.88920  | -5.79256 | 4.97428  | 2.02434  | -6.09004 | 4.70693  | 1.85181  |
| H  | -4.73730 | 5.96835  | -2.03033 | -4.96250 | 5.75838  | -2.12688 | -4.71053 | 6.01181  | -2.01296 |
| H  | -6.26824 | 6.22987  | -0.08635 | -6.26124 | 6.24638  | -0.06172 | -6.28824 | 6.23524  | -0.10183 |
| Fe | 0.00000  | 0.00001  | 0.00000  | 0.00000  | -0.00005 | 0.00000  | 0.00000  | 0.00000  | 0.00002  |

### FeTPP, total charge -1

|   | Doublet  |          | Quartet  |          |          | Sextet   |          |          |          |
|---|----------|----------|----------|----------|----------|----------|----------|----------|----------|
| N | -2.00173 | 0.00000  | -0.02356 | 0.00015  | -2.02150 | 0.00001  | -0.00125 | 2.08044  | -0.03550 |
| N | 0.00001  | 2.02466  | 0.00004  | -2.01774 | -0.00014 | -0.04236 | 2.07553  | 0.00124  | 0.00001  |
| N | 2.00174  | -0.00001 | 0.02351  | -0.00015 | 2.02153  | 0.00002  | 0.00125  | -2.08044 | 0.03550  |
| N | 0.00000  | -2.02467 | 0.00004  | 2.01774  | 0.00015  | 0.04236  | -2.07553 | -0.00124 | -0.00001 |
| C | -2.84374 | -1.10804 | 0.00213  | 1.10405  | -2.86113 | -0.00178 | -1.11360 | 2.89828  | 0.02375  |
| C | -4.22807 | -0.67799 | 0.06340  | 0.69123  | -4.22356 | 0.00544  | -0.69537 | 4.25918  | 0.12996  |
| C | -4.22806 | 0.67800  | 0.06345  | -0.69063 | -4.22366 | -0.00524 | 0.69027  | 4.26001  | 0.12996  |
| C | -2.84374 | 1.10805  | 0.00219  | -1.10364 | -2.86128 | 0.00186  | 1.11013  | 2.89961  | 0.02375  |
| C | -2.45419 | 2.43738  | 0.00922  | -2.45832 | -2.43846 | 0.00223  | 2.46978  | 2.45153  | 0.01897  |
| C | -1.10216 | 2.86352  | 0.00586  | -2.85314 | -1.10824 | -0.00997 | 2.89155  | 1.11881  | 0.01192  |
| C | -0.69044 | 4.22693  | -0.00204 | -4.23584 | -0.67929 | 0.05685  | 4.27867  | 0.68327  | 0.00027  |
| C | 0.69046  | 4.22692  | 0.00255  | -4.23593 | 0.67872  | 0.05664  | 4.27948  | -0.67815 | -0.00022 |
| C | 1.10218  | 2.86352  | -0.00564 | -2.85329 | 1.10785  | -0.01027 | 2.89289  | -1.11534 | -0.01190 |
| C | 2.45421  | 2.43737  | -0.00920 | -2.45867 | 2.43814  | 0.00171  | 2.47272  | -2.44857 | -0.01896 |
| C | 2.84374  | 1.10804  | -0.00236 | -1.10405 | 2.86115  | 0.00156  | 1.11360  | -2.89828 | -0.02376 |
| C | 4.22806  | 0.67798  | -0.06388 | -0.69123 | 4.22359  | -0.00546 | 0.69537  | -4.25918 | -0.12998 |
| C | 4.22805  | -0.67801 | -0.06384 | 0.69063  | 4.22368  | 0.00563  | -0.69027 | 4.26001  | -0.12998 |
| C | 2.84374  | -1.10806 | -0.00229 | 1.10364  | 2.86131  | -0.00148 | -1.11013 | -2.89961 | -0.02376 |
| C | 2.45420  | 2.43739  | -0.00909 | -2.45832 | 2.43848  | -0.00170 | -2.46978 | -2.45153 | -0.01897 |
| C | 1.10216  | -2.86353 | -0.00557 | 2.85313  | 1.10826  | 0.01022  | -2.89155 | -1.11881 | -0.01192 |
| C | 0.69043  | -4.22693 | 0.00259  | 4.23583  | 0.67933  | -0.05679 | -4.27867 | -0.68327 | -0.00025 |
| C | -0.69046 | -4.22693 | -0.00208 | 4.23593  | -0.67868 | -0.05700 | -4.27948 | 0.67815  | 0.00024  |
| C | -1.10218 | -2.86352 | 0.00580  | -2.85330 | -1.10783 | 0.00992  | -2.89289 | 1.11534  | 0.01190  |
| C | -2.45421 | -2.43737 | 0.00911  | 2.45868  | -2.43812 | -0.00222 | -2.47272 | 2.44857  | 0.01896  |
| H | -5.07967 | -1.34070 | 0.11973  | 1.35071  | -5.07894 | 0.02001  | -1.34953 | 5.11498  | 0.21654  |
| H | -5.07967 | 1.34071  | 0.11982  | -1.34999 | -5.07913 | -0.01973 | 1.34340  | 5.11659  | 0.21654  |
| H | -1.35083 | 5.08183  | -0.01223 | -5.08773 | -1.34110 | 0.11872  | 5.13829  | 1.33825  | -0.00792 |
| H | 1.35086  | 5.08182  | 0.01292  | -5.08792 | 1.34043  | 0.11831  | 5.13989  | -1.33210 | 0.00798  |
| H | 5.07965  | 1.34068  | -0.12041 | -1.35070 | 5.07897  | -0.02015 | 1.34953  | -5.11498 | -0.21657 |
| H | 5.07965  | -1.34072 | -0.12032 | 1.34998  | 5.07916  | 0.02037  | -1.34340 | -5.11659 | -0.21657 |
| H | 1.35083  | -5.08183 | 0.01300  | 5.08772  | 1.34116  | -0.11851 | -5.13829 | -1.33825 | 0.00794  |
| H | -1.35086 | -5.08183 | -0.01232 | 5.08792  | -1.34036 | -0.11893 | -5.13989 | 1.33210  | -0.00796 |
| C | 3.51259  | 3.49204  | -0.03014 | -3.51451 | 3.49421  | 0.02835  | 3.52507  | -3.50942 | -0.03617 |
| C | 4.33512  | 3.71379  | 1.08692  | -3.69744 | 4.30336  | 1.16331  | 3.69055  | -4.37685 | 1.05815  |
| C | 3.71178  | 4.29081  | -1.16915 | -4.35395 | 3.70728  | -1.07826 | 4.37268  | -3.67647 | -1.14496 |
| C | 5.33213  | 4.69389  | 1.06503  | -4.69064 | 5.28521  | 1.19593  | 4.67496  | -5.36785 | 1.05088  |
| H | 4.18413  | 3.10528  | 1.97399  | -3.05071 | 4.14928  | 2.02221  | 3.03628  | -4.26119 | 1.91735  |
| C | 4.70497  | 5.27320  | -1.19505 | -5.35156 | 4.68673  | -1.04932 | 5.36147  | -4.66498 | -1.15575 |
| H | 3.07766  | 4.12925  | -2.03605 | -4.21551 | 3.09243  | -1.96299 | 4.24617  | -3.01987 | -2.00094 |
| C | 5.52143  | 5.47866  | -0.07691 | -5.52444 | 5.48087  | 0.08856  | 5.51762  | -5.51594 | -0.05715 |
| H | 5.95748  | 4.84662  | 1.94137  | -4.81749 | 5.89428  | 2.08772  | 4.78757  | -6.02197 | 1.91217  |

|    |          |          |          |          |          |          |          |          |          |
|----|----------|----------|----------|----------|----------|----------|----------|----------|----------|
| H  | 4.84461  | 5.87532  | -2.08962 | -5.98983 | 4.83185  | -1.91763 | 6.00514  | -4.77359 | -2.02540 |
| H  | 6.29527  | 6.24196  | -0.09589 | -6.29854 | 6.24375  | 0.11291  | 6.28470  | -6.28622 | -0.06406 |
| C  | -3.51257 | 3.49206  | 0.03013  | -3.51398 | -3.49470 | 0.02926  | 3.52087  | 3.51363  | 0.03618  |
| C  | -3.71202 | 4.29058  | 1.16927  | -3.69657 | -4.30365 | 1.16441  | 4.36827  | 3.68170  | 1.14497  |
| C  | -4.33483 | 3.71405  | -1.08707 | -4.35356 | -3.70816 | -1.07717 | 3.68532  | 4.38125  | -1.05816 |
| C  | -4.70521 | 5.27297  | 1.19515  | -4.68958 | -5.28568 | 1.19740  | 5.35588  | 4.67139  | 1.15574  |
| H  | -3.07810 | 4.12882  | 2.03628  | -3.04972 | -4.14928 | 2.02317  | 4.24254  | 3.02497  | 2.00095  |
| C  | -5.33184 | 4.69416  | -1.06521 | -5.35098 | -4.80378 | -1.04787 | 4.66855  | 5.37342  | -1.05090 |
| H  | -4.18364 | 3.10573  | -1.97424 | -4.21537 | -3.09346 | -1.96205 | 3.03118  | 4.26480  | -1.91736 |
| C  | -5.52140 | 5.47868  | 0.07686  | -5.52353 | -5.48172 | 0.09021  | 5.51103  | 5.52252  | 0.05714  |
| H  | -4.84506 | 5.87491  | 2.08981  | -4.81617 | -5.89459 | 2.08933  | 5.99942  | 4.78078  | 2.02540  |
| H  | -5.95698 | 4.84707  | -1.94166 | -5.98936 | -4.83320 | -1.91604 | 4.78038  | 6.02766  | -1.91220 |
| H  | -6.29524 | 6.24198  | 0.09581  | -6.29749 | -6.24474 | 0.11484  | 6.27719  | 6.29371  | 0.06404  |
| C  | -3.51259 | -3.49204 | 0.02994  | 3.51449  | -3.49421 | -0.02926 | -3.52507 | 3.50942  | 0.03617  |
| C  | -3.71210 | -4.29060 | 1.16904  | 4.35423  | -3.70741 | 1.07710  | -4.37266 | 3.67648  | 1.14497  |
| C  | -4.33481 | -3.71397 | -1.08731 | 3.69706  | -4.30326 | -1.16434 | -3.69057 | 4.37684  | -1.05816 |
| C  | -4.70530 | -5.27298 | 1.19484  | 5.35180  | -4.68689 | 1.04778  | -5.36145 | 4.66499  | 1.15576  |
| H  | -3.07822 | -4.12888 | 2.03609  | 4.21606  | -3.09264 | 1.96193  | -4.24614 | 3.01989  | 2.00095  |
| C  | -5.33184 | -4.69407 | -1.06552 | 4.69021  | -5.28514 | -1.19734 | -4.67498 | 5.36784  | -1.05088 |
| H  | -4.18357 | -3.10562 | -1.97444 | 3.05008  | -4.14908 | -2.02304 | -3.03631 | 4.26117  | -1.91737 |
| C  | -5.52145 | -5.47863 | 0.07651  | 5.52433  | -5.48093 | -0.09023 | -5.51762 | 5.51593  | 0.05716  |
| H  | -4.84520 | -5.87495 | 2.08948  | 5.99031  | -4.83212 | 1.91589  | -6.00511 | 4.77361  | 2.02543  |
| H  | -5.95694 | -4.84695 | -1.94201 | 4.81678  | -5.89413 | -2.08922 | -4.78760 | 6.02195  | -1.91218 |
| H  | -6.29530 | -6.24193 | 0.09540  | 6.29839  | -6.24384 | -0.11487 | -6.28470 | 6.28621  | 0.06407  |
| C  | 3.51258  | -3.49206 | -0.02994 | 3.51400  | 3.49472  | -0.02836 | -3.52087 | -3.51363 | -0.03618 |
| C  | 4.33506  | -3.71376 | 1.08715  | 3.69675  | 4.30393  | -1.16330 | -3.68530 | -4.38126 | 1.05815  |
| C  | 3.71182  | -4.29087 | -1.16892 | 4.35347  | 3.70786  | 1.07822  | -4.36828 | -3.68169 | -1.14496 |
| C  | 5.33207  | -4.69387 | 1.06534  | 4.68981  | 5.28593  | -1.19593 | -4.66853 | -5.37343 | 1.05089  |
| H  | 4.18403  | -3.10522 | 1.97420  | 3.05000  | 4.14979  | -2.02217 | -3.03116 | -4.26483 | 1.91734  |
| C  | 4.70501  | -5.27326 | -1.19474 | 5.35093  | 4.68746  | 1.04927  | -5.35590 | -4.67138 | -1.15573 |
| H  | 3.07773  | -4.12934 | -2.03585 | 4.21516  | 3.09295  | 1.96293  | -4.24256 | -3.02495 | -2.00094 |
| C  | 5.52142  | -5.47867 | -0.07656 | 5.52364  | 5.48167  | -0.08860 | -5.51103 | -5.52252 | -0.05713 |
| H  | 5.95738  | -4.84656 | 1.94172  | 4.81653  | 5.89505  | -2.08770 | -4.78036 | -6.02768 | 1.91218  |
| H  | 4.84469  | -5.87541 | -2.08929 | 5.98922  | 4.83264  | 1.91755  | -5.99945 | -4.78076 | -2.02538 |
| H  | 6.29527  | -6.24198 | -0.09547 | 6.29763  | 6.24466  | -0.11295 | -6.27719 | -6.29371 | -0.06403 |
| Fe | 0.00000  | 0.00000  | 0.00001  | 0.00000  | 0.00001  | 0.00000  | 0.00000  | 0.00000  | 0.00000  |

### H-FeTPP, total charge 0

|   | Doublet  |          | Quartet  |          |          | Sextet   |          |          |          |
|---|----------|----------|----------|----------|----------|----------|----------|----------|----------|
| N | -1.73013 | 0.99461  | -0.02727 | 2.00758  | -0.00012 | -0.04164 | 2.04757  | -0.00001 | -0.02047 |
| N | 1.00321  | 1.71927  | -0.01877 | 0.00163  | -2.00548 | -0.02970 | 0.00239  | -2.04559 | 0.00740  |
| N | 1.72653  | -0.99984 | -0.02938 | -2.00267 | 0.00013  | -0.01768 | -2.04290 | 0.00001  | 0.03473  |
| N | -1.01169 | -1.72970 | -0.03959 | 0.00186  | 2.00550  | -0.02970 | 0.00242  | 2.04559  | 0.00740  |
| C | -3.00998 | 0.46746  | -0.07316 | 2.84210  | 1.10045  | -0.02168 | 2.87103  | 1.10617  | -0.01264 |
| C | -3.99144 | 1.52053  | -0.00248 | 4.22018  | 0.68072  | 0.01372  | 4.25187  | 0.68209  | 0.00959  |
| C | -3.30676 | 2.69223  | 0.10079  | 4.22010  | -0.68121 | 0.01383  | 4.25186  | -0.68214 | 0.00959  |
| C | -1.90273 | 2.36310  | 0.07379  | 2.84197  | -1.10078 | -0.02152 | 2.87101  | -1.10620 | -0.01265 |
| C | -0.88330 | 3.31624  | 0.12983  | 2.44118  | -2.43930 | -0.01451 | 2.45031  | -2.44719 | -0.01110 |
| C | 0.47411  | 2.99366  | 0.06397  | 1.10262  | -2.83968 | -0.02795 | 1.10918  | -2.86768 | -0.01587 |
| C | 1.52706  | 3.97925  | 0.02915  | 0.68347  | -4.21818 | -0.05171 | 0.68597  | -4.24784 | -0.06895 |
| C | 2.70234  | 3.30095  | -0.07339 | -0.67846 | -4.21876 | -0.05043 | -0.67828 | -4.24897 | -0.06518 |
| C | 2.37437  | 1.89735  | -0.09720 | -1.09874 | -2.84036 | -0.04122 | -1.10338 | -2.86883 | -0.02600 |
| C | 3.32864  | 0.88136  | -0.16219 | -2.43724 | -2.43939 | -0.04215 | -2.44408 | -2.44753 | -0.03225 |
| C | 3.00338  | -0.47595 | -0.11908 | -2.83665 | -1.10046 | -0.04799 | -2.86352 | -1.10613 | -0.02869 |
| C | 3.98153  | -1.53482 | -0.14779 | -4.21353 | -0.68069 | -0.11717 | -4.23992 | -0.68209 | -0.14121 |
| C | 3.29696  | -2.70675 | -0.04583 | -4.21345 | 0.68122  | -0.11706 | -4.23991 | 0.68214  | -0.14121 |
| C | 1.89623  | -2.36980 | 0.03031  | -2.83652 | 1.10081  | -0.04783 | -2.86351 | 1.10617  | -0.02870 |
| C | 0.87721  | -3.32353 | 0.08973  | -2.43695 | 2.43970  | -0.04188 | -2.44405 | 2.44756  | -0.03226 |
| C | -0.48108 | -3.00362 | 0.03360  | -1.09840 | 2.84051  | -0.04107 | -1.10334 | 2.86884  | -0.02600 |
| C | -1.53475 | -3.98944 | 0.00947  | -0.67796 | 4.21885  | -0.05032 | -0.67823 | 4.24897  | -0.06518 |
| C | -2.70975 | -3.31088 | -0.09290 | 0.68397  | 4.21811  | -0.05182 | 0.68602  | 4.24784  | -0.06895 |
| C | -2.38152 | -1.90647 | -0.10157 | 1.10296  | 2.83955  | -0.02811 | 1.10921  | 2.86767  | -0.01586 |
| C | -3.33628 | -0.88804 | -0.13393 | 2.44148  | 2.43902  | -0.01478 | 2.45034  | 2.44717  | -0.01109 |
| H | -5.06087 | 1.37068  | -0.01216 | 5.06915  | 1.34725  | 0.04669  | 5.10539  | 1.34348  | 0.03348  |
| H | -3.70620 | 3.69145  | 0.19157  | 5.06899  | -1.34784 | 0.04691  | 5.10538  | -1.34354 | 0.03348  |
| H | 1.37507  | 5.04770  | 0.07025  | 1.35046  | -5.06730 | -0.06752 | 1.34811  | -5.10018 | -0.10967 |
| H | 3.70329  | 3.70309  | -0.12398 | -1.34451 | -5.06868 | -0.05699 | -1.33881 | -5.10300 | -0.09170 |
| H | 5.04758  | -1.39027 | -0.24143 | -5.06104 | -1.34761 | -0.17336 | -5.08860 | -1.34416 | -0.23084 |
| H | 3.69186  | -3.71199 | -0.04236 | -5.06088 | 1.34825  | -0.17314 | -5.08859 | 1.34422  | -0.23085 |

|    |          |          |          |          |          |          |          |          |          |
|----|----------|----------|----------|----------|----------|----------|----------|----------|----------|
| H  | -1.38446 | -5.05779 | 0.05636  | -1.34391 | 5.06885  | -0.05678 | -1.33875 | 5.10302  | -0.09170 |
| H  | -3.70997 | -3.71359 | -0.15122 | 1.35106  | 5.06715  | -0.06774 | 1.34817  | 5.10016  | -0.10966 |
| C  | 4.77170  | 1.26706  | -0.25737 | -3.49833 | -3.49468 | -0.04659 | -3.50671 | -3.50159 | -0.06808 |
| C  | 5.61853  | 1.14738  | 0.85491  | -4.24723 | -3.75306 | 1.11160  | -4.30220 | -3.74668 | 1.06186  |
| C  | 5.29890  | 1.75831  | -1.46115 | -3.76398 | -4.23871 | -1.20622 | -3.73008 | -4.25616 | -1.23016 |
| C  | 6.96486  | 1.51128  | 0.76595  | -5.24018 | -4.73644 | 1.11115  | -5.29764 | -4.72698 | 1.03194  |
| H  | 5.21391  | 0.77035  | 1.78987  | -4.04329 | -3.18065 | 2.01199  | -4.13253 | -3.16616 | 1.96416  |
| C  | 6.64556  | 2.12088  | -1.55230 | -4.75795 | -5.22109 | -1.20852 | -4.72678 | -5.23504 | -1.26225 |
| H  | 4.64732  | 1.85192  | -2.32531 | -3.18936 | -4.03960 | -2.10636 | -3.12074 | -4.06691 | -2.10930 |
| C  | 7.48220  | 1.99865  | -0.43847 | -5.49843 | -5.47297 | -0.04923 | -5.51293 | -5.47383 | -0.13057 |
| H  | 7.60753  | 1.41599  | 1.63670  | -5.80932 | -4.92768 | 2.01656  | -5.90238 | -4.90772 | 1.91619  |
| H  | 7.04009  | 2.49666  | -2.49222 | -4.95459 | -5.78658 | -2.11508 | -4.89024 | -5.80787 | -2.17080 |
| H  | 8.52879  | 2.28112  | -0.50836 | -6.27064 | -6.23697 | -0.05021 | -6.28730 | -6.23526 | -0.15466 |
| C  | -1.26196 | 4.76019  | 0.23986  | 3.49859  | -3.49811 | 0.00893  | 3.50785  | -3.50694 | -0.01103 |
| C  | -1.08933 | 5.44932  | 1.44981  | 3.74746  | -4.22851 | 1.18095  | 3.73801  | -4.28296 | 1.13553  |
| C  | -1.78958 | 5.44894  | -0.86288 | 4.25725  | -3.77670 | -1.13806 | 4.28518  | -3.74252 | -1.15551 |
| C  | -1.43874 | 6.79831  | 1.55620  | 4.73514  | -5.21683 | 1.20600  | 4.72478  | -5.27238 | 1.13840  |
| H  | -0.68191 | 4.92015  | 2.30656  | 3.16455  | -4.01354 | 2.07198  | 3.14116  | -4.10244 | 2.02497  |
| C  | -2.13759 | 6.79841  | -0.75876 | 5.24402  | -4.76610 | -1.11484 | 5.27067  | -4.73327 | -1.15478 |
| H  | -1.92191 | 4.92064  | -1.80281 | 4.06644  | -3.21543 | -2.04838 | 4.10889  | -3.14694 | -2.04671 |
| C  | -1.96363 | 7.47673  | 0.45177  | 5.48588  | -5.48858 | 0.05782  | 5.49369  | -5.50066 | -0.00717 |
| H  | -1.30232 | 7.31737  | 2.50081  | 4.91891  | -5.77155 | 2.12184  | 4.89376  | -5.86188 | 2.03517  |
| H  | -2.54184 | 7.31895  | -1.62247 | 5.82103  | -4.97294 | -2.01183 | 5.86131  | -4.90638 | -2.05006 |
| H  | -2.23457 | 8.52550  | 0.53358  | 6.25328  | -6.25717 | 0.07676  | 6.26027  | -6.27031 | -0.00565 |
| C  | -4.78319 | -1.26538 | -0.20196 | 3.49903  | 3.49769  | 0.00845  | 3.50789  | 3.50690  | -0.01102 |
| C  | -5.44199 | -1.78199 | 0.92402  | 3.74811  | 4.22818  | 1.18037  | 3.73806  | 4.28292  | 1.13555  |
| C  | -5.50516 | -1.10037 | -1.39349 | 4.25760  | 3.77607  | -1.13865 | 4.28523  | 3.74247  | -1.15550 |
| C  | -6.79452 | -2.12758 | 0.86007  | 4.73593  | 5.21636  | 1.20522  | 4.72484  | 5.27232  | 1.13842  |
| H  | -4.88801 | -1.90749 | 1.84995  | 3.16528  | 4.01337  | 2.07149  | 3.14120  | 4.10240  | 2.02498  |
| C  | -6.85741 | -1.44739 | -1.45967 | 5.24451  | 4.76533  | -1.11563 | 5.27073  | 4.73320  | -1.15477 |
| H  | -4.99948 | -0.70045 | -2.26783 | 4.06662  | 3.21473  | -2.04889 | 4.10893  | 3.14689  | -2.04669 |
| C  | -7.50586 | -1.96176 | -0.33257 | 5.48659  | 5.48790  | 0.05694  | 5.49375  | 5.50060  | -0.00715 |
| H  | -7.29181 | -2.52330 | 1.74122  | 4.91988  | 5.77114  | 2.12099  | 4.89382  | 5.86182  | 2.03519  |
| H  | -7.40242 | -1.31690 | -2.39041 | 5.82146  | 4.97200  | -2.01269 | 5.86138  | 4.90631  | -2.05004 |
| H  | -8.55711 | -2.23075 | -0.38295 | 6.25410  | 6.25638  | 0.07572  | 6.26034  | 6.27023  | -0.00563 |
| C  | 1.26864  | -4.76542 | 0.18339  | -3.49792 | 3.49510  | -0.04610 | -3.50667 | 3.50164  | -0.06809 |
| C  | 1.75474  | -5.29036 | 1.39023  | -4.24667 | 3.75345  | 1.11219  | -4.30217 | 3.74673  | 1.06184  |
| C  | 1.16593  | -5.61139 | -0.93130 | -3.76362 | 4.23927  | -1.20564 | -3.73002 | 4.25620  | -1.23017 |
| C  | 2.12734  | -6.63422 | 1.48241  | -5.23952 | 4.73694  | 1.11194  | -5.29759 | 4.72705  | 1.03192  |
| H  | 1.83653  | -4.63883 | 2.25559  | -4.04270 | 3.18093  | 2.01250  | -4.13250 | 3.16621  | 1.96414  |
| C  | 1.54009  | -6.95485 | -0.84138 | -4.75748 | 5.22175  | -1.20774 | -4.72671 | 5.23510  | -1.26226 |
| H  | 0.79478  | -5.20833 | -1.86931 | -3.18912 | 4.04019  | -2.10586 | -3.12068 | 4.06695  | -2.10931 |
| C  | 2.02124  | -7.47017 | 0.36643  | -5.49782 | 5.47361  | -0.04835 | -5.51287 | 5.47390  | -0.13059 |
| H  | 2.49885  | -7.02702 | 2.42475  | -5.80855 | 4.92815  | 2.01742  | -5.90234 | 4.90779  | 1.91616  |
| H  | 1.45805  | -7.59668 | -1.71413 | -4.95417 | 5.78735  | -2.11422 | -4.89016 | 5.80793  | -2.17082 |
| H  | 2.31166  | -8.51453 | 0.43709  | -6.26994 | 6.23768  | -0.04917 | -6.28723 | 6.23533  | -0.15469 |
| Fe | -0.00406 | 0.00105  | 0.08273  | 0.00283  | 0.00000  | 0.20509  | 0.00666  | -0.00001 | 0.46846  |
| H  | 0.02757  | -0.17590 | 1.53755  | 0.01990  | 0.00000  | 1.91996  | 0.04174  | -0.00001 | 2.13702  |

### H-FeTPP, total charge 1

|   | Singlet  |          |          | Triplet  |          |          | Quintet  |          |          |
|---|----------|----------|----------|----------|----------|----------|----------|----------|----------|
| N | -0.86780 | 1.78650  | -0.06706 | 1.95136  | -0.00451 | -0.12528 | 2.04011  | -0.00002 | -0.05769 |
| N | 1.75699  | 0.82956  | -0.01494 | -0.00462 | -1.96442 | 0.02988  | 0.00002  | -2.04134 | -0.01215 |
| N | 0.85393  | -1.81070 | -0.02218 | -1.95146 | 0.00453  | -0.12503 | -2.04146 | 0.00003  | 0.03207  |
| N | -1.71261 | -0.82899 | 0.06073  | 0.00458  | 1.96447  | 0.02975  | 0.00007  | 2.04133  | -0.01214 |
| C | -2.19097 | 2.07886  | 0.05030  | 2.79984  | 1.09921  | -0.23529 | 2.87082  | 1.10453  | -0.01522 |
| C | -2.45835 | 3.45200  | -0.30480 | 4.13344  | 0.67283  | -0.52831 | 4.24417  | 0.68252  | 0.06752  |
| C | -1.26166 | 4.00694  | -0.63647 | 4.13023  | -0.69197 | -0.52857 | 4.24415  | -0.68264 | 0.06751  |
| C | -0.25791 | 2.98993  | -0.42658 | 2.79465  | -1.11218 | -0.23563 | 2.87078  | -1.10461 | -0.01523 |
| C | 1.11049  | 3.20833  | -0.42211 | 2.42668  | -2.44009 | -0.02518 | 2.45026  | -2.45022 | -0.01552 |
| C | 2.03275  | 2.18343  | -0.07442 | 1.09863  | -2.80645 | 0.18076  | 1.10503  | -2.87254 | -0.01492 |
| C | 3.37267  | 2.44157  | 0.31017  | 0.67286  | -4.13524 | 0.49753  | 0.68286  | -4.24803 | -0.04113 |
| C | 3.93939  | 1.21996  | 0.62125  | -0.69207 | -4.13208 | 0.49765  | -0.68222 | -4.24817 | -0.02995 |
| C | 2.95269  | 0.23068  | 0.36518  | -1.11172 | -2.80131 | 0.18097  | -1.10461 | -2.87254 | -0.02518 |
| C | 3.20008  | -1.16009 | 0.38654  | -2.43812 | -2.42877 | -0.02458 | -2.44954 | -2.45031 | -0.03663 |
| C | 2.20496  | -2.09241 | 0.08347  | -2.79993 | -1.09919 | -0.23507 | -2.87042 | -1.10457 | -0.02687 |
| C | 2.45823  | -3.46626 | -0.26545 | -4.13358 | -0.67282 | -0.52793 | -4.24140 | -0.68249 | -0.14217 |
| C | 1.25434  | -4.01968 | -0.58972 | -4.13038 | 0.69199  | -0.52809 | -4.24139 | 0.68261  | -0.14218 |
| C | 0.26588  | -2.99542 | -0.38682 | -2.79476 | 1.11218  | -0.23530 | -2.87039 | 1.10466  | -0.02689 |
| C | -1.12806 | -3.20233 | -0.41173 | -2.42674 | 2.44011  | -0.02514 | -2.44947 | 2.45038  | -0.03665 |



|    |          |          |          |          |          |          |          |          |          |
|----|----------|----------|----------|----------|----------|----------|----------|----------|----------|
| C  | -2.02581 | -2.19256 | -0.08275 | -1.09866 | 2.80650  | 0.18052  | -1.10453 | 2.87257  | -0.02519 |
| C  | -3.40404 | -2.42310 | 0.25173  | -0.67289 | 4.13535  | 0.49713  | -0.68210 | 4.24819  | -0.02996 |
| C  | -3.95391 | -1.22741 | 0.59172  | 0.69203  | 4.13216  | 0.49738  | 0.68299  | 4.24801  | -0.04112 |
| C  | -2.94833 | -0.22035 | 0.40469  | 1.11169  | 2.80136  | 0.18084  | 1.10511  | 2.87251  | -0.01490 |
| C  | -3.19185 | 1.14103  | 0.39941  | 2.43807  | 2.42879  | -0.02470 | 2.45033  | 2.45015  | -0.01550 |
| H  | -3.43723 | 3.90688  | -0.32651 | 4.96452  | 1.33746  | -0.70981 | 5.09532  | 1.34218  | 0.14129  |
| H  | -1.06643 | 5.01016  | -0.98344 | 4.95819  | -1.36040 | -0.71034 | 5.09528  | -1.34233 | 0.14128  |
| H  | 3.82859  | 3.41803  | 0.37552  | 1.33773  | -4.96289 | 0.69394  | 1.34151  | -5.10255 | -0.06769 |
| H  | 4.93358  | 1.03261  | 0.99801  | -1.36075 | -4.95662 | 0.69419  | -1.34115 | -5.10292 | -0.02559 |
| H  | 3.43383  | -3.92742 | -0.30081 | -4.96467 | -1.33743 | -0.70940 | -5.09037 | -1.34185 | -0.23894 |
| H  | 1.05282  | -5.02309 | -0.93215 | -4.95837 | 1.36042  | -0.70972 | -5.09034 | 1.34199  | -0.23896 |
| H  | -3.87569 | -3.39436 | 0.25738  | -1.33779 | 4.96302  | 0.69337  | -1.34100 | 5.10296  | -0.02560 |
| H  | -4.96253 | -1.03338 | 0.92330  | 1.36069  | 4.95672  | 0.69390  | 1.34165  | 5.10251  | -0.06767 |
| C  | 4.57056  | -1.65621 | 0.66514  | -3.49825 | -3.47778 | -0.00917 | -3.50751 | -3.50049 | -0.07031 |
| C  | 4.78157  | -2.56366 | 1.72014  | -4.48697 | -3.47577 | 0.98827  | -4.37754 | -3.66210 | 1.02092  |
| C  | 5.66754  | -1.25460 | -0.11983 | -3.51792 | -4.48098 | -0.99185 | -3.64938 | -4.33410 | -1.19222 |
| C  | 6.06321  | -3.04087 | 1.99561  | -5.47455 | -4.46299 | 1.00478  | -5.36530 | -4.64841 | -0.99330 |
| H  | 3.93993  | -2.87407 | 2.33188  | -4.47148 | -2.70673 | 1.75521  | -4.26807 | -3.02335 | 1.89248  |
| C  | 6.94462  | -1.74919 | 0.14665  | -4.51326 | -5.46045 | -0.98026 | -4.64951 | -5.30770 | -1.22343 |
| H  | 5.50891  | -0.57941 | -0.95507 | -2.75967 | -4.48258 | -1.76960 | -2.98564 | -4.20605 | -2.04228 |
| C  | 7.14677  | -2.63739 | 1.20828  | -5.49131 | -5.45507 | 0.01930  | -5.50591 | -5.47004 | -0.12967 |
| H  | 6.21585  | -3.72643 | 2.82354  | -6.22802 | -4.45795 | 1.78658  | -6.02374 | -4.77416 | 1.84739  |
| H  | 7.78003  | -1.44564 | -0.47685 | -4.52530 | -6.22503 | -1.75111 | -4.75950 | -5.93767 | -2.10086 |
| H  | 8.14246  | -3.01586 | 1.41839  | -6.26210 | -6.21963 | 0.03020  | -6.27892 | -6.23204 | -0.15266 |
| C  | 1.65522  | 4.56223  | -0.70215 | 3.48191  | -3.49403 | -0.01009 | 3.50671  | -3.50241 | -0.00370 |
| C  | 1.29124  | 5.67055  | 0.08312  | 4.47088  | -3.49671 | 0.98711  | 3.65699  | -4.34574 | 1.10991  |
| C  | 2.56800  | 4.74226  | -1.75757 | 3.49663  | -4.49730 | -0.99280 | 4.36556  | -3.65741 | -1.10458 |
| C  | 1.82532  | 6.93162  | -0.18576 | 5.45380  | -4.48857 | 1.00336  | 4.65455  | -5.32239 | 1.12329  |
| H  | 0.61017  | 5.53390  | 0.91749  | 4.45915  | -2.72762 | 1.75407  | 3.00142  | -4.22338 | 1.96713  |
| C  | 3.08557  | 6.00796  | -2.03534 | 4.48735  | -5.48144 | -0.98147 | 5.35076  | -4.64662 | -1.09473 |
| H  | 2.85309  | 3.89076  | -2.36833 | 2.73819  | -4.49535 | -1.77037 | 4.24897  | -3.01158 | -1.96997 |
| C  | 2.71777  | 7.10458  | -1.24873 | 5.46565  | -5.48069 | 0.01785  | 5.50003  | -5.47781 | 0.02008  |
| H  | 1.54837  | 7.77694  | 0.43680  | 6.20746  | -4.48710 | 1.78499  | 4.77112  | -5.96003 | 1.99430  |
| H  | 3.77536  | 6.13767  | -2.86369 | 4.49561  | -6.24604 | -1.75235 | 6.00049  | -4.76718 | -1.95622 |
| H  | 3.12750  | 8.08749  | -1.46034 | 6.23285  | -6.24887 | 0.02855  | 6.27099  | -6.24218 | 0.02921  |
| C  | -4.55999 | 1.65678  | 0.68172  | 3.49828  | 3.47772  | -0.00916 | 3.50681  | 3.50231  | -0.00365 |
| C  | -5.64558 | 1.33163  | -0.14846 | 3.51810  | 4.48100  | -0.99176 | 3.65710  | 4.34564  | 1.10996  |
| C  | -4.76741 | 2.50871  | 1.77977  | 4.48695  | 3.47552  | 0.98833  | 4.36568  | 3.65730  | -1.10452 |
| C  | -6.91579 | 1.84635  | 0.11807  | 4.51353  | 5.46038  | -0.98001 | 4.65468  | 5.32226  | 1.12336  |
| H  | -5.48725 | 0.69126  | -1.01120 | 2.75990  | 4.48275  | -1.76955 | 3.00151  | 4.22329  | 1.96717  |
| C  | -6.04172 | 3.00899  | 2.05320  | 5.47462  | 4.46264  | 1.00498  | 5.35091  | 4.64647  | -1.09465 |
| H  | -3.93072 | 2.76651  | 2.42269  | 4.47135  | 2.70640  | 1.75519  | 4.24908  | 3.01147  | -1.96991 |
| C  | -7.11759 | 2.68101  | 1.22191  | 5.49152  | 5.45481  | 0.01959  | 5.50018  | 5.47765  | 0.02017  |
| H  | -7.74530 | 1.59834  | -0.53717 | 4.52569  | 6.22502  | -1.75080 | 4.77126  | 5.95989  | 1.99438  |
| H  | -6.19348 | 3.65484  | 2.91268  | 6.22805  | 4.45746  | 1.78682  | 6.00066  | 4.76702  | -1.95613 |
| H  | -8.10689 | 3.07632  | 1.43119  | 6.26239  | 6.21930  | 0.03061  | 6.27117  | 6.24200  | 0.02931  |
| C  | -1.66455 | -4.55928 | -0.70102 | -3.48195 | 3.49408  | -0.01008 | -3.50741 | 3.50060  | -0.07036 |
| C  | -1.34372 | -5.65674 | 0.11645  | -4.47067 | 3.49705  | 0.98735  | -4.37745 | 3.66224  | 1.02086  |
| C  | -2.52218 | -4.75009 | -1.79839 | -3.49686 | 4.49709  | -0.99305 | -3.64923 | 4.33420  | -1.19227 |
| C  | -1.87144 | -6.91922 | -0.15966 | -5.45357 | 4.48893  | 1.00357  | -5.36518 | 4.64857  | 0.99322  |
| H  | -0.69811 | -5.51287 | 0.97758  | -4.45879 | 2.72816  | 1.75451  | -4.26802 | 3.02349  | 1.99242  |
| C  | -3.03426 | -6.01715 | -2.08199 | -4.48755 | 5.48126  | -0.98175 | -4.64933 | 5.30783  | -1.22351 |
| H  | -2.77226 | -3.90554 | -2.43391 | -2.73859 | 4.49492  | -1.77079 | -2.98548 | 4.20613  | -2.04232 |
| C  | -2.71260 | -7.10346 | -1.26180 | -5.46563 | 5.48079  | 0.01779  | -5.50574 | 5.47021  | -0.12976 |
| H  | -1.62803 | -7.75704 | 0.48663  | -6.20706 | 4.48768  | 1.78536  | -6.02364 | 4.77435  | 1.84730  |
| H  | -3.68332 | -6.15559 | -2.94130 | -4.49597 | 6.24566  | -1.75282 | -4.75929 | 5.93780  | -2.10094 |
| H  | -3.11680 | -8.08745 | -1.47898 | -6.23280 | 6.24899  | 0.02846  | -6.27873 | 6.23223  | -0.15277 |
| Fe | -0.02285 | -0.02686 | 0.09306  | -0.00001 | 0.00001  | 0.06247  | 0.00567  | -0.00002 | 0.37286  |
| H  | -0.21282 | 0.13258  | 1.52364  | 0.00100  | 0.00022  | 1.56214  | 0.06969  | -0.00002 | 1.99435  |

### H-FeTPP, total charge -1

|   | Singlet  |          |          | Triplet  |          |          | Quintet  |          |          |
|---|----------|----------|----------|----------|----------|----------|----------|----------|----------|
| N | 0.00008  | -2.00474 | 0.01391  | -1.05680 | 1.74579  | -0.11682 | 1.98293  | 0.31478  | -0.05019 |
| N | -1.99733 | -0.00007 | -0.03257 | 1.69839  | 1.03150  | 0.00720  | 0.31842  | -1.99245 | -0.04649 |
| N | -0.00008 | 2.00475  | 0.01390  | 1.05603  | -1.74091 | -0.09262 | -1.97753 | -0.32307 | -0.01119 |
| N | 1.99733  | 0.00008  | -0.03257 | -1.69664 | -1.02681 | 0.05718  | -0.31163 | 1.97382  | -0.01645 |
| C | 1.09742  | -2.84262 | 0.06113  | -2.42841 | 1.88303  | -0.19529 | 2.63760  | 1.52506  | 0.08479  |
| C | 0.68077  | -4.22310 | 0.18638  | -2.77992 | 3.25114  | -0.38245 | 4.07035  | 1.31333  | 0.12164  |
| C | -0.68045 | -4.22315 | 0.18636  | -1.59644 | 3.96652  | -0.40090 | 4.28339  | -0.02355 | -0.02104 |
| C | -1.09720 | -2.84270 | 0.06112  | -0.54464 | 3.02512  | -0.20595 | 2.99049  | -0.65123 | -0.11657 |

|    |          |          |          |          |          |          |          |          |          |
|----|----------|----------|----------|----------|----------|----------|----------|----------|----------|
| C  | -2.43303 | -2.43454 | -0.01231 | 0.82594  | 3.35802  | -0.04898 | 2.80233  | -2.02205 | -0.19123 |
| C  | -2.83550 | -1.09784 | -0.09468 | 1.83392  | 2.41533  | 0.09051  | 1.54513  | -2.65058 | -0.14110 |
| C  | -4.21297 | -0.68055 | -0.25120 | 3.22333  | 2.75243  | 0.31406  | 1.35364  | -4.06136 | -0.11997 |
| C  | -4.21303 | 0.68024  | -0.25116 | 3.92727  | 1.59074  | 0.32430  | 0.00188  | -4.27876 | 0.02537  |
| C  | -2.83558 | 1.09763  | -0.09468 | 2.98763  | 0.51263  | 0.10374  | -0.62748 | -2.99254 | 0.05638  |
| C  | -2.43322 | 2.43436  | -0.01231 | 3.35702  | -0.81746 | -0.03307 | -2.02674 | -2.79523 | 0.14987  |
| C  | -1.09742 | 2.84263  | 0.06112  | 2.42594  | -1.87487 | -0.20617 | -2.62753 | -1.53680 | 0.07091  |
| C  | -0.68077 | 4.22311  | 0.18637  | 2.76988  | -3.23208 | -0.46770 | -4.06011 | -1.34162 | -0.03158 |
| C  | 0.68044  | 4.22316  | 0.18637  | 1.58625  | -3.94814 | -0.47726 | -4.27412 | -0.00490 | -0.17365 |
| C  | 1.09720  | 2.84271  | 0.06111  | 0.54076  | -3.01529 | -0.21934 | -2.98370 | 0.63612  | -0.13974 |
| C  | 2.43302  | 2.43455  | -0.01233 | -0.82940 | -3.35195 | -0.06340 | -2.79401 | 2.00714  | -0.20973 |
| C  | 2.83549  | 1.09785  | -0.09469 | -1.83757 | -2.41105 | 0.08945  | -1.53711 | 2.63373  | -0.13103 |
| C  | 4.21298  | 0.68057  | -0.25115 | -3.23598 | -2.75038 | 0.24694  | -1.34381 | 4.04371  | -0.11529 |
| C  | 4.21302  | -0.68022 | -0.25121 | -3.93808 | -1.58762 | 0.25822  | 0.00968  | 4.26069  | 0.01744  |
| C  | 2.83558  | -1.09762 | -0.09468 | -2.98611 | -0.50616 | 0.12495  | 0.63457  | 2.97418  | 0.08157  |
| C  | 2.43321  | -2.43435 | -0.01231 | -3.35347 | 0.82286  | -0.01746 | 2.03495  | 2.78074  | 0.17224  |
| H  | 1.34495  | -5.07112 | 0.27248  | -3.78625 | 3.63441  | -0.47092 | 4.80918  | 2.09048  | 0.25132  |
| H  | -1.34456 | -5.07123 | 0.27244  | -1.46984 | 5.03236  | -0.52469 | 5.22841  | -0.54780 | -0.03430 |
| H  | -5.05811 | -1.34509 | -0.36038 | 3.60070  | 3.75526  | 0.45262  | 2.13839  | -4.80028 | -0.19352 |
| H  | -5.05823 | 1.34471  | -0.36030 | 4.98973  | 1.46324  | 0.47313  | -0.50854 | -5.22734 | 0.10157  |
| H  | -1.34495 | 5.07113  | 0.27247  | 3.77083  | -3.60547 | -0.62977 | -4.79464 | -2.13387 | -0.02755 |
| H  | 1.34455  | 5.07124  | 0.27246  | 1.45457  | -5.00741 | -0.64503 | -5.21760 | 0.50677  | -0.29956 |
| H  | 5.05812  | 1.34511  | -0.36029 | -3.62235 | -3.75635 | 0.32290  | -2.12921 | 4.78214  | -0.18850 |
| H  | 5.05821  | -1.34470 | -0.36039 | -5.00870 | -1.46121 | 0.33160  | 0.52732  | 5.20809  | 0.05125  |
| C  | -3.49408 | 3.48834  | -0.00945 | 4.80547  | -1.17336 | 0.00166  | -2.90950 | -3.99110 | 0.27302  |
| C  | -3.64275 | 4.36793  | -1.09452 | 5.31954  | -1.98796 | 1.02647  | -3.67358 | -4.20390 | 1.43458  |
| C  | -4.36981 | 3.62319  | 1.08065  | 5.69274  | -0.71685 | -0.98850 | -3.01927 | -4.93217 | -0.76698 |
| C  | -4.63499 | 5.35228  | -1.09199 | 6.67440  | -2.32417 | 1.06787  | -4.51931 | -5.31048 | 1.55256  |
| H  | -2.96993 | 4.26993  | -1.94154 | 4.64065  | -2.35060 | 1.79258  | -3.59630 | -3.48540 | 2.24573  |
| C  | -5.36327 | 4.60615  | 1.08763  | 7.04993  | -1.05061 | -0.95047 | -3.85908 | -6.04259 | -0.65206 |
| H  | -4.26061 | 2.94693  | 1.92346  | 5.30402  | -0.09676 | -1.79108 | -2.43877 | -4.77791 | -1.67198 |
| C  | -5.50030 | 5.47575  | 0.00030  | 7.54761  | -1.85574 | 0.07881  | -4.61538 | -6.23760 | 0.50955  |
| H  | -4.73391 | 6.02039  | -1.94408 | 7.05007  | -2.94845 | 1.87494  | -5.09913 | -5.45101 | 2.46177  |
| H  | -6.02803 | 4.69459  | 1.94345  | 7.71638  | -0.68596 | -1.72841 | -3.92932 | -6.75219 | -1.47316 |
| H  | -6.27255 | 6.24086  | 0.00412  | 8.60239  | -2.11696 | 0.10992  | -5.27072 | -7.10027 | 0.59977  |
| C  | -3.49380 | -3.48861 | -0.00947 | 1.18682  | 4.80612  | -0.01802 | 4.01532  | -2.89307 | -0.27970 |
| C  | -4.36951 | -3.62356 | 1.08063  | 0.74069  | 5.63606  | 1.02575  | 4.44398  | -3.64481 | 0.82594  |
| C  | -3.64239 | -4.36820 | -1.09455 | 1.97510  | 5.38042  | -1.02997 | 4.75688  | -2.96958 | -1.46878 |
| C  | -5.36290 | -4.60660 | 1.08760  | 1.07938  | 6.99060  | 1.06304  | 5.58524  | -4.44777 | 0.74769  |
| H  | -4.26038 | -2.94730 | 1.92345  | 0.12709  | 5.20210  | 1.80967  | 3.87295  | -3.58917 | 1.74811  |
| C  | -4.63455 | -5.35263 | -1.09203 | 2.31721  | 6.73570  | -0.99608 | 5.89956  | -3.77180 | -1.55151 |
| H  | -2.96958 | -4.27012 | -1.94157 | 2.31724  | 4.74964  | -1.84541 | 4.42881  | -2.39083 | -2.32748 |
| C  | -5.49985 | -5.47619 | 0.00025  | 1.87099  | 7.54740  | 0.05147  | 6.31808  | -4.51413 | -0.44273 |
| H  | -6.02764 | -4.69512 | 1.94342  | 0.72939  | 7.61095  | 1.88453  | 5.90424  | -5.01804 | 1.61663  |
| H  | -4.73341 | -6.02074 | -1.94413 | 2.92809  | 7.15736  | -1.79066 | 6.46064  | -3.81738 | -2.48167 |
| H  | -6.27203 | -6.24138 | 0.00406  | 2.13532  | 8.60149  | 0.07961  | 7.20632  | -5.13783 | -0.50478 |
| C  | 3.49407  | -3.48833 | -0.00945 | -4.80666 | 1.17017  | 0.00936  | 2.89555  | 3.98865  | 0.32603  |
| C  | 4.36978  | -3.62322 | 1.08066  | -5.53324 | 1.13740  | 1.21087  | 2.83100  | 4.77358  | 1.49194  |
| C  | 3.64275  | -4.36791 | -1.09454 | -5.48036 | 1.54232  | -1.16581 | 3.78666  | 4.38854  | -0.68614 |
| C  | 5.36324  | -4.60619 | 1.08764  | -6.89478 | 1.45455  | 1.23686  | 3.63012  | 5.90894  | 1.64505  |
| H  | 4.26057  | -2.94698 | 1.92349  | -5.01674 | 0.85883  | 2.12502  | 2.14289  | 4.47873  | 2.27905  |
| C  | 4.63499  | -5.35226 | -1.09201 | -6.83996 | 1.86492  | -1.14373 | 4.59230  | 5.52084  | -0.53571 |
| H  | 2.96995  | -4.26988 | -1.94156 | -4.92476 | 1.57257  | -2.09878 | 3.83893  | 3.79837  | -1.59662 |
| C  | 5.50028  | -5.47576 | 0.00030  | -7.55408 | 1.82044  | 0.05896  | 4.51812  | 6.28810  | 0.63151  |
| H  | 6.02797  | -4.69466 | 1.94347  | -7.43849 | 1.42016  | -2.17782 | 3.56398  | 6.49508  | 2.55863  |
| H  | 4.73392  | -6.02035 | -1.94411 | -7.34278 | 2.14585  | -2.06597 | 5.27269  | 5.80775  | -1.33411 |
| H  | 6.27252  | -6.24088 | 0.00411  | -8.61219 | 2.06910  | 0.07747  | 5.14223  | 7.17034  | 0.74966  |
| C  | 3.49381  | 3.48861  | -0.00947 | -1.18663 | -4.80122 | -0.07464 | -3.99593 | 2.88604  | -0.34994 |
| C  | 3.64240  | 4.36821  | -1.09454 | -0.74344 | -5.65654 | 0.94968  | -4.88060 | 3.07638  | 0.72319  |
| C  | 4.36953  | 3.62352  | 1.08062  | -1.96070 | -5.35348 | -1.10963 | -4.26122 | 3.54592  | -1.56048 |
| C  | 4.63458  | 5.35263  | -1.09201 | -1.07293 | -7.01388 | 0.94736  | -6.00548 | 3.89621  | 0.58893  |
| H  | 2.96958  | 4.27016  | -1.94156 | -0.13868 | -5.24014 | 1.74989  | -4.67654 | 2.57323  | 1.66387  |
| C  | 5.36293  | 4.60656  | 1.08760  | -2.29390 | -6.71140 | -1.11534 | -5.38412 | 4.36661  | -1.69889 |
| H  | 4.26039  | 2.94725  | 1.92343  | -2.29829 | -4.70376 | -1.91197 | -3.57688 | 3.40641  | -2.39234 |
| C  | 5.49988  | 5.47616  | 0.00027  | -1.85188 | -7.54821 | -0.08591 | -6.26177 | 4.54438  | -0.62355 |
| H  | 4.73344  | 6.02075  | -1.94410 | -0.72522 | -7.65418 | 1.75441  | -6.67873 | 4.03048  | 1.43200  |
| H  | 6.02768  | 4.69505  | 1.94342  | -2.89393 | -7.11556 | -1.92709 | -5.57491 | 4.86461  | -2.64632 |
| H  | 6.27207  | 6.24134  | 0.00409  | -2.10918 | -8.60441 | -0.08878 | -7.13568 | 5.18221  | -2.39268 |
| Fe | 0.00000  | 0.00001  | 0.09284  | 0.00255  | 0.00470  | 0.24184  | 0.00837  | -0.00327 | 0.08944  |
| H  | 0.00001  | 0.00001  | 1.57345  | 0.01238  | 0.03196  | 1.92458  | -0.07476 | -0.13948 | 1.55030  |

|   | <b>H<sub>2</sub>TPP, total charge 0</b> |                |          | <b>H<sub>2</sub>TPP, total charge 1</b> |                |          | <b>H-H<sub>2</sub>TPP, total charge 0</b> |                |          |
|---|-----------------------------------------|----------------|----------|-----------------------------------------|----------------|----------|-------------------------------------------|----------------|----------|
|   |                                         | <b>Singlet</b> |          |                                         | <b>Doublet</b> |          |                                           | <b>Doublet</b> |          |
| N | 0.00135                                 | 2.10727        | -0.06220 | -2.10492                                | 0.00049        | -0.12532 | 0.00812                                   | 2.13289        | -0.02771 |
| N | 2.04307                                 | -0.00128       | 0.00000  | 0.00048                                 | 2.05736        | -0.00001 | 2.02709                                   | 0.00037        | -0.12836 |
| N | -0.00135                                | -2.10727       | 0.06220  | 2.10492                                 | -0.00049       | 0.12532  | 0.00903                                   | -2.13291       | -0.02773 |
| N | -2.04307                                | 0.00128        | 0.00000  | -0.00048                                | -2.05737       | 0.00001  | -2.13143                                  | -0.00042       | 0.09419  |
| C | -1.13031                                | 2.89006        | -0.01337 | -2.88657                                | -1.12580       | -0.02922 | -1.13192                                  | 2.90151        | 0.15920  |
| C | -0.68325                                | 4.25190        | 0.06430  | -4.23626                                | -0.68725       | 0.12951  | -0.65902                                  | 4.22035        | 0.51301  |
| C | 0.68864                                 | 4.25104        | 0.06431  | -4.23593                                | 0.68920        | 0.12956  | 0.70774                                   | 4.21876        | 0.47996  |
| C | 1.13398                                 | 2.88864        | -0.01337 | -2.88604                                | 1.12714        | -0.02914 | 1.15537                                   | 2.90047        | 0.11553  |
| C | 2.46410                                 | 2.43865        | -0.00168 | -2.43808                                | 2.47258        | -0.01172 | 2.46112                                   | 2.45389        | -0.06400 |
| C | 2.87039                                 | 1.08786        | 0.00018  | -1.08730                                | 2.88944        | -0.00426 | 2.84713                                   | 1.09312        | -0.26831 |
| C | 4.27263                                 | 0.67587        | -0.00473 | -0.67732                                | 4.28840        | -0.01214 | 4.20007                                   | 0.68534        | -0.57465 |
| C | 4.27177                                 | -0.68129       | 0.00465  | 0.67931                                 | 4.28809        | 0.01204  | 4.20033                                   | -0.68361       | -0.57469 |
| C | 2.86900                                 | -1.09149       | -0.00020 | 1.08865                                 | 2.88894        | 0.00422  | 2.84753                                   | -1.09192       | -0.26835 |
| C | 2.46099                                 | -2.44176       | 0.00167  | -2.43923                                | 2.47145        | 0.01171  | 2.46211                                   | -2.45300       | -0.06417 |
| C | 1.13031                                 | -2.89006       | 0.01337  | 2.88657                                 | 1.12580        | 0.02916  | 1.15657                                   | -2.90005       | 0.11529  |
| C | 0.68325                                 | -4.25190       | -0.06431 | 4.23626                                 | 0.68722        | -0.12952 | 0.70942                                   | -4.21865       | 0.47952  |
| C | -0.68864                                | -4.25104       | -0.06431 | 4.23594                                 | -0.68922       | -0.12947 | -0.65728                                  | -4.22075       | 0.51271  |
| C | -1.13398                                | -2.88864       | 0.01337  | 2.88604                                 | -1.12714       | 0.02924  | -1.13074                                  | -2.90198       | 0.15917  |
| C | -2.46410                                | -2.43865       | 0.00168  | 2.43808                                 | -2.47259       | 0.01185  | -2.45547                                  | -2.49484       | 0.01933  |
| C | -2.87039                                | -1.08786       | -0.00018 | 1.08730                                 | -2.88945       | 0.00431  | -2.87690                                  | -1.14252       | -0.20324 |
| C | -4.27263                                | -0.67587       | 0.00474  | 0.67731                                 | -4.28841       | 0.01214  | -4.08569                                  | -0.70132       | -0.76409 |
| C | -4.27177                                | 0.68129        | -0.00465 | -0.67931                                | -4.28810       | -0.01214 | -4.08600                                  | 0.69956        | -0.76415 |
| C | -2.86900                                | 1.09149        | 0.00020  | -1.08865                                | -2.88895       | -0.00431 | -2.87736                                  | 1.14134        | -0.20337 |
| C | -2.46099                                | 2.44176        | -0.00167 | -2.43923                                | -2.47146       | -0.01184 | -2.45655                                  | 2.49383        | 0.01915  |
| H | -1.33886                                | 5.10699        | 0.13062  | -5.08477                                | -1.34018       | 0.26223  | -1.30600                                  | 5.04284        | 0.77820  |
| H | 1.34532                                 | 5.10530        | 0.13062  | -5.08414                                | 1.34251        | 0.26234  | 1.36776                                   | 5.04171        | 0.71082  |
| H | 5.12586                                 | 1.33846        | -0.01628 | -1.33653                                | 5.14268        | -0.03770 | 5.03241                                   | 1.34615        | -0.76921 |
| H | 5.12415                                 | -1.34497       | 0.01615  | 1.33893                                 | 5.14206        | 0.03757  | 5.03292                                   | -1.34407       | -0.76934 |
| H | 1.33886                                 | -5.10699       | -0.13062 | 5.08478                                 | 1.34014        | -0.26227 | 1.36978                                   | -5.04138       | 0.71019  |
| H | -1.34532                                | -5.10530       | -0.13063 | 5.08414                                 | -1.34254       | -0.26218 | -1.30395                                  | -5.04352       | 0.77782  |
| H | -5.12586                                | -1.33846       | 0.01628  | 1.33653                                 | -5.14269       | 0.03773  | -4.85270                                  | -1.35409       | -1.15377 |
| H | -5.12415                                | 1.34497        | -0.01615 | -1.33892                                | -5.14207       | -0.03774 | -4.85327                                  | 1.35195        | -1.15392 |
| C | 3.51884                                 | -3.50153       | -0.02655 | 3.50180                                 | 3.51411        | -0.02635 | 3.53891                                   | -3.48695       | -0.01098 |
| C | 3.75061                                 | -4.31028       | 1.09703  | 4.41336                                 | 3.63802        | 1.03711  | 4.53742                                   | -3.43149       | 0.97666  |
| C | 4.29299                                 | -3.70845       | -1.17913 | 3.61258                                 | 4.38016        | -1.12848 | 3.57218                                   | -4.53947       | -0.94086 |
| C | 4.73575                                 | -5.30112       | 1.07093  | 5.40603                                 | 4.61867        | 1.00423  | 5.53681                                   | -4.40469       | 1.03644  |
| H | 3.15738                                 | -4.15292       | 1.99333  | 4.32806                                 | 2.97734        | 1.89481  | 4.51918                                   | -2.62105       | 1.69909  |
| C | 5.27710                                 | -4.69994       | -1.20754 | 4.61903                                 | 5.34608        | -1.16692 | 4.57429                                   | -5.51192       | -0.88507 |
| H | 4.11619                                 | -3.08787       | -2.05285 | 2.91923                                 | 4.28109        | -1.95822 | 2.81115                                   | -4.58394       | -1.71454 |
| C | 5.50177                                 | -5.49914       | -0.08207 | 5.51409                                 | 5.47129        | -0.09916 | 5.55934                                   | -5.44840       | 0.10486  |
| H | 4.90605                                 | -5.91490       | 1.95107  | 6.09351                                 | 4.71644        | 1.83887  | 6.29633                                   | -4.34951       | 1.81138  |
| H | 5.86553                                 | -4.84899       | -2.10858 | 4.70436                                 | 5.99954        | -2.02977 | 4.58743                                   | -6.31460       | -1.61721 |
| H | 6.26745                                 | -6.26940       | -0.10335 | 6.29147                                 | 6.22867        | -0.12716 | 6.33856                                   | -6.20399       | 0.14973  |
| C | 3.52329                                 | 3.49708        | 0.02655  | -3.50016                                | 3.51574        | 0.02635  | 3.53746                                   | 3.48836        | -0.01068 |
| C | 4.29779                                 | 3.70293        | 1.17909  | -3.61049                                | 4.38187        | 1.12846  | 4.53573                                   | 3.43343        | 0.97722  |
| C | 3.75602                                 | 4.30562        | -1.09699 | -4.41170                                | 3.64005        | -1.03708 | 3.57044                                   | 4.54079        | -0.94066 |
| C | 5.28317                                 | 4.69316        | 1.20750  | -4.61649                                | 5.34826        | 1.16692  | 5.53467                                   | 4.40710        | 1.03714  |
| H | 4.12027                                 | 3.08251        | 2.05277  | -2.91715                                | 4.28250        | 1.95817  | 4.51767                                   | 2.62304        | 1.69971  |
| C | 4.74242                                 | 5.29520        | -1.07089 | -5.40391                                | 4.62117        | -1.00419 | 4.57213                                   | 5.51366        | -0.88476 |
| H | 3.16253                                 | 4.14908        | -1.99326 | -4.32674                                | 2.97931        | -1.89476 | 2.80953                                   | 4.58485        | -1.71448 |
| C | 5.50878                                 | 5.49215        | 0.08208  | -5.51153                                | 5.47386        | 0.09919  | 5.55697                                   | 5.45068        | 0.10542  |
| H | 5.87186                                 | 4.84140        | 2.10851  | -4.70148                                | 6.00178        | 2.02975  | 6.29402                                   | 4.35236        | 1.81228  |
| H | 4.91345                                 | 5.90882        | -1.95100 | -6.09137                                | 4.71924        | -1.83880 | 4.58513                                   | 6.31626        | -1.61699 |
| H | 6.27544                                 | 6.26143        | 0.10335  | -6.28855                                | 6.23161        | 0.12720  | 6.33583                                   | 6.20662        | 0.15039  |
| C | -3.51884                                | 3.50153        | 0.02655  | -3.50181                                | -3.51411       | 0.02610  | -3.52980                                  | 3.52575        | 0.03733  |
| C | -4.29299                                | 3.70846        | 1.17914  | -3.61265                                | -4.38025       | 1.12816  | -4.62652                                  | 3.40268        | 0.91072  |
| C | -3.75062                                | 4.31028        | -1.09704 | -4.41332                                | -3.63793       | -1.03741 | -3.48726                                  | 4.63534        | -0.82627 |
| C | -5.27710                                | 4.69994        | 1.20755  | -4.61911                                | -5.34615       | 1.16648  | -5.63712                                  | 4.36458        | 0.93187  |
| H | -4.11618                                | 3.08788        | 2.05285  | -2.91934                                | -4.28124       | 1.95794  | -4.67524                                  | 2.54757        | 1.57834  |
| C | -4.73575                                | 5.30112        | -1.07093 | -5.40600                                | -4.61858       | -1.00465 | -4.49869                                  | 5.59866        | -0.80659 |
| H | -3.15739                                | 4.15292        | -1.99334 | -4.32798                                | -2.97719       | -1.89505 | -2.65951                                  | 4.73035        | -1.52269 |
| C | -5.50177                                | 5.49914        | 0.08208  | -5.51413                                | -5.47127       | 0.09867  | -5.57695                                  | 5.46849        | 0.07369  |
| H | -5.86552                                | 4.84900        | 2.10859  | -4.70449                                | -5.99967       | 2.02928  | -6.46981                                  | 4.25524        | 1.62118  |
| H | -4.90605                                | 5.91490        | -1.95107 | -6.09345                                | -4.71627       | -1.83932 | -4.44832                                  | 6.44517        | -1.48584 |
| H | -6.26745                                | 6.26940        | 0.10335  | -6.29152                                | -6.22865       | 0.12658  | -6.36450                                  | 6.21645        | 0.08870  |

|   |          |          |          |          |          |          |          |          |          |
|---|----------|----------|----------|----------|----------|----------|----------|----------|----------|
| C | -3.52329 | -3.49708 | -0.02655 | 3.50017  | -3.51574 | -0.02610 | -3.52837 | -3.52716 | 0.03771  |
| C | -3.75602 | -4.30562 | 1.09699  | 4.41161  | -3.64000 | 1.03742  | -4.62487 | -3.40454 | 0.91143  |
| C | -4.29780 | -3.70293 | -1.17909 | 3.61061  | -4.38191 | -1.12817 | -3.48568 | -4.63664 | -0.82599 |
| C | -4.74242 | -5.29520 | 1.07088  | 5.40383  | -4.62112 | 1.00465  | -5.63513 | -4.36679 | 0.93280  |
| H | -3.16252 | -4.14909 | 1.99326  | 4.32656  | -2.97924 | 1.89507  | -4.67370 | -2.54949 | 1.57913  |
| C | -5.28318 | -4.69315 | -1.20750 | 4.61662  | -5.34829 | -1.16650 | -4.49679 | -5.60032 | -0.80612 |
| H | -4.12027 | -3.08250 | -2.05277 | 2.91735  | -4.28256 | -1.95795 | -2.65808 | -4.73131 | -1.52265 |
| C | -5.50879 | -5.49215 | -0.08208 | 5.51157  | -5.47384 | -0.09869 | -5.57483 | -5.47059 | 0.07448  |
| H | -4.91344 | -5.90883 | 1.95099  | 6.09123  | -4.71915 | 1.83933  | -6.46766 | -4.25781 | 1.62236  |
| H | -5.87186 | -4.84139 | -2.10851 | 4.70170  | -6.00183 | -2.02931 | -4.44632 | -6.44674 | -1.48547 |
| H | -6.27545 | -6.26143 | -0.10335 | 6.28860  | -6.23158 | -0.12660 | -6.36211 | -6.21882 | 0.08964  |
| H | -0.00072 | -1.09336 | 0.09242  | 1.09392  | -0.00024 | 0.20753  | 0.06643  | -1.18187 | -0.36429 |
| H | 0.00072  | 1.09336  | -0.09242 | -1.09393 | 0.00026  | -0.20754 | 0.06588  | 1.18196  | -0.36450 |
| H |          |          |          |          |          |          | -1.40739 | -0.00024 | 0.80142  |

|   | MgTPP, total charge 0 |          |          | MgTPP, total charge 1 |          |          | H-MgTPP, total charge 0 |          |          |
|---|-----------------------|----------|----------|-----------------------|----------|----------|-------------------------|----------|----------|
|   | Singlet               |          |          | Doublet               |          |          | Doublet                 |          |          |
| N | -2.06503              | 0.00000  | -0.03095 | -1.46840              | -1.46140 | -0.01057 | -2.06539                | -0.00003 | -0.05011 |
| N | 0.00000               | 2.06537  | 0.00000  | -1.46276              | 1.46705  | 0.01061  | 0.00192                 | 2.06759  | -0.01491 |
| N | 2.06503               | 0.00000  | 0.03095  | 1.46589               | 1.46217  | 0.05694  | 2.06979                 | 0.00003  | 0.02867  |
| N | 0.00000               | -2.06537 | 0.00000  | 1.46024               | -1.46780 | -0.05690 | 0.00197                 | -2.06760 | -0.01491 |
| C | -2.88267              | -1.10790 | 0.00861  | -1.27311              | -2.82244 | -0.03872 | -2.88281                | -1.10911 | -0.00493 |
| C | -4.26448              | -0.68268 | 0.08272  | -2.54658              | -3.49613 | -0.11826 | -4.26399                | -0.68279 | 0.07510  |
| C | -4.26448              | 0.68268  | 0.08272  | -3.51088              | -2.52695 | -0.10526 | -4.26401                | 0.68268  | 0.07512  |
| C | -2.88267              | 1.10790  | 0.00861  | -2.82857              | -1.25734 | -0.04853 | -2.88284                | 1.10904  | -0.00493 |
| C | -2.45195              | 2.45216  | 0.01096  | -3.47322              | 0.00669  | -0.00003 | -2.44971                | 2.45111  | -0.00595 |
| C | -1.10804              | 2.88383  | 0.00481  | -2.82372              | 1.26823  | 0.04852  | -1.10517                | 2.88449  | -0.01028 |
| C | -0.68269              | 4.26753  | -0.00228 | -3.50113              | 2.54045  | 0.10527  | -0.68104                | 4.26930  | -0.01511 |
| C | 0.68269               | 4.26753  | 0.00228  | -2.53311              | 3.50592  | 0.11834  | 0.68415                 | 4.27003  | -0.00766 |
| C | 1.10805               | 2.88383  | -0.00481 | -1.26225              | 2.82733  | 0.03882  | 1.10964                 | 2.88576  | -0.01584 |
| C | 2.45195               | 2.45215  | -0.01096 | 0.00254               | 3.47329  | -0.00661 | 2.45284                 | 2.45201  | -0.02014 |
| C | 2.88267               | 1.10790  | -0.00861 | 1.26428               | 2.81955  | -0.04092 | 2.88596                 | 1.10702  | -0.01594 |
| C | 4.26448               | 0.68268  | -0.08272 | 2.52775               | 3.48785  | -0.23318 | 4.26791                 | 0.68281  | -0.09752 |
| C | 4.26448               | -0.68268 | -0.08272 | 3.49352               | 2.51945  | -0.23607 | 4.26792                 | -0.68271 | -0.09754 |
| C | 2.88267               | -1.10790 | -0.00861 | 2.82237               | 1.25745  | -0.04470 | 2.88599                 | -1.10695 | -0.01594 |
| C | 2.45195               | -2.45216 | -0.01096 | 3.47123               | -0.00668 | -0.00004 | 2.45290                 | -2.45195 | -0.02014 |
| C | 1.10804               | -2.88383 | -0.00481 | 2.81751               | -1.26829 | 0.04467  | 1.10971                 | -2.88574 | -0.01584 |
| C | 0.68269               | -4.26753 | 0.00228  | 3.48381               | -2.53286 | 0.23604  | 0.68425                 | -4.27002 | -0.00765 |
| C | -0.68269              | -4.26753 | -0.00228 | 2.51432               | -3.49754 | 0.23322  | -0.68093                | -4.26931 | -0.01511 |
| C | -1.10805              | -2.88383 | 0.00481  | 1.25342               | -2.82439 | 0.04101  | -1.10510                | -2.88452 | -0.01027 |
| C | -2.45195              | -2.45215 | 0.01096  | -0.01083              | -3.47326 | 0.00674  | -2.44965                | -2.45117 | -0.00595 |
| H | -5.11840              | -1.34133 | 0.14507  | -2.69181              | -4.56376 | -0.18033 | -5.11803                | -1.34109 | 0.13990  |
| H | -5.11840              | 1.34133  | 0.14507  | -4.58095              | -2.66586 | -0.13020 | -5.11806                | 1.34096  | 0.13993  |
| H | -1.34087              | 5.12398  | -0.01022 | -4.57066              | 2.68348  | 0.13017  | -1.33957                | 5.12543  | -0.02305 |
| H | 1.34087               | 5.12397  | 0.01021  | -2.67424              | 4.57409  | 0.18043  | 1.34171                 | 5.12686  | 0.00344  |
| H | 5.11840               | 1.34133  | -0.14506 | 2.66257               | 4.54870  | -0.37978 | 5.12146                 | 1.34127  | -0.16579 |
| H | 5.11840               | -1.34133 | -0.14506 | 4.55403               | 2.65199  | -0.38696 | 5.12149                 | -1.34115 | -0.16581 |
| H | 1.34087               | -5.12398 | 0.01022  | 4.54381               | -2.66948 | 0.38688  | 1.34184                 | -5.12683 | 0.00345  |
| H | -1.34087              | -5.12397 | -0.01023 | 2.64507               | -4.55889 | 0.37985  | -1.33945                | -5.12547 | -0.02306 |
| C | 3.51275               | 3.50920  | -0.03023 | 0.01097               | 4.96111  | -0.03285 | 3.51390                 | 3.50829  | -0.03818 |
| C | 4.32196               | 3.73002  | 1.09540  | 0.63049               | 5.68592  | 1.00128  | 4.32865                 | 3.72030  | 1.08519  |
| C | 3.71984               | 4.29611  | -1.17417 | -0.59364              | 5.66242  | -1.09168 | 3.71546                 | 4.30273  | -1.17788 |
| C | 5.31313               | 4.71491  | 1.07929  | 0.63261               | 7.08126  | 0.98234  | 5.31988                 | 4.70502  | 1.07102  |
| H | 4.16633               | 3.12589  | 1.98466  | 1.09241               | 5.15125  | 1.82584  | 4.17698                 | 3.11007  | 1.97092  |
| C | 4.71184               | 5.28007  | -1.19307 | -0.57091              | 7.05743  | -1.11826 | 4.70840                 | 5.28568  | -1.19487 |
| H | 3.09992               | 4.12838  | -2.05025 | -1.06198              | 5.10976  | -1.90056 | 3.09117                 | 4.14138  | -2.05202 |
| C | 5.51138               | 5.49294  | -0.06565 | 0.03673               | 7.77006  | -0.07923 | 5.51322                 | 5.49046  | -0.06972 |
| H | 5.92774               | 4.87521  | 1.96077  | 1.09920               | 7.62956  | 1.79506  | 5.93855                 | 4.85921  | 1.95070  |
| H | 4.86128               | 5.87723  | -2.08833 | -1.02630              | 7.58696  | -1.94956 | 4.85424                 | 5.88856  | -2.08685 |
| H | 6.28227               | 6.25817  | -0.07932 | 0.04639               | 8.85558  | -0.09710 | 6.28452                 | 6.25529  | -0.08189 |
| C | -3.51275              | 3.50920  | 0.03023  | -4.96486              | 0.00956  | -0.00008 | -3.51009                | 3.50839  | 0.01702  |
| C | -3.71983              | 4.29612  | 1.17417  | -5.67487              | 0.43398  | 1.13570  | -3.71512                | 4.29105  | 1.16417  |
| C | -4.32196              | 3.73002  | -1.09540 | -5.67641              | -0.41213 | -1.13592 | -4.32072                | 3.73205  | -1.10683 |
| C | -4.71183              | 5.28008  | 1.19307  | -7.07102              | 0.42793  | 1.13690  | -4.70754                | 5.27438  | 1.18772  |
| H | -3.09991              | 4.12840  | 2.05025  | -5.13014              | 0.75408  | 2.01907  | -3.09374                | 4.12040  | 2.03863  |
| C | -5.31313              | 4.71491  | -1.07929 | -7.07252              | -0.40069 | -1.13723 | -5.31176                | 4.71699  | -1.08600 |
| H | -4.16633              | 3.12588  | -1.98466 | -5.13285              | -0.73433 | -2.01925 | -4.16637                | 3.13060  | -1.99813 |
| C | -5.51138              | 5.49294  | 0.06565  | -7.77269              | 0.01497  | -0.00020 | -5.50852                | 5.49089  | 0.06199  |
| H | -4.86127              | 5.87724  | 2.08832  | -7.60919              | 0.74536  | 2.02489  | -4.85608                | 5.86833  | 2.08523  |

|    |          |          |          |          |          |          |          |          |          |
|----|----------|----------|----------|----------|----------|----------|----------|----------|----------|
| H  | -5.92774 | 4.87520  | -1.96076 | -7.61185 | -0.71603 | -2.02528 | -5.92761 | 4.88028  | -1.96604 |
| H  | -6.28226 | 6.25818  | 0.07932  | -8.85837 | 0.01707  | -0.00024 | -6.27952 | 6.25593  | 0.07929  |
| C  | -3.51275 | -3.50920 | 0.03023  | -0.00814 | -4.96110 | 0.03303  | -3.51001 | -3.50847 | 0.01702  |
| C  | -3.71984 | -4.29612 | 1.17417  | -0.61544 | -5.66003 | 1.09189  | -3.71502 | -4.29114 | 1.16417  |
| C  | -4.32196 | -3.73001 | -1.09540 | 0.60852  | -5.68835 | -1.00111 | -4.32063 | -3.73214 | -1.10683 |
| C  | -4.71183 | -5.28008 | 1.19306  | -0.59814 | -7.05512 | 1.11851  | -4.70742 | -5.27450 | 1.18772  |
| H  | -3.09991 | -4.12840 | 2.05025  | -1.08160 | -5.10553 | 1.90078  | -3.09365 | -4.12048 | 2.03863  |
| C  | -5.31314 | -4.71491 | -1.07929 | 0.60520  | -7.08368 | -0.98214 | -5.31165 | -4.71711 | -1.08601 |
| H  | -4.16634 | -3.12588 | -1.98466 | 1.07246  | -5.15551 | -1.82571 | -4.16629 | -3.13069 | -1.99813 |
| C  | -5.51138 | -5.49294 | 0.06565  | 0.00668  | -7.77013 | 0.07947  | -5.50839 | -5.49102 | 0.06198  |
| H  | -4.86127 | -5.87724 | 2.08832  | -1.05557 | -7.58285 | 1.94983  | -4.85595 | -5.86845 | 2.08522  |
| H  | -5.92775 | -4.87520 | -1.96076 | 1.06961  | -7.63382 | -1.79486 | -5.92750 | -4.88040 | -1.96604 |
| H  | -6.28227 | -6.25817 | 0.07931  | 0.01210  | -8.85568 | 0.09737  | -6.27938 | -6.25607 | 0.07928  |
| C  | 3.51275  | -3.50920 | -0.03023 | 4.95762  | -0.00954 | -0.00009 | 3.51399  | -3.50820 | -0.03817 |
| C  | 4.32195  | -3.73002 | 1.09540  | 5.67310  | 0.64775  | 1.01796  | 4.32874  | -3.72020 | 1.08519  |
| C  | 3.71984  | -4.29612 | -1.17417 | 5.67046  | -0.66962 | -1.01819 | 3.71557  | -4.30263 | -1.17788 |
| C  | 5.31313  | -4.71491 | 1.07930  | 7.06819  | 0.63442  | 1.02247  | 5.31999  | -4.70490 | 1.07102  |
| H  | 4.16632  | -3.12589 | 1.98466  | 5.13053  | 1.14891  | 1.81381  | 4.17705  | -3.10998 | 1.97092  |
| C  | 4.71183  | -5.28007 | -1.19307 | 7.06560  | -0.66172 | -1.02279 | 4.70853  | -5.28556 | -1.19487 |
| H  | 3.09992  | -4.12839 | -2.05025 | 5.12589  | -1.16868 | -1.81399 | 3.09128  | -4.14130 | -2.05202 |
| C  | 5.51138  | -5.49294 | -0.06565 | 7.76767  | -0.01502 | -0.00019 | 5.51335  | -5.49033 | -0.06972 |
| H  | 5.92773  | -4.87521 | 1.96077  | 7.60836  | 1.12983  | 1.82345  | 5.93865  | -4.85909 | 1.95071  |
| H  | 4.86128  | -5.87723 | -2.08832 | 7.60378  | -1.15924 | -1.82381 | 4.85439  | -5.88844 | -2.08685 |
| H  | 6.28226  | -6.25818 | -0.07931 | 8.85339  | -0.01713 | -0.00022 | 6.28467  | -6.25514 | -0.08189 |
| Mg | 0.00000  | 0.00000  | 0.00000  | -0.00118 | 0.00001  | 0.00003  | 0.00228  | 0.00000  | 0.06983  |
| H  |          |          |          |          |          |          | -0.67500 | -0.00003 | 2.18779  |

### MnTPP, total charge 0

|   | Doublet  |          | Quartet  |          |          | Sextet   |          |          |          |
|---|----------|----------|----------|----------|----------|----------|----------|----------|----------|
| N | 2.02479  | 0.00000  | -0.01387 | 2.02743  | -0.00003 | -0.01533 | 2.09105  | 0.00000  | -0.05660 |
| N | 0.00000  | -2.02508 | 0.00000  | -0.00003 | -2.02770 | 0.00000  | 0.00000  | -2.09106 | 0.00000  |
| N | -2.02479 | 0.00000  | 0.01386  | -2.02743 | 0.00002  | 0.01532  | -2.09105 | 0.00000  | 0.05660  |
| N | 0.00000  | 2.02508  | 0.00000  | 0.00003  | 2.02769  | 0.00000  | 0.00000  | 2.09106  | 0.00000  |
| C | 2.85603  | 1.10354  | 0.01463  | 2.85760  | 1.10373  | 0.01364  | 2.89828  | 1.11272  | -0.00144 |
| C | 4.23516  | 0.68165  | 0.07410  | 4.23689  | 0.68162  | 0.07345  | 4.27913  | 0.68340  | 0.09323  |
| C | 4.23516  | -0.68163 | 0.07411  | 4.23688  | -0.68175 | 0.07336  | 4.27913  | -0.68340 | 0.09323  |
| C | 2.85604  | -1.10353 | 0.01463  | 2.85757  | -1.10381 | 0.01353  | 2.89828  | -1.11272 | -0.00144 |
| C | 2.44405  | -2.44418 | 0.01448  | 2.44439  | -2.44465 | 0.01380  | 2.45768  | -2.45786 | 0.00392  |
| C | 1.10363  | -2.85681 | 0.00651  | 1.10383  | -2.85841 | 0.00612  | 1.11296  | -2.89980 | 0.00137  |
| C | 0.68165  | -4.23713 | -0.00103 | 0.68161  | -4.23893 | -0.00148 | 0.68344  | -4.28368 | -0.00414 |
| C | -0.68163 | -4.23714 | 0.00127  | -0.68172 | -4.23892 | 0.00162  | -0.68344 | -4.28368 | 0.00415  |
| C | -1.10362 | -2.85681 | -0.00643 | -1.10390 | -2.85838 | -0.00607 | -1.11297 | -2.89980 | -0.00137 |
| C | -2.44404 | -2.44419 | -0.01448 | -2.44446 | -2.44459 | -0.01380 | -2.45768 | -2.45786 | -0.00393 |
| C | -2.85603 | -1.10354 | -0.01472 | -2.85760 | -1.10374 | -0.01358 | -2.89828 | -1.11272 | 0.00144  |
| C | -4.23515 | -0.68164 | -0.07435 | -4.23689 | -0.68164 | -0.07351 | -4.27913 | -0.68340 | -0.09324 |
| C | -4.23516 | 0.68163  | -0.07434 | -4.23687 | 0.68173  | -0.07359 | -4.27913 | 0.68340  | -0.09324 |
| C | -2.85604 | 1.10353  | -0.01471 | -2.85757 | 1.10380  | -0.01370 | -2.89828 | 1.11272  | 0.00144  |
| C | -2.44405 | 2.44419  | -0.01446 | -2.44439 | 2.44464  | -0.01400 | -2.45768 | 2.45786  | -0.00392 |
| C | -1.10363 | 2.85681  | -0.00642 | -1.10383 | 2.85840  | -0.00619 | -1.11296 | 2.89980  | -0.00137 |
| C | -0.68165 | 4.23713  | 0.00127  | -0.68161 | 4.23892  | 0.00154  | -0.68344 | 4.28368  | 0.00415  |
| C | 0.68164  | 4.23713  | -0.00104 | 0.68172  | 4.23891  | -0.00140 | 0.68344  | 4.28368  | -0.00414 |
| C | 1.10362  | 2.85681  | 0.00650  | 1.10390  | 2.85837  | 0.00624  | 1.11297  | 2.89980  | 0.00137  |
| C | 2.44404  | 2.44419  | 0.01446  | 2.44446  | 2.44458  | 0.01400  | 2.45768  | 2.45786  | 0.00392  |
| H | 5.08634  | 1.34458  | 0.12461  | 5.08823  | 1.34439  | 0.12415  | 5.13422  | 1.33907  | 0.17145  |
| H | 5.08634  | -1.34456 | 0.12462  | 5.08819  | -1.34454 | 0.12398  | 5.13422  | -1.33907 | 0.17145  |
| H | 1.34425  | -5.08999 | -0.00676 | 1.34398  | -5.09201 | -0.00781 | 1.33840  | -5.14270 | -0.01557 |
| H | -1.34422 | -5.09000 | 0.00710  | -1.34410 | -5.09198 | 0.00801  | -1.33840 | -5.14270 | 0.01558  |
| H | -5.08633 | -1.34457 | -0.12496 | -5.08822 | -1.34441 | -0.12418 | -5.13422 | -1.33907 | -0.17146 |
| H | -5.08633 | 1.34456  | -0.12495 | -5.08819 | 1.34452  | -0.12434 | -5.13422 | 1.33907  | -0.17146 |
| H | -1.34423 | 5.09000  | 0.00711  | -1.34397 | 5.09201  | 0.00785  | -1.33840 | 5.14270  | 0.01558  |
| H | 1.34423  | 5.09000  | -0.00677 | 1.34411  | 5.09197  | -0.00765 | 1.33840  | 5.14270  | -0.01557 |
| C | -3.50399 | -3.50147 | -0.02946 | -3.50445 | -3.50190 | -0.02929 | -3.51911 | -3.51414 | -0.02857 |
| C | -4.28241 | -3.74788 | 1.11200  | -4.28485 | -3.74703 | 1.11111  | -4.34805 | -3.71976 | 1.08572  |
| C | -3.73924 | -4.26237 | -1.18503 | -3.73781 | -4.26418 | -1.18436 | -3.70839 | -4.31488 | -1.16618 |
| C | -5.27282 | -4.73373 | 1.09973  | -5.27519 | -4.73292 | 1.09834  | -5.34037 | -4.70332 | 1.06494  |
| H | -4.10385 | -3.16318 | 2.00992  | -4.10783 | -3.16128 | 2.00866  | -4.20626 | -3.10516 | 1.97006  |
| C | -4.73039 | -5.24739 | -1.19984 | -4.72891 | -5.24922 | -1.19972 | -4.70171 | -5.29728 | -1.18980 |
| H | -3.14205 | -4.07407 | -2.07267 | -3.13914 | -4.07689 | -2.07124 | -3.07403 | -4.15837 | -2.03391 |

|    |          |          |          |          |          |          |          |          |          |
|----|----------|----------|----------|----------|----------|----------|----------|----------|----------|
| C  | -5.49993 | -5.48629 | -0.05685 | -5.50034 | -5.48685 | -0.05773 | -5.52058 | -5.49510 | -0.07354 |
| H  | -5.86432 | -4.91449 | 1.99295  | -5.86820 | -4.91268 | 1.99077  | -5.96994 | -4.85189 | 1.93786  |
| H  | -4.90237 | -5.82516 | -2.10371 | -4.89936 | -5.82807 | -2.10319 | -4.83735 | -5.90480 | -2.08026 |
| H  | -6.27011 | -6.25227 | -0.06743 | -6.27049 | -6.25287 | -0.06871 | -6.29249 | -6.25922 | -0.09090 |
| C  | 3.50400  | -3.50146 | 0.02946  | 3.50437  | -3.50199 | 0.02929  | 3.51911  | -3.51414 | 0.02857  |
| C  | 3.73945  | -4.26214 | 1.18512  | 3.73781  | -4.26415 | 1.18442  | 3.70839  | -4.31487 | 1.16618  |
| C  | 4.28221  | -3.74807 | -1.11209 | 4.28464  | -3.74725 | -1.11116 | 4.34804  | -3.71977 | -1.08572 |
| C  | 4.73060  | -5.24717 | 1.19994  | 4.72889  | -5.24922 | 1.19977  | 4.70172  | -5.29727 | 1.18980  |
| H  | 3.14241  | -4.07369 | 2.07284  | 3.13925  | -4.07676 | 2.07133  | 3.07404  | -4.15836 | 2.03392  |
| C  | 5.27263  | -4.73392 | -1.09982 | 5.27496  | -4.73317 | -1.09839 | 5.34036  | -4.70333 | -1.06495 |
| H  | 4.10350  | -3.16352 | -2.01008 | 4.10754  | -3.16159 | -2.00876 | 4.20624  | -3.10518 | -1.97007 |
| C  | 5.49994  | -5.48627 | 0.05685  | 5.50020  | -5.48698 | 0.05774  | 5.52058  | -5.49510 | 0.07354  |
| H  | 4.90273  | -5.82478 | 2.10387  | 4.89942  | -5.82798 | 2.10329  | 4.83736  | -5.90479 | 2.08027  |
| H  | 5.86398  | -4.91484 | -1.99311 | 5.86787  | -4.91303 | -1.99086 | 5.96992  | -4.85190 | -1.93786 |
| H  | 6.27013  | -6.25225 | 0.06744  | 6.27033  | -6.25302 | 0.06872  | 6.29248  | -6.25922 | 0.09090  |
| C  | 3.50399  | 3.50147  | 0.02943  | 3.50444  | 3.50189  | 0.02965  | 3.51911  | 3.51414  | 0.02857  |
| C  | 3.73945  | 4.26216  | 1.18509  | 3.73780  | 4.26397  | 1.18485  | 3.70840  | 4.31487  | 1.16618  |
| C  | 4.28220  | 3.74808  | -1.11212 | 4.28481  | 3.74724  | -1.11072 | 4.34804  | 3.71977  | -1.08572 |
| C  | 4.73060  | 5.24719  | 1.19989  | 4.72888  | 5.24903  | 1.20037  | 4.70172  | 5.29727  | 1.18980  |
| H  | 3.14242  | 4.07371  | 2.07281  | 3.13915  | 4.07652  | 2.07170  | 3.07404  | 4.15836  | 2.03392  |
| C  | 5.27261  | 4.73392  | -1.09986 | 5.27514  | 4.73315  | -1.09779 | 5.34036  | 4.70332  | -1.06495 |
| H  | 4.10348  | 3.16352  | -2.01011 | 4.10779  | 3.16165  | -2.00837 | 4.20624  | 3.10518  | -1.97007 |
| C  | 5.49993  | 5.48628  | 0.05681  | 5.50030  | 5.48687  | 0.05841  | 5.52058  | 5.49510  | 0.07354  |
| H  | 4.90273  | 5.82481  | 2.10383  | 4.89934  | 5.82772  | 2.10394  | 4.83736  | 5.90478  | 2.08027  |
| H  | 5.86396  | 4.91484  | -1.99315 | 5.86814  | 4.91307  | -1.99020 | 5.96992  | 4.85190  | -1.93786 |
| H  | 6.27011  | 6.25226  | 0.06738  | 6.27043  | 6.25290  | 0.06952  | 6.29249  | 6.25922  | 0.09090  |
| C  | -3.50400 | 3.50146  | -0.02943 | -3.50436 | 3.50198  | -0.02965 | -3.51911 | 3.51414  | -0.02857 |
| C  | -4.28241 | 3.74786  | 1.11203  | -4.28484 | 3.74723  | 1.11066  | -4.34805 | 3.71976  | 1.08572  |
| C  | -3.73926 | 4.26236  | -1.18499 | -3.73758 | 4.26419  | -1.18480 | -3.70839 | 4.31488  | -1.16618 |
| C  | -5.27283 | 4.73371  | 1.09977  | -5.27514 | 4.73316  | 1.09774  | -5.34037 | 4.70332  | 1.06494  |
| H  | -4.10385 | 3.16315  | 2.00995  | -4.10791 | 3.16154  | 2.00828  | -4.20626 | 3.10517  | 1.97006  |
| C  | -4.73041 | 5.24738  | -1.19980 | -4.72864 | 5.24927  | -1.20031 | -4.70171 | 5.29728  | -1.18980 |
| H  | -3.14207 | 4.07407  | -2.07264 | -3.13885 | 4.07681  | -2.07161 | -3.07402 | 4.15837  | -2.03391 |
| C  | -5.49995 | 5.48627  | -0.05680 | -5.50016 | 5.48701  | -0.05841 | -5.52058 | 5.49510  | -0.07354 |
| H  | -5.86433 | 4.91446  | 1.99299  | -5.86822 | 4.91301  | 1.99011  | -5.96994 | 4.85189  | 1.93786  |
| H  | -4.90240 | 5.82516  | -2.10366 | -4.89900 | 5.82806  | -2.10384 | -4.83735 | 5.90480  | -2.08026 |
| H  | -6.27014 | 6.25225  | -0.06737 | -6.27028 | 6.25306  | -0.06951 | -6.29248 | 6.25922  | -0.09090 |
| Mn | 0.00000  | 0.00000  | 0.00000  | 0.00000  | -0.00001 | 0.00000  | 0.00000  | 0.00000  | 0.00000  |

### MnTPP, total charge 1

|   | Singlet  |          |          | Triplet  |          |          | Quintet  |          |          |
|---|----------|----------|----------|----------|----------|----------|----------|----------|----------|
| N | -1.96781 | -0.00001 | -0.00463 | 2.03383  | 0.00000  | -0.04431 | -1.99924 | 0.00007  | -0.01067 |
| N | -0.00001 | 1.96828  | -0.00021 | 0.00000  | -2.03438 | 0.00000  | 0.00001  | 1.99968  | 0.00000  |
| N | 1.96781  | 0.00000  | 0.00503  | -2.03383 | 0.00000  | 0.04432  | 1.99924  | 0.00006  | 0.01067  |
| N | 0.00000  | -1.96829 | -0.00021 | 0.00000  | 2.03438  | 0.00000  | -0.00001 | -1.99946 | 0.00000  |
| C | -2.82923 | -1.10763 | 0.02157  | 2.86526  | 1.09927  | 0.00759  | -2.84253 | -1.11070 | 0.01931  |
| C | -4.18947 | -0.68462 | 0.08081  | 4.23841  | 0.68275  | 0.11325  | -4.20785 | -0.68205 | 0.07658  |
| C | -4.18947 | 0.68460  | 0.08083  | 4.23841  | -0.68275 | 0.11327  | -4.20785 | 0.68246  | 0.07425  |
| C | -2.82923 | 1.10762  | 0.02160  | 2.86526  | -1.09927 | 0.00762  | -2.84252 | 1.11092  | 0.01596  |
| C | -2.44603 | 2.44619  | 0.01426  | 2.44834  | -2.44883 | 0.01322  | -2.44907 | 2.44934  | 0.01115  |
| C | -1.10773 | 2.83013  | 0.00251  | 1.09949  | -2.86743 | 0.00659  | -1.11089 | 2.84344  | 0.00206  |
| C | -0.68459 | 4.19160  | -0.00558 | 0.68268  | -4.24445 | -0.00650 | -0.68222 | 4.20992  | -0.00489 |
| C | 0.68458  | 4.19160  | 0.00365  | -0.68268 | -4.24445 | 0.00647  | 0.68225  | 4.20992  | 0.00479  |
| C | 1.10771  | 2.83013  | -0.00337 | -1.09950 | -2.86743 | -0.00660 | 1.11091  | 2.84343  | -0.00210 |
| C | 2.44602  | 2.44618  | -0.01427 | -2.44835 | -2.44882 | -0.01322 | 2.44908  | 2.44933  | -0.01115 |
| C | 2.82924  | 1.10763  | -0.02075 | -2.86526 | -1.09927 | -0.00761 | 2.84253  | 1.11090  | -0.01592 |
| C | 4.18953  | 0.68461  | -0.07891 | -4.23842 | -0.68274 | -0.11325 | 4.20786  | 0.68243  | -0.07415 |
| C | 4.18954  | -0.68460 | -0.07889 | -4.23842 | 0.68276  | -0.11322 | 4.20785  | -0.68208 | -0.07648 |
| C | 2.82924  | -1.10762 | -0.02072 | -2.86526 | 1.09928  | -0.00758 | 2.84252  | -1.11072 | -0.01927 |
| C | 2.44603  | -2.44617 | -0.01421 | -2.44834 | 2.44883  | -0.01315 | 2.44904  | -2.44913 | -0.01695 |
| C | 1.10772  | -2.83013 | -0.00334 | -1.09949 | 2.86743  | -0.00656 | 1.11088  | -2.84321 | -0.00545 |
| C | 0.68460  | -4.19160 | 0.00367  | -0.68267 | 4.24445  | 0.00650  | 0.68224  | -4.20969 | 0.00246  |
| C | -0.68457 | -4.19161 | -0.00560 | 0.68268  | 4.24445  | -0.00653 | -0.68226 | -4.20969 | -0.00257 |
| C | -1.10772 | -2.83014 | 0.00248  | 1.09950  | 2.86743  | 0.00655  | -1.11089 | -2.84320 | 0.00541  |
| C | -2.44602 | -2.44620 | 0.01421  | 2.44835  | 2.44883  | 0.01315  | -2.44906 | -2.44912 | 0.01695  |
| H | -5.03908 | -1.34933 | 0.12953  | 5.08789  | 1.34191  | 0.20572  | -5.05608 | -1.34815 | 0.12552  |
| H | -5.03909 | 1.34930  | 0.12957  | 5.08788  | -1.34191 | 0.20577  | -5.05608 | 1.34873  | 0.12096  |
| H | -1.34896 | 5.04278  | -0.01428 | 1.34104  | -5.09921 | -0.02540 | -1.34808 | 5.05967  | -0.01334 |
| H | 1.34896  | 5.04278  | 0.01172  | -1.34104 | -5.09921 | 0.02536  | 1.34811  | 5.05966  | 0.01320  |
| H | 5.03917  | 1.34933  | -0.12703 | -5.08789 | -1.34190 | -0.20573 | 5.05609  | 1.34870  | -0.12082 |

|    |          |          |          |          |          |          |          |          |          |
|----|----------|----------|----------|----------|----------|----------|----------|----------|----------|
| H  | 5.03918  | -1.34931 | -0.12699 | -5.08789 | 1.34192  | -0.20568 | 5.05607  | -1.34818 | -0.12537 |
| H  | 1.34898  | -5.04278 | 0.01177  | -1.34103 | 5.09921  | 0.02541  | 1.34814  | -5.05943 | 0.00865  |
| H  | -1.34893 | -5.04279 | -0.01433 | 1.34104  | 5.09921  | -0.02545 | -1.34817 | -5.05942 | -0.00880 |
| C  | 3.50496  | 3.50234  | -0.02563 | -3.50446 | -3.49833 | -0.03582 | 3.50818  | 3.50570  | -0.02244 |
| C  | 4.24719  | 3.77269  | 1.13395  | -4.39130 | -3.63526 | 1.04627  | 4.26291  | 3.76323  | 1.13194  |
| C  | 3.76791  | 4.23063  | -1.19577 | -3.63104 | -4.36012 | -1.13920 | 3.75853  | 4.24684  | -1.18719 |
| C  | 5.23615  | 4.75979  | 1.12355  | -5.37718 | -4.62318 | 1.02892  | 5.25166  | 4.75041  | 1.12179  |
| H  | 4.04340  | 3.21357  | 2.04295  | -4.29401 | -2.97652 | 1.90414  | 4.06923  | 3.19391  | 2.03673  |
| C  | 4.76044  | 5.21407  | -1.20570 | -4.63072 | -5.33393 | -1.16171 | 4.75107  | 5.23016  | -1.19703 |
| H  | 3.19902  | 4.02000  | -2.09713 | -2.95609 | -4.25179 | -1.98300 | 3.17970  | 4.04655  | -2.08448 |
| C  | 5.49502  | 5.48102  | -0.04613 | -5.50218 | -5.47120 | -0.07630 | 5.49809  | 5.48440  | -0.04260 |
| H  | 5.80146  | 4.96531  | 2.02757  | -6.04669 | -4.72982 | 1.87699  | 5.82658  | 4.94600  | 2.02193  |
| H  | 4.96007  | 5.76853  | -2.11772 | -4.72896 | -5.98383 | -2.02590 | 4.94094  | 5.79449  | -2.10506 |
| H  | 6.26488  | 6.24658  | -0.05405 | -6.27447 | -6.23412 | -0.09195 | 6.26790  | 6.24999  | -0.05040 |
| C  | -3.50498 | 3.50233  | 0.02563  | 3.50446  | -3.49834 | 0.03582  | -3.50816 | 3.50573  | 0.02244  |
| C  | -3.76674 | 4.23183  | 1.19529  | 3.63102  | -4.36014 | 1.13919  | -3.75842 | 4.24695  | 1.18716  |
| C  | -4.24843 | 3.77147  | -1.13346 | 4.39131  | -3.63525 | -1.04626 | -4.26297 | 3.76318  | -1.13190 |
| C  | -4.75929 | 5.21525  | 1.20522  | 4.63070  | -5.33395 | 1.16170  | -4.75095 | 5.23028  | 1.19700  |
| H  | -3.19692 | 4.02215  | 2.09628  | 2.95606  | -4.25181 | 1.98299  | -3.17953 | 4.04672  | 2.08442  |
| C  | -5.23738 | 4.75856  | -1.12306 | 5.37718  | -4.62317 | -1.02891 | -5.25171 | 4.75036  | -1.12175 |
| H  | -4.94556 | 3.21141  | -2.04209 | 4.29403  | -2.97650 | -1.90412 | -4.06936 | 3.19379  | -2.03667 |
| C  | -5.49507 | 5.48099  | 0.04614  | 5.50217  | -5.47120 | 0.07630  | -5.49806 | 5.48444  | 0.04260  |
| H  | -4.95800 | 5.77064  | 2.11689  | 4.72892  | -5.98386 | 2.02588  | -4.94076 | 5.79467  | 2.10500  |
| H  | -5.80362 | 4.96315  | -2.02671 | 6.04671  | -4.72981 | -1.87697 | -5.82669 | 4.94589  | -2.02187 |
| H  | -6.26493 | 6.24654  | 0.05407  | 6.27446  | -6.23413 | 0.09195  | -6.26786 | 6.25003  | 0.05040  |
| C  | -3.50496 | -3.50235 | 0.02553  | 3.50447  | 3.49833  | 0.03570  | -3.50796 | -3.50563 | 0.03232  |
| C  | -3.76675 | -4.23187 | 1.19517  | 3.63107  | 4.36016  | 1.13905  | -3.75554 | -4.24476 | 1.19894  |
| C  | -4.24839 | -3.77146 | -1.13358 | 4.39129  | 3.63521  | -1.04641 | -4.26506 | -3.76553 | -1.11997 |
| C  | -4.75930 | -5.21529 | 1.20507  | 4.63075  | 5.33396  | 1.16150  | -4.74775 | -5.22837 | 1.21272  |
| H  | -3.19695 | -4.02220 | 2.09617  | 2.95614  | 4.25186  | 1.98287  | -3.17480 | -4.04270 | 2.09461  |
| C  | -5.23734 | -4.75856 | -1.12322 | 5.37717  | 4.62313  | -1.02911 | -5.25348 | -4.75299 | -1.10589 |
| H  | -4.04550 | -3.21139 | -2.04220 | 4.29398  | 2.97644  | -1.90425 | -4.07347 | -3.19784 | -2.02623 |
| C  | -5.49505 | -5.48101 | 0.04596  | 5.50220  | 5.47119  | 0.07607  | -5.49719 | -5.48493 | 0.06037  |
| H  | -4.95803 | -5.77070 | 2.11671  | 4.72901  | 5.98389  | 2.02567  | -4.93548 | -5.79112 | 2.12217  |
| H  | -5.80356 | -4.96313 | -2.02689 | 6.04667  | 4.72974  | -1.87720 | -5.83026 | -4.95042 | -2.00445 |
| H  | -6.26491 | -6.24656 | 0.05386  | 6.27449  | 6.23410  | 0.09168  | -6.26675 | -6.25074 | 0.07122  |
| C  | 3.50498  | -3.50233 | -0.02553 | -3.50446 | 3.49834  | -0.03570 | 3.50794  | -3.50566 | -0.03232 |
| C  | 4.24719  | -3.77265 | 1.13407  | -4.39127 | 3.63523  | 1.04642  | 4.26496  | -3.76564 | 1.12000  |
| C  | 3.76796  | -4.23064 | -1.19566 | -3.63108 | 4.36015  | -1.13906 | 3.75560  | -4.24470 | -1.19898 |
| C  | 5.23615  | -4.75974 | 1.12371  | -5.37715 | 4.62315  | 1.02912  | 5.25337  | -4.75311 | 1.10593  |
| H  | 4.04337  | -3.21351 | 2.04306  | -4.29395 | 2.97647  | 1.90426  | 4.07330  | -3.19801 | 2.02629  |
| C  | 4.76050  | -5.21407 | -1.20554 | -4.63076 | 5.33396  | -1.16151 | 4.74780  | -5.22832 | -1.21275 |
| H  | 3.19909  | -4.02003 | -2.09703 | -2.95615 | 4.25184  | -1.98288 | 3.17492  | -4.04258 | -2.09467 |
| C  | 5.49506  | -5.48099 | -0.04595 | -5.50219 | 5.47120  | -0.07607 | 5.49715  | -5.48497 | -0.06037 |
| H  | 5.80145  | -4.96524 | 2.02774  | -6.04664 | 4.72977  | 1.87721  | 5.83008  | -4.95060 | 2.00451  |
| H  | 4.96015  | -5.76854 | -2.11755 | -4.72902 | 5.98388  | -2.02568 | 4.93558  | -5.79100 | -2.12223 |
| H  | 6.26491  | -6.24655 | -0.05384 | -6.27448 | 6.23411  | -0.09168 | 6.26670  | -6.25078 | -0.07122 |
| Mn | 0.00000  | 0.00000  | 0.00000  | 0.00000  | 0.00000  | 0.00000  | 0.00000  | 0.00009  | 0.00000  |

### H-MnTPP, total charge 0

|   | Singlet  |          |          | Triplet  |          |          | Quintet  |          |          |
|---|----------|----------|----------|----------|----------|----------|----------|----------|----------|
| N | 0.00297  | 1.97922  | -0.02098 | -0.00019 | 2.01515  | -0.02610 | -0.48327 | -2.03686 | -0.13110 |
| N | 2.03504  | -0.00291 | 0.05970  | 2.01285  | 0.00019  | -0.03039 | -1.97261 | 0.46453  | 0.05031  |
| N | -0.00280 | -1.97921 | -0.02094 | 0.00019  | -2.01514 | -0.02610 | 0.48076  | 2.03882  | -0.08291 |
| N | -2.02952 | 0.00293  | -0.03708 | -2.01285 | -0.00019 | -0.03039 | 1.97115  | -0.46291 | 0.07171  |
| C | -1.10443 | 2.82253  | 0.05055  | -1.10245 | 2.84843  | 0.02649  | 0.40443  | -3.08278 | -0.09756 |
| C | -0.67944 | 4.18399  | 0.19591  | -0.68177 | 4.22367  | 0.13553  | -0.32407 | -4.33565 | -0.05893 |
| C | 0.68681  | 4.18094  | 0.19975  | 0.68098  | 4.22379  | 0.13558  | -1.65239 | -4.02218 | -0.05383 |
| C | 1.10907  | 2.81790  | 0.04974  | 1.10192  | 2.84864  | 0.02649  | -1.74427 | -2.57581 | -0.08913 |
| C | 2.45623  | 2.42794  | -0.00122 | 2.44085  | 2.44172  | -0.02156 | -2.94102 | -1.83467 | -0.01572 |
| C | 2.86868  | 1.09661  | -0.03812 | 2.84608  | 1.10237  | -0.07832 | -3.02965 | -0.42907 | 0.04182  |
| C | 4.24110  | 0.67327  | -0.21087 | 4.22034  | 0.68177  | -0.19982 | -4.27128 | 0.30817  | 0.03098  |
| C | 4.23912  | -0.68566 | -0.21046 | 4.22046  | -0.68098 | -0.19992 | -3.95653 | 1.63658  | 0.03528  |
| C | 2.86548  | -1.10491 | -0.03741 | 2.84629  | -1.10184 | -0.07832 | -2.51669 | 1.73733  | 0.03231  |
| C | 2.44915  | -2.43501 | 0.00005  | 2.44130  | -2.44127 | -0.02156 | -1.80891 | 2.95355  | -0.02890 |
| C | 1.10084  | -2.82106 | 0.05051  | 1.10245  | -2.84843 | 0.02650  | -0.40847 | 3.08322  | -0.08720 |
| C | 0.67455  | -4.18288 | 0.20031  | 0.68177  | -4.22366 | 0.13553  | 0.31659  | 4.33728  | -0.13323 |
| C | -0.69170 | -4.18199 | 0.19555  | -0.68098 | -4.22379 | 0.13558  | 1.64593  | 4.02708  | -0.12497 |
| C | -1.11266 | -2.81932 | 0.04990  | -1.10192 | -2.84864 | 0.02650  | 1.74124  | 2.58047  | -0.09128 |
| C | -2.45207 | -2.42503 | -0.02855 | -2.44085 | -2.44172 | -0.02156 | 2.93731  | 1.83936  | -0.03286 |

|    |          |          |          |          |          |          |          |          |          |
|----|----------|----------|----------|----------|----------|----------|----------|----------|----------|
| C  | -2.86037 | -1.09016 | -0.10970 | -2.84608 | -1.10237 | -0.07832 | 3.02539  | 0.43250  | 0.02317  |
| C  | -4.23823 | -0.67298 | -0.27691 | -4.22034 | -0.68177 | -0.19983 | 4.26536  | -0.30186 | -0.05812 |
| C  | -4.23626 | 0.68541  | -0.27642 | -4.22046 | 0.68098  | -0.19991 | 3.95223  | -1.63059 | -0.06378 |
| C  | -2.85719 | 1.09847  | -0.10898 | -2.84629 | 1.10184  | -0.07832 | 2.51466  | -1.73472 | 0.01534  |
| C  | -2.44500 | 2.43212  | -0.02733 | -2.44130 | 2.44127  | -0.02157 | 1.80648  | -2.95340 | -0.04037 |
| H  | -1.33947 | 5.03231  | 0.30010  | -1.34550 | 5.07201  | 0.21359  | 0.12165  | -5.31859 | -0.01262 |
| H  | 1.34976  | 5.02606  | 0.31123  | 1.34455  | 5.07226  | 0.21368  | -2.49045 | -4.70205 | -0.00378 |
| H  | 5.08253  | 1.33798  | -0.33910 | 5.06749  | 1.34584  | -0.28750 | -5.25629 | -0.13370 | 0.00327  |
| H  | 5.07861  | -1.35290 | -0.33827 | 5.06773  | -1.34488 | -0.28768 | -4.63756 | 2.47484  | 0.02246  |
| H  | 1.33500  | -5.02989 | 0.31230  | 1.34550  | -5.07201 | 0.21359  | -0.13342 | 5.31932  | -0.15732 |
| H  | -1.35424 | -5.02840 | 0.29931  | -1.34455 | -5.07225 | 0.21368  | 2.48281  | 4.71014  | -0.13176 |
| H  | -5.07913 | -1.33997 | -0.39641 | -5.06749 | -1.34584 | -0.28753 | 5.24638  | 0.14264  | -0.13758 |
| H  | -5.07522 | 1.35493  | -0.39545 | -5.06773 | 1.34488  | -0.28766 | 4.63196  | -2.46530 | -0.14974 |
| C  | 3.49276  | -3.50542 | -0.01809 | 3.50122  | -3.49723 | -0.01262 | -2.61223 | 4.21878  | -0.03807 |
| C  | 3.62029  | -4.36457 | -1.12125 | 3.68530  | -4.33606 | -1.12285 | -2.70141 | 5.01289  | 1.11507  |
| C  | 4.36744  | -3.66703 | 1.06816  | 4.33038  | -3.66609 | 1.10729  | -3.28046 | 4.63358  | -1.19994 |
| C  | 4.59989  | -5.36057 | -1.13927 | 4.67687  | -5.32059 | -1.11492 | -3.44474 | 6.19645  | 1.10790  |
| H  | 2.94920  | -4.24234 | -1.96659 | 3.04850  | -4.20817 | -1.99353 | -2.18625 | 4.69574  | 2.01736  |
| C  | 5.34515  | -4.66511 | 1.05342  | 5.32006  | -4.65245 | 1.11822  | -4.02303 | 5.81748  | -1.20924 |
| H  | 4.27182  | -3.00734 | 1.92577  | 4.19065  | -3.02141 | 1.97027  | -3.21187 | 4.02379  | -2.09639 |
| C  | 5.46479  | -5.51453 | -0.05103 | 5.49669  | -5.48221 | 0.00646  | -4.10762 | 6.60202  | -0.05466 |
| H  | 4.68881  | -6.01338 | -2.00314 | 4.80970  | -5.95862 | -1.98418 | -3.50655 | 6.79930  | 2.00960  |
| H  | 6.01052  | -4.78011 | 1.90452  | 5.95041  | -4.77352 | 1.99476  | -4.53260 | 6.12682  | -2.11754 |
| H  | 6.22567  | -6.28973 | -0.06379 | 6.26678  | -6.24832 | 0.01383  | -4.68498 | 7.52215  | -0.06108 |
| C  | 3.50291  | 3.49533  | -0.02023 | 3.50059  | 3.49786  | -0.01259 | -4.22275 | -2.60686 | 0.00897  |
| C  | 4.37853  | 3.65491  | 1.06557  | 4.32973  | 3.66682  | 1.10732  | -5.01426 | -2.64297 | 1.16794  |
| C  | 3.63240  | 4.35365  | -1.12381 | 3.68453  | 4.33675  | -1.12280 | -4.65177 | -3.31537 | -1.12440 |
| C  | 5.35907  | 4.65018  | 1.04997  | 5.31925  | 4.65334  | 1.11827  | -6.20692 | -3.37024 | 1.19352  |
| H  | 4.28139  | 2.99587  | 1.92350  | 4.19011  | 3.02208  | 1.97027  | -4.68525 | -2.10083 | 2.04984  |
| C  | 4.61483  | 5.34684  | -1.14269 | 4.67595  | 5.32143  | -1.11485 | -5.84585 | -4.04069 | -1.10132 |
| H  | 2.96060  | 4.23297  | -1.96880 | 3.04775  | 4.20878  | -1.99348 | -4.04504 | -3.28964 | -2.02504 |
| C  | 5.48065  | 5.49879  | -0.05490 | 5.49574  | 5.48316  | 0.00653  | -6.62686 | -4.07081 | 0.05829  |
| H  | 6.02514  | 4.76365  | 1.90073  | 5.94959  | 4.77448  | 1.99481  | -6.80526 | -3.39173 | 2.10007  |
| H  | 4.70524  | 5.99902  | -2.00688 | 4.80867  | 5.95951  | -1.98409 | -6.16607 | -4.57943 | -1.98878 |
| H  | 6.24374  | 6.27181  | -0.06832 | 6.26572  | 6.24939  | 0.01392  | -7.55457 | -4.63560 | 0.07731  |
| C  | -3.49497 | 3.49720  | -0.02078 | -3.50122 | 3.49723  | -0.01262 | 2.61086  | -4.21486 | -0.04064 |
| C  | -4.35851 | 3.63881  | 1.07679  | -4.33039 | 3.66608  | 1.10729  | 3.34733  | -4.59355 | 1.09328  |
| C  | -3.63870 | 4.36905  | -1.11150 | -3.68530 | 4.33607  | -1.12285 | 2.63896  | -5.04539 | -1.17226 |
| C  | -5.34164 | 4.63160  | 1.08546  | -5.32006 | 4.65244  | 1.11822  | 4.09332  | -5.77476 | 1.09651  |
| H  | -4.25068 | 2.96766  | 1.92396  | -4.19065 | 3.02139  | 1.97026  | 3.32624  | -3.95765 | 1.97362  |
| C  | -4.62441 | 5.35934  | -1.10623 | -4.67687 | 5.32059  | -1.11491 | 3.38767  | -6.22506 | -1.17186 |
| H  | -2.97595 | 4.26145  | -1.96536 | -3.04850 | 4.20818  | -1.99353 | 2.07433  | -4.75656 | -2.05407 |
| C  | -5.47807 | 5.49428  | -0.00675 | -5.49669 | 5.48221  | 0.00646  | 4.11656  | -6.59387 | -0.03682 |
| H  | -5.99872 | 4.73161  | 1.94484  | -5.95041 | 4.77350  | 1.99476  | 4.65310  | -6.05581 | 1.98418  |
| H  | -4.72649 | 6.02255  | -1.96066 | -4.80970 | 5.95863  | -1.98417 | 3.40320  | -6.85340 | -2.05802 |
| H  | -6.24352 | 6.26504  | -0.00136 | -6.26679 | 6.24832  | 0.01384  | 4.69753  | -7.51174 | -0.03538 |
| C  | -3.50507 | -3.48711 | -0.02293 | -3.50059 | -3.49786 | -0.01259 | 4.22246  | 2.60620  | -0.04560 |
| C  | -3.65071 | -4.35811 | -1.11408 | -3.68453 | -4.33675 | -1.12280 | 4.63231  | 3.29895  | -1.19568 |
| C  | -4.36955 | -3.62675 | 1.07416  | -4.32973 | -3.66682 | 1.10732  | 5.03968  | 2.64746  | 1.09515  |
| C  | -4.63922 | -5.34561 | -1.10971 | -4.67595 | -5.32143 | -1.11485 | 5.83169  | 4.01576  | -1.20591 |
| H  | -2.98723 | -4.25202 | -1.96756 | -3.04776 | -4.20877 | -1.99349 | 4.00687  | 3.26713  | -2.08322 |
| C  | -5.35548 | -4.61678 | 1.08193  | -5.31924 | -4.65334 | 1.11827  | 6.23779  | 3.36619  | 1.08739  |
| H  | -4.26024 | -2.95627 | 1.92167  | -4.19010 | -3.02209 | 1.97028  | 4.72681  | 2.11547  | 1.98904  |
| C  | -5.49379 | -5.47861 | -0.01071 | -5.49574 | -5.48316 | 0.00653  | 6.63778  | 4.05223  | -0.06377 |
| H  | -4.74273 | -6.00818 | -1.96447 | -4.80867 | -5.95951 | -1.98410 | 6.13673  | 4.54235  | -2.10591 |
| H  | -6.01326 | -4.71529 | 1.94094  | -5.94958 | -4.77449 | 1.99481  | 6.85631  | 3.39182  | 1.98019  |
| H  | -6.26142 | -6.24721 | -0.00603 | -6.26571 | -6.24939 | 0.01392  | 7.56973  | 4.61028  | -0.07078 |
| Mn | 0.03878  | -0.00004 | 0.20114  | 0.00000  | 0.00000  | 0.12702  | -0.00295 | -0.00106 | 0.33624  |
| H  | -0.44265 | 0.00109  | 1.62312  | 0.00000  | 0.00000  | 1.64943  | -0.02510 | -0.03864 | 1.91890  |

### NiTPP, total charge 0

|   | Singlet  |          | Triplet  |          |          | Quintet  |          |          |          |
|---|----------|----------|----------|----------|----------|----------|----------|----------|----------|
| N | 1.96544  | -0.07716 | 0.00685  | 2.03664  | 0.00000  | -0.02059 | 0.00059  | 2.04764  | -0.03226 |
| N | -0.06586 | -1.96980 | -0.00839 | 0.00000  | -2.03692 | 0.00000  | 2.05675  | -0.00059 | -0.00001 |
| N | -1.94908 | 0.06541  | 0.01149  | -2.03664 | 0.00000  | 0.02059  | -0.00059 | -2.04764 | 0.03226  |
| N | 0.07549  | 1.95153  | -0.00615 | 0.00000  | 2.03692  | 0.00000  | -2.05676 | 0.00059  | 0.00002  |
| C | 2.83954  | 0.95956  | 0.27665  | 2.86126  | 1.10402  | 0.01197  | -1.10043 | 2.87811  | 0.02069  |
| C | 4.19869  | 0.47758  | 0.30313  | 4.24265  | 0.68133  | 0.07611  | -0.69204 | 4.23426  | 0.11949  |



|   |          |          |          |          |          |          |          |          |          |
|---|----------|----------|----------|----------|----------|----------|----------|----------|----------|
| C | 4.15412  | -0.84418 | -0.01473 | 4.24265  | -0.68135 | 0.07610  | 0.69449  | 4.23385  | 0.11951  |
| C | 2.76318  | -1.18783 | -0.17897 | 2.86126  | -1.10403 | 0.01196  | 1.10209  | 2.87747  | 0.02071  |
| C | 2.31777  | -2.49430 | -0.38371 | 2.44452  | -2.44468 | 0.01281  | 2.46722  | 2.43871  | 0.01672  |
| C | 0.97482  | -2.84575 | -0.25186 | 1.10412  | -2.86213 | 0.00599  | 2.88549  | 1.10502  | 0.00981  |
| C | 0.50133  | -4.20815 | -0.23262 | 0.68134  | -4.24490 | -0.00128 | 4.27054  | 0.67860  | -0.00182 |
| C | -0.81912 | -4.16168 | 0.09039  | -0.68136 | -4.24490 | 0.00127  | 4.27014  | -0.68109 | 0.00172  |
| C | -1.17390 | -2.76830 | 0.19887  | -1.10413 | -2.86212 | -0.00599 | 2.88485  | -1.10669 | -0.00985 |
| C | -2.47623 | -2.31588 | 0.40665  | -2.44453 | -2.44467 | -0.01281 | 2.46581  | -2.44013 | -0.01673 |
| C | -2.82297 | -0.97263 | 0.26827  | -2.86126 | -1.10402 | -0.01195 | 1.10043  | -2.87811 | -0.02072 |
| C | -4.18674 | -0.50505 | 0.23499  | -4.24265 | -0.68133 | -0.07608 | 0.69203  | -4.23426 | -0.11952 |
| C | -4.14165 | 0.81599  | -0.08652 | -4.24265 | 0.68135  | -0.07609 | -0.69450 | -4.23385 | -0.11951 |
| C | -2.74858 | 1.16914  | -0.20876 | -2.86126 | 1.10403  | -0.01196 | -1.10210 | -2.87747 | -0.02069 |
| C | -2.30176 | 2.47316  | -0.42432 | -2.44452 | 2.44468  | -0.01281 | -2.46722 | -2.43871 | -0.01668 |
| C | -0.95962 | 2.82494  | -0.28376 | -1.10412 | 2.86213  | -0.00600 | -2.88550 | -1.10502 | -0.00979 |
| C | -0.47804 | 4.18394  | -0.30847 | -0.68134 | 4.24490  | 0.00126  | -4.27054 | -0.67860 | 0.00184  |
| C | 0.84211  | 4.14001  | 0.01704  | 0.68136  | 4.24490  | -0.00128 | -4.27015 | 0.68109  | -0.00173 |
| C | 1.18480  | 2.74961  | 0.18589  | 1.10413  | 2.86212  | 0.00599  | -2.88485 | 1.10669  | 0.00984  |
| C | 2.48909  | 2.30308  | 0.40399  | 2.44453  | 2.44467  | 0.01281  | -2.46581 | 2.44013  | 0.01670  |
| H | 5.06530  | 1.08228  | 0.52450  | 5.09374  | 1.34409  | 0.13017  | -1.34850 | 5.08749  | 0.19979  |
| H | 4.97465  | -1.54151 | -0.09771 | 5.09374  | -1.34411 | 0.13016  | 1.35146  | 5.08669  | 0.19982  |
| H | 1.11314  | -5.07842 | -0.41701 | 1.34373  | -5.09792 | -0.00763 | 5.12510  | 1.33843  | -0.01234 |
| H | -1.50444 | -4.98570 | 0.22203  | -1.34375 | -5.09792 | 0.00760  | 5.12431  | -1.34143 | 0.01220  |
| H | -5.05429 | -1.12407 | 0.41030  | -5.09375 | -1.34409 | -0.13013 | 1.34849  | -5.08748 | -0.19983 |
| H | -4.96458 | 1.50427  | -0.21080 | -5.09374 | 1.34411  | -0.13014 | -1.35146 | -5.08669 | -0.19981 |
| H | -1.08183 | 5.05005  | -0.53435 | -1.34373 | 5.09792  | 0.00760  | -5.12510 | -1.33843 | 0.01238  |
| H | 1.53865  | 4.96091  | 0.10277  | 1.34375  | 5.09792  | -0.00763 | -5.12431 | 1.34143  | -0.01221 |
| C | -3.56033 | -3.30573 | 0.69411  | -3.50477 | -3.50193 | -0.02932 | 3.51306  | -3.50246 | -0.03442 |
| C | -4.08819 | -3.41585 | 1.98917  | -4.28987 | -3.74316 | 1.10869  | 3.67976  | -4.35579 | 1.06900  |
| C | -4.07947 | -4.12314 | -0.32147 | -3.73381 | -4.26779 | -1.18290 | 4.34433  | -3.67297 | -1.15327 |
| C | -5.11072 | -4.32800 | 2.26521  | -5.28048 | -4.72876 | 1.09508  | 4.66399  | -5.34622 | 1.05900  |
| H | -3.69157 | -2.78301 | 2.77805  | -4.11636 | -3.15459 | 2.00507  | 3.03588  | -4.23277 | 1.93473  |
| C | -5.10198 | -5.03521 | -0.04720 | -4.72532 | -5.25239 | -1.19915 | 5.32245  | -4.67064 | -1.16760 |
| H | -3.67985 | -4.03516 | -1.32776 | -3.13150 | -4.08366 | -2.06795 | 4.21400  | -3.02272 | -2.01334 |
| C | -5.62002 | -5.14052 | 1.24765  | -5.50139 | -5.48616 | -0.05953 | 5.48737  | -5.50820 | -0.06038 |
| H | -5.50773 | -4.40349 | 3.27368  | -5.87706 | -4.90547 | 1.98573  | 4.78725  | -5.99123 | 1.92445  |
| H | -5.49552 | -5.65949 | -0.84456 | -4.89243 | -5.83388 | -2.10154 | 5.95304  | -4.79352 | -2.04366 |
| H | -6.41517 | -5.84912 | 1.46134  | -6.27181 | -6.25189 | -0.07119 | 6.24987  | -6.28180 | -0.06973 |
| C | 3.33486  | -3.55541 | -0.65736 | 3.50476  | -3.50195 | 0.02932  | 3.51504  | 3.50048  | 0.03441  |
| C | 3.67691  | -4.50188 | 0.32112  | 3.73378  | -4.26782 | 1.18289  | 4.34636  | 3.67058  | 1.15329  |
| C | 3.98294  | -3.60379 | -1.90118 | 4.28987  | -3.74315 | -1.10869 | 3.68217  | 4.35374  | -1.06899 |
| C | 4.64172  | -5.47828 | 0.06026  | 4.72529  | -5.25242 | 1.19914  | 5.32498  | 4.66776  | 1.16764  |
| H | 3.18644  | -4.46246 | 1.28948  | 3.13146  | -4.08370 | 2.06793  | 4.21565  | 3.02043  | 2.01337  |
| C | 4.94643  | -4.58128 | -2.16447 | 5.28048  | -4.72876 | -1.09507 | 4.66690  | 5.34367  | -1.05897 |
| H | 3.72494  | -2.87118 | -2.66062 | 4.11638  | -3.15458 | -2.00505 | 3.03822  | 4.23107  | -1.93472 |
| C | 5.27840  | -5.52157 | -1.18427 | 5.50137  | -5.48618 | 0.05953  | 5.49035  | 5.50522  | 0.06042  |
| H | 4.89837  | -6.20116 | 0.82964  | 4.89238  | -5.83393 | 2.10153  | 5.95560  | 4.79034  | 2.04372  |
| H | 5.43614  | -4.60785 | -3.13390 | 5.87707  | -4.90546 | -1.98571 | 4.79049  | 5.98863  | -1.92441 |
| H | 6.02825  | -6.28077 | -1.38763 | 6.27179  | -6.25191 | 0.07119  | 6.25324  | 6.27845  | 0.06978  |
| C | 3.54799  | 3.31793  | 0.69160  | 3.50477  | 3.50194  | 0.02933  | -3.51306 | 3.50247  | 0.03435  |
| C | 3.56558  | 3.98573  | 1.92598  | 3.73379  | 4.26780  | 1.18291  | -4.34434 | 3.67300  | 1.15319  |
| C | 4.52479  | 3.63799  | -0.26443 | 4.28989  | 3.74314  | -1.10867 | -3.67975 | 4.35577  | -1.06909 |
| C | 4.54205  | 4.94656  | 2.20199  | 4.72530  | 5.25240  | 1.19916  | -5.32245 | 4.67067  | 1.16749  |
| H | 2.81012  | 3.74443  | 2.66829  | 3.13147  | 4.08368  | 2.06795  | -4.21401 | 3.02277  | 2.01327  |
| C | 5.50001  | 4.60044  | 0.00899  | 5.28050  | 4.72874  | -1.09505 | -4.66397 | 5.34620  | -1.05912 |
| H | 4.50969  | 3.13231  | -1.22559 | 4.11640  | 3.15457  | -2.00504 | -3.03586 | 4.23273  | -1.93481 |
| C | 5.51228  | 5.25664  | 1.24401  | 5.50139  | 5.48616  | 0.05955  | -5.48736 | 5.50821  | 0.06026  |
| H | 4.54468  | 5.45115  | 3.16412  | 4.89240  | 5.83391  | 2.10155  | -5.95305 | 4.79358  | 2.04354  |
| H | 6.26431  | 4.84002  | -0.74334 | 5.87709  | 4.90544  | -1.98569 | -4.78722 | 5.99119  | -1.92458 |
| H | 6.27070  | 6.00455  | 1.45723  | 6.27181  | 6.25189  | 0.07122  | -6.24986 | 6.28181  | 0.06958  |
| C | -3.31292 | 3.53106  | -0.72878 | -3.50476 | 3.50195  | -0.02933 | -3.51504 | -3.50048 | -0.03434 |
| C | -3.95491 | 3.55300  | -1.97664 | -4.28986 | 3.74317  | 1.10868  | -3.68214 | -4.35373 | 1.06907  |
| C | -3.65323 | 4.50379  | 0.22428  | -3.73379 | 4.26780  | -1.18292 | -4.34638 | -3.67060 | -1.15320 |
| C | -4.91114 | 4.52946  | -2.26830 | -5.28047 | 4.72878  | 1.09506  | -4.66687 | -5.34367 | 1.05909  |
| H | -3.69763 | 2.80076  | -2.71685 | -4.11636 | 3.15461  | 2.00506  | -3.03818 | -4.23105 | 1.93479  |
| C | -4.61083 | 5.47926  | -0.06501 | -4.72530 | 5.25240  | -1.19917 | -5.32500 | -4.66778 | -1.16752 |
| H | -3.16676 | 4.48575  | 1.19527  | -3.13149 | 4.08366  | -2.06796 | -4.21570 | -3.02045 | -2.01329 |
| C | -5.24175 | 5.49562  | -1.31307 | -5.50137 | 5.48618  | -0.05955 | -5.49035 | -5.50523 | -0.06029 |
| H | -5.39605 | 4.53527  | -3.24047 | -5.87704 | 4.90549  | 1.98571  | -4.79044 | -5.98862 | 1.92454  |
| H | -4.86619 | 6.22268  | 0.68499  | -4.89241 | 5.83389  | -2.10156 | -5.95564 | -4.79037 | -2.04358 |
| H | -5.98596 | 6.25412  | -1.53857 | -6.27179 | 6.25191  | -0.07122 | -6.25323 | -6.27846 | -0.06962 |

Ni 0.00666 -0.00770 0.00088 0.00000 0.00000 0.00000 0.00000 0.00000 0.00000

**NiTPP, total charge 1**

|   | Doublet  |          |          | Quartet  |          |          | Sextet   |          |          |
|---|----------|----------|----------|----------|----------|----------|----------|----------|----------|
| N | 1.27603  | 1.52398  | -0.19534 | 2.04309  | 0.00000  | -0.05232 | 2.04157  | -0.00023 | -0.04180 |
| N | 1.42591  | -1.20183 | 0.03024  | 0.00000  | -2.04364 | 0.00000  | -0.00022 | -2.04455 | 0.00000  |
| N | -1.30158 | -1.36160 | 0.03473  | -2.04309 | 0.00000  | 0.05232  | -2.04157 | 0.00023  | 0.04181  |
| N | -1.45044 | 1.37746  | -0.19744 | 0.00000  | 2.04364  | 0.00000  | 0.00022  | 2.04456  | -0.00001 |
| C | 1.05660  | 2.85062  | 0.02766  | 2.86894  | 1.09954  | 0.00447  | 2.86949  | 1.09815  | 0.01851  |
| C | 2.18617  | 3.62339  | -0.42126 | 4.24378  | 0.68240  | 0.11528  | 4.23977  | 0.68579  | 0.13307  |
| C | 3.09564  | 2.73529  | -0.92683 | 4.24378  | -0.68240 | 0.11527  | 4.23962  | -0.68671 | 0.13309  |
| C | 2.55834  | 1.41985  | -0.71172 | 2.86894  | -1.09954 | 0.00445  | 2.86924  | -1.09877 | 0.01853  |
| C | 3.25762  | 0.21274  | -0.84478 | 2.44850  | -2.44895 | 0.01145  | 2.44033  | -2.47036 | 0.01238  |
| C | 2.72200  | -1.01335 | -0.38206 | 1.09980  | -2.87126 | 0.00671  | 1.10459  | -2.87372 | 0.00461  |
| C | 3.49076  | -2.20510 | -0.15124 | 0.68235  | -4.25032 | -0.00581 | 0.67431  | -4.27286 | -0.00823 |
| C | 2.64777  | -3.11352 | 0.42902  | -0.68235 | -4.25032 | 0.00585  | -0.67525 | -4.27271 | 0.00818  |
| C | 1.35725  | -2.48673 | 0.51584  | -1.09979 | -2.87126 | -0.00669 | -1.10523 | -2.87348 | -0.00462 |
| C | 0.16577  | -3.15166 | 0.87866  | -2.44850 | -2.44895 | -0.01145 | -2.44087 | -2.46982 | -0.01236 |
| C | -1.09929 | -2.61355 | 0.58446  | -2.86894 | -1.09954 | -0.00447 | -2.86949 | -1.09815 | -0.01849 |
| C | -2.35288 | -3.31120 | 0.67586  | -4.24377 | -0.68240 | -0.11531 | -4.23978 | -0.68579 | -0.13298 |
| C | -3.29714 | -2.50580 | 0.09934  | -4.24377 | 0.68240  | -0.11532 | -4.23963 | 0.68672  | -0.13296 |
| C | -2.63080 | -1.29108 | -0.28004 | -2.86894 | 1.09954  | -0.00449 | -2.86924 | 1.09877  | -0.01847 |
| C | -3.29028 | -0.14208 | -0.79555 | -2.44850 | 2.44895  | -0.01147 | -2.44033 | 2.47036  | -0.01233 |
| C | -2.70589 | 1.12495  | -0.73967 | -1.09980 | 2.87126  | -0.00671 | -1.10459 | 2.87372  | -0.00461 |
| C | -3.35400 | 2.37290  | -1.03768 | -0.68235 | 4.25032  | 0.00584  | -0.67431 | 4.27286  | 0.00817  |
| C | -2.54734 | 3.36499  | -0.55195 | 0.68235  | 4.25032  | -0.00580 | 0.67525  | 4.27272  | -0.00827 |
| C | -1.36982 | 2.72369  | -0.02530 | 1.09979  | 2.87126  | 0.00673  | 1.10523  | 2.87349  | 0.00457  |
| C | -0.19454 | 3.38873  | 0.46880  | 2.44850  | 2.44895  | 0.01147  | 2.44087  | 2.46983  | 0.01233  |
| H | 2.23779  | 4.70157  | -0.44357 | 5.09273  | 1.34163  | 0.21183  | 5.08733  | 1.34691  | 0.22732  |
| H | 4.04021  | 2.95681  | -1.39994 | 5.09273  | -1.34163 | 0.21181  | 5.08704  | -1.34801 | 0.22735  |
| H | 4.53957  | -2.32222 | -0.37905 | 1.34072  | -5.10506 | -0.02462 | 1.33815  | -5.12368 | -0.02620 |
| H | 2.86949  | -4.12423 | 0.73722  | -1.34071 | -5.10506 | 0.02468  | -1.33928 | -5.12339 | 0.02611  |
| H | -2.49539 | -4.28773 | 1.11244  | -5.09273 | -1.34163 | -0.21187 | -5.08734 | -1.34690 | -0.22720 |
| H | -4.35285 | -2.69878 | -0.01906 | -5.09273 | 1.34162  | -0.21189 | -5.08705 | 1.34802  | -0.22718 |
| H | -4.29908 | 2.48260  | -1.54767 | -1.34072 | 5.10506  | 0.02466  | -1.33815 | 5.12369  | 0.02612  |
| H | -2.69847 | 4.43031  | -0.63670 | 1.34071  | 5.10506  | -0.02460 | 1.33928  | 5.12339  | -0.02626 |
| C | 0.27896  | -4.50086 | 1.48888  | -3.50487 | -3.49819 | -0.03529 | -3.50297 | -3.51350 | -0.03285 |
| C | -0.23470 | -5.64165 | 0.84715  | -4.39564 | -3.63203 | 1.04405  | -4.38283 | -3.65123 | 1.05486  |
| C | 0.93806  | -4.64780 | 2.72270  | -3.62819 | -4.36267 | -1.13704 | -3.64612 | -4.36690 | -1.14011 |
| C | -0.09691 | -6.90117 | 1.43224  | -5.38175 | -4.61965 | 1.02583  | -5.37507 | -4.63296 | 1.04018  |
| H | -0.71417 | -5.54131 | -0.12169 | -4.30103 | -2.97123 | 1.90061  | -4.27672 | -2.99665 | 1.91511  |
| C | 1.05785  | -5.90662 | 3.31306  | -4.62839 | -5.33584 | -1.16068 | -4.64859 | -5.33920 | -1.15817 |
| H | 1.33976  | -3.77064 | 3.22126  | -2.95045 | -4.25667 | -1.97888 | -2.98003 | -4.25515 | -1.99085 |
| C | 0.54249  | -7.03594 | 2.66889  | -5.50350 | -5.47018 | -0.07783 | -5.51223 | -5.47693 | -0.06717 |
| H | -0.48387 | -7.77693 | 0.92019  | -6.05411 | -4.72400 | 1.87193  | -6.03947 | -4.73926 | 1.89237  |
| H | 1.55451  | -6.00526 | 4.27349  | -4.72418 | -5.98761 | -2.02374 | -4.75570 | -5.98554 | -2.02404 |
| H | 0.64318  | -8.01596 | 3.12517  | -6.27611 | -6.23276 | -0.09426 | -6.28836 | -6.23599 | -0.07987 |
| C | 4.63862  | 0.20894  | -1.39107 | 3.50488  | -3.49819 | 0.03529  | 3.50220  | -3.51426 | 0.03285  |
| C | 4.92921  | -0.55879 | -2.53338 | 3.62821  | -4.36265 | 1.13705  | 3.64512  | -4.36776 | 1.14007  |
| C | 5.67144  | 0.93909  | -0.77684 | 4.39563  | -3.63205 | -1.04407 | 4.38208  | -3.65213 | -1.05483 |
| C | 6.22019  | -0.57546 | -3.06268 | 4.62841  | -5.33582 | 1.16070  | 4.64737  | -5.34029 | 1.15811  |
| H | 4.13643  | -1.12707 | -3.01071 | 2.95049  | -4.25663 | 1.97890  | 2.97902  | -4.25592 | 1.99078  |
| C | 6.96541  | 0.90586  | -1.29898 | 5.38173  | -4.61966 | -1.02585 | 5.37410  | -4.63407 | -1.04017 |
| H | 5.46300  | 1.50656  | 0.12494  | 4.30100  | -2.97126 | -1.90063 | 4.27614  | -2.99747 | -1.91505 |
| C | 7.24133  | 0.15495  | -2.44612 | 5.50350  | -5.47018 | 0.07782  | 5.51103  | -5.47814 | 0.06714  |
| H | 6.42858  | -1.15904 | -3.95419 | 4.72421  | -5.98757 | 2.02376  | 4.75431  | -5.98670 | 2.02394  |
| H | 7.75820  | 1.46123  | -0.80708 | 6.05408  | -4.72403 | -1.87195 | 6.03851  | -4.74047 | -1.89234 |
| H | 8.24727  | 0.13478  | -2.85411 | 6.27612  | -6.23276 | 0.09426  | 6.28699  | -6.23737 | 0.07982  |
| C | -0.26208 | 4.56496  | 1.32920  | 3.50487  | 3.49819  | 0.03534  | 3.50298  | 3.51350  | 0.03277  |
| C | -1.50059 | 5.13314  | 1.73761  | 3.62819  | 4.36264  | 1.13711  | 3.64611  | 4.36697  | 1.13998  |
| C | 0.91504  | 5.11374  | 1.91179  | 4.39564  | 3.63207  | -1.04401 | 4.38286  | 3.65116  | -1.05493 |
| C | -1.54809 | 6.24055  | 2.57509  | 4.62839  | 5.33581  | 1.16078  | 4.64858  | 5.33927  | 1.15800  |
| H | -2.43457 | 4.68891  | 1.42545  | 2.95046  | 4.25661  | 1.97895  | 2.98000  | 4.25528  | 1.99072  |
| C | 0.86154  | 6.22065  | 2.74977  | 5.38174  | 4.61968  | -1.02576 | 5.37510  | 4.63288  | -1.04030 |
| H | 1.87465  | 4.64595  | 1.73989  | 4.30102  | 2.97128  | -1.90058 | 4.27675  | 2.99653  | -1.91515 |
| C | -0.36793 | 6.80697  | 3.07148  | 5.50349  | 5.47019  | 0.07792  | 5.51224  | 5.47692  | 0.06701  |
| H | -2.51109 | 6.65287  | 2.85968  | 4.72418  | 5.98756  | 2.02385  | 4.75569  | 5.98566  | 2.02383  |
| H | 1.78021  | 6.61423  | 3.17347  | 6.05410  | 4.72405  | -1.87186 | 6.03952  | 4.73912  | -1.89248 |
| H | -0.40869 | 7.66881  | 3.73033  | 6.27610  | 6.23277  | 0.09437  | 6.28838  | 6.23598  | 0.07967  |
| C | -4.67353 | -0.30895 | -1.30552 | -3.50487 | 3.49819  | -0.03534 | -3.50221 | 3.51427  | -0.03278 |

|    |          |          |          |          |         |          |          |         |          |
|----|----------|----------|----------|----------|---------|----------|----------|---------|----------|
| C  | -4.91803 | -1.20563 | -2.36224 | -4.39566 | 3.63204 | 1.04399  | -4.38202 | 3.65216 | 1.05495  |
| C  | -5.75464 | 0.39058  | -0.73942 | -3.62818 | 4.36266 | -1.13710 | -3.64518 | 4.36773 | -1.14001 |
| C  | -6.21052 | -1.37660 | -2.85842 | -5.38176 | 4.61966 | 1.02575  | -5.37404 | 4.63410 | 1.04031  |
| H  | -4.08855 | -1.75171 | -2.80150 | -4.30106 | 2.97125 | 1.90055  | -4.27604 | 2.99753 | 1.91518  |
| C  | -7.04906 | 0.20274  | -1.22621 | -4.62838 | 5.33583 | -1.16077 | -4.64744 | 5.34025 | -1.15803 |
| H  | -5.58105 | 1.05426  | 0.10188  | -2.95043 | 4.25664 | -1.97893 | -2.97913 | 4.25587 | -1.99076 |
| C  | -7.27910 | -0.67449 | -2.29078 | -5.50350 | 5.47018 | -0.07792 | -5.51103 | 5.47814 | -0.06701 |
| H  | -6.38366 | -2.05796 | -3.68579 | -6.05413 | 4.72402 | 1.87183  | -6.03841 | 4.74052 | 1.89252  |
| H  | -7.87772 | 0.73592  | -0.77024 | -4.72415 | 5.98759 | -2.02383 | -4.75443 | 5.98664 | -2.02387 |
| H  | -8.28598 | -0.81508 | -2.67186 | -6.27611 | 6.23276 | -0.09437 | -6.28700 | 6.23737 | -0.07967 |
| Ni | -0.01116 | 0.07733  | -0.04836 | 0.00000  | 0.00000 | 0.00000  | 0.00000  | 0.00000 | 0.00000  |

### H-NiTPP, total charge 0

|   | Doublet  |          |          | Quartet  |          |          | Sextet   |          |          |
|---|----------|----------|----------|----------|----------|----------|----------|----------|----------|
| N | 1.68989  | -1.12116 | -0.05917 | -0.31238 | -2.03206 | -0.00826 | 1.33267  | 1.45776  | 0.03613  |
| N | -1.12243 | -1.69247 | -0.06588 | -1.99041 | 0.30660  | -0.03141 | 1.53518  | -1.38584 | -0.23265 |
| N | -1.69141 | 1.12119  | -0.04059 | 0.31480  | 2.03235  | 0.01781  | -1.32718 | -1.65517 | -0.24815 |
| N | 1.12071  | 1.69223  | -0.04677 | 1.99345  | -0.30628 | -0.05044 | -1.51262 | 1.19405  | 0.03363  |
| C | 2.98816  | -0.65927 | 0.00231  | 0.65067  | -3.01166 | 0.01299  | 1.06139  | 2.73371  | 0.45643  |
| C | 3.90462  | -1.77282 | 0.10976  | 0.02538  | -4.31726 | 0.06309  | 2.29638  | 3.47523  | 0.58077  |
| C | 3.15171  | -2.90789 | 0.11068  | -1.32087 | -4.11039 | 0.05962  | 3.30081  | 2.64444  | 0.16390  |
| C | 1.76945  | -2.49661 | 0.00449  | -1.52530 | -2.67719 | 0.00676  | 2.69075  | 1.38229  | -0.17477 |
| C | 0.68339  | -3.38374 | -0.01702 | -2.78058 | -2.05156 | -0.02602 | 3.37259  | 0.23680  | -0.63410 |
| C | -0.66261 | -2.99200 | -0.05232 | -2.97748 | -0.66144 | -0.05917 | 2.80023  | -1.05012 | -0.72387 |
| C | -1.77895 | -3.91186 | -0.07605 | -4.27194 | -0.03167 | -0.13992 | 3.42900  | -2.22832 | -1.21260 |
| C | -2.91364 | -3.15848 | -0.07231 | -4.06370 | 1.31739  | -0.13877 | 2.56425  | -3.28717 | -0.96160 |
| C | -2.49873 | -1.77307 | -0.06077 | -2.63972 | 1.52704  | -0.05802 | 1.42196  | -2.74022 | -0.32550 |
| C | -3.38288 | -0.68598 | -0.02777 | -2.03310 | 2.79299  | -0.03006 | 0.26050  | -3.46968 | 0.20472  |
| C | -2.99016 | 0.65948  | -0.00233 | -0.64812 | 3.01247  | 0.00123  | -1.04944 | -2.97365 | -0.19866 |
| C | -3.91085 | 1.77378  | 0.04005  | -0.02209 | 4.31866  | -0.00167 | -2.18928 | -3.74259 | -0.61570 |
| C | -3.15880 | 2.90940  | 0.04342  | 1.32400  | 4.11115  | -0.00726 | -3.19188 | -2.84143 | -0.89331 |
| C | -1.77332 | 2.49752  | -0.01127 | 1.52799  | 2.67707  | 0.00761  | -2.65614 | -1.53308 | -0.64470 |
| C | -0.68700 | 3.38376  | -0.03967 | 2.78340  | 2.05152  | -0.02273 | -3.36386 | -0.32680 | -0.66272 |
| C | 0.65919  | 2.99098  | -0.06818 | 2.98128  | 0.66149  | -0.05065 | -2.83748 | 0.93586  | -0.29730 |
| C | 1.77331  | 3.91017  | -0.14418 | 4.27789  | 0.03113  | -0.05960 | -3.58844 | 2.14709  | -0.21720 |
| C | 2.90875  | 3.15788  | -0.14300 | 4.06938  | -1.31785 | -0.06192 | -2.72368 | 3.13516  | 0.20185  |
| C | 2.49660  | 1.77352  | -0.06577 | 2.64327  | -1.52707 | -0.03937 | -1.43236 | 2.53234  | 0.33850  |
| C | 3.38237  | 0.68642  | -0.02814 | 2.03590  | -2.79257 | -0.00698 | -0.23873 | 3.25006  | 0.64666  |
| H | 4.97864  | -1.68949 | 0.18756  | 0.55283  | -5.25907 | 0.10235  | 2.38564  | 4.49329  | 0.92931  |
| H | 3.49232  | -3.92992 | 0.18853  | -2.10653 | -4.85068 | 0.09641  | 4.35811  | 2.86099  | 0.15158  |
| H | -1.69765 | -4.98871 | -0.09270 | -5.21467 | -0.55513 | -0.20066 | 4.39740  | -2.27289 | -1.68936 |
| H | -3.93827 | -3.50042 | -0.07678 | -4.80438 | 2.10130  | -0.19749 | 2.70880  | -4.32978 | -1.20719 |
| H | -4.98753 | 1.69012  | 0.06258  | -0.54872 | 5.26166  | -0.00815 | -2.21956 | -4.81866 | -0.71055 |
| H | -3.50267 | 3.93268  | 0.07792  | 2.10993  | -4.85179 | -0.02784 | -4.19788 | -3.05458 | -1.22502 |
| H | 1.68979  | 4.98530  | -0.20468 | 5.22297  | 0.55383  | -0.05872 | -4.63702 | 2.25185  | -0.45355 |
| H | 3.93126  | 3.50040  | -0.20329 | 4.81224  | -2.10176 | -0.07270 | -2.94599 | 4.17990  | 0.36155  |
| C | -4.85098 | -0.98351 | -0.00821 | -2.92948 | 3.99256  | -0.04478 | 0.41289  | -4.58784 | 1.09904  |
| C | -5.58888 | -0.85747 | 1.17827  | -3.65915 | 4.35039  | 1.09914  | -0.71395 | -5.20501 | 1.72427  |
| C | -5.51026 | -1.39343 | -1.17670 | -3.05450 | 4.77731  | -1.20126 | 1.69614  | -5.09110 | 1.47256  |
| C | -6.95830 | -1.13594 | 1.19682  | -4.49511 | 5.47022  | 1.08805  | -0.56686 | -6.27470 | 2.59747  |
| H | -5.08222 | -0.54216 | 2.08600  | -3.56421 | 3.74708  | 1.99749  | -1.70699 | -4.81473 | 1.54135  |
| C | -6.88000 | -1.67059 | -1.16017 | -3.89191 | 5.89605  | -1.21460 | 1.83143  | -6.16094 | 2.34812  |
| H | -4.94330 | -1.49082 | -2.09822 | -2.49392 | 4.50285  | -2.09033 | 2.58885  | -4.62113 | 1.08097  |
| C | -7.60774 | -1.54293 | 0.02713  | -4.61415 | 6.24599  | -0.06938 | 0.70444  | -6.77657 | 2.90987  |
| H | -7.51594 | -1.03645 | 2.12391  | -5.05076 | 5.73666  | 1.98280  | -1.45065 | -6.71397 | 3.05215  |
| H | -7.37738 | -1.98418 | -2.07375 | -3.98092 | 6.49165  | -2.11885 | 2.82665  | -6.51477 | 2.60340  |
| H | -8.67227 | -1.75885 | 0.04074  | -5.26446 | 7.11606  | -0.07886 | 0.81507  | -7.61464 | 3.59143  |
| C | 0.98308  | -4.85031 | 0.01731  | -3.99527 | -2.92657 | -0.02704 | 4.80438  | 0.39253  | -1.01502 |
| C | 0.72375  | -5.60655 | 1.17067  | -4.81509 | -3.01013 | 1.10903  | 5.80909  | -0.33784 | -0.35712 |
| C | 1.53115  | -5.49195 | -1.10390 | -4.33282 | -3.67921 | -1.16240 | 5.17519  | 1.28370  | -2.03665 |
| C | 1.00667  | -6.97461 | 1.20307  | -5.94729 | -3.82912 | 1.11068  | 7.15063  | -0.17718 | -0.70912 |
| H | 0.30200  | -5.11431 | 2.04231  | -4.55648 | -2.43207 | 1.99159  | 5.53030  | -1.01910 | 0.44079  |
| C | 1.81128  | -6.86069 | -1.07434 | -5.46646 | -4.49635 | -1.16326 | 6.51588  | 1.43471  | -2.39689 |
| H | 1.73297  | -4.91137 | -1.99954 | -3.70303 | -3.61637 | -2.04523 | 4.40350  | 1.84822  | -2.55125 |
| C | 1.55051  | -7.60586 | 0.07992  | -6.27663 | -4.57411 | -0.02609 | 7.50802  | 0.70664  | -1.73262 |
| H | 0.80402  | -7.54548 | 2.10494  | -6.56942 | -3.88645 | 1.99948  | 7.91619  | -0.73973 | -0.18229 |
| H | 2.23136  | -7.34377 | -1.95212 | -5.71680 | -5.06949 | -2.05160 | 6.78466  | 2.11980  | -3.19595 |
| H | 1.76939  | -8.66960 | 0.10405  | -7.15728 | -5.21009 | -0.02571 | 8.55144  | 0.82797  | -2.00922 |
| C | 4.84931  | 0.98312  | -0.00883 | 2.92961  | -3.99411 | 0.01245  | -0.39414 | 4.66068  | 1.10132  |
| C | 5.44773  | 1.55689  | 1.12367  | 3.63786  | -4.33789 | 1.17406  | -1.03630 | 4.94030  | 2.32004  |

|    |          |          |          |         |          |          |          |          |          |
|----|----------|----------|----------|---------|----------|----------|----------|----------|----------|
| C  | 5.65125  | 0.69136  | -1.12314 | 3.06896 | -4.79800 | -1.12906 | 0.07189  | 5.73507  | 0.32457  |
| C  | 6.81769  | 1.83127  | 1.14300  | 4.46794 | -5.46189 | 1.19435  | -1.19613 | 6.25702  | 2.75677  |
| H  | 4.83233  | 1.78266  | 1.98980  | 3.53052 | -3.72055 | 2.06141  | -1.40337 | 4.11577  | 2.92427  |
| C  | 7.02061  | 0.96904  | -1.10692 | 3.90055 | -5.92107 | -1.11099 | -0.09317 | 7.05275  | 0.75790  |
| H  | 5.19311  | 0.24902  | -2.00310 | 2.52378 | -4.53535 | -2.03120 | 0.55269  | 5.53033  | -0.62736 |
| C  | 7.60808  | 1.53896  | 0.02698  | 4.60206 | -6.25639 | 0.05131  | -0.72497 | 7.31820  | 1.97689  |
| H  | 7.26663  | 2.27104  | 2.02922  | 5.00688 | -5.71726 | 2.10245  | -1.68718 | 6.45358  | 3.70572  |
| H  | 7.62676  | 0.74175  | -1.97942 | 4.00086 | -6.53169 | -2.00398 | 0.26692  | 7.87119  | 0.14074  |
| H  | 8.67289  | 1.75347  | 0.04080  | 5.24778 | -7.12979 | 0.06634  | -0.85155 | 8.34278  | 2.31479  |
| C  | -0.98324 | 4.85137  | -0.03695 | 3.99655 | 2.92895  | -0.02681 | -4.80197 | -0.38582 | -1.06642 |
| C  | -1.52464 | 5.47244  | -1.17296 | 4.37592 | 3.62492  | 1.13121  | -5.14943 | -0.65040 | -2.39991 |
| C  | -0.72209 | 5.63033  | 1.10074  | 4.77116 | 3.07327  | -1.18808 | -5.82164 | -0.19336 | -0.12158 |
| C  | -1.79757 | 6.84291  | -1.17267 | 5.50663 | 4.44613  | 1.12927  | -6.49167 | -0.71410 | -2.78292 |
| H  | -1.72645 | 4.87457  | -2.05714 | 3.78065 | 3.51525  | 2.03322  | -4.36240 | -0.80045 | -3.13307 |
| C  | -0.99787 | 7.00025  | 1.10387  | 5.90070 | 3.89601  | -1.19219 | -7.16345 | -0.26451 | -0.50360 |
| H  | -0.30416 | 5.15437  | 1.98321  | 4.47988 | 2.53955  | -2.08827 | -5.55615 | 0.00381  | 0.91285  |
| C  | -1.53574 | 7.61068  | -0.03353 | 6.27210 | 4.58430  | -0.03286 | -7.50218 | -0.52261 | -1.83573 |
| H  | -2.21243 | 7.30978  | -2.06163 | 5.78954 | 4.97537  | 2.03491  | -6.74637 | -0.91339 | -3.81997 |
| H  | -0.79388 | 7.58892  | 1.99393  | 6.48787 | 4.00044  | -2.10030 | -7.94276 | -0.12046 | 0.23938  |
| H  | -1.74896 | 8.67584  | -0.03225 | 7.15055 | 5.22331  | -0.03519 | -8.54564 | -0.57521 | -2.13287 |
| Ni | -0.00094 | -0.00067 | 0.05766  | 0.00184 | 0.00000  | 0.19720  | 0.00888  | -0.11553 | 0.11339  |
| H  | 0.00214  | -0.01995 | 1.48111  | 0.01490 | -0.02628 | 1.99153  | 0.01838  | -0.33397 | 1.91370  |

### H-NiTPP, total charge 1

|   | Singlet  |          |          | Triplet  |          |          | Quintet  |          |          |
|---|----------|----------|----------|----------|----------|----------|----------|----------|----------|
| N | 1.26516  | 1.47368  | -0.04015 | -0.00508 | 2.03587  | -0.05393 | -0.00002 | 2.06521  | -0.01938 |
| N | 1.44642  | -1.26866 | -0.07628 | 2.03355  | 0.00507  | -0.02284 | 2.01776  | 0.00002  | -0.02671 |
| N | -1.26516 | -1.47368 | -0.04015 | 0.00508  | -2.03587 | -0.05393 | 0.00002  | -2.06521 | -0.01938 |
| N | -1.44642 | 1.26866  | -0.07628 | -2.03355 | -0.00507 | -0.02284 | -2.01776 | -0.00002 | -0.02671 |
| C | 1.02231  | 2.77342  | 0.40689  | -1.10584 | 2.85607  | -0.14743 | -1.09710 | 2.88233  | 0.08577  |
| C | 2.26305  | 3.46793  | 0.59595  | -0.69315 | 4.21710  | -0.38097 | -0.68256 | 4.24617  | 0.31136  |
| C | 3.25707  | 2.62702  | 0.19421  | 0.67197  | 4.22051  | -0.38101 | 0.68246  | 4.24619  | 0.31137  |
| C | 2.63965  | 1.38474  | -0.17385 | 1.09144  | 2.86155  | -0.14755 | 1.09703  | 2.88236  | 0.08579  |
| C | 3.35393  | 0.24119  | -0.53491 | 2.43702  | 2.45106  | -0.01982 | 2.43947  | 2.45628  | -0.02084 |
| C | 2.76065  | -1.01582 | -0.46754 | 2.85082  | 1.10620  | 0.10418  | 2.83924  | 1.10363  | -0.14190 |
| C | 3.46898  | -2.25446 | -0.61765 | 4.20619  | 0.69334  | 0.36375  | 4.18696  | 0.68519  | -0.39944 |
| C | 2.63116  | -3.24864 | -0.21085 | 4.20960  | -0.67221 | 0.36379  | 4.18698  | -0.68509 | -0.39945 |
| C | 1.37627  | -2.63794 | 0.11917  | 2.85630  | -1.09184 | 0.10428  | 2.83926  | -1.10357 | -0.14192 |
| C | 0.23618  | -3.35891 | 0.48257  | 2.44922  | -2.43887 | -0.01966 | 2.43953  | -2.45623 | -0.02088 |
| C | -1.02231 | -2.77342 | 0.40689  | 1.10584  | -2.85607 | -0.14743 | 1.09710  | -2.88233 | 0.08577  |
| C | -2.26305 | -3.46793 | 0.59595  | 0.69315  | -4.21710 | -0.38097 | 0.68256  | -4.24617 | 0.31136  |
| C | -3.25707 | -2.62702 | 0.19421  | -0.67197 | -4.22051 | -0.38101 | -0.68246 | -4.24619 | 0.31137  |
| C | -2.63965 | -1.38473 | -0.17385 | -1.09144 | -2.86155 | -0.14755 | -1.09703 | -2.88236 | 0.08579  |
| C | -3.35393 | -0.24118 | -0.53490 | -2.43701 | -2.45106 | -0.01982 | -2.43947 | -2.45628 | -0.02084 |
| C | -2.76065 | 1.01582  | -0.46754 | -2.85082 | -1.10620 | 0.10418  | -2.83924 | -1.10363 | -0.14190 |
| C | -3.46897 | 2.25446  | -0.61765 | -4.20618 | -0.69334 | 0.36375  | -4.18696 | -0.68519 | -0.39944 |
| C | -2.63116 | 3.24864  | -0.21085 | -4.20960 | 0.67221  | 0.36379  | -4.18698 | 0.68509  | -0.39945 |
| C | -1.37626 | 2.63794  | 0.11918  | -2.85630 | 1.09184  | 0.10428  | -2.83926 | 1.10357  | -0.14192 |
| C | -0.23618 | 3.35891  | 0.48257  | -2.44922 | 2.43887  | -0.01966 | -2.43953 | 2.45623  | -0.02088 |
| H | 2.35224  | 4.47692  | 0.96904  | -1.35507 | 5.05327  | -0.54666 | -1.34251 | 5.08524  | 0.47041  |
| H | 4.32192  | 2.80602  | 0.17808  | 1.32969  | 5.05998  | -0.54677 | 1.34239  | 5.08527  | 0.47043  |
| H | 4.48564  | -2.34004 | -0.96959 | 5.03988  | 1.35501  | 0.54260  | 5.02290  | 1.34259  | -0.58377 |
| H | 2.81972  | -4.31118 | -0.17452 | 5.04659  | -1.32969 | 0.54271  | 5.02293  | -1.34246 | -0.58380 |
| H | -2.35224 | -4.47692 | 0.96903  | 1.35507  | -5.05327 | -0.54665 | 1.34252  | -5.08524 | 0.47040  |
| H | -4.32192 | -2.80602 | 0.17808  | -1.32969 | -5.05998 | -0.54677 | -1.34239 | -5.08527 | 0.47043  |
| H | -4.48563 | 2.34005  | -0.96960 | -5.03988 | -1.35501 | 0.54260  | -5.02290 | -1.34259 | -0.58377 |
| H | -2.81972 | 4.31118  | -0.17452 | -5.04659 | 1.32969  | 0.54271  | -5.02293 | 1.34246  | -0.58380 |
| C | 0.38652  | -4.79019 | 0.86426  | 3.50355  | -3.48647 | -0.00663 | 3.50302  | -3.49399 | -0.01224 |
| C | -0.18642 | -5.81204 | 0.08895  | 3.50205  | -4.48874 | 0.98067  | 3.52448  | -4.50334 | -0.99233 |
| C | 1.13435  | -5.13179 | 2.00346  | 4.51748  | -3.48873 | -0.98203 | 4.50266  | -3.48158 | 0.97809  |
| C | -0.01751 | -7.15009 | 0.45034  | 4.49960  | -5.46408 | 0.99727  | 4.52966  | -5.47088 | -0.98694 |
| H | -0.74615 | -5.55588 | -0.80577 | 2.72968  | -4.48577 | 1.74376  | 2.76437  | -4.51113 | -1.76763 |
| C | 1.29158  | -6.47003 | 2.36948  | 5.49994  | -4.47935 | -0.97595 | 5.49332  | -4.46387 | 0.99330  |
| H | 1.58136  | -4.34565 | 2.60516  | 4.51801  | -2.72488 | -1.75368 | 4.48476  | -2.71325 | 1.74510  |
| C | 0.71727  | -7.48146 | 1.59324  | 5.49689  | -5.46536 | 0.01634  | 5.51254  | -5.45710 | 0.00844  |
| H | -0.45532 | -7.93231 | -0.16234 | 4.49842  | -6.22169 | 1.77495  | 4.54610  | -6.23388 | -1.75917 |
| H | 1.86173  | -6.72178 | 3.25854  | 6.26657  | -4.48148 | -1.74474 | 6.24853  | -4.45438 | 1.77326  |
| H | 0.84427  | -8.52217 | 1.87533  | 6.26733  | -6.23030 | 0.02517  | 6.28900  | -6.21592 | 0.01643  |
| C | 4.79724  | 0.38182  | -0.87556 | 3.48604  | 3.50397  | -0.00693 | 3.50294  | 3.49406  | -0.01217 |
| C | 5.79621  | -0.17921 | -0.06295 | 4.49987  | 3.51125  | -0.98240 | 4.50257  | 3.48166  | 0.97818  |

|    |          |          |          |          |          |          |          |          |          |
|----|----------|----------|----------|----------|----------|----------|----------|----------|----------|
| C  | 5.17089  | 1.11589  | -2.01346 | 3.47957  | 4.50630  | 0.98029  | 3.52440  | 4.50343  | -0.99225 |
| C  | 7.14417  | -0.01390 | -0.38759 | 5.47735  | 4.50679  | -0.97647 | 5.49321  | 4.46396  | 0.99341  |
| H  | 5.51456  | -0.72779 | 0.83103  | 4.50419  | 2.74734  | -1.75399 | 4.48467  | 2.71332  | 1.74517  |
| C  | 6.51918  | 1.26924  | -2.34267 | 4.47222  | 5.48663  | 0.99674  | 4.52957  | 5.47098  | -0.98683 |
| H  | 4.40202  | 1.55474  | -2.64283 | 2.70730  | 4.49950  | 1.74345  | 2.76431  | 4.51122  | -1.76756 |
| C  | 7.50802  | 0.70600  | -1.53006 | 5.46942  | 5.49285  | 0.01574  | 5.51243  | 5.45720  | 0.00857  |
| H  | 7.90857  | -0.44293 | 0.25316  | 6.24391  | 4.51271  | -1.74531 | 6.24841  | 4.45447  | 1.77339  |
| H  | 6.79624  | 1.82816  | -3.23133 | 4.46730  | 6.24428  | 1.77437  | 4.54600  | 6.23399  | -1.75905 |
| H  | 8.55639  | 0.83019  | -1.78361 | 6.23599  | 6.26166  | 0.02445  | 6.28888  | 6.21604  | 0.01659  |
| C  | -0.38652 | 4.79019  | 0.86426  | -3.50355 | 3.48647  | -0.00663 | -3.50302 | 3.49399  | -0.01224 |
| C  | -1.13435 | 5.13179  | 2.00346  | -4.51748 | 3.48873  | -0.98203 | -4.50266 | 3.48158  | 0.97810  |
| C  | 0.18641  | 5.81205  | 0.08894  | -3.50205 | 4.48874  | 0.98067  | -3.52448 | 4.50333  | -0.99233 |
| C  | -1.29158 | 6.47003  | 2.36948  | -5.49994 | 4.47935  | -0.97595 | -5.49332 | 4.46387  | 0.99330  |
| H  | -1.58135 | 4.34565  | 2.60517  | -4.51800 | 2.72488  | -1.75368 | -4.48475 | 2.71325  | 1.74510  |
| C  | 0.01750  | 7.15009  | 0.45033  | -4.49961 | 5.46407  | 0.99727  | -4.52967 | 5.47087  | -0.98694 |
| H  | 0.74613  | 5.55588  | -0.80577 | -2.72968 | 4.48577  | 1.74377  | -2.76438 | 4.51113  | -1.76763 |
| C  | -0.71727 | 7.48146  | 1.59324  | -5.49690 | 5.46536  | 0.01634  | -5.51254 | 5.45709  | 0.00844  |
| H  | -1.86172 | 6.72178  | 3.25855  | -6.26657 | 4.48148  | -1.74474 | -6.24853 | 4.45438  | 1.77326  |
| H  | 0.45530  | 7.93232  | -0.16235 | -4.49843 | 6.22169  | 1.77495  | -4.54610 | 6.23387  | -1.75918 |
| H  | -0.84428 | 8.52218  | 1.87532  | -6.26733 | 6.23030  | 0.02517  | -6.28901 | 6.21591  | 0.01643  |
| C  | -4.79724 | -0.38182 | -0.87556 | -3.48604 | -3.50397 | -0.00693 | -3.50294 | -3.49406 | -0.01217 |
| C  | -5.17089 | -1.11588 | -2.01347 | -3.47957 | -4.50630 | 0.98029  | -3.52440 | -4.50343 | -0.99225 |
| C  | -5.79622 | 0.17919  | -0.06294 | -4.49987 | -3.51124 | -0.98240 | -4.50257 | -3.48165 | 0.97818  |
| C  | -6.51917 | -1.26924 | -2.34267 | -4.47221 | -5.48663 | 0.99674  | -4.52957 | -5.47098 | -0.98683 |
| H  | -4.40202 | -1.55473 | -2.64284 | -2.70728 | -4.49951 | 1.74344  | -2.76431 | -4.51122 | -1.76756 |
| C  | -7.14417 | 0.01388  | -0.38759 | -5.47736 | -4.50679 | -0.97647 | -5.49321 | -4.46396 | 0.99341  |
| H  | -5.51456 | 0.72777  | 0.83104  | -4.50420 | -2.74733 | -1.75398 | -4.48467 | -2.71332 | 1.74517  |
| C  | -7.50802 | -0.70601 | -1.53006 | -5.46942 | -5.49285 | 0.01574  | -5.51243 | -5.45720 | 0.00857  |
| H  | -6.79623 | -1.82815 | -3.23134 | -4.46729 | -6.24429 | 1.77436  | -4.54600 | -6.23399 | -1.75905 |
| H  | -7.90857 | 0.44290  | 0.25317  | -6.24392 | -4.51270 | -1.74530 | -6.24841 | -4.45447 | 1.77339  |
| H  | -8.55639 | -0.83020 | -1.78361 | -6.23599 | -6.26166 | 0.02445  | -6.28888 | -6.21604 | 0.01659  |
| Ni | 0.00000  | 0.00000  | 0.01342  | 0.00000  | 0.00000  | 0.02528  | 0.00000  | 0.00000  | 0.12022  |
| H  | 0.00000  | 0.00000  | 1.43645  | 0.00000  | 0.00000  | 1.45198  | 0.00000  | -0.00002 | 1.93428  |

### PbTPP, total charge 0

|   | Singlet  |          |          | Triplet  |          |          | Quintet  |          |         |
|---|----------|----------|----------|----------|----------|----------|----------|----------|---------|
| N | -2.08767 | -0.00005 | 0.00965  | 2.09774  | 0.00262  | -0.03787 | -2.09485 | 0.00006  | 0.16279 |
| N | 0.00646  | -2.09011 | -0.04099 | -0.00568 | 2.09846  | -0.09866 | -0.00383 | -2.09552 | 0.10263 |
| N | 2.09234  | 0.00004  | -0.09265 | -2.09499 | -0.00260 | -0.15285 | 2.09389  | -0.00006 | 0.04415 |
| N | 0.00637  | 2.09010  | -0.04099 | -0.00044 | -2.09846 | -0.09867 | -0.00372 | 2.09551  | 0.10263 |
| C | -2.87867 | 1.10917  | -0.16098 | 2.89709  | -1.10473 | -0.21222 | -2.91533 | 1.11203  | 0.18416 |
| C | -4.23716 | 0.68282  | -0.43096 | 4.22639  | -0.68835 | -0.50694 | -4.29808 | 0.68491  | 0.20039 |
| C | -4.23713 | -0.68300 | -0.43097 | 4.22466  | 0.69889  | -0.50694 | -4.29811 | -0.68468 | 0.20039 |
| C | -2.87862 | -1.10929 | -0.16098 | 2.89432  | 1.11196  | -0.21222 | -2.91539 | -1.11188 | 0.18415 |
| C | -2.44556 | -2.45508 | -0.17624 | 2.43885  | 2.48098  | -0.19810 | -2.47372 | -2.46673 | 0.19055 |
| C | -1.10159 | -2.89214 | -0.16774 | 1.10478  | 2.91705  | -0.16772 | -1.11750 | -2.90789 | 0.18675 |
| C | -0.67189 | -4.26419 | -0.35337 | 0.66633  | 4.30064  | -0.24901 | -0.69286 | -4.28426 | 0.32327 |
| C | 0.69387  | -4.25971 | -0.36092 | -0.69519 | 4.29424  | -0.25866 | 0.67669  | -4.28881 | 0.30960 |
| C | 1.11723  | -2.88762 | -0.16454 | -1.12232 | 2.90873  | -0.15937 | 1.10724  | -2.91253 | 0.18813 |
| C | 2.46301  | -2.45360 | -0.16939 | -2.45636 | 2.47080  | -0.18311 | 2.46128  | -2.46958 | 0.19748 |
| C | 2.89954  | -1.10915 | -0.16555 | -2.91484 | 1.10421  | -0.18902 | 2.89949  | -1.11239 | 0.18661 |
| C | 4.28181  | -0.68278 | -0.26344 | -4.27644 | 0.68823  | -0.24199 | 4.26224  | -0.68490 | 0.41721 |
| C | 4.28179  | 0.68295  | -0.26345 | -4.27471 | -0.69888 | -0.24198 | 4.26228  | 0.68468  | 0.41721 |
| C | 2.89949  | 1.10926  | -0.16555 | -2.91207 | -1.11147 | -0.18902 | 2.89955  | 1.11223  | 0.18660 |
| C | 2.46291  | 2.45369  | -0.16940 | -2.45019 | -2.47690 | -0.18312 | 2.46142  | 2.46944  | 0.19747 |
| C | 1.11711  | 2.88766  | -0.16456 | -1.11506 | -2.91150 | -0.15939 | 1.10740  | 2.91247  | 0.18813 |
| C | 0.69370  | 4.25972  | -0.36094 | -0.68449 | -4.29594 | -0.25868 | 0.67692  | 4.28876  | 0.30962 |
| C | -0.67206 | 4.26415  | -0.35339 | 0.67704  | -4.29895 | -0.24902 | -0.69264 | 4.28429  | 0.32330 |
| C | -1.10171 | 2.89209  | -0.16774 | 1.11206  | -2.91428 | -0.16774 | -1.11735 | 2.90794  | 0.18677 |
| C | -2.44565 | 2.45497  | -0.17624 | 2.44504  | -2.47489 | -0.19810 | -2.47359 | 2.46686  | 0.19056 |
| H | -5.06726 | 1.34228  | -0.63943 | 5.05777  | -1.34121 | -0.72834 | -5.15574 | 1.34097  | 0.20717 |
| H | -5.06720 | -1.34249 | -0.63944 | 5.05440  | 1.35383  | -0.72835 | -5.15581 | -1.34069 | 0.20717 |
| H | -1.32619 | -5.11312 | -0.48679 | 1.31725  | 5.16013  | -0.31043 | -1.35151 | -5.13258 | 0.43614 |
| H | 1.35407  | -5.10119 | -0.51386 | -1.35468 | 5.14521  | -0.34649 | 1.33046  | -5.14381 | 0.39472 |
| H | 5.13713  | -1.33909 | -0.33095 | -5.13774 | 1.33871  | -0.27645 | 5.09866  | -1.34318 | 0.59987 |
| H | 5.13707  | 1.33929  | -0.33095 | -5.13439 | -1.35150 | -0.27644 | 5.09873  | 1.34291  | 0.59986 |
| H | 1.35386  | 5.10123  | -0.51389 | -1.34186 | -5.14855 | -0.34652 | 1.33073  | 5.14373  | 0.39475 |
| H | -1.32640 | 5.11306  | -0.48681 | 1.33010  | -5.15682 | -0.31044 | -1.35124 | 5.13264  | 0.43619 |

|    |          |          |          |          |          |          |          |          |          |
|----|----------|----------|----------|----------|----------|----------|----------|----------|----------|
| C  | 3.51235  | -3.51889 | -0.25213 | -3.51338 | 3.52471  | -0.23506 | 3.52558  | -3.51112 | 0.29205  |
| C  | 4.26540  | -3.69914 | -1.42336 | -4.30339 | 3.68941  | -1.38462 | 4.42062  | -3.71178 | -0.77217 |
| C  | 3.75144  | -4.36831 | 0.83963  | -3.73205 | 4.37192  | 0.86294  | 3.66838  | -4.29694 | 1.44794  |
| C  | 5.23624  | -4.70110 | -1.50012 | -5.28256 | 4.68372  | -1.43738 | 5.42647  | -4.67760 | -0.68739 |
| H  | 4.07943  | -3.05171 | -2.27546 | -4.13924 | 3.03698  | -2.23701 | 4.32045  | -3.10570 | -1.66812 |
| C  | 4.72310  | -5.36991 | 0.76564  | -4.71744 | 5.36144  | 0.81390  | 4.67630  | -5.26028 | 1.53588  |
| H  | 3.17105  | -4.23662 | 1.74839  | -3.12670 | 4.24765  | 1.75619  | 2.98816  | -4.14102 | 2.28021  |
| C  | 5.46901  | -5.53918 | -0.40497 | -5.49433 | 5.52163  | -0.33731 | 5.55772  | -5.45523 | 0.46758  |
| H  | 5.80676  | -4.82924 | -2.41584 | -5.87882 | 4.80452  | -2.33746 | 6.10568  | -4.82293 | -1.52285 |
| H  | 4.89760  | -6.01567 | 1.62177  | -4.87739 | 6.00520  | 1.67428  | 4.77558  | -5.85446 | 2.44004  |
| H  | 6.22374  | -6.31823 | -0.46397 | -6.25844 | 6.29266  | -0.37749 | 6.34078  | -6.20502 | 0.53530  |
| C  | -3.51285 | -3.49840 | -0.30288 | 3.50684  | 3.51919  | -0.29212 | -3.52370 | -3.52568 | 0.23633  |
| C  | -3.68925 | -4.21043 | -1.50000 | 3.61951  | 4.34158  | -1.42507 | -3.70410 | -4.40136 | -0.84752 |
| C  | -4.37302 | -3.76636 | 0.77341  | 4.43557  | 3.67500  | 0.75062  | -4.34705 | -3.67443 | 1.36509  |
| C  | -4.69695 | -5.17132 | -1.61632 | 4.62972  | 5.30311  | -1.50934 | -4.68439 | -5.39582 | -0.80695 |
| H  | -3.03497 | -3.99986 | -2.34106 | 2.91633  | 4.21461  | -2.24282 | -3.07152 | -4.29456 | -1.72414 |
| C  | -5.38040 | -4.72833 | 0.65988  | 5.43889  | 4.64272  | 0.67149  | -5.32484 | -4.67123 | 1.40891  |
| H  | -4.24568 | -3.21588 | 1.70123  | 4.36248  | 3.03365  | 1.62395  | -4.20979 | -3.00649 | 2.21051  |
| C  | -5.54503 | -5.43436 | -0.53577 | 5.54001  | 5.45957  | -0.45980 | -5.49791 | -5.53449 | 0.32218  |
| H  | -4.82209 | -5.70996 | -2.55154 | 4.70684  | 5.92609  | -2.39602 | -4.81355 | -6.05989 | -1.65710 |
| H  | -6.03477 | -4.92570 | 1.50443  | 6.14237  | 4.75726  | 1.49141  | -5.94807 | -4.77552 | 2.29272  |
| H  | -6.32860 | -6.18132 | -0.62567 | 6.32387  | 6.20885  | -0.52385 | -6.25907 | -6.30876 | 0.35534  |
| C  | -3.51299 | 3.49825  | -0.30287 | 3.51562  | -3.51043 | -0.29212 | -3.52351 | 3.52586  | 0.23636  |
| C  | -3.68944 | 4.21025  | -1.49999 | 3.63035  | -4.33252 | -1.42507 | -3.70386 | 4.40156  | -0.84749 |
| C  | -4.37316 | 3.76619  | 0.77343  | 4.44472  | -3.66392 | 0.75064  | -4.34686 | 3.67465  | 1.36512  |
| C  | -4.69718 | 5.17111  | -1.61631 | 4.64296  | -5.29153 | -1.50933 | -4.68409 | 5.39608  | -0.80692 |
| H  | -3.03516 | 3.99971  | -2.34106 | 2.92687  | -4.20730 | -2.24283 | -3.07128 | 4.29475  | -1.72411 |
| C  | -5.38057 | 4.72812  | 0.65991  | 5.45044  | -4.62914 | 0.67152  | -5.32459 | 4.67150  | 1.40894  |
| H  | -4.24578 | 3.21573  | 1.70126  | 4.37001  | -3.02276 | 1.62397  | -4.20964 | 3.00669  | 2.21053  |
| C  | -5.54525 | 5.43413  | -0.53575 | 5.55361  | -5.44573 | -0.45977 | -5.49761 | 5.53478  | 0.32222  |
| H  | -4.82236 | 5.70973  | -2.55153 | 4.72164  | -5.91432 | -2.39601 | -4.81322 | 6.06017  | -1.65706 |
| H  | -6.03494 | 4.92547  | 1.50447  | 6.15419  | -4.74194 | 1.49144  | -5.94782 | 4.77582  | 2.29275  |
| H  | -6.32885 | 6.18106  | -0.62565 | 6.33934  | -6.19305 | -0.52382 | -6.25872 | 6.30910  | 0.35539  |
| C  | 3.51220  | 3.51902  | -0.25215 | -3.50457 | -3.53344 | -0.23507 | 3.52577  | 3.51093  | 0.29203  |
| C  | 4.26525  | 3.69930  | -1.42337 | -4.29417 | -3.70012 | -1.38463 | 4.42080  | 3.71154  | -0.77220 |
| C  | 3.75126  | 4.36847  | 0.83960  | -3.72111 | -4.38121 | 0.86292  | 3.66863  | 4.29674  | 1.44792  |
| C  | 5.23606  | 4.70130  | -1.50014 | -5.27085 | -4.69688 | -1.43739 | 5.42671  | 4.67730  | -0.68744 |
| H  | 4.07932  | 3.05185  | -2.27547 | -4.13165 | -3.04727 | -2.23701 | 4.32058  | 3.10547  | -1.66815 |
| C  | 4.72287  | 5.37011  | 0.76561  | -4.70403 | -5.37318 | 0.81388  | 4.67661  | 5.26001  | 1.53585  |
| H  | 3.17086  | 4.23677  | 1.74836  | -3.11607 | -4.25543 | 1.75617  | 2.98842  | 4.14085  | 2.28020  |
| C  | 5.46878  | 5.53940  | -0.40500 | -5.48053 | -5.53531 | -0.33733 | 5.55802  | 5.45492  | 0.46753  |
| H  | 5.80658  | 4.82945  | -2.41585 | -5.86681 | -4.81915 | -2.33747 | 6.10591  | 4.82260  | -1.52290 |
| H  | 4.89733  | 6.01589  | 1.62173  | -4.86237 | -6.01735 | 1.67427  | 4.77594  | 5.85418  | 2.44001  |
| H  | 6.22348  | 6.31848  | -0.46400 | -6.24270 | -6.30825 | -0.37750 | 6.34113  | 6.20466  | 0.53524  |
| Pb | 0.02085  | 0.00001  | 1.17335  | -0.01560 | -0.00004 | 1.08966  | -0.01828 | 0.00001  | -1.09022 |

### PbTPP, total charge 1

|   | Doublet  |          | Quartet  |          |          | Sextet   |          |          |          |
|---|----------|----------|----------|----------|----------|----------|----------|----------|----------|
| N | 2.09014  | -0.00003 | 0.01047  | 2.05006  | -0.01717 | -0.00052 | 2.16641  | 0.00043  | 0.12138  |
| N | -0.00446 | 2.08865  | -0.07251 | 0.01868  | 2.04985  | 0.00056  | 0.03025  | 2.08030  | 0.07678  |
| N | -2.08703 | 0.00003  | -0.15693 | -2.04982 | 0.01750  | 0.00050  | -2.08631 | -0.00040 | -0.03132 |
| N | -0.00453 | -2.08865 | -0.07251 | -0.01803 | -2.04957 | -0.00021 | 0.03105  | -2.08029 | 0.07679  |
| C | 2.88661  | -1.10595 | -0.16255 | 2.89170  | -1.12396 | -0.00086 | 2.98111  | -1.14527 | 0.14885  |
| C | 4.23787  | -0.68345 | -0.44846 | 4.29642  | -0.65606 | -0.00039 | 4.32451  | -0.73344 | 0.05042  |
| C | 4.23789  | 0.68332  | -0.44845 | 4.30618  | 0.58088  | 0.00085  | 4.32423  | 0.73513  | 0.05044  |
| C | 2.88665  | 1.10586  | -0.16255 | 2.91031  | 1.07338  | -0.00051 | 2.98067  | 1.14644  | 0.14888  |
| C | 2.44946  | 2.45804  | -0.18742 | 2.47427  | 2.43185  | 0.00077  | 2.50599  | 2.48227  | 0.19796  |
| C | 1.10052  | 2.90030  | -0.17738 | 1.12389  | 2.89125  | 0.00045  | 1.12069  | 2.89143  | 0.21899  |
| C | 0.67466  | 4.27206  | -0.33467 | 0.65698  | 4.29544  | -0.00018 | 0.69235  | 4.25515  | 0.43828  |
| C | -0.69182 | 4.26635  | -0.35329 | -0.58148 | 4.30627  | 0.00001  | -0.67648 | 4.25691  | 0.40365  |
| C | -1.11148 | 2.89485  | -0.17889 | -1.07257 | 2.91073  | 0.00046  | -1.09868 | 2.89619  | 0.20056  |
| C | -2.46359 | 2.45566  | -0.18870 | -2.43172 | 2.47550  | -0.00049 | -2.45267 | 2.45895  | 0.18624  |
| C | -2.90421 | 1.10529  | -0.18281 | -2.89171 | 1.12336  | 0.00048  | -2.88708 | 1.11242  | 0.13716  |
| C | -4.28660 | 0.68333  | -0.20406 | -4.29566 | 0.65616  | -0.00073 | -4.25659 | 0.67854  | 0.38432  |
| C | -4.28662 | -0.68320 | -0.20406 | -4.30670 | -0.58211 | 0.00001  | -4.25632 | -0.68017 | 0.38435  |
| C | -2.90424 | -1.10521 | -0.18281 | -2.91230 | -1.07306 | -0.00025 | -2.88664 | -1.11351 | 0.13719  |
| C | -2.46367 | -2.45558 | -0.18869 | -2.47483 | -2.43124 | 0.00077  | -2.45171 | -2.45988 | 0.18630  |
| C | -1.11157 | -2.89482 | -0.17889 | -1.12460 | -2.89231 | 0.00072  | -1.09756 | -2.89661 | 0.20059  |
| C | -0.69196 | -4.26633 | -0.35329 | -0.65651 | -4.29637 | -0.00055 | -0.67482 | -4.25717 | 0.40361  |
| C | 0.67452  | -4.27209 | -0.33467 | 0.58132  | -4.30561 | -0.00002 | 0.69401  | -4.25488 | 0.43823  |

|    |          |          |          |          |          |          |          |          |          |
|----|----------|----------|----------|----------|----------|----------|----------|----------|----------|
| C  | 1.10043  | -2.90033 | -0.17738 | 1.07315  | -2.91163 | 0.00003  | 1.12182  | -2.89101 | 0.21893  |
| C  | 2.44938  | -2.45812 | -0.18742 | 2.43219  | -2.47465 | 0.00097  | 2.50696  | -2.48129 | 0.19789  |
| H  | 5.06481  | -1.34057 | -0.67197 | 5.13955  | -1.32192 | -0.00066 | 5.18663  | -1.37280 | -0.07285 |
| H  | 5.06485  | 1.34041  | -0.67197 | 5.13753  | 1.32850  | -0.00042 | 5.18610  | 1.37483  | -0.07281 |
| H  | 1.32636  | 5.12625  | -0.43670 | 1.34910  | 5.13051  | -0.00033 | 1.34674  | 5.09611  | 0.61046  |
| H  | -1.34893 | 5.11069  | -0.49723 | -1.35610 | 5.12809  | -0.00069 | -1.33432 | 5.10309  | 0.53010  |
| H  | -5.14508 | 1.33770  | -0.20859 | -5.13913 | 1.32236  | 0.00059  | -5.08650 | 1.33999  | 0.58336  |
| H  | -5.14512 | -1.33754 | -0.20860 | -5.13741 | -1.32680 | -0.00032 | -5.08597 | -1.34195 | 0.58342  |
| H  | -1.34909 | -5.11066 | -0.49722 | -1.34857 | -5.12928 | -0.00027 | -1.33234 | -5.10361 | 0.53006  |
| H  | 1.32620  | -5.12630 | -0.43669 | 1.35570  | -5.12763 | -0.00071 | 1.34872  | -5.09560 | 0.61039  |
| C  | -3.51008 | 3.51481  | -0.24975 | -3.55108 | 3.54043  | 0.00062  | -3.51756 | 3.49766  | 0.31182  |
| C  | -4.36031 | 3.61849  | -1.36433 | -4.89069 | 3.15116  | 0.00055  | -4.39225 | 3.74176  | -0.75944 |
| C  | -3.65205 | 4.43095  | 0.80691  | -3.21767 | 4.89460  | 0.00030  | -3.67910 | 4.22279  | 1.50390  |
| C  | -5.32925 | 4.62160  | -1.42123 | -5.89810 | 4.11722  | -0.00109 | -5.40181 | 4.70070  | -0.64490 |
| H  | -4.24595 | 2.92316  | -2.19055 | -5.15429 | 2.08305  | -0.00026 | -4.27373 | 3.18406  | -1.68425 |
| C  | -4.63460 | 5.42107  | 0.75550  | -4.22575 | 5.86017  | 0.00048  | -4.69447 | 5.17485  | 1.62011  |
| H  | -2.99981 | 4.35516  | 1.67198  | -2.16294 | 5.20113  | -0.00042 | -3.01588 | 4.02783  | 2.34168  |
| C  | -5.47249 | 5.52118  | -0.35983 | -5.56562 | 5.47174  | 0.00012  | -5.55584 | 5.41812  | 0.54538  |
| H  | -5.97035 | 4.70106  | -2.29391 | -6.95337 | 3.81021  | -0.00177 | -6.06581 | 4.88650  | -1.48379 |
| H  | -4.74445 | 6.11359  | 1.58449  | -3.96186 | 6.92855  | 0.00059  | -4.81464 | 5.72257  | 2.55002  |
| H  | -6.23122 | 6.29658  | -0.40244 | -6.35877 | 6.23304  | 0.00026  | -6.34303 | 6.16041  | 0.63575  |
| C  | 3.51513  | 3.49383  | -0.30598 | 3.54688  | 3.54461  | 0.00074  | 3.53903  | 3.55072  | 0.26459  |
| C  | 3.62087  | 4.29313  | -1.45716 | 3.21206  | 4.89897  | -0.00062 | 3.64652  | 4.50764  | -0.75997 |
| C  | 4.44514  | 3.66427  | 0.73389  | 4.88739  | 3.15637  | 0.00076  | 4.43007  | 3.61693  | 1.35140  |
| C  | 4.63681  | 5.24445  | -1.56375 | 4.21767  | 5.86640  | -0.00052 | 4.62751  | 5.49942  | -0.70354 |
| H  | 2.91855  | 4.15185  | -2.27323 | 2.15505  | 5.20332  | -0.00083 | 2.96305  | 4.46625  | -1.60324 |
| C  | 5.44861  | 4.62943  | 0.63217  | 5.89324  | 4.12397  | -0.00024 | 5.40449  | 4.61588  | 1.41134  |
| H  | 4.37085  | 3.04714  | 1.62452  | 5.15174  | 2.08931  | 0.00172  | 4.34055  | 2.89609  | 2.15942  |
| C  | 5.54862  | 5.41919  | -0.51760 | 5.55731  | 5.47801  | 0.00074  | 5.50787  | 5.55712  | 0.38258  |
| H  | 4.71745  | 5.84624  | -2.46389 | 3.95235  | 6.93275  | -0.00092 | 4.70515  | 6.22588  | -1.50687 |
| H  | 6.15231  | 4.76206  | 1.44832  | 6.94983  | 3.81921  | 0.00074  | 6.07650  | 4.66248  | 2.26302  |
| H  | 6.33426  | 6.16406  | -0.59942 | 6.34977  | 6.24053  | -0.00029 | 6.26625  | 6.33269  | 0.42793  |
| C  | 3.51502  | -3.49394 | -0.30598 | 3.55150  | -3.54030 | 0.00066  | 3.54043  | -3.54933 | 0.26449  |
| C  | 3.62074  | -4.29324 | -1.45716 | 3.21823  | -4.89308 | -0.00032 | 3.64834  | -4.50614 | -0.76013 |
| C  | 4.44503  | -3.66441 | 0.73389  | 4.89049  | -3.15076 | -0.00049 | 4.43147  | -3.61524 | 1.35131  |
| C  | 4.63665  | -5.24459 | -1.56376 | 4.22444  | -5.85939 | 0.00127  | 4.62973  | -5.49752 | -0.70373 |
| H  | 2.91842  | -4.15193 | -2.27324 | 2.16255  | -5.20117 | -0.00026 | 2.96488  | -4.46498 | -1.60341 |
| C  | 5.44847  | -4.62960 | 0.63216  | 5.89759  | -4.11670 | -0.00067 | 5.40628  | -4.61380 | 1.41123  |
| H  | 4.37076  | -3.04728 | 1.62451  | 5.15390  | -2.08327 | -0.00001 | 4.34163  | -2.89449 | 2.15937  |
| C  | 5.54846  | -5.41937 | -0.51761 | 5.56478  | -5.47178 | 0.00051  | 5.51007  | -5.55494 | 0.38242  |
| H  | 4.71727  | -5.84638 | -2.46390 | 3.96237  | -6.92735 | 0.00049  | 4.70769  | -6.22391 | -1.50710 |
| H  | 6.15217  | -4.76225 | 1.44831  | 6.95438  | -4.80998 | -0.00029 | 6.07828  | -4.66018 | 2.26293  |
| H  | 6.33407  | -6.16425 | -0.59943 | 6.35875  | -6.23272 | -0.00099 | 6.26877  | -6.33020 | 0.42775  |
| C  | -3.51019 | -3.51471 | -0.24974 | -3.54663 | -3.54378 | -0.00065 | -3.51620 | -3.49900 | 0.31193  |
| C  | -4.36042 | -3.61836 | -1.36432 | -4.88707 | -3.15692 | -0.00067 | -4.39084 | -3.74344 | -0.75928 |
| C  | -3.65219 | -4.43083 | 0.80692  | -3.21225 | -4.89761 | 0.00061  | -3.67741 | -4.22417 | 1.50403  |
| C  | -5.32940 | -4.62144 | -1.42122 | -5.89220 | -4.12363 | 0.00125  | -5.40002 | -4.70277 | -0.64469 |
| H  | -4.24603 | -2.92304 | -2.19055 | -5.15156 | -2.08860 | 0.00065  | -4.27258 | -3.18571 | -1.68411 |
| C  | -4.63478 | -5.42092 | 0.75551  | -4.21800 | -5.86575 | -0.00012 | -4.69241 | -5.17663 | 1.62030  |
| H  | -2.99995 | -4.35506 | 1.67199  | -2.15668 | -5.20296 | 0.00056  | -3.01423 | -4.02895 | 2.34179  |
| C  | -5.47266 | -5.52101 | -0.35982 | -5.55819 | -5.47761 | -0.00032 | -5.55373 | -5.42024 | 0.54560  |
| H  | -5.97049 | -4.70088 | -2.29391 | -6.94885 | -3.81918 | 0.00167  | -6.06399 | -4.88883 | -1.48354 |
| H  | -4.74465 | -6.11343 | 1.58451  | -3.95319 | -6.93286 | -0.00022 | -4.81232 | -5.72438 | 2.55022  |
| H  | -6.23142 | -6.29639 | -0.40242 | -6.35066 | -6.24048 | -0.00051 | -6.34063 | -6.16283 | 0.63602  |
| Pb | -0.02579 | 0.00001  | 1.14890  | 0.00018  | -0.00044 | -0.00032 | -0.03778 | -0.00005 | -1.16933 |

### H-PbTPP, total charge 0

|   | Doublet  |          |          | Quartet  |          |          | Sextet   |          |         |
|---|----------|----------|----------|----------|----------|----------|----------|----------|---------|
| N | 1.00147  | -1.80162 | -0.07417 | 1.34728  | 1.63548  | -0.13835 | -1.68765 | -1.32696 | 0.15700 |
| N | -1.79103 | -1.06047 | -0.04692 | 1.68098  | -1.32924 | -0.13486 | -1.36721 | 1.63676  | 0.17437 |
| N | -1.00149 | 1.80161  | -0.07412 | -1.27768 | -1.66694 | -0.43172 | 1.61612  | 1.35202  | 0.33872 |
| N | 1.79102  | 1.06046  | -0.04689 | -1.60080 | 1.34831  | -0.40398 | 1.30066  | -1.64566 | 0.36003 |
| C | 2.28418  | -1.91574 | -0.61399 | 1.01679  | 2.96002  | 0.02610  | -1.63480 | -2.68216 | 0.20158 |
| C | 2.54263  | -3.31195 | -0.79599 | 2.21007  | 3.74545  | -0.05100 | -2.91587 | -3.21637 | 0.58544 |
| C | 1.44069  | -4.00990 | -0.35887 | 3.25842  | 2.88075  | -0.27431 | -3.75030 | -2.14113 | 0.77026 |
| C | 0.46410  | -3.05688 | 0.08933  | 2.72699  | 1.55546  | -0.31478 | -2.98383 | -0.95559 | 0.48483 |
| C | -0.89105 | -3.32308 | 0.49209  | 3.47629  | 0.37594  | -0.49993 | -3.47251 | 0.36441  | 0.56744 |
| C | -1.92113 | -2.42709 | 0.00675  | 2.98656  | -0.94304 | -0.45265 | -2.72980 | 1.55406  | 0.40880 |
| C | -3.16013 | -2.77289 | -0.61909 | 3.74320  | -2.12354 | -0.71147 | -3.27550 | 2.88666  | 0.48352 |
| C | -3.75860 | -1.60449 | -1.04600 | 2.90941  | -3.20630 | -0.51531 | -2.23732 | 3.76090  | 0.28428 |

|    |          |          |          |          |          |          |          |          |          |
|----|----------|----------|----------|----------|----------|----------|----------|----------|----------|
| C  | -2.91214 | -0.51777 | -0.67688 | 1.62863  | -2.69498 | -0.15511 | -1.05253 | 2.95991  | 0.09350  |
| C  | -3.15896 | 0.85379  | -0.90009 | 0.40922  | -3.46173 | 0.03620  | 0.30010  | 3.43647  | -0.03592 |
| C  | -2.28420 | 1.91575  | -0.61395 | -0.80964 | -2.96468 | -0.59513 | 1.33523  | 2.64773  | 0.65549  |
| C  | -2.54265 | 3.31196  | -0.79591 | -1.69403 | -3.64605 | -1.43804 | 2.17933  | 3.08277  | 1.72493  |
| C  | -1.44071 | 4.00990  | -0.35878 | -2.73333 | -2.75777 | -1.76556 | 3.01732  | 2.02286  | 2.02097  |
| C  | -0.46411 | 3.05687  | 0.08939  | -2.48681 | -1.54475 | -1.10763 | 2.67963  | 0.95941  | 1.11903  |
| C  | 0.89104  | 3.32306  | 0.49215  | -3.33203 | -0.35474 | -1.04623 | 3.33808  | -0.33658 | 1.00112  |
| C  | 1.92112  | 2.42707  | 0.00679  | -2.71367 | 0.96629  | -1.14596 | 2.45609  | -1.49172 | 1.09808  |
| C  | 3.16014  | 2.77289  | -0.61900 | -3.13879 | 2.07682  | -1.88532 | 2.62463  | -2.63504 | 1.94264  |
| C  | 3.75860  | 1.60450  | -1.04594 | -2.31165 | 3.16299  | -1.54664 | 1.58670  | -3.50652 | 1.65601  |
| C  | 2.91213  | 0.51777  | -0.67686 | -1.37772 | 2.70408  | -0.61229 | 0.79377  | -2.87837 | 0.64956  |
| C  | 3.15894  | -0.85379 | -0.90011 | -0.33227 | 3.44981  | 0.08822  | -0.40977 | -3.43037 | 0.00351  |
| H  | 3.44291  | -3.72266 | -1.22922 | 2.24718  | 4.82425  | -0.02455 | -3.13164 | -4.26126 | 0.75789  |
| H  | 1.28253  | -5.07666 | -0.41386 | 4.29763  | 3.13809  | -0.41619 | -4.77771 | -2.15747 | 1.10409  |
| H  | -3.50321 | -3.77902 | -0.80670 | 4.77457  | -2.14188 | -1.03169 | -4.30922 | 3.13188  | 0.67932  |
| H  | -4.68175 | -1.50939 | -1.59920 | 3.13881  | -4.24976 | -0.67365 | -2.26510 | 4.84015  | 0.32822  |
| H  | -3.44293 | 3.72268  | -1.22913 | -1.56476 | -4.65876 | -1.79345 | 2.13604  | 4.05194  | 2.20289  |
| H  | -1.28255 | 5.07665  | -0.41374 | -3.56435 | -2.94852 | -2.42915 | 3.77937  | 1.97077  | 2.78592  |
| H  | 3.50323  | 3.77903  | -0.80656 | -3.94630 | 2.07593  | -2.60344 | 3.41361  | -2.75940 | 2.67093  |
| H  | 4.68176  | 1.50941  | -1.59912 | -2.35218 | 4.16023  | -1.96117 | 1.38288  | -4.47007 | 2.10272  |
| C  | -4.48246 | 1.20673  | -1.50215 | 0.42675  | -4.72214 | 0.75691  | 0.63235  | 4.67124  | -0.71719 |
| C  | -4.55590 | 1.73949  | -2.79888 | -0.73520 | -5.53856 | 0.87196  | 1.92154  | 5.26463  | -0.61412 |
| C  | -5.67178 | 1.00479  | -0.78447 | 1.57993  | -5.16493 | 1.46918  | -0.29384 | 5.30619  | -1.59307 |
| C  | -5.79111 | 2.06495  | -3.36498 | -0.71774 | -6.73667 | 1.57714  | 2.23556  | 6.43954  | -1.28892 |
| H  | -3.63911 | 1.89062  | -3.36126 | -1.66165 | -5.21208 | 0.41892  | 2.68032  | 4.79250  | -0.00216 |
| C  | -6.90696 | 1.33455  | -1.34777 | 1.58774  | -6.36296 | 2.17447  | 0.02809  | 6.48102  | -2.26337 |
| H  | -5.62053 | 0.59221  | 0.21885  | 2.46669  | -4.54471 | 1.49460  | -1.25821 | 4.84682  | -1.77465 |
| C  | -6.97019 | 1.86508  | -2.64019 | 0.44577  | -7.17241 | 2.22341  | 1.29059  | 7.06851  | -2.10927 |
| H  | -5.83178 | 2.47086  | -4.37184 | -1.62572 | -7.33085 | 1.63423  | 3.22871  | 6.86632  | -1.17876 |
| H  | -7.81811 | 1.17835  | -0.77713 | 2.48867  | -6.66113 | 2.70386  | -0.70438 | 6.93307  | -2.92660 |
| H  | -7.93059 | 2.11952  | -3.07936 | 0.45496  | -8.10821 | 2.77425  | 1.53995  | 7.98527  | -2.63514 |
| C  | -1.21863 | -4.53579 | 1.25570  | 4.93712  | 0.54125  | -0.77125 | -4.92820 | 0.51613  | 0.88043  |
| C  | -2.55242 | -4.93285 | 1.53557  | 5.89150  | 0.10499  | 0.16115  | -5.33909 | 1.02984  | 2.12029  |
| C  | -0.20046 | -5.31596 | 1.86695  | 5.37502  | 1.13313  | -1.96668 | -5.90253 | 0.13863  | -0.05623 |
| C  | -2.83921 | -6.07335 | 2.28273  | 7.25586  | 0.26362  | -0.09325 | -6.69767 | 1.16193  | 2.41774  |
| H  | -3.38128 | -4.32876 | 1.19451  | 5.55673  | -0.35261 | 1.08732  | -4.58762 | 1.31695  | 2.84983  |
| C  | -0.49089 | -6.45636 | 2.61180  | 6.73953  | 1.28241  | -2.22543 | -7.26117 | 0.27968  | 0.23742  |
| H  | 0.83362  | -5.00458 | 1.79248  | 4.63995  | 1.46737  | -2.69282 | -5.58844 | -0.26107 | -1.01597 |
| C  | -1.81384 | -6.86229 | 2.81293  | 7.68355  | 0.85067  | -1.28826 | -7.66238 | 0.78993  | 1.47605  |
| H  | -3.87786 | -6.33778 | 2.46315  | 7.98301  | -0.07103 | 0.64110  | -7.00129 | 1.55345  | 3.38446  |
| H  | 0.32567  | -7.01919 | 3.05645  | 7.06401  | 1.73391  | -3.15859 | -8.00438 | -0.00954 | -0.50021 |
| H  | -2.04045 | -7.75022 | 3.39550  | 8.74449  | 0.97016  | -1.48811 | -8.71865 | 0.89567  | 1.70620  |
| C  | 4.48245  | -1.20672 | -1.50217 | -0.63337 | 4.69114  | 0.80071  | -0.38267 | -4.70525 | -0.67318 |
| C  | 5.67177  | -1.00479 | -0.78449 | -1.85948 | 5.38888  | 0.63773  | 0.79075  | -5.51289 | -0.70727 |
| C  | 4.55589  | -1.73946 | -2.79890 | 0.26237  | 5.20904  | 1.77753  | -1.50668 | -5.18154 | -1.40989 |
| C  | 6.90695  | -1.33454 | -1.34778 | -2.12968 | 6.56072  | 1.33828  | 0.81455  | -6.72928 | -1.37959 |
| H  | 5.62051  | -0.59222 | 0.21884  | -2.61258 | 4.99931  | -0.03223 | 1.68799  | -5.17078 | -0.20582 |
| C  | 5.79110  | -2.06492 | -3.36500 | -0.01587 | 6.37744  | 2.47994  | -1.47361 | -6.40027 | -2.07701 |
| H  | 3.63910  | -1.89058 | -3.36129 | 1.16668  | 4.66392  | 2.01783  | -2.39762 | -4.56889 | -1.48010 |
| C  | 6.97019  | -1.86505 | -2.64021 | -1.20718 | 7.07659  | 2.25542  | -0.31867 | -7.19417 | -2.06020 |
| H  | 7.81810  | -1.17835 | -0.77714 | -3.07579 | 7.06928  | 1.17462  | 1.72694  | -7.31940 | -1.37846 |
| H  | 5.83177  | -2.47081 | -4.37187 | 0.69367  | 6.73339  | 3.22188  | -2.35004 | -6.72855 | -2.62919 |
| H  | 7.93058  | -2.11949 | -3.07938 | -1.42415 | 7.98856  | 2.80365  | -0.29601 | -8.14540 | -2.58347 |
| C  | 1.21864  | 4.53578  | 1.25571  | -4.76860 | -0.47965 | -0.85354 | 4.77549  | -0.46367 | 0.94818  |
| C  | 0.20049  | 5.31601  | 1.86692  | -5.40048 | -1.74347 | -0.64775 | 5.63155  | 0.67621  | 0.91023  |
| C  | 2.55245  | 4.93281  | 1.53556  | -5.62565 | 0.65853  | -0.76198 | 5.41498  | -1.73351 | 0.83799  |
| C  | 0.49095  | 6.45643  | 2.61173  | -6.77110 | -1.85801 | -0.44570 | 7.01385  | 0.54922  | 0.83394  |
| H  | -0.83361 | 5.00466  | 1.79245  | -4.79920 | -2.64127 | -0.61480 | 5.19953  | 1.66974  | 0.91759  |
| C  | 2.83927  | 6.07333  | 2.28267  | -6.99572 | 0.53493  | -0.56150 | 6.79810  | -1.85040 | 0.67158  |
| H  | 3.38128  | 4.32869  | 1.19451  | -5.20232 | 1.65138  | -0.82148 | 4.81186  | -2.63191 | 0.78568  |
| C  | 1.81392  | 6.86233  | 2.81284  | -7.59223 | -0.72397 | -0.41853 | 7.61771  | -0.71383 | 0.77422  |
| H  | -0.32559 | 7.01930  | 3.05635  | -7.20155 | -2.84450 | -0.29403 | 7.62778  | 1.44582  | 0.80930  |
| H  | 3.87793  | 6.33775  | 2.46307  | -7.60354 | 1.43410  | -0.50257 | 7.24253  | -2.83885 | 0.67883  |
| H  | 2.04055  | 7.75027  | 3.39537  | -8.66319 | -0.81705 | -0.26445 | 8.69782  | -0.80915 | 0.71608  |
| Pb | -0.00001 | -0.00001 | 0.73447  | -0.10171 | -0.02819 | 0.47876  | 0.09458  | -0.02624 | -0.99603 |
| H  | -0.00001 | -0.00004 | 2.44837  | -0.13935 | -0.03312 | 2.19576  | -0.83722 | 0.13482  | 2.51134  |



**PdTPP, total charge 0**

|   | Singlet  |          | Triplet  |          |          | Quintet  |          |          |          |
|---|----------|----------|----------|----------|----------|----------|----------|----------|----------|
| N | -2.04266 | 0.00000  | -0.01187 | 0.00020  | -2.05723 | -0.02317 | 2.06189  | 0.00000  | -0.04201 |
| N | 0.00001  | 2.04284  | 0.00009  | -2.06164 | -0.00020 | -0.00001 | 0.00000  | -2.06240 | -0.00002 |
| N | 2.04268  | 0.00000  | 0.01204  | -0.00020 | 2.05722  | 0.02317  | -2.06189 | 0.00000  | 0.04198  |
| N | 0.00001  | -2.04285 | 0.00009  | 2.06164  | 0.00019  | 0.00000  | 0.00000  | 2.06241  | -0.00002 |
| C | -2.86046 | -1.10739 | 0.01368  | 1.10434  | -2.87984 | 0.02010  | 2.88247  | 1.10774  | 0.00741  |
| C | -4.24074 | -0.68073 | 0.06653  | 0.69297  | -4.23662 | 0.10322  | 4.25761  | 0.68427  | 0.09643  |
| C | -4.24074 | 0.68074  | 0.06653  | -0.69217 | -4.23675 | 0.10319  | 4.25761  | -0.68426 | 0.09647  |
| C | -2.86046 | 1.10740  | 0.01368  | -1.10380 | -2.88004 | 0.02006  | 2.88247  | -1.10774 | 0.00745  |
| C | -2.44548 | 2.44560  | 0.01484  | -2.46626 | -2.44204 | 0.01904  | 2.46109  | -2.46149 | 0.01162  |
| C | -1.10745 | 2.86103  | 0.00733  | -2.88180 | -1.10892 | 0.01157  | 1.10793  | -2.88422 | 0.00809  |
| C | -0.68073 | 4.24225  | -0.00029 | -4.26522 | -0.67997 | -0.00068 | 0.68423  | -4.26215 | -0.00225 |
| C | 0.68075  | 4.24225  | 0.00031  | -4.26535 | 0.67917  | 0.00057  | -0.68423 | -4.26215 | 0.00225  |
| C | 1.10747  | 2.86102  | -0.00723 | -2.88201 | 1.10838  | -0.01162 | -1.10793 | -2.88422 | -0.00810 |
| C | 2.44550  | 2.44559  | -0.01476 | -2.46672 | 2.44157  | -0.01904 | -2.46109 | -2.46149 | -0.01163 |
| C | 2.86047  | 1.10739  | -0.01358 | -1.10434 | 2.87984  | -0.02000 | -2.88247 | -1.10774 | -0.00747 |
| C | 4.24075  | 0.68073  | -0.06652 | -0.69297 | 4.23663  | -0.10305 | -4.25761 | -0.68426 | -0.09647 |
| C | 4.24075  | -0.68073 | -0.06652 | 0.69217  | 4.23676  | -0.10307 | -4.25761 | 0.68427  | -0.09643 |
| C | 2.86047  | -1.10740 | -0.01358 | 1.10379  | 2.88005  | -0.02004 | -2.88247 | 1.10774  | -0.00742 |
| C | 2.44550  | -2.44560 | -0.01476 | 2.46625  | 2.44204  | -0.01912 | -2.46109 | 2.46149  | -0.01154 |
| C | 1.10746  | -2.86103 | -0.00723 | 2.88179  | 1.10892  | -0.01166 | -1.10793 | 2.88423  | -0.00805 |
| C | 0.68074  | -4.24225 | 0.00031  | 4.26522  | 0.67998  | 0.00054  | -0.68423 | 4.26216  | 0.00228  |
| C | -0.68074 | -4.24225 | -0.00029 | 4.26535  | -0.67916 | -0.00065 | 0.68423  | 4.26216  | -0.00228 |
| C | -1.10746 | -2.86103 | 0.00734  | 2.88201  | -1.10838 | 0.01162  | 1.10793  | 2.88422  | 0.00804  |
| C | -2.44549 | -2.44559 | 0.01484  | 2.46672  | -2.44157 | 0.01912  | 2.46109  | 2.46149  | 0.01153  |
| H | -5.09060 | -1.34544 | 0.11170  | 1.35145  | -5.08895 | 0.17263  | 5.10598  | 1.34699  | 0.17352  |
| H | -5.09060 | 1.34546  | 0.11170  | -1.35050 | -5.08920 | 0.17258  | 5.10598  | -1.34698 | 0.17358  |
| H | -1.34519 | 5.09345  | -0.00485 | -5.11802 | -1.34178 | -0.00930 | 1.34636  | -5.11426 | -0.01549 |
| H | 1.34521  | 5.09345  | 0.00479  | -5.11828 | 1.34082  | 0.00916  | -1.34636 | -5.11426 | 0.01551  |
| H | 5.09061  | 1.34545  | -0.11176 | -1.35146 | 5.08896  | -0.17238 | -5.10598 | -1.34698 | -0.17357 |
| H | 5.09061  | -1.34545 | -0.11176 | 1.35049  | 5.08921  | -0.17243 | -5.10598 | 1.34699  | -0.17351 |
| H | 1.34520  | -5.09346 | 0.00479  | 5.11802  | 1.34179  | 0.00910  | -1.34636 | 5.11427  | 0.01557  |
| H | -1.34520 | -5.09346 | -0.00485 | 5.11827  | -1.34081 | -0.00925 | 1.34636  | 5.11427  | -0.01555 |
| C | 3.50527  | 3.50329  | -0.02941 | -3.51603 | 3.50141  | -0.03615 | -3.51734 | -3.51250 | -0.03346 |
| C | 4.27402  | 3.75806  | 1.11646  | -3.69089 | 4.34679  | 1.07193  | -4.37134 | -3.69048 | 1.06802  |
| C | 3.74802  | 4.25505  | -1.18912 | -4.34067 | 3.67598  | -1.15911 | -3.68250 | -4.34182 | -1.15557 |
| C | 5.26385  | 4.74449  | 1.10419  | -4.67752 | 5.33483  | 1.06199  | -5.36241 | -4.67476 | 1.04989  |
| H | 4.08865  | 3.17984  | 2.01718  | -3.05208 | 4.21936  | 1.94076  | -4.24842 | -3.05474 | 1.94011  |
| C | 4.73857  | 5.24070  | -1.20349 | -5.32136 | 4.67114  | -1.17275 | -4.67658 | -5.32302 | -1.17647 |
| H | 3.15752  | 4.05947  | -2.07964 | -4.20318 | 3.03137  | -2.02229 | -3.02988 | -4.20695 | -2.01327 |
| C | 5.49906  | 5.48844  | -0.05634 | -5.49466 | 5.50137  | -0.06130 | -5.51897 | -5.49364 | -0.07308 |
| H | 5.84847  | 4.93242  | 2.00042  | -4.80773 | 5.97408  | 1.93066  | -6.00954 | -4.80324 | 1.91306  |
| H | 4.91704  | 5.81202  | -2.11016 | -4.79783 | 4.79783  | -2.05161 | -4.79477 | -5.95098 | -2.05512 |
| H | 6.26878  | 6.25490  | -0.06675 | -6.25912 | 6.27302  | -0.07034 | -6.29082 | -6.25781 | -0.08837 |
| C | -3.50526 | 3.50328  | 0.02938  | -3.51537 | -3.50208 | 0.03615  | 3.51734  | -3.51250 | 0.03347  |
| C | -3.74811 | 4.25508  | 1.18903  | -4.34003 | -3.67675 | 1.15908  | 3.68249  | -4.34181 | 1.15560  |
| C | -4.27394 | 3.75799  | -1.11656 | -3.69001 | -4.34754 | -1.07189 | 4.37135  | -3.69049 | -1.06800 |
| C | -4.73867 | 5.24072  | 1.20330  | -5.32052 | -4.67210 | 1.17272  | 4.67657  | -5.32301 | 1.17651  |
| H | -3.15767 | 4.05955  | 2.07961  | -4.20270 | -3.03207 | 2.02223  | 3.02986  | -4.20693 | 2.01329  |
| C | -5.26378 | 4.74442  | -1.10440 | -4.67644 | -5.33578 | -1.06195 | 5.36242  | -4.67477 | -1.04985 |
| H | -4.08850 | 3.17974  | -2.01724 | -3.05118 | -4.22003 | -1.94070 | 4.24844  | -3.05476 | -1.94010 |
| C | -5.49909 | 5.48841  | 0.05608  | -5.49361 | -5.50242 | 0.06130  | 5.51896  | -5.49364 | 0.07313  |
| H | -4.91722 | 5.81208  | 2.10993  | -5.94641 | -4.79887 | 2.05156  | 4.79475  | -5.95096 | 2.05517  |
| H | -5.84834 | 4.93229  | -2.00068 | -4.80648 | -5.97510 | -1.93059 | 6.00955  | -4.80327 | -1.91301 |
| H | -6.26881 | 6.25485  | 0.06640  | -6.25792 | -6.27422 | 0.07035  | 6.29081  | -6.25781 | 0.08844  |
| C | -3.50527 | -3.50328 | 0.02938  | 3.51603  | -3.50141 | 0.03629  | 3.51735  | 3.51250  | 0.03331  |
| C | -3.74812 | -4.25507 | 1.18904  | 4.34071  | -3.67587 | 1.15924  | 3.68254  | 4.34185  | 1.15540  |
| C | -4.27395 | -3.75799 | -1.11655 | 3.69086  | -4.34688 | -1.07172 | 4.37131  | 3.69045  | -1.06819 |
| C | -4.73869 | -5.24070 | 1.20331  | 5.32140  | -4.67102 | 1.17293  | 4.67663  | 5.32304  | 1.17625  |
| H | -3.15769 | -4.05954 | 2.07962  | 4.20325  | -3.03119 | 2.02236  | 3.02994  | 4.20700  | 2.01312  |
| C | -5.26379 | -4.74441 | -1.10439 | 4.67749  | -5.33492 | -1.06172 | 5.36240  | 4.67472  | -1.05011 |
| H | -4.08851 | -3.17974 | -2.01723 | 3.05202  | -4.21953 | -1.94054 | 4.24837  | 3.05469  | -1.94027 |
| C | -5.49911 | -5.48839 | 0.05610  | 5.49467  | -5.50135 | 0.06155  | 5.51899  | 5.49363  | 0.07284  |
| H | -4.91724 | -5.81206 | 2.10995  | 5.94731  | -4.79764 | 2.05179  | 4.79484  | 5.95102  | 2.05489  |
| H | -5.84836 | -4.93228 | -2.00067 | 4.80767  | -5.97424 | -1.93034 | 6.00950  | 4.80319  | -1.91330 |
| H | -6.26883 | -6.25483 | 0.06642  | 6.25914  | -6.27300 | 0.07064  | 6.29084  | 6.25779  | 0.08809  |
| C | 3.50527  | -3.50329 | -0.02942 | 3.51537  | 3.50208  | -0.03629 | -3.51735 | 3.51250  | -0.03329 |
| C | 4.27402  | -3.75807 | 1.11645  | 3.69011  | 4.34750  | 1.07177  | -4.37130 | 3.69044  | 1.06822  |
| C | 3.74802  | -4.25505 | -1.18912 | 4.33993  | 3.67677  | -1.15928 | -3.68255 | 4.34186  | -1.15538 |

|    |         |          |          |         |         |          |          |         |          |
|----|---------|----------|----------|---------|---------|----------|----------|---------|----------|
| C  | 5.26385 | -4.74450 | 1.10418  | 4.67655 | 5.33574 | 1.06177  | -5.36239 | 4.67471 | 1.05015  |
| H  | 4.08865 | -3.17986 | 2.01717  | 3.05136 | 4.21997 | 1.94063  | -4.24835 | 3.05467 | 1.94028  |
| C  | 4.73857 | -5.24070 | -1.20350 | 5.32042 | 4.67211 | -1.17298 | -4.67664 | 5.32305 | -1.17621 |
| H  | 3.15752 | -4.05947 | -2.07965 | 4.20252 | 3.03212 | -2.02244 | -3.02996 | 4.20702 | -2.01311 |
| C  | 5.49906 | -5.48845 | -0.05635 | 5.49362 | 5.50240 | -0.06156 | -5.51899 | 5.49363 | -0.07279 |
| H  | 5.84847 | -4.93243 | 2.00041  | 4.80667 | 5.97502 | 1.93042  | -6.00948 | 4.80316 | 1.91335  |
| H  | 4.91704 | -5.81202 | -2.11018 | 5.94624 | 4.79891 | -2.05187 | -4.79486 | 5.95104 | -2.05484 |
| H  | 6.26878 | -6.25490 | -0.06676 | 6.25794 | 6.27420 | -0.07065 | -6.29085 | 6.25779 | -0.08802 |
| Pd | 0.00001 | 0.00000  | 0.00014  | 0.00000 | 0.00000 | -0.00002 | 0.00000  | 0.00000 | -0.00004 |

### PdTPP, total charge 1

|   | Doublet  |          |          | Quartet  |          |          | Sextet   |          |          |
|---|----------|----------|----------|----------|----------|----------|----------|----------|----------|
| N | 2.04909  | 0.00000  | -0.04165 | -2.05373 | -0.00008 | -0.05668 | 2.06881  | 0.00747  | -0.05428 |
| N | 0.00001  | -2.04946 | -0.00005 | -0.00007 | 2.04987  | 0.00000  | 0.00008  | -2.01854 | -0.00011 |
| N | -2.04908 | -0.00001 | 0.04153  | 2.05373  | 0.00007  | 0.05668  | -2.06880 | 0.00732  | 0.05424  |
| N | 0.00000  | 2.04945  | -0.00006 | 0.00007  | -2.04989 | 0.00001  | -0.00007 | 2.03438  | -0.00014 |
| C | 2.86827  | 1.10264  | 0.00608  | -2.87197 | -1.10768 | -0.00163 | 2.89505  | 1.10000  | -0.00139 |
| C | 4.24304  | 0.68181  | 0.10261  | -4.26596 | -0.67489 | 0.09861  | 4.26984  | 0.67253  | 0.09005  |
| C | 4.24304  | -0.68181 | 0.10258  | -4.26601 | 0.67455  | 0.09877  | 4.26437  | -0.69356 | 0.09165  |
| C | 2.86827  | -1.10265 | 0.00603  | -2.87206 | 1.10746  | -0.00140 | 2.89171  | -1.11143 | 0.00020  |
| C | 2.44974  | -2.45005 | 0.01470  | -2.47094 | 2.44295  | 0.01265  | 2.46718  | -2.45867 | 0.00440  |
| C | 1.10281  | -2.86993 | 0.00896  | -1.10194 | 2.87211  | 0.00828  | 1.11717  | -2.85508 | 0.00347  |
| C | 0.68176  | -4.24791 | -0.00474 | -0.68570 | 4.24638  | -0.00376 | 0.68399  | -4.22598 | -0.00641 |
| C | -0.68175 | -4.24791 | 0.00483  | 0.68541  | 4.24643  | 0.00384  | -0.68366 | -4.22603 | 0.00627  |
| C | -1.10281 | -2.86993 | -0.00897 | 1.10174  | 2.87218  | -0.00825 | -1.11695 | -2.85516 | -0.00360 |
| C | -2.44972 | -2.45006 | -0.01473 | 2.47077  | 2.44312  | -0.01264 | -2.46699 | -2.45885 | -0.00444 |
| C | -2.86826 | -1.10265 | -0.00610 | 2.87198  | 1.10766  | 0.00138  | -2.89162 | -1.11164 | -0.00019 |
| C | -4.24303 | -0.68182 | -0.10264 | 4.26596  | 0.67484  | -0.09883 | -4.26432 | -0.69389 | -0.09151 |
| C | -4.24304 | 0.68180  | -0.10268 | 4.26600  | -0.67460 | -0.09867 | -4.26989 | 0.67220  | -0.08992 |
| C | -2.86827 | 1.10264  | -0.00616 | 2.87205  | -1.10748 | 0.00161  | -2.89513 | 1.09978  | 0.00139  |
| C | -2.44973 | 2.45005  | -0.01483 | 2.47094  | -2.44297 | -0.01223 | -2.48464 | 2.46228  | -0.00974 |
| C | -1.10281 | 2.86992  | -0.00903 | 1.10194  | -2.87213 | -0.00803 | -1.13722 | 2.87952  | -0.00723 |
| C | -0.68176 | 4.24790  | 0.00478  | 0.68570  | -4.24641 | 0.00399  | -0.70861 | 4.21904  | 0.00738  |
| C | 0.68176  | 4.24791  | -0.00471 | -0.68541 | -4.24645 | -0.00390 | 0.70829  | 4.21910  | -0.00757 |
| C | 1.10281  | 2.86993  | 0.00900  | -1.10174 | -2.87221 | 0.00807  | 1.13701  | 2.87960  | 0.00708  |
| C | 2.44973  | 2.45006  | 0.01478  | -2.47077 | -2.44314 | 0.01224  | 2.48446  | 2.46246  | 0.00970  |
| H | 5.09168  | 1.34253  | 0.18896  | -5.11033 | -1.34074 | 0.19062  | 5.11816  | 1.33455  | 0.16950  |
| H | 5.09169  | -1.34254 | 0.18889  | -5.11043 | 1.34033  | 0.19094  | 5.10823  | -1.36151 | 0.16974  |
| H | 1.34187  | -5.10113 | -0.02168 | -1.34745 | 5.09810  | -0.02164 | 1.34416  | -5.07944 | -0.02398 |
| H | -1.34186 | -5.10113 | 0.02185  | 1.34710  | 5.09819  | 0.02176  | -1.34377 | -5.07954 | 0.02388  |
| H | -5.09168 | -1.34255 | -0.18892 | 5.11033  | 1.34068  | -0.19102 | -5.10813 | -1.36190 | -0.16954 |
| H | -5.09169 | 1.34252  | -0.18900 | 5.11042  | -1.34040 | -0.19070 | -5.11827 | 1.33417  | -0.16930 |
| H | -1.34187 | 5.10112  | 0.02177  | 1.34744  | -5.09813 | 0.02205  | -1.35657 | 5.08172  | 0.03624  |
| H | 1.34186  | 5.10113  | -0.02162 | -1.34709 | -5.09822 | -0.02193 | 1.35620  | 5.08182  | -0.03638 |
| C | -3.50508 | -3.49986 | -0.03715 | 3.52097  | 3.49774  | -0.03619 | -3.51378 | -3.51891 | -0.02394 |
| C | -4.39060 | -3.63796 | 1.04589  | 4.39598  | 3.65282  | 1.05263  | -4.35869 | -3.70076 | 1.08378  |
| C | -3.63096 | -4.36065 | -1.14143 | 3.65240  | 4.34934  | -1.14707 | -3.67449 | -4.34373 | -1.14992 |
| C | -5.37535 | -4.62687 | 1.02831  | 5.38159  | 4.64207  | 1.03129  | -5.33984 | -4.69459 | 1.06792  |
| H | -4.29267 | -2.98013 | 1.90434  | 4.29072  | 3.00624  | 1.91907  | -4.23621 | -3.06889 | 1.95880  |
| C | -4.62987 | -5.33512 | -1.16386 | 4.64731  | 5.32795  | -1.17131 | -4.66310 | -5.33009 | -1.16754 |
| H | -2.95677 | -4.25056 | -1.98557 | 2.98427  | 4.23029  | -1.99506 | -3.03242 | -4.19999 | -2.01435 |
| C | -5.50028 | -5.47394 | -0.07773 | 5.51155  | 5.47890  | -0.08131 | -5.49552 | -5.50952 | -0.05798 |
| H | -6.04388 | -4.73523 | 1.87690  | 6.04463  | 4.75954  | 1.88305  | -5.98007 | -4.83273 | 1.93397  |
| H | -4.72841 | -5.98426 | -2.02854 | 4.74899  | 5.97026  | -2.04080 | -4.78479 | -5.95455 | -2.04748 |
| H | -6.27187 | -6.23756 | -0.09342 | 6.28095  | 6.24467  | -0.09933 | -6.26131 | -6.27904 | -0.07111 |
| C | 3.50509  | -3.49985 | 0.03720  | -3.52121 | 3.49750  | 0.03619  | 3.51405  | -3.51865 | 0.02398  |
| C | 3.63095  | -4.36057 | 1.14153  | -3.65275 | 4.34905  | 1.14709  | 3.67472  | -4.34346 | 1.14997  |
| C | 4.39061  | -3.63803 | -1.04584 | -4.39619 | 3.65255  | -1.05266 | 4.35906  | -3.70044 | -1.08367 |
| C | 4.62986  | -5.33505 | 1.16402  | -4.64773 | 5.32759  | 1.17133  | 4.66340  | -5.32974 | 1.16767  |
| H | 2.95676  | -4.25043 | 1.98566  | -2.98464 | 4.23001  | 1.99510  | 3.03258  | -4.19977 | 2.01435  |
| C | 5.37535  | -4.62695 | -1.02819 | 5.38187  | 4.64174  | -1.03133 | 5.34027  | -4.69420 | -1.06774 |
| H | 4.29268  | -2.98026 | -1.90433 | -4.29085 | 3.00601  | -1.91912 | 4.23659  | -3.06858 | -1.95871 |
| C | 5.50028  | -5.47395 | 0.07790  | -5.51193 | 5.47852  | 0.08130  | 5.49593  | -5.50912 | 0.05818  |
| H | 4.72839  | -5.98413 | 2.02875  | -4.74948 | 5.96986  | 2.04083  | 4.78507  | -5.95419 | 2.04761  |
| H | 6.04389  | -4.73536 | -1.87677 | -6.04488 | 4.75920  | -1.88311 | 5.98058  | -4.83230 | -1.93374 |
| H | 6.27185  | -6.23757 | 0.09366  | -6.28139 | 6.24423  | 0.09931  | 6.26177  | -6.27858 | 0.07136  |
| C | 3.50508  | 3.49986  | 0.03736  | -3.52099 | -3.49775 | 0.03543  | 3.53717  | 3.51314  | 0.04183  |
| C | 3.63089  | 4.36054  | 1.14173  | -3.65270 | -4.34947 | 1.14618  | 3.67979  | 4.34766  | 1.16431  |
| C | 4.39065  | 3.63808  | -1.04562 | -4.39577 | -3.65265 | -1.05359 | 4.40695  | 3.68240  | -1.04926 |
| C | 4.62979  | 5.33502  | 1.16431  | -4.64766 | -5.32806 | 1.17008  | 4.67347  | 5.32844  | 1.19520  |

|    |          |         |          |          |          |          |          |         |          |
|----|----------|---------|----------|----------|----------|----------|----------|---------|----------|
| H  | 2.95665  | 4.25036 | 1.98583  | -2.98476 | -4.23055 | 1.99434  | 3.02128  | 4.21271 | 2.01784  |
| C  | 5.37538  | 4.62700 | -1.02790 | -5.38143 | -4.64188 | -1.03260 | 5.39287  | 4.67083 | -1.02056 |
| H  | 4.29276  | 2.98034 | -1.90415 | -4.29031 | -3.00596 | -1.91993 | 4.30069  | 3.04379 | -1.92154 |
| C  | 5.50025  | 5.47396 | 0.07824  | -5.51166 | -5.47884 | 0.07987  | 5.52980  | 5.49427 | 0.10195  |
| H  | 4.72828  | 5.98407 | 2.02907  | -4.74955 | -5.97047 | 2.03947  | 4.78133  | 5.95827 | 2.07312  |
| H  | 6.04395  | 4.73545 | -1.87644 | -6.04428 | -4.75921 | -1.88451 | 6.05192  | 4.79849 | -1.87402 |
| H  | 6.27183  | 6.23759 | 0.09405  | -6.28109 | -6.24458 | 0.09763  | 6.30013  | 6.25898 | 0.12513  |
| C  | -3.50508 | 3.49985 | -0.03733 | 3.52124  | -3.49751 | -0.03544 | -3.53744 | 3.51287 | -0.04178 |
| C  | -4.39064 | 3.63800 | 1.04568  | 4.39606  | -3.65232 | 1.05356  | -4.40712 | 3.68208 | 1.04938  |
| C  | -3.63090 | 4.36061 | -1.14163 | 3.65297  | -4.34925 | -1.14617 | -3.68022 | 4.34736 | -1.16426 |
| C  | -5.37538 | 4.62692 | 1.02803  | 5.38178  | -4.64148 | 1.03256  | -5.39312 | 4.67044 | 1.02077  |
| H  | -4.29274 | 2.98020 | 1.90416  | 4.29058  | -3.00562 | 1.91989  | -4.30073 | 3.04349 | 1.92167  |
| C  | -4.62981 | 5.33509 | -1.16413 | 4.64799  | -5.32776 | -1.17008 | -4.67399 | 5.32807 | -1.19507 |
| H  | -2.95668 | 4.25049 | -1.98575 | 2.98499  | -4.23039 | -1.99430 | -3.02179 | 4.21245 | -2.01786 |
| C  | -5.50026 | 5.47395 | -0.07804 | 5.51204  | -5.47846 | -0.07989 | -5.53022 | 5.49384 | -0.10175 |
| H  | -6.04394 | 4.73531 | 1.87659  | 6.04467  | -4.75875 | 1.88446  | -6.05210 | 4.79806 | 1.87428  |
| H  | -4.72831 | 5.98420 | -2.02885 | 4.74990  | -5.97019 | -2.03945 | -4.78198 | 5.95787 | -2.07299 |
| H  | -6.27183 | 6.23758 | -0.09379 | 6.28152  | -6.24415 | -0.09766 | -6.30062 | 6.25849 | -0.12487 |
| Pd | 0.00000  | 0.00000 | -0.00015 | 0.00000  | -0.00001 | 0.00000  | 0.00000  | 0.01815 | -0.00013 |

### H-PdTPP, total charge 0

|   | Doublet  |          |          | Quartet  |          |          | Sextet   |          |          |
|---|----------|----------|----------|----------|----------|----------|----------|----------|----------|
| N | 0.16608  | -2.04304 | -0.04047 | -1.37561 | -1.40517 | 0.01257  | 2.06990  | 0.00005  | -0.09395 |
| N | -2.04185 | -0.16791 | -0.03779 | -1.51735 | 1.46588  | -0.26569 | 0.00142  | -2.06819 | -0.03671 |
| N | -0.16748 | 2.04231  | -0.02686 | 1.37290  | 1.59852  | -0.25988 | -2.06506 | -0.00005 | 0.02082  |
| N | 2.04000  | 0.16747  | -0.02212 | 1.49092  | -1.26362 | 0.03499  | 0.00132  | 2.06819  | -0.03671 |
| C | 1.33703  | -2.76340 | -0.00169 | -1.13960 | -2.68080 | 0.45024  | 2.88671  | 1.10877  | -0.03435 |
| C | 1.02363  | -4.17238 | 0.07766  | -2.39368 | -3.38684 | 0.51720  | 4.26148  | 0.68450  | 0.05483  |
| C | -0.33377 | -4.28335 | 0.08088  | -3.36449 | -2.53172 | 0.06263  | 4.26151  | -0.68430 | 0.05480  |
| C | -0.87208 | -2.94405 | 0.00398  | -2.72323 | -1.28340 | -0.24666 | 2.88676  | -1.10864 | -0.03439 |
| C | -2.24002 | -2.63824 | -0.00872 | -3.37807 | -0.11048 | -0.68558 | 2.46410  | -2.46217 | -0.01778 |
| C | -2.76346 | -1.33846 | -0.04348 | -2.79758 | 1.16807  | -0.72768 | 1.11102  | -2.88562 | -0.02800 |
| C | -4.17417 | -1.02448 | -0.08855 | -3.43146 | 2.39349  | -1.10457 | 0.68748  | -4.26318 | -0.04568 |
| C | -4.28476 | 0.33293  | -0.08752 | -2.54880 | 3.41467  | -0.81193 | -0.68134 | -4.26437 | -0.04017 |
| C | -2.94331 | 0.87043  | -0.05526 | -1.37453 | 2.80767  | -0.26873 | -1.10688 | -2.88684 | -0.04162 |
| C | -2.63761 | 2.23733  | -0.02599 | -0.16130 | 3.47215  | 0.21698  | -2.46004 | -2.46329 | -0.03268 |
| C | -1.33890 | 2.76223  | -0.00677 | 1.11433  | 2.92291  | -0.24589 | -2.88124 | -1.10883 | -0.03573 |
| C | -1.02784 | 4.17362  | 0.01507  | 2.24012  | 3.63769  | -0.76179 | -4.25454 | -0.68468 | -0.14248 |
| C | 0.32944  | 4.28614  | 0.01944  | 3.20872  | 2.70098  | -1.06211 | -4.25457 | 0.68447  | -0.14250 |
| C | 0.86955  | 2.94523  | -0.01379 | 2.67735  | 1.41917  | -0.71448 | -2.88129 | 1.10869  | -0.03577 |
| C | 2.23718  | 2.63912  | -0.03446 | 3.36085  | 0.19209  | -0.70888 | -2.46016 | 2.46317  | -0.03275 |
| C | 2.75993  | 1.33857  | -0.05978 | 2.81285  | -1.04013 | -0.28948 | -1.10702 | 2.88678  | -0.04166 |
| C | 4.16843  | 1.02528  | -0.14794 | 3.54751  | -2.25627 | -0.07659 | -0.68154 | 4.26433  | -0.04020 |
| C | 4.27980  | -0.33206 | -0.14736 | 2.65714  | -3.19549 | 0.37837  | 0.68728  | 4.26321  | -0.04565 |
| C | 2.94120  | -0.87070 | -0.05779 | 1.36317  | -2.56546 | 0.42734  | 1.11089  | 2.88567  | -0.02796 |
| C | 2.63687  | -2.23882 | -0.02466 | 0.14027  | -3.22852 | 0.71608  | 2.46398  | 2.46229  | -0.01771 |
| H | 1.75472  | -4.96494 | 0.13535  | -2.51985 | -4.40269 | 0.85976  | 5.11017  | 1.34672  | 0.13208  |
| H | -0.92649 | -5.18393 | 0.14169  | -4.42326 | -2.72502 | -0.02764 | 5.11024  | -1.34649 | 0.13204  |
| H | -4.96811 | -1.75579 | -0.11840 | -4.41987 | 2.48097  | -1.53089 | 1.35025  | -5.11468 | -0.06744 |
| H | -5.18636 | 0.92704  | -0.10858 | -2.68410 | 4.47415  | -0.97576 | -1.34237 | -5.11732 | -0.03069 |
| H | -1.76135 | 4.96621  | 0.02508  | 2.28523  | 4.70741  | -0.90780 | -5.10151 | -1.34755 | -0.23294 |
| H | 0.92105  | 5.18920  | 0.04152  | 4.19011  | 2.87959  | -1.47606 | -5.10158 | 1.34729  | -0.23298 |
| H | 4.95971  | 1.75690  | -0.21666 | 4.60802  | -2.37808 | -0.24043 | -1.34261 | 5.11725  | -0.03074 |
| H | 5.17983  | -0.92478 | -0.21569 | 2.85422  | -4.22696 | 0.63030  | 1.35001  | 5.11474  | -0.06740 |
| C | -3.77966 | 3.20658  | -0.01470 | -0.22059 | 4.58294  | 1.12859  | -3.51838 | -3.51186 | -0.04039 |
| C | -4.14612 | 3.85879  | 1.17200  | 0.96184  | 5.18838  | 1.65522  | -3.69069 | -4.35393 | -1.15199 |
| C | -4.49883 | 3.47662  | -1.18844 | -1.46290 | 5.09289  | 1.61674  | -4.36950 | -3.67272 | 1.06615  |
| C | -5.21130 | 4.76347  | 1.18525  | 0.89967  | 6.25300  | 2.54431  | -4.68854 | -5.33146 | -1.15746 |
| H | -3.59305 | 3.65003  | 2.08335  | 1.93185  | 4.79587  | 1.37857  | -3.04144 | -4.23147 | -2.01411 |
| C | -5.56387 | 4.38158  | -1.17667 | -1.51262 | 6.15783  | 2.50634  | -5.36403 | -4.65351 | 1.06333  |
| H | -4.21664 | 2.97531  | -2.10997 | -2.38997 | 4.62706  | 1.30859  | -4.24058 | -3.02707 | 1.92999  |
| C | -5.92290 | 5.02731  | 0.01065  | -0.33547 | 6.76181  | 2.97014  | -5.52751 | -5.48547 | -0.04905 |
| H | -5.48548 | 5.25932  | 2.11219  | 1.82310  | 6.68452  | 2.92086  | -4.81247 | -5.96935 | -2.02813 |
| H | -6.11033 | 4.58273  | -2.09386 | -2.47856 | 6.51527  | 2.85262  | -6.00844 | -4.76916 | 1.93030  |
| H | -6.75074 | 5.73058  | 0.02047  | -0.37932 | 7.59616  | 3.66371  | -6.30216 | -6.24693 | -0.05230 |
| C | -3.20920 | -3.77875 | 0.02013  | -4.81021 | -0.24099 | -1.08003 | 3.51835  | -3.51429 | 0.02374  |
| C | -3.96188 | -4.04417 | 1.17445  | -5.81693 | 0.43727  | -0.37310 | 3.66700  | -4.33479 | 1.15475  |
| C | -3.37988 | -4.60058 | -1.10442 | -5.17384 | -1.05921 | -2.16255 | 4.38526  | -3.70345 | -1.06576 |
| C | -4.86583 | -5.10935 | 1.20424  | -7.15724 | 0.29876  | -0.74002 | 4.65831  | -5.31802 | 1.19594  |
| H | -3.83023 | -3.41279 | 2.04845  | -5.54181 | 1.05965  | 0.47276  | 3.00446  | -4.19032 | 2.00318  |

|    |          |          |          |          |          |          |          |          |          |
|----|----------|----------|----------|----------|----------|----------|----------|----------|----------|
| C  | -4.28529 | -5.66469 | -1.07671 | -6.51319 | -1.18742 | -2.53653 | 5.37343  | -4.69004 | -1.02719 |
| H  | -2.80111 | -4.39779 | -2.00103 | -4.39902 | -1.58553 | -2.71186 | 4.27449  | -3.07521 | -1.94492 |
| C  | -5.03048 | -5.92226 | 0.07827  | -7.50891 | -0.51058 | -1.82501 | 5.51388  | -5.49981 | 0.10449  |
| H  | -5.43835 | -5.30480 | 2.10661  | -7.92584 | 0.82024  | -0.17670 | 4.76417  | -5.93875 | 2.08123  |
| H  | -4.40933 | -6.28971 | -1.95663 | -6.77813 | -1.81545 | -3.38233 | 6.03072  | -4.82752 | -1.88124 |
| H  | -5.73371 | -6.74988 | 0.10075  | -8.55121 | -0.61471 | -2.11257 | 6.28359  | -6.26564 | 0.13572  |
| C  | 3.77959  | -3.20521 | -0.01430 | 0.23083  | -4.62453 | 1.22966  | 3.51818  | 3.51446  | 0.02386  |
| C  | 4.59602  | -3.33035 | 1.12041  | 0.79159  | -4.86984 | 2.49464  | 3.66675  | 4.33494  | 1.15490  |
| C  | 4.05388  | -4.00073 | -1.13748 | -0.21163 | -5.71678 | 0.46449  | 4.38511  | 3.70369  | -1.06561 |
| C  | 5.66293  | -4.23260 | 1.13271  | 0.89594  | -6.17266 | 2.98696  | 4.65801  | 5.31822  | 1.19613  |
| H  | 4.38551  | -2.71914 | 1.99329  | 1.13819  | -4.03015 | 3.08995  | 3.00420  | 4.19041  | 2.00330  |
| C  | 5.12226  | -4.90134 | -1.12749 | -0.10268 | -7.02027 | 0.95455  | 5.37322  | 4.69033  | -1.02699 |
| H  | 3.42687  | -3.90533 | -2.01935 | -0.62934 | -5.53813 | -0.52191 | 4.27439  | 3.07546  | -1.94479 |
| C  | 5.92946  | -5.02023 | 0.00829  | 0.44903  | -7.25233 | 2.21851  | 5.51359  | 5.50008  | 0.10471  |
| H  | 6.28302  | -4.32140 | 2.02031  | 1.32483  | -6.34345 | 3.97036  | 4.76380  | 5.93894  | 2.08144  |
| H  | 5.32462  | -5.50704 | -2.00639 | -0.44331 | -8.85393 | 0.34680  | 6.03052  | 4.82787  | -1.88101 |
| H  | 6.75941  | -5.72101 | 0.01706  | 0.53219  | -7.26591 | 2.60020  | 6.28326  | 6.26595  | 0.13598  |
| C  | 3.20845  | 3.77814  | -0.03520 | 4.79148  | 0.19048  | -1.13245 | -3.51854 | 3.51169  | -0.04051 |
| C  | 3.36652  | 4.58358  | -1.17344 | 5.75687  | 0.90606  | -0.40570 | -4.36970 | 3.67255  | 1.06600  |
| C  | 3.97865  | 4.05634  | 1.10444  | 5.19382  | -0.53864 | -2.26337 | -3.69087 | 4.35372  | -1.15214 |
| C  | 4.27580  | 5.64470  | -1.17301 | 7.09643  | 0.89066  | -0.80064 | -5.36427 | 4.65329  | 1.06313  |
| H  | 2.77511  | 4.37013  | -2.05924 | 5.45151  | 1.46168  | 0.47563  | -4.24077 | 3.02692  | 1.92987  |
| C  | 4.88654  | 5.11860  | 1.10697  | 6.53161  | -0.54407 | -2.66431 | -4.68876 | 5.33121  | -1.15766 |
| H  | 3.85773  | 3.43700  | 1.98856  | 4.45036  | -1.09313 | -2.82811 | -3.04158 | 4.23128  | -2.01424 |
| C  | 5.03798  | 5.91549  | -0.03219 | 7.48700  | 0.16869  | -1.93288 | -5.52776 | 5.48521  | -0.04927 |
| H  | 4.38987  | 6.25684  | -2.06326 | 7.83402  | 1.44024  | -0.22275 | -6.00871 | 4.76893  | 1.93008  |
| H  | 5.47269  | 5.32410  | 1.99830  | 6.82664  | -1.10470 | -3.54670 | -4.81269 | 5.96907  | -2.02835 |
| H  | 5.74428  | 6.74080  | -0.03101 | 8.52830  | 0.16015  | -2.24194 | -6.30244 | 6.24664  | -0.05257 |
| Pd | -0.00105 | -0.00051 | 0.05218  | -0.00869 | 0.10871  | 0.00725  | 0.00333  | 0.00000  | 0.04750  |
| H  | -0.01194 | -0.01157 | 1.91494  | -0.02817 | 0.25761  | 1.83780  | 0.06790  | 0.00000  | 1.88574  |

### O=Ti(IV)TPP, total charge 0

|   | Singlet  |          |          | Triplet  |          |          | Quintet  |          |          |
|---|----------|----------|----------|----------|----------|----------|----------|----------|----------|
| N | -2.04631 | -0.05671 | -0.03992 | -1.21638 | -1.52428 | 0.02781  | -1.59819 | 1.37246  | -0.22424 |
| N | -0.05611 | 2.04160  | -0.02594 | -1.64940 | 1.31115  | -0.20912 | 1.27699  | 1.66888  | -0.23808 |
| N | 2.04343  | 0.05537  | -0.01582 | 1.19992  | 1.71558  | -0.25183 | 1.56251  | -1.16138 | 0.06877  |
| N | 0.05331  | -2.04303 | -0.04891 | 1.60552  | -1.11821 | 0.05446  | -1.27567 | -1.46203 | 0.03050  |
| C | -2.83890 | -1.18574 | -0.08437 | -0.87217 | -2.79238 | 0.45356  | -2.82177 | 1.00517  | -0.75455 |
| C | -4.22616 | -0.79739 | -0.18222 | -2.05936 | -3.60070 | 0.55205  | -3.47771 | 2.17651  | -1.26979 |
| C | -4.26316 | 0.56610  | -0.17895 | -3.10616 | -2.83157 | 0.11259  | -2.65540 | 3.25382  | -0.99577 |
| C | -2.89825 | 1.02798  | -0.09306 | -2.57731 | -1.53663 | -0.21231 | -1.51058 | 2.73840  | -0.32379 |
| C | -2.51461 | 2.37862  | -0.06856 | -3.33161 | -0.43939 | -0.69268 | -0.36146 | 3.47921  | -0.20603 |
| C | -1.18680 | 2.83439  | -0.04104 | -2.85974 | 0.88254  | -0.76300 | 0.94768  | 3.00208  | -0.24395 |
| C | -0.80136 | 4.22500  | -0.06812 | -3.54440 | 2.01657  | -1.29599 | 2.02748  | 3.77009  | -0.76735 |
| C | 0.56196  | 4.26438  | -0.06351 | -2.76446 | 3.12685  | -1.02576 | 3.05265  | 2.88475  | -1.04235 |
| C | 1.02751  | 2.89768  | -0.04792 | -1.61351 | 2.65883  | -0.32809 | 2.57855  | 1.57197  | -0.69731 |
| C | 2.37865  | 2.51449  | -0.07660 | -0.49155 | 3.45603  | 0.19504  | 3.34373  | 0.37464  | -0.72820 |
| C | 2.83287  | 1.18465  | -0.09515 | 0.84251  | 3.02586  | -0.21131 | 2.85427  | -0.88708 | -0.31224 |
| C | 4.21549  | 0.79677  | -0.24259 | 1.92067  | 3.84569  | -0.66186 | 3.64311  | -2.10671 | -0.24620 |
| C | 4.25271  | -0.56672 | -0.24195 | 2.97016  | 2.99811  | -0.95681 | 2.81918  | -3.09655 | 0.20446  |
| C | 2.89336  | -1.02938 | -0.09333 | 2.52621  | 1.66755  | -0.68598 | 1.50793  | -2.51545 | 0.37681  |
| C | 2.51184  | -2.38186 | -0.06701 | 3.31486  | 0.50470  | -0.72881 | 0.33364  | -3.24604 | 0.66053  |
| C | 1.18309  | -2.83789 | -0.03787 | 2.88927  | -0.78727 | -0.35278 | -0.97207 | -2.75318 | 0.45895  |
| C | 0.79438  | -4.22751 | 0.00021  | 3.70582  | -1.96570 | -0.33871 | -2.18898 | -3.52519 | 0.53662  |
| C | -0.56907 | -4.26422 | 0.00139  | 2.91933  | -3.00022 | 0.10600  | -3.20293 | -2.72608 | 0.09166  |
| C | -1.03196 | -2.89764 | -0.03544 | 1.60631  | -2.46193 | 0.32637  | -2.62482 | -1.43172 | -0.22476 |
| C | -2.38381 | -2.51479 | -0.05699 | 0.45400  | -3.23993 | 0.64392  | -3.35454 | -0.31376 | -0.70806 |
| H | -5.05810 | -1.48252 | -0.25192 | -2.09396 | -4.62356 | 0.89560  | -4.43085 | 2.18563  | -1.77713 |
| H | -5.13119 | 1.20604  | -0.23760 | -4.14537 | -3.11660 | 0.03788  | -2.81517 | 4.29298  | -1.24676 |
| H | -1.48904 | 5.05749  | -0.09446 | -4.49178 | 1.98980  | -1.81427 | 2.01541  | 4.84006  | -0.91856 |
| H | 1.19882  | 5.13635  | -0.07713 | -2.95699 | 4.15470  | -1.29875 | 4.03625  | 3.11010  | -1.42709 |
| H | 5.04260  | 1.48218  | -0.35433 | 1.88574  | 4.92012  | -0.77122 | 4.68329  | -2.18644 | -0.52401 |
| H | 5.11609  | -1.20582 | -0.35347 | 3.95383  | 3.26887  | -1.31182 | 3.05783  | -4.13879 | 0.35821  |
| H | 1.47832  | -5.06268 | 0.02949  | 4.74182  | -2.01132 | -0.64014 | -2.25612 | -4.54845 | 0.87479  |
| H | -1.20738 | -5.13477 | 0.03143  | 3.19570  | -4.03726 | 0.22663  | -4.25112 | -2.97147 | 0.00773  |
| C | 3.41228  | 3.59659  | -0.11049 | -0.70392 | 4.58329  | 1.06175  | 4.75648  | 0.46811  | -1.19788 |
| C | 4.21888  | 3.84042  | 1.01183  | 0.38648  | 5.26406  | 1.68420  | 5.82534  | 0.29812  | -0.30236 |
| C | 3.59653  | 4.37884  | -1.26100 | -2.01440 | 5.03398  | 1.40530  | 5.04346  | 0.74056  | -2.54566 |

|    |          |          |          |          |          |          |          |          |          |
|----|----------|----------|----------|----------|----------|----------|----------|----------|----------|
| C  | 5.18728  | 4.84743  | 0.98557  | 0.17881  | 6.34509  | 2.53018  | 7.14754  | 0.39261  | -0.74395 |
| H  | 4.07816  | 3.23878  | 1.90520  | 1.39753  | 4.91179  | 1.52321  | 5.61217  | 0.09861  | 0.74404  |
| C  | 4.56652  | 5.38429  | -1.28927 | -2.20997 | 6.11617  | 2.25328  | 6.36530  | 0.83615  | -2.98826 |
| H  | 2.97808  | 4.19071  | -2.13402 | -2.87881 | 4.51408  | 1.01242  | 4.22253  | 0.87231  | -3.24487 |
| C  | 5.36409  | 5.62184  | -0.16536 | -1.11875 | 6.79417  | 2.81432  | 7.42172  | 0.66163  | -2.08867 |
| H  | 5.80082  | 5.02747  | 1.86383  | 1.03459  | 6.83394  | 2.98755  | 7.96199  | 0.26203  | -0.03685 |
| H  | 4.70028  | 5.97876  | -2.18871 | -3.22311 | 6.43052  | 2.48848  | 6.56907  | 1.04295  | -4.03520 |
| H  | 6.11752  | 6.40406  | -0.18644 | -1.27661 | 7.64070  | 3.47582  | 8.44952  | 0.73568  | -2.43227 |
| C  | -3.59980 | 3.41111  | -0.08665 | -4.73140 | -0.70551 | -1.12662 | -0.51405 | 4.60309  | 1.08355  |
| C  | -3.94341 | 4.09698  | 1.08792  | -5.81040 | -0.04679 | -0.51228 | 0.61437  | 5.27513  | 1.64488  |
| C  | -4.28562 | 3.70921  | -1.27351 | -4.99625 | -1.62641 | -2.15490 | -1.80177 | 5.06434  | 1.49454  |
| C  | -4.95448 | 5.06175  | 1.07629  | -7.12216 | -0.30635 | -0.91408 | 0.46020  | 6.35427  | 2.50441  |
| H  | -3.41588 | 3.86685  | 2.00923  | -5.61248 | 0.65551  | 0.29148  | 1.61275  | 4.92083  | 1.41946  |
| C  | -5.29633 | 4.67445  | -1.28641 | -6.30738 | -1.87546 | -2.56507 | -1.94302 | 6.14573  | 2.35347  |
| H  | -4.02014 | 3.18264  | -2.18591 | -4.16650 | -2.13545 | -2.63594 | -2.68887 | 4.54945  | 1.14644  |
| C  | -5.63346 | 5.35303  | -0.11105 | -7.37441 | -1.21824 | -1.94404 | -0.81718 | 6.81201  | 2.85884  |
| H  | -5.21199 | 5.58302  | 1.99399  | -7.94623 | 0.20104  | -0.42072 | 1.34267  | 6.83791  | 2.91412  |
| H  | -5.81736 | 4.89686  | -2.21343 | -6.49503 | -2.58145 | -3.36901 | -2.93935 | 6.46811  | 2.64326  |
| H  | -6.41918 | 6.10306  | -0.12040 | -8.39481 | -1.41647 | -2.25930 | -0.93273 | 7.65764  | 3.53011  |
| C  | -3.41529 | -3.59944 | -0.05825 | 0.69009  | -4.64079 | 1.09145  | -4.75712 | -0.52977 | -1.14921 |
| C  | -3.61122 | -4.40209 | -1.19260 | 1.36483  | -4.88043 | 2.30099  | -5.05311 | -1.44896 | -2.17270 |
| C  | -4.20453 | -3.82854 | 1.07946  | 0.27890  | -5.73960 | 0.31821  | -5.82154 | 0.17017  | -0.55153 |
| C  | -4.57661 | -5.41239 | -1.19056 | 1.60771  | -6.18565 | 2.73362  | -6.36961 | -1.66053 | -2.58701 |
| H  | -3.00518 | -4.22634 | -2.07686 | 1.68833  | -4.03513 | 2.90131  | -4.23951 | -1.99007 | -2.64728 |
| C  | -5.16827 | -4.84031 | 1.08348  | 0.52849  | -7.04514 | 0.74754  | -7.13839 | -0.04270 | -0.96354 |
| H  | -4.05358 | -3.21202 | 1.96092  | -0.22327 | -5.56357 | -0.62842 | -5.60825 | 0.87188  | 0.24931  |
| C  | -5.35740 | -5.63464 | -0.05185 | 1.19045  | -7.27241 | 1.95825  | -7.41793 | -0.95800 | -1.98387 |
| H  | -4.71965 | -6.02284 | -2.07780 | 2.12155  | -6.35318 | 3.67596  | -6.57579 | -2.36953 | -3.38402 |
| H  | -5.76826 | -5.00879 | 1.97331  | 0.21104  | -7.88348 | 0.13375  | -7.94682 | 0.50102  | -0.84272 |
| H  | -6.10719 | -6.42063 | -0.04928 | 1.38234  | -8.28776 | 2.29316  | -8.44243 | -1.12266 | -2.30498 |
| C  | 3.60190  | -3.40684 | -0.08554 | 4.72885  | 0.65840  | -1.18631 | 0.50564  | -4.66002 | 1.10481  |
| C  | 4.43430  | -3.57674 | 1.03182  | 5.01021  | 0.97470  | -2.52441 | 1.09879  | -4.93097 | 2.34875  |
| C  | 3.81329  | -4.21039 | -1.21671 | 5.79270  | 0.49791  | -0.28490 | 0.10905  | -5.73510 | 0.29310  |
| C  | 5.45440  | -4.53148 | 1.01948  | 6.33138  | 1.12026  | -2.95462 | 1.28105  | -6.24846 | 2.77605  |
| H  | 4.27234  | -2.95938 | 1.91071  | 4.18899  | 1.09893  | -3.22410 | 1.40674  | -4.10204 | 2.97941  |
| C  | 4.83531  | -5.16313 | -1.23133 | 7.11299  | 0.65224  | -0.71407 | 0.29665  | -7.05255 | 0.71819  |
| H  | 3.17490  | -4.07967 | -2.08582 | 5.57778  | 0.26072  | 0.75280  | -0.33423 | -5.53220 | -0.67744 |
| C  | 5.65823  | -5.32690 | -0.11253 | 7.38606  | 0.96116  | -2.05040 | 0.88090  | -7.31277 | 1.96199  |
| H  | 6.08702  | -4.65480 | 1.89399  | 6.53539  | 1.35760  | -3.99484 | 1.73376  | -6.44226 | 3.74427  |
| H  | 4.98966  | -5.77420 | -2.11624 | 7.92664  | 0.53287  | -0.00435 | -0.00843 | -7.87411 | 0.07623  |
| H  | 6.45205  | -6.06832 | -0.12289 | 8.41305  | 1.07785  | -2.38431 | 1.02499  | -8.33719 | 2.29315  |
| O  | -0.01726 | -0.01615 | 2.15168  | -0.02941 | 0.28212  | 2.11615  | -0.03844 | 0.29875  | 2.11927  |
| Ti | -0.00413 | -0.00330 | 0.53533  | -0.02083 | 0.15162  | 0.50753  | -0.01707 | 0.16684  | 0.50972  |

### O=Ti(IV)TPP, total charge 1

|   | Doublet  |          |          | Quartet  |          |          | Sextet   |          |          |
|---|----------|----------|----------|----------|----------|----------|----------|----------|----------|
| N | 0.33574  | 2.02596  | -0.08428 | -0.00001 | 2.05234  | -0.03776 | -1.29950 | 1.42827  | 0.00146  |
| N | 2.02614  | -0.33746 | -0.00553 | 2.05218  | 0.00001  | -0.02234 | 1.54212  | 1.14128  | 0.02808  |
| N | -0.33849 | -2.02392 | -0.01282 | 0.00001  | -2.05234 | -0.03777 | 1.27546  | -1.68705 | -0.29807 |
| N | -2.02714 | 0.33678  | -0.07567 | -2.05218 | -0.00001 | -0.02234 | -1.63287 | -1.40391 | -0.24014 |
| C | -0.61852 | 3.01874  | -0.01136 | -1.10271 | 2.87550  | 0.06111  | -2.65816 | 1.38080  | -0.17922 |
| C | 0.01853  | 4.29772  | 0.15169  | -0.68742 | 4.23160  | 0.26697  | -3.25133 | 2.61235  | 0.27159  |
| C | 1.36732  | 4.07408  | 0.15840  | 0.68737  | 4.23161  | 0.26697  | -2.23111 | 3.41306  | 0.72290  |
| C | 1.55920  | 2.65783  | -0.00204 | 1.10268  | 2.87551  | 0.06111  | -1.00803 | 2.69674  | 0.51342  |
| C | 2.82079  | 2.01849  | -0.06611 | 2.47083  | 2.44609  | -0.05987 | 0.30437  | 3.20397  | 0.67928  |
| C | 3.01109  | 0.61627  | -0.13765 | 2.86643  | 1.10868  | -0.16306 | 1.48073  | 2.48442  | 0.31820  |
| C | 4.27508  | -0.02024 | -0.39581 | 4.23106  | 0.67574  | -0.45838 | 2.77033  | 3.10154  | 0.05095  |
| C | 4.04984  | -1.36851 | -0.39641 | 4.23106  | -0.67569 | -0.45838 | 3.58748  | 2.13113  | -0.43153 |
| C | 2.64731  | -1.56007 | -0.13930 | 2.86644  | -1.10865 | -0.16306 | 2.83005  | 0.88336  | -0.42449 |
| C | 2.01246  | -2.82413 | -0.08138 | 2.47085  | -2.44606 | -0.05988 | 3.33860  | -0.36367 | -0.81145 |
| C | 0.61244  | -3.02200 | -0.00935 | 1.10271  | -2.87550 | 0.06110  | 2.59703  | -1.57923 | -0.37005 |
| C | -0.03069 | -4.30810 | 0.04364  | 0.68742  | -4.23161 | 0.26696  | 3.11562  | -2.89596 | -0.99016 |
| C | -1.37840 | -4.08140 | 0.03389  | -0.68737 | -4.23161 | 0.26696  | 2.11347  | -3.79020 | -0.69473 |
| C | -1.56446 | -2.65523 | 0.00685  | -1.10267 | -2.87551 | 0.06110  | 0.98689  | -3.01735 | -0.25206 |
| C | -2.82375 | -2.01563 | -0.06901 | -2.47082 | -2.44609 | -0.05988 | -0.33299 | -3.50285 | 0.16608  |
| C | -3.01906 | -0.61689 | -0.15298 | -2.86642 | -1.10868 | -0.16306 | -1.48248 | -2.79830 | -0.41491 |
| C | -4.30076 | 0.02262  | -0.29089 | -4.23106 | -0.67574 | -0.45838 | -2.57219 | -3.31041 | -1.15324 |
| C | -4.07443 | 1.37002  | -0.30689 | -4.23107 | 0.67569  | -0.45838 | -3.42598 | -2.25398 | -1.39275 |
| C | -2.65676 | 1.56021  | -0.14639 | -2.86644 | 1.10865  | -0.16305 | -2.82062 | -1.06489 | -0.77621 |
| C | -2.01998 | 2.82233  | -0.07267 | -2.47085 | 2.44606  | -0.05987 | -3.38786 | 0.26801  | -0.71557 |

|    |          |          |          |          |          |          |          |          |          |
|----|----------|----------|----------|----------|----------|----------|----------|----------|----------|
| H  | -0.49179 | 5.24121  | 0.26956  | -1.34687 | 5.07377  | 0.40926  | -4.30941 | 2.82733  | 0.28279  |
| H  | 2.15332  | 4.80277  | 0.28374  | 1.34682  | 5.07379  | 0.40925  | -2.31689 | 4.39683  | 1.15820  |
| H  | 5.20538  | 0.49228  | -0.58706 | 5.05476  | 1.33970  | -0.67262 | 2.98840  | 4.15242  | 0.16963  |
| H  | 4.76304  | -2.15573 | -0.58723 | 5.05478  | -1.33965 | -0.67262 | 4.60506  | 2.23085  | -0.77788 |
| H  | 0.47496  | -5.26065 | 0.07750  | 1.34687  | -5.07378 | 0.40924  | 4.11601  | -3.11069 | -1.33473 |
| H  | -2.16986 | -4.81513 | 0.03278  | -1.34682 | -5.07379 | 0.40925  | 2.13440  | -4.86764 | -0.77822 |
| H  | -5.24924 | -0.48628 | -0.36712 | -5.05476 | -1.33970 | -0.67261 | -2.69237 | -4.34091 | -1.45604 |
| H  | -4.80227 | 2.15821  | -0.42330 | -5.05478 | 1.33965  | -0.67261 | -4.35688 | -2.26915 | -1.93904 |
| C  | 2.88618  | -4.02656 | -0.12250 | 3.52092  | -3.49620 | -0.08676 | 4.75262  | -0.45198 | -1.27833 |
| C  | 2.79048  | -4.95099 | -1.17827 | 3.52146  | -4.48712 | -1.08587 | 5.04076  | -0.78403 | -2.61202 |
| C  | 3.82901  | -4.24574 | 0.89828  | 4.53223  | -3.51184 | 0.89111  | 5.81354  | -0.21914 | -0.38767 |
| C  | 3.62601  | -6.06787 | -1.21392 | 4.51893  | -5.46217 | -1.11225 | 6.36492  | -0.87245 | -3.04830 |
| H  | 2.07703  | -4.77811 | -1.97840 | 2.75072  | -4.47619 | -1.85089 | 4.22504  | -0.96111 | -3.30751 |
| C  | 4.64710  | -5.37573 | 0.87025  | 5.51950  | -4.49859 | 0.87122  | 7.13762  | -0.31116 | -0.82478 |
| H  | 3.90130  | -3.53926 | 1.71970  | 4.52665  | -2.76164 | 1.67642  | 5.59694  | 0.02262  | 0.64912  |
| C  | 4.55105  | -6.28615 | -0.18736 | 5.51761  | -5.47285 | -0.13193 | 7.41587  | -0.63669 | -2.15558 |
| H  | 3.55595  | -6.76573 | -2.04267 | 4.51853  | -6.21143 | -1.89804 | 6.57511  | -1.12100 | -4.08427 |
| H  | 5.35839  | -5.54465 | 1.67287  | 6.28607  | -4.50826 | 1.64002  | 7.94904  | -0.13356 | -0.12534 |
| H  | 5.19434  | -7.16038 | -0.21231 | 6.28866  | -6.23697 | -0.14969 | 8.44465  | -0.70751 | -2.49529 |
| C  | 4.03450  | 2.87422  | -0.07282 | 3.52088  | 3.49624  | -0.08676 | 0.48932  | 4.59285  | 1.15931  |
| C  | 5.00673  | 2.72940  | 0.93449  | 4.53219  | 3.51189  | 0.89110  | 1.29756  | 4.83540  | 2.87663  |
| C  | 4.23131  | 3.83491  | -1.08212 | 3.52140  | 4.48717  | -1.08586 | -0.10397 | 5.68615  | 0.49785  |
| C  | 6.14273  | 3.53900  | 0.93854  | 5.51945  | 4.49865  | 0.87121  | 1.48553  | 6.13501  | 2.75574  |
| H  | 4.85440  | 1.99834  | 1.72265  | 4.52664  | 2.76168  | 1.67640  | 1.75352  | 3.99726  | 2.80623  |
| C  | 5.38023  | 4.62608  | -1.08731 | 4.51885  | 5.46223  | -1.11225 | 0.10397  | 6.98667  | 0.95675  |
| H  | 3.49340  | 3.94010  | -1.87165 | 2.75065  | 4.47623  | -1.85087 | -0.69777 | 5.51273  | -0.39406 |
| C  | 6.33486  | 4.48464  | -0.07436 | 5.51754  | 5.47292  | -0.13194 | 0.89188  | 7.21437  | 2.09028  |
| H  | 6.87640  | 3.43221  | 1.73161  | 6.28603  | 4.50833  | 1.64000  | 2.09306  | 6.30660  | 3.63900  |
| H  | 5.53087  | 5.35088  | -1.88147 | 4.51844  | 6.21149  | -1.89804 | -0.34325 | 7.82228  | 0.42708  |
| H  | 7.22405  | 5.10760  | -0.07483 | 6.28858  | 6.23705  | -0.14971 | 1.04695  | 8.22681  | 2.45039  |
| C  | -2.88684 | 4.03000  | -0.06011 | -3.52092 | 3.49620  | -0.08675 | -4.75130 | 0.48876  | -1.20609 |
| C  | -3.81083 | 4.22780  | 0.98215  | -4.53223 | 3.51184  | 0.89111  | -5.81877 | -0.36960 | -0.84657 |
| C  | -2.79282 | 4.98879  | -1.08507 | -3.52145 | 4.48713  | -1.08586 | -5.03873 | 1.59309  | -2.04753 |
| C  | -4.61506 | 5.36777  | 1.00268  | -5.51950 | 4.49859  | 0.87121  | -7.11162 | -0.12645 | -1.29696 |
| H  | -3.87785 | 3.49763  | 1.78300  | -4.52666 | 2.76163  | 1.67641  | -5.63419 | -1.20007 | -0.17212 |
| C  | -3.61492 | 6.11607  | -1.07234 | -4.51892 | 5.46217  | -1.11225 | -6.32991 | 1.82012  | -2.51391 |
| H  | -2.09008 | 4.83525  | -1.89854 | -2.75070 | 4.47620  | -1.85087 | -4.23005 | 2.25043  | -2.35041 |
| C  | -4.52323 | 6.31092  | -0.02636 | -5.51761 | 5.47285  | -0.13194 | -7.37357 | 0.96481  | -2.13932 |
| H  | -5.31154 | 5.51959  | 1.82154  | -6.28608 | 4.50826  | 1.64000  | -7.92151 | -0.78024 | -0.98804 |
| H  | -3.54681 | 6.84076  | -1.87790 | -4.51851 | 6.21144  | -1.89804 | -6.52437 | 2.65945  | -3.17445 |
| H  | -5.15594 | 7.19310  | -0.01325 | -6.28865 | 6.23697  | -0.14971 | -8.38171 | 1.14351  | -2.50017 |
| C  | -4.03366 | -2.88564 | -0.07374 | -3.52088 | -3.49624 | -0.08676 | -0.49960 | -4.50165 | 1.16730  |
| C  | -4.37809 | -3.61657 | 1.07599  | -3.52141 | -4.48716 | -1.08587 | 0.62481  | -5.06607 | 1.85801  |
| C  | -4.83769 | -2.98732 | -1.22146 | -4.53219 | -3.51189 | 0.89111  | -1.80274 | -4.94641 | 1.57361  |
| C  | -5.51511 | -4.42656 | 1.07891  | -4.51886 | -5.46222 | -1.11226 | 0.45279  | -6.01843 | 2.84574  |
| H  | -3.76287 | -3.53474 | 1.96724  | -2.75066 | -4.47622 | -1.85089 | 1.62547  | -4.72779 | 1.61784  |
| C  | -5.96400 | -3.81212 | -1.21959 | -5.51945 | -4.49865 | 0.87122  | -1.95781 | -5.90103 | 2.56295  |
| H  | -4.56852 | -2.43314 | -2.11590 | -4.52662 | -2.76169 | 1.67641  | -2.68231 | -4.52655 | 1.10083  |
| C  | -6.30760 | -4.52920 | -0.06890 | -5.51755 | -5.47291 | -0.13194 | -0.83620 | -6.45389 | 3.20555  |
| H  | -5.78089 | -4.97612 | 1.97674  | -4.51845 | -6.21148 | -1.89805 | 1.32186  | -6.42835 | 3.35107  |
| H  | -6.57118 | -3.89494 | -2.11588 | -6.28602 | -4.50833 | 1.64001  | -2.95552 | -6.22279 | 2.84529  |
| H  | -7.18770 | -5.16489 | -0.06703 | -6.28859 | -6.23704 | -0.14970 | -0.96328 | -7.20692 | 3.97664  |
| O  | -0.03944 | 0.05431  | 2.11058  | 0.00000  | -0.00001 | 2.12586  | -0.04553 | -0.34271 | 2.06793  |
| Ti | -0.00727 | 0.01019  | 0.50506  | 0.00000  | -0.00001 | 0.51829  | -0.02286 | -0.18610 | 0.46647  |

### O=V(IV)TPP, total charge 0

|   | Doublet  |          |          | Quartet  |          |          | Sextet   |          |          |
|---|----------|----------|----------|----------|----------|----------|----------|----------|----------|
| N | -0.00014 | 2.02287  | -0.04487 | -1.24607 | -1.46802 | 0.01905  | 1.29755  | 1.40868  | 0.02848  |
| N | 2.02314  | 0.00014  | -0.04142 | -1.58264 | 1.34426  | -0.24291 | 1.53656  | -1.39716 | -0.25052 |
| N | 0.00013  | -2.02287 | -0.04487 | 1.22989  | 1.66287  | -0.27078 | -1.29533 | -1.61993 | -0.26043 |
| N | -2.02315 | -0.00013 | -0.04142 | 1.55078  | -1.14773 | 0.03793  | -1.51193 | 1.18226  | 0.05366  |
| C | -1.10443 | 2.85432  | -0.02120 | -0.94785 | -2.74453 | 0.45551  | 1.03585  | 2.70427  | 0.47160  |
| C | -0.68170 | 4.23155  | 0.04520  | -2.15621 | -3.51903 | 0.54613  | 2.27129  | 3.44457  | 0.54907  |
| C | 0.68113  | 4.23164  | 0.04523  | -3.17498 | -2.72458 | 0.08696  | 3.25949  | 2.62600  | 0.08376  |
| C | 1.10404  | 2.85447  | -0.02120 | -2.60458 | -1.44895 | -0.23694 | 2.64390  | 1.35222  | -0.23999 |
| C | 2.44270  | 2.44409  | -0.06940 | -3.32674 | -0.33841 | -0.72837 | 3.34330  | 0.22696  | -0.74218 |
| C | 2.84984  | 1.10390  | -0.11920 | -2.81379 | 0.96469  | -0.78806 | 2.77503  | -1.07312 | -0.77654 |
| C | 4.21984  | 0.68174  | -0.27774 | -3.48188 | 2.12783  | -1.27642 | 3.41163  | -2.26834 | -1.25930 |

|   |          |          |          |          |          |          |          |          |          |
|---|----------|----------|----------|----------|----------|----------|----------|----------|----------|
| C | 4.21993  | -0.68118 | -0.27780 | -2.67918 | 3.21206  | -0.97414 | 2.56964  | -3.32196 | -0.95752 |
| C | 2.84999  | -1.10352 | -0.11919 | -1.52866 | 2.69556  | -0.31181 | 1.43217  | -2.76509 | -0.30883 |
| C | 2.44303  | -2.44376 | -0.06939 | -0.39154 | 3.45213  | 0.22334  | 0.27461  | -3.47012 | 0.23879  |
| C | 1.10442  | -2.85432 | -0.02120 | 0.91881  | 2.98434  | -0.20703 | -1.01202 | -2.96397 | -0.22945 |
| C | 0.68169  | -4.23154 | 0.04524  | 2.01372  | 3.77861  | -0.65855 | -2.11137 | -3.71432 | -0.73502 |
| C | -0.68114 | -4.23163 | 0.04518  | 3.03256  | 2.90401  | -0.98000 | -3.10749 | -2.80652 | -1.03838 |
| C | -1.10405 | -2.85446 | -0.02119 | 2.55082  | 1.58613  | -0.71775 | -2.59489 | -1.50175 | -0.72077 |
| C | -2.44271 | -2.44408 | -0.06938 | 3.31147  | 0.40846  | -0.76066 | -3.33312 | -0.29203 | -0.76350 |
| C | -2.84985 | -1.10389 | -0.11918 | 2.84764  | -0.86082 | -0.36343 | -2.81210 | 0.94783  | -0.33006 |
| C | -4.21985 | -0.68174 | -0.27776 | 3.63684  | -2.05575 | -0.31895 | -3.57427 | 2.18179  | -0.24576 |
| C | -4.21994 | 0.68118  | -0.27776 | 2.82412  | -3.06028 | 0.14466  | -2.72997 | 3.14397  | 0.22473  |
| C | -2.85000 | 1.10352  | -0.11918 | 1.52346  | -2.48603 | 0.33995  | -1.43360 | 2.52984  | 0.38595  |
| C | -2.44303 | 2.44377  | -0.06939 | 0.35801  | -3.23139 | 0.66699  | -0.25026 | 3.23149  | 0.68837  |
| H | -1.34509 | 5.08229  | 0.09244  | -2.22216 | -4.53762 | 0.89749  | 2.36618  | 4.46114  | 0.90041  |
| H | 1.34441  | 5.08246  | 0.09249  | -4.22092 | -2.97951 | -0.00124 | 4.31297  | 2.84387  | -0.00955 |
| H | 5.06340  | 1.34619  | -0.39238 | -4.43647 | 2.13625  | -1.78176 | 4.36741  | -2.30773 | -1.76001 |
| H | 5.06357  | -1.34551 | -0.39249 | -2.85446 | 4.25328  | -1.20455 | 2.71166  | -4.37133 | -1.17418 |
| H | 1.34508  | -5.08228 | 0.09251  | 2.00930  | 4.85532  | -0.74907 | -2.13020 | -4.78814 | -0.85476 |
| H | -1.34442 | -5.08246 | 0.09241  | 4.02102  | 3.14764  | -1.34139 | -4.09733 | -3.01022 | -1.41920 |
| H | -5.06340 | -1.34619 | -0.39243 | 4.67322  | -2.13099 | -0.61290 | -4.61156 | 2.28866  | -0.52495 |
| H | -5.06358 | 1.34552  | -0.39242 | 3.07401  | -4.10042 | 0.29304  | -2.94442 | 4.18816  | 0.39948  |
| C | 3.50495  | -3.49762 | -0.08065 | -0.56327 | 4.56288  | 1.11768  | 0.39696  | -4.57395 | 1.14423  |
| C | 3.68843  | -4.31999 | -1.20308 | 0.55295  | 5.20680  | 1.73417  | -0.74955 | -5.20405 | 1.71796  |
| C | 4.33824  | -3.67716 | 1.03447  | -1.85753 | 5.03358  | 1.49557  | 1.67187  | -5.05613 | 1.57145  |
| C | 4.68395  | -5.30051 | -1.21137 | 0.38393  | 6.27315  | 2.60691  | -0.62449 | -6.26499 | 2.60441  |
| H | 3.04889  | -4.18240 | -2.07029 | 1.55317  | 4.83806  | 1.54484  | -1.73816 | -4.83133 | 1.47940  |
| C | 5.33177  | -4.65964 | 1.02870  | -2.01408 | 6.10068  | 2.37021  | 1.78374  | -6.11883 | 2.45756  |
| H | 4.19818  | -3.04483 | 1.90646  | -2.73984 | 4.54004  | 1.10845  | 2.57227  | -4.57195 | 1.21351  |
| C | 5.50789  | -5.47363 | -0.09473 | -0.89834 | 6.74320  | 2.92519  | 0.64026  | -6.74478 | 2.97511  |
| H | 4.81682  | -5.92610 | -2.08960 | 1.25831  | 6.73448  | 3.05773  | -1.51984 | -6.71703 | 3.02225  |
| H | 5.96545  | -4.78989 | 1.90145  | -3.01575 | 6.43099  | 2.63138  | 2.77095  | -6.45834 | 2.75887  |
| H | 6.28103  | -6.23665 | -0.10011 | -1.02580 | 7.57848  | 3.60723  | 0.73295  | -7.57631 | 3.66721  |
| C | 3.50450  | 3.49808  | -0.08065 | -4.73060 | -0.56772 | -1.17104 | 4.74498  | 0.41427  | -1.19934 |
| C | 4.33779  | 3.67769  | 1.03445  | -5.79912 | 0.10044  | -0.54928 | 5.80462  | -0.29788 | -0.60806 |
| C | 3.68784  | 4.32050  | -1.20307 | -5.00846 | -1.46644 | -2.21510 | 5.04411  | 1.32238  | -2.23160 |
| C | 5.33119  | 4.66029  | 1.02869  | -7.11404 | -0.12707 | -0.96056 | 7.12017  | -0.10862 | -1.03590 |
| H | 4.19783  | 3.04532  | 1.90643  | -5.59125 | 0.78496  | 0.26725  | 5.58930  | -0.99030 | 0.20029  |
| C | 4.68325  | 5.30114  | -1.21135 | -6.32246 | -1.68366 | -2.63439 | 6.35917  | 1.51052  | -2.66166 |
| H | 3.04831  | 4.18285  | -2.07027 | -4.18651 | -1.98429 | -2.70018 | 4.23389  | 1.87408  | -2.69977 |
| C | 5.50718  | 5.47434  | -0.09473 | -7.37935 | -1.01643 | -2.00675 | 7.40281  | 0.79525  | -2.06546 |
| H | 5.96488  | 4.79060  | 1.90142  | -7.93035 | 0.38764  | -0.46188 | 7.92523  | -0.66176 | -0.56015 |
| H | 4.81602  | 5.92676  | -2.08957 | -6.52021 | -2.37303 | -3.45026 | 6.56779  | 2.21142  | -3.46517 |
| H | 6.28024  | 6.23745  | -0.10010 | -8.40202 | -1.18985 | -2.32918 | 8.42620  | 0.94153  | -2.39883 |
| C | -3.50496 | 3.49763  | -0.08065 | 0.55271  | -4.62941 | 1.14164  | -0.38831 | 4.63973  | 1.16038  |
| C | -4.33827 | 3.67714  | 1.03445  | 1.20622  | -4.86480 | 2.36354  | -0.97374 | 4.90012  | 2.41025  |
| C | -3.68840 | 4.32002  | -1.20307 | 0.12349  | -5.73118 | 0.38257  | 0.03195  | 5.72148  | 0.36965  |
| C | -5.33179 | 4.65962  | 1.02868  | 1.41093  | -6.16787 | 2.82186  | -1.12499 | 6.21270  | 2.86398  |
| H | -4.19823 | 3.04479  | 1.90644  | 1.54442  | -4.01749 | 2.95285  | -1.30109 | 4.06636  | 3.02457  |
| C | -4.68392 | 5.30054  | -1.21136 | 0.33421  | -7.03481 | 0.83785  | -0.12406 | 7.03425  | 0.82124  |
| H | -3.04884 | 4.18244  | -2.07026 | -0.36223 | -5.55942 | -0.57338 | 0.46877  | 5.52779  | -0.60568 |
| C | -5.50788 | 5.47364  | -0.09474 | 0.97543  | -7.25735 | 2.06054  | -0.70069 | 7.28341  | 2.07082  |
| H | -5.96550 | 4.78986  | 1.90142  | 1.90934  | -6.33157 | 3.77315  | -1.57249 | 6.39772  | 3.83637  |
| H | -4.81677 | 5.92614  | -2.08958 | 0.00291  | -7.87560 | 0.23480  | 0.19943  | 7.86105  | 0.19518  |
| H | -6.28103 | 6.23666  | -0.10012 | 1.13732  | -8.27114 | 2.41546  | -0.82042 | 8.30413  | 2.42248  |
| C | -3.50449 | -3.49808 | -0.08065 | 4.72527  | 0.52133  | -1.22911 | -4.74191 | -0.35129 | -1.24836 |
| C | -3.68782 | -4.32051 | -1.20307 | 5.00326  | 0.81442  | -2.57319 | -5.01866 | -0.62535 | -2.59808 |
| C | -4.33779 | -3.67771 | 1.03445  | 5.79239  | 0.34826  | -0.33396 | -5.81788 | -0.15136 | -0.36750 |
| C | -4.68321 | -5.30116 | -1.21137 | 6.32397  | 0.92406  | -3.01541 | -6.33669 | -0.69227 | -3.05689 |
| H | -3.04827 | -4.18285 | -2.07026 | 4.17951  | 0.94934  | -3.26792 | -4.19237 | -0.78128 | -3.28591 |
| C | -5.33118 | -4.66032 | 1.02867  | 7.11247  | 0.46618  | -0.77525 | -7.13627 | -0.21732 | -0.82525 |
| H | -4.19784 | -3.04534 | 1.90643  | 5.58035  | 0.13014  | 0.70852  | -5.61341 | 0.04809  | 0.68064  |
| C | -5.50715 | -5.47437 | -0.09475 | 7.38194  | 0.75170  | -2.11751 | -7.39995 | -0.48748 | -2.17186 |
| H | -4.81597 | -5.92678 | -2.08958 | 6.52507  | 1.14394  | -4.06003 | -6.53211 | -0.90061 | -4.10513 |
| H | -5.96487 | -4.79064 | 1.90140  | 7.92884  | 0.33711  | -0.07034 | -7.95624 | -0.06394 | -0.12916 |
| H | -6.28020 | -6.23749 | -0.10013 | 8.40866  | 0.84032  | -2.46080 | -8.42482 | -0.53931 | -2.52802 |
| O | -0.00001 | 0.00000  | 2.05315  | -0.02685 | 0.30084  | 2.00731  | 0.02755  | -0.32303 | 2.01135  |
| V | -0.00001 | 0.00000  | 0.48032  | -0.01610 | 0.15012  | 0.44372  | 0.01189  | -0.16464 | 0.44688  |

**O=V(IV)TPP, total charge 1**

|   | Singlet  |          |          | Triplet  |          |          | Quintet  |          |          |
|---|----------|----------|----------|----------|----------|----------|----------|----------|----------|
| N | -1.81510 | -0.73281 | -0.04149 | -0.32786 | -2.00852 | -0.07237 | 1.24364  | -1.45749 | 0.02527  |
| N | -0.72479 | 1.80043  | -0.00298 | -2.00178 | 0.32838  | -0.03039 | -1.54208 | -1.14012 | 0.05125  |
| N | 1.79584  | 0.70855  | -0.01943 | 0.33102  | 2.00572  | -0.01912 | -1.22661 | 1.65332  | -0.25946 |
| N | 0.72300  | -1.83106 | -0.02407 | 2.00461  | -0.32898 | -0.08373 | 1.57532  | 1.33927  | -0.24225 |
| C | -2.18864 | -2.01779 | -0.40448 | 0.62374  | -3.00459 | -0.00185 | 2.60556  | -1.43880 | -0.24106 |
| C | -3.60459 | -2.17263 | -0.21833 | -0.00749 | -4.28513 | 0.16115  | 3.17809  | -2.73299 | 0.06999  |
| C | -4.07788 | -1.00486 | 0.31168  | -1.35593 | -4.06453 | 0.16627  | 2.16687  | -3.52290 | 0.51847  |
| C | -2.97503 | -0.08706 | 0.36749  | -1.54746 | -2.64959 | 0.00461  | 0.94596  | -2.73313 | 0.44073  |
| C | -3.07174 | 1.29648  | 0.60012  | -2.80940 | -2.02167 | -0.06814 | -0.35457 | -3.23003 | 0.66703  |
| C | -2.02052 | 2.18238  | 0.29793  | -2.99195 | -0.62301 | -0.15144 | -1.50966 | -2.47662 | 0.34154  |
| C | -2.19266 | 3.57581  | -0.00217 | -4.25925 | 0.00752  | -0.39971 | -2.82769 | -3.06024 | 0.14328  |
| C | -1.01827 | 4.01864  | -0.54539 | -4.03749 | 1.35555  | -0.40080 | -3.63583 | -2.06469 | -0.30995 |
| C | -0.08566 | 2.92778  | -0.50107 | -2.63462 | 1.54744  | -0.15421 | -2.84174 | -0.85464 | -0.34891 |
| C | 1.29091  | 3.01868  | -0.75484 | -2.01394 | 2.81358  | -0.08664 | -3.31598 | 0.40761  | -0.75786 |
| C | 2.17385  | 1.97343  | -0.44741 | -0.61753 | 3.00669  | -0.00989 | -2.54345 | 1.57787  | -0.71976 |
| C | 3.59996  | 2.10522  | -0.33563 | 0.01906  | 4.29395  | 0.05579  | -3.01370 | 2.90732  | -1.02167 |
| C | 4.07895  | 0.94264  | 0.20117  | 1.36655  | 4.07062  | 0.04707  | -1.99485 | 3.77059  | -0.72292 |
| C | 2.95971  | 0.05684  | 0.35855  | 1.55287  | 2.64607  | 0.00749  | -0.90672 | 2.96774  | -0.21890 |
| C | 3.05962  | -1.32442 | 0.60143  | 2.81298  | 2.01779  | -0.07064 | 0.39099  | 3.44299  | 0.24525  |
| C | 2.01285  | -2.21580 | 0.30827  | 3.00073  | 0.62212  | -0.15941 | 1.51927  | 2.68885  | -0.30137 |
| C | 2.15847  | -3.62974 | 0.10355  | 4.28390  | -0.01163 | -0.29391 | 2.67713  | 3.21543  | -0.97671 |
| C | 0.98656  | -4.08128 | -0.43628 | 4.06063  | -1.35873 | -0.30818 | 3.47720  | 2.14310  | -1.27735 |
| C | 0.07085  | -2.97433 | -0.46193 | 2.64422  | -1.54886 | -0.14988 | 2.80666  | 0.96748  | -0.78496 |
| C | -1.30832 | -3.07065 | -0.69551 | 2.02132  | -2.81302 | -0.06795 | 3.33291  | -0.33593 | -0.73110 |
| H | -4.15476 | -3.07906 | -0.42266 | 0.50688  | -5.22626 | 0.27981  | 4.22471  | -2.98309 | -0.02006 |
| H | -5.08861 | -0.78071 | 0.61710  | -2.14218 | -4.79303 | 0.29052  | 2.22408  | -4.54294 | 0.86662  |
| H | -3.11384 | 4.12446  | 0.12649  | -5.18918 | -0.50889 | -0.58174 | -3.06661 | -4.10358 | 0.28592  |
| H | -0.79959 | 5.00139  | -0.93515 | -4.75290 | 2.14264  | -0.58332 | -4.67050 | -2.13595 | -0.60971 |
| H | 4.15767  | 2.98848  | -0.60911 | -0.49108 | 5.24375  | 0.09766  | -3.99831 | 3.14653  | -1.39548 |
| H | 5.10335  | 0.68744  | 0.42852  | 2.15786  | 4.80438  | 0.05506  | -1.97321 | 4.84482  | -0.83535 |
| H | 3.05441  | -4.19678 | 0.30591  | 5.23043  | 0.50115  | -0.36763 | 2.84314  | 4.25867  | -1.20403 |
| H | 0.75262  | -5.08356 | -0.76194 | 4.78891  | -2.14704 | -0.42037 | 4.42915  | 2.14935  | -1.78697 |
| C | 1.86834  | 4.30248  | -1.24481 | -2.89102 | 4.01384  | -0.11825 | -4.72722 | 0.51745  | -1.23002 |
| C | 2.49982  | 4.34400  | -2.49889 | -2.80089 | 4.94341  | -1.16983 | -4.99785 | 0.81867  | -2.57439 |
| C | 1.81603  | 5.46842  | -0.46337 | -3.83023 | 4.22653  | 0.90704  | -5.79456 | 0.33246  | -0.33674 |
| C | 3.05466  | 5.53605  | -2.96936 | -3.63872 | 6.05890  | -1.19716 | -6.31777 | 0.92455  | -3.01942 |
| H | 2.54374  | 3.44457  | -3.10639 | -2.08939 | 4.77606  | -1.97288 | -4.17451 | 0.95623  | -3.26951 |
| C | 2.38158  | 6.65596  | -0.93180 | -4.65084 | 5.35494  | 0.88731  | -7.11279 | 0.44884  | -0.78314 |
| H | 1.34984  | 5.43646  | 0.51700  | -3.89842 | 3.51577  | 1.72514  | -5.58899 | 0.11290  | 0.70704  |
| C | 2.99786  | 6.69334  | -2.18668 | -4.56051 | 6.27051  | -0.16633 | -7.37676 | 0.74188  | -2.12497 |
| H | 3.53026  | 5.55987  | -3.94513 | -3.57277 | 6.76096  | -2.02270 | -6.51720 | 1.14795  | -4.06307 |
| H | 2.34490  | 7.54904  | -0.31537 | -5.35969 | 5.51858  | 1.69319  | -7.93150 | 0.31373  | -0.08292 |
| H | 3.43402  | 7.61841  | -2.55104 | -5.20560 | 7.14357  | -0.18484 | -8.40213 | 0.82807  | -2.47118 |
| C | -4.36772 | 1.89342  | 1.02478  | -4.02215 | -2.87938 | -0.06996 | -0.54825 | -4.62715 | 1.14244  |
| C | -4.43168 | 2.58467  | 2.24664  | -4.98920 | -2.73864 | 0.94254  | -1.18854 | -4.85408 | 2.37299  |
| C | -5.51578 | 1.81575  | 0.21860  | -4.22221 | -3.83806 | -1.08019 | -0.13360 | -5.72897 | 0.37514  |
| C | -5.62999 | 3.16647  | 2.66488  | -6.12391 | -3.55021 | 0.95059  | -1.39578 | -6.15654 | 2.83280  |
| H | -3.54514 | 2.65062  | 2.87068  | -4.83465 | -2.00826 | 1.73094  | -1.50870 | -4.00635 | 2.97223  |
| C | -6.70836 | 2.41115  | 0.63343  | -5.36968 | -4.63157 | -1.08119 | -0.34751 | -7.03046 | 0.83397  |
| H | -5.46473 | 1.31243  | -0.74229 | -3.48760 | -3.94070 | -1.87316 | 0.33696  | -5.56360 | -0.58994 |
| C | -6.76975 | 3.08178  | 1.85935  | -6.31949 | -4.49408 | -0.06325 | -0.97581 | -7.24693 | 2.06486  |
| H | -5.67204 | 3.68583  | 3.61740  | -6.85398 | -3.44612 | 1.74736  | -1.88186 | -6.31829 | 3.79015  |
| H | -7.58660 | 2.35614  | -0.00263 | -5.52274 | -5.35522 | -1.87594 | -0.03035 | -7.87389 | 0.22803  |
| H | -7.69952 | 3.53990  | 2.18241  | -7.20754 | -5.11865 | -0.06058 | -1.13926 | -8.25927 | 2.42153  |
| C | -1.89724 | -4.37053 | -1.12890 | 2.89188  | -4.01819 | -0.05255 | 4.73477  | -0.55944 | -1.17447 |
| C | -1.86252 | -5.50011 | -0.29506 | 3.81242  | -4.21415 | 0.99289  | 5.79921  | 0.12345  | -0.55987 |
| C | -2.52753 | -4.45989 | -2.38075 | 2.80455  | -4.97632 | -1.07848 | 5.01152  | -1.46708 | -2.21220 |
| C | -2.44258 | -6.70025 | -0.71094 | 4.62005  | -5.35177 | 1.01565  | 7.11328  | -0.10127 | -0.97328 |
| H | -1.39895 | -5.42964 | 0.68459  | 3.87513  | -3.48378 | 1.79394  | 5.59433  | 0.80932  | 0.25670  |
| C | -3.09742 | -5.66469 | -2.79838 | 3.62973  | -6.10144 | -1.06342 | 6.32548  | -1.67828 | -2.63317 |
| H | -2.55966 | -3.58779 | -3.02760 | 2.10404  | -4.82439 | -1.89419 | 4.19277  | -1.99019 | -2.69762 |
| C | -3.05696 | -6.78620 | -1.96441 | 4.53471  | -6.29452 | -0.01427 | 7.37873  | -0.99842 | -2.01303 |
| H | -2.41910 | -7.56485 | -0.05455 | 5.31428  | -5.50191 | 1.83673  | 7.92875  | 0.42001  | -0.48128 |
| H | -3.57231 | -5.72603 | -3.77287 | 3.56646  | -6.82585 | -1.86963 | 6.52608  | -2.37106 | -3.44470 |
| H | -3.50465 | -7.72097 | -2.28768 | 5.16989  | -7.17489 | 0.00055  | 8.40097  | -1.16815 | -2.33696 |
| C | 4.38697  | -1.85324 | 1.02829  | 4.02219  | 2.88870  | -0.07090 | 0.55178  | 4.55268  | 1.13308  |
| C | 4.85143  | -1.56730 | 2.32222  | 4.37134  | 3.60791  | 1.08460  | -0.57483 | 5.21106  | 1.71615  |
| C | 5.19544  | -2.59794 | 0.15474  | 4.82078  | 3.00299  | -1.22112 | 1.84550  | 5.00448  | 1.53836  |



|   |          |          |          |         |          |          |          |         |         |
|---|----------|----------|----------|---------|----------|----------|----------|---------|---------|
| C | 6.09789  | -2.03780 | 2.74157  | 5.50755 | 4.41915  | 1.09068  | -0.41327 | 6.27566 | 2.58963 |
| H | 4.23030  | -0.98700 | 2.99852  | 3.75993 | 3.51685  | 1.97759  | -1.57656 | 4.86014 | 1.49908 |
| C | 6.44578  | -3.05731 | 0.57399  | 5.94648 | 3.82870  | -1.21592 | 1.99386  | 6.07083 | 2.41224 |
| H | 4.85283  | -2.79730 | -0.85649 | 4.54821 | 2.45735  | -2.11979 | 2.73187  | 4.49937 | 1.17400 |
| C | 6.89701  | -2.78253 | 1.86890  | 6.29471 | 4.53432  | -0.05958 | 0.86954  | 6.72617 | 2.93693 |
| H | 6.44344  | -1.82116 | 3.74780  | 5.77676 | 4.96002  | 1.99277  | -1.28957 | 6.75418 | 3.01624 |
| H | 7.06808  | -3.62430 | -0.11175 | 6.54962 | 3.92104  | -2.11401 | 2.99074  | 6.39265 | 2.69788 |
| H | 7.86789  | -3.14338 | 2.19431  | 7.17422 | 5.17081  | -0.05522 | 0.99091  | 7.56160 | 3.61906 |
| O | -0.01103 | -0.03407 | 2.02960  | 0.02752 | -0.03529 | 2.01836  | 0.03641  | 0.30293 | 2.01994 |
| V | -0.00524 | -0.01417 | 0.47495  | 0.00574 | -0.00629 | 0.45458  | 0.01905  | 0.14961 | 0.46110 |

### ZnTPP, total charge 0

|   | Singlet  |          |          | Triplet  |          |          | Quintet  |          |          |
|---|----------|----------|----------|----------|----------|----------|----------|----------|----------|
| N | -2.01605 | 0.39031  | 0.00141  | -2.06035 | -0.00013 | -0.04239 | 2.06797  | 0.00000  | -0.04620 |
| N | 0.39049  | 2.01615  | 0.00090  | -0.00013 | 2.07772  | 0.00003  | 0.00000  | -2.06913 | 0.00002  |
| N | 2.01609  | -0.39033 | 0.00116  | 2.06035  | 0.00013  | 0.04239  | -2.06797 | 0.00000  | 0.04617  |
| N | -0.39042 | -2.01616 | 0.00128  | 0.00013  | -2.07772 | 0.00003  | 0.00000  | 2.06913  | 0.00002  |
| C | -3.03139 | -0.54039 | 0.00421  | -2.88525 | -1.10439 | 0.02015  | 2.89242  | 1.10768  | 0.00887  |
| C | -4.30881 | 0.13972  | -0.00229 | -4.24028 | -0.69432 | 0.13307  | 4.26834  | 0.68511  | 0.10947  |
| C | -4.04950 | 1.47885  | 0.00353  | -4.24037 | 0.69377  | 0.13307  | 4.26834  | -0.68511 | 0.10948  |
| C | -2.61045 | 1.63289  | -0.00205 | -2.88539 | 1.10402  | 0.02015  | 2.89242  | -1.10767 | 0.00888  |
| C | -1.93765 | 2.86842  | 0.00063  | -2.44196 | 2.47187  | 0.01478  | 2.46312  | -2.46372 | 0.00981  |
| C | -0.54028 | 3.03142  | 0.00365  | -1.10829 | 2.90033  | 0.00848  | 1.10789  | -2.89516 | 0.00490  |
| C | 0.13972  | 4.30888  | -0.00215 | -0.68077 | 4.28634  | -0.00267 | 0.68510  | -4.27463 | -0.00479 |
| C | 1.47888  | 4.04965  | 0.00357  | 0.68024  | 4.28642  | 0.00243  | -0.68510 | -4.27463 | 0.00448  |
| C | 1.63302  | 2.61060  | -0.00212 | 1.10792  | 2.90047  | -0.00852 | -1.10789 | -2.89516 | -0.00500 |
| C | 2.86860  | 1.93779  | 0.00061  | 2.44164  | 2.47217  | -0.01475 | -2.46311 | -2.46372 | -0.00981 |
| C | 3.03145  | 0.54036  | 0.00365  | 2.88525  | 1.10439  | -0.02002 | -2.89242 | -1.10767 | -0.00878 |
| C | 4.30885  | -0.13978 | -0.00308 | 4.24031  | 0.69432  | -0.13271 | -4.26836 | -0.68511 | -0.10916 |
| C | 4.04952  | -1.47892 | 0.00281  | 4.24040  | -0.69377 | -0.13271 | -4.26836 | 0.68511  | -0.10916 |
| C | 2.61047  | -1.63293 | -0.00236 | 2.88539  | -1.10402 | -0.02002 | -2.89242 | 1.10767  | -0.00877 |
| C | 1.93768  | -2.86847 | 0.00047  | 2.44196  | -2.47186 | -0.01476 | -2.46312 | 2.46372  | -0.00979 |
| C | 0.54031  | -3.03146 | 0.00374  | 1.10829  | -2.90033 | -0.00853 | -1.10789 | 2.89516  | -0.00499 |
| C | -0.13973 | -4.30891 | -0.00202 | 0.68078  | 4.28634  | 0.00242  | -0.68511 | 4.27463  | 0.00449  |
| C | -1.47889 | -4.04963 | 0.00386  | -0.68023 | -4.28642 | -0.00267 | 0.68510  | 4.27463  | -0.00480 |
| C | -1.63297 | -2.61059 | -0.00157 | -1.10792 | -2.90047 | 0.00847  | 1.10789  | 2.89517  | 0.00490  |
| C | -2.86852 | -1.93780 | 0.00126  | -2.44164 | -2.47218 | 0.01478  | 2.46312  | 2.46373  | 0.00979  |
| H | -5.27331 | -0.34658 | -0.00997 | -5.09411 | -1.34890 | 0.22300  | 5.11905  | 1.34439  | 0.19427  |
| H | -4.76280 | 2.29003  | 0.01032  | -5.09428 | 1.34825  | 0.22300  | 5.11905  | -1.34439 | 0.19428  |
| H | -0.34652 | 5.27343  | -0.00983 | -1.33878 | 5.14239  | -0.01488 | 1.34357  | -5.12993 | -0.01847 |
| H | 2.28994  | 4.76307  | 0.01099  | 1.33814  | 5.14256  | 0.01451  | -1.34357 | -5.12993 | 0.01802  |
| H | 5.27337  | 0.34647  | -0.01119 | 5.09415  | -1.34890 | -0.22251 | -5.11908 | -1.34439 | -0.19383 |
| H | 4.76282  | -2.29011 | 0.00927  | 5.09432  | -1.34825 | -0.22251 | -5.11908 | 1.34439  | -0.19382 |
| H | 0.34649  | -5.27347 | -0.00980 | 1.33880  | -5.14238 | 0.01451  | -1.34358 | 5.12993  | 0.01803  |
| H | -2.28997 | -4.76303 | 0.01126  | -1.33813 | -5.14256 | -0.01488 | 1.34356  | 5.12994  | -0.01848 |
| C | 4.11013  | 2.77661  | -0.00057 | 3.50579  | 3.51763  | -0.03348 | -3.52054 | -3.51443 | -0.03219 |
| C | 4.89686  | 2.88957  | 1.15593  | 4.37062  | 3.67279  | 1.06292  | -4.38556 | -3.68238 | 1.06250  |
| C | 4.50704  | 3.46362  | -1.15813 | 3.66708  | 4.35929  | -1.14616 | -3.67753 | -4.35376 | -1.14829 |
| C | 6.05461  | 3.67239  | 1.15623  | 5.36250  | 4.65545  | 1.05239  | -5.37787 | -4.66539 | 1.04400  |
| H | 4.59309  | 2.36227  | 2.05580  | 4.25499  | 3.02126  | 1.92392  | -4.27026 | -3.03927 | 1.93022  |
| C | 5.66531  | 4.24566  | -1.16015 | 4.66631  | 5.33575  | -1.16121 | -4.67287 | -5.33365 | -1.17007 |
| H | 3.90385  | 3.37763  | -2.05748 | 3.00876  | 4.23776  | -2.00133 | -3.01714 | -4.22762 | -2.00136 |
| C | 6.44236  | 4.35257  | -0.00242 | 5.51497  | 5.48902  | -0.06080 | -5.52564 | -5.49382 | -0.07313 |
| H | 6.65088  | 3.75215  | 2.06093  | 6.01606  | 4.76963  | 1.91265  | -6.03304 | -4.78534 | 1.90235  |
| H | 5.96081  | 4.76854  | -2.06551 | 4.78193  | 5.97398  | -2.03272 | -4.78392 | -5.96886 | -2.04447 |
| H | 7.34235  | 4.96087  | -0.00309 | 6.28982  | 6.25024  | -0.07067 | -6.29850 | -6.25698 | -0.08891 |
| C | -2.77654 | 4.10996  | 0.00007  | -3.50624 | 3.51718  | 0.03347  | 3.52054  | -3.51443 | 0.03219  |
| C | -2.89287 | 4.89366  | 1.15830  | -3.66749 | 4.35902  | 1.14603  | 3.67736  | -4.35395 | 1.14817  |
| C | -3.46020 | 4.50971  | -1.15843 | -4.37124 | 3.67203  | -1.06284 | 4.38574  | -3.68220 | -1.06239 |
| C | -3.67575 | 6.05136  | 1.15932  | -4.66685 | 5.33535  | 1.16104  | 4.67269  | -5.33384 | 1.16995  |
| H | -2.36818 | 4.58749  | 2.05891  | -3.00905 | 4.23772  | 2.00113  | 3.01683  | -4.22795 | 2.00116  |
| C | -4.24240 | 5.66790  | -1.15968 | -5.36325 | 4.65457  | -1.05234 | 5.37806  | -4.66520 | -1.04389 |
| H | -3.37161 | 3.90886  | -2.05910 | -4.25565 | 3.02037  | -1.92374 | 4.27058  | -3.03894 | -1.93002 |
| C | -4.35266 | 6.44199  | -0.00029 | -5.51568 | 5.48831  | 0.06072  | 5.52565  | -5.49382 | 0.07313  |
| H | -3.75816 | 6.64533  | 2.06530  | -4.78244 | 5.97371  | 2.03246  | 4.78361  | -5.96919 | 2.04426  |
| H | -4.76277 | 5.96566  | -2.06573 | -6.01695 | 4.76851  | -1.91253 | 6.03337  | -4.78501 | -1.90216 |
| H | -4.96106 | 7.34191  | -0.00039 | -6.29063 | 6.24943  | 0.07056  | 6.29850  | -6.25698 | 0.08890  |
| C | -4.11005 | -2.77669 | -0.00026 | -3.50579 | -3.51763 | 0.03347  | 3.52054  | 3.51443  | 0.03216  |

|    |          |          |          |          |          |          |          |         |          |
|----|----------|----------|----------|----------|----------|----------|----------|---------|----------|
| C  | -4.50848 | -3.46064 | -1.15910 | -3.66693 | -4.35949 | 1.14603  | 3.67737  | 4.35396 | 1.14813  |
| C  | -4.89531 | -2.89250 | 1.15695  | -4.37077 | -3.67259 | -1.06284 | 4.38574  | 3.68219 | -1.06242 |
| C  | -5.66688 | -4.24247 | -1.16174 | -4.66617 | -5.33594 | 1.16104  | 4.67270  | 5.33385 | 1.16990  |
| H  | -3.90628 | -3.37250 | -2.05891 | -3.00851 | -4.23811 | 2.00113  | 3.01684  | 4.22797 | 2.00113  |
| C  | -6.05323 | -3.67510 | 1.15660  | -5.36266 | -4.65525 | -1.05234 | 5.37805  | 4.66520 | -1.04394 |
| H  | -4.59030 | -2.36774 | 2.05790  | -4.25526 | -3.02092 | -1.92374 | 4.27057  | 3.03893 | -1.93005 |
| C  | -6.44257 | -4.35215 | -0.00335 | -5.51498 | -5.48902 | 0.06072  | 5.52565  | 5.49383 | 0.07307  |
| H  | -5.96358 | -4.76299 | -2.06806 | -4.78168 | -5.97432 | 2.03246  | 4.78363  | 5.96921 | 2.04420  |
| H  | -6.64845 | -3.75705 | 2.06180  | -6.01634 | -4.76928 | -1.91253 | 6.03335  | 4.78500 | -1.90221 |
| H  | -7.34274 | -4.96018 | -0.00450 | -6.28984 | -6.25023 | 0.07057  | 6.29851  | 6.25698 | 0.08883  |
| C  | 2.77653  | -4.11001 | -0.00019 | 3.50624  | -3.51718 | -0.03348 | -3.52055 | 3.51443 | -0.03216 |
| C  | 3.46015  | -4.50972 | -1.15874 | 4.37109  | -3.67223 | 1.06293  | -4.38555 | 3.68237 | 1.06254  |
| C  | 2.89286  | -4.89377 | 1.15800  | 3.66763  | -4.35883 | -1.14616 | -3.67755 | 4.35376 | -1.14825 |
| C  | 4.24230  | -5.66794 | -1.16007 | 5.36309  | -4.65476 | 1.05239  | -5.37787 | 4.66538 | 1.04405  |
| H  | 3.37156  | -3.90880 | -2.05937 | 4.25537  | -3.02072 | 1.92392  | -4.27024 | 3.03925 | 1.93026  |
| C  | 3.67571  | -6.05151 | 1.15893  | 4.66699  | -5.33516 | -1.16121 | -4.67288 | 5.33365 | -1.17002 |
| H  | 2.36820  | -4.58765 | 2.05864  | 3.00931  | -4.23738 | -2.00134 | -3.01716 | 4.22763 | -2.00133 |
| C  | 4.35256  | -6.44210 | -0.00072 | 5.51567  | -5.48832 | -0.06080 | -5.52565 | 5.49382 | -0.07307 |
| H  | 4.76263  | -5.96566 | -2.06616 | 6.01667  | -4.76886 | 1.91265  | -6.03303 | 4.78533 | 1.90241  |
| H  | 3.75812  | -6.64552 | 2.06488  | 4.78269  | -5.97337 | -2.03272 | -4.78395 | 5.96886 | -2.04441 |
| H  | 4.96094  | -7.34204 | -0.00089 | 6.29062  | -6.24944 | -0.07067 | -6.29851 | 6.25697 | -0.08884 |
| Zn | 0.00003  | -0.00002 | 0.00152  | 0.00000  | 0.00000  | 0.00002  | 0.00000  | 0.00000 | 0.00000  |

### ZnTPP, total charge 1

|   | Doublet  |          |          | Quartet  |          |          | Sextet   |          |          |
|---|----------|----------|----------|----------|----------|----------|----------|----------|----------|
| N | 2.06062  | -0.00001 | -0.06796 | 2.06069  | 0.00018  | -0.05835 | -2.08335 | 0.00000  | -0.07665 |
| N | -0.00001 | -2.06073 | 0.00000  | 0.00017  | -2.05913 | -0.00001 | 0.01688  | 2.03651  | -0.00600 |
| N | -2.06062 | 0.00001  | 0.06796  | -2.06068 | -0.00018 | 0.05831  | 2.14026  | 0.00000  | 0.02165  |
| N | 0.00001  | 2.06074  | 0.00000  | -0.00016 | 2.05914  | -0.00001 | 0.01688  | -2.03651 | -0.00600 |
| C | 2.88062  | 1.10209  | -0.00068 | 2.88257  | 1.10748  | 0.00045  | -2.90371 | -1.10674 | -0.02216 |
| C | 4.25463  | 0.68311  | 0.12432  | 4.27807  | 0.67585  | 0.11013  | -4.29362 | -0.67874 | 0.07146  |
| C | 4.25463  | -0.68315 | 0.12433  | 4.27819  | -0.67514 | 0.11015  | -4.29362 | 0.67874  | 0.07147  |
| C | 2.88061  | -1.10212 | -0.00067 | 2.88277  | -1.10701 | 0.00048  | -2.90371 | 1.10674  | -0.02216 |
| C | 2.45233  | -2.45278 | 0.00715  | 2.47375  | -2.44454 | 0.01091  | -2.46999 | 2.44950  | -0.00443 |
| C | 1.10247  | -2.88315 | 0.00387  | 1.10167  | -2.88385 | 0.00463  | -1.11148 | 2.86703  | -0.00318 |
| C | 0.68306  | -4.26252 | -0.00753 | 0.68723  | -4.25916 | -0.00657 | -0.69290 | 4.23924  | -0.00812 |
| C | -0.68310 | -4.26252 | 0.00741  | -0.68649 | -4.25928 | 0.00610  | 0.67820  | 4.24549  | 0.00718  |
| C | -1.10250 | -2.88314 | -0.00391 | -1.10116 | -2.88402 | -0.00481 | 1.10465  | 2.87207  | -0.00558 |
| C | -2.45235 | -2.45275 | -0.00715 | -2.47333 | -2.44495 | -0.01095 | 2.48924  | 2.47442  | -0.01244 |
| C | -2.88062 | -1.10209 | 0.00072  | -2.88257 | -1.10748 | -0.00041 | 2.95841  | 1.14185  | -0.02447 |
| C | -4.25464 | -0.68311 | -0.12420 | -4.27809 | -0.67584 | -0.10988 | 4.30212  | 0.73535  | -0.13398 |
| C | -4.25464 | 0.68315  | -0.12419 | -4.27820 | 0.67515  | -0.10986 | 4.30212  | -0.73535 | -0.13398 |
| C | -2.88061 | 1.10212  | 0.00073  | -2.88277 | 1.10702  | -0.00039 | 2.95841  | -1.14185 | -0.02447 |
| C | -2.45232 | 2.45277  | -0.00713 | -2.47374 | 2.44453  | -0.01089 | 2.48924  | -2.47442 | -0.01243 |
| C | -1.10247 | 2.88315  | -0.00391 | -1.10166 | 2.88385  | -0.00476 | 1.10466  | -2.87207 | -0.00558 |
| C | -0.68306 | 4.26252  | 0.00741  | -0.68722 | 4.25917  | 0.00618  | 0.67820  | -4.24549 | 0.00718  |
| C | 0.68310  | 4.26252  | -0.00755 | 0.68649  | 4.25928  | -0.00653 | -0.69289 | -4.23925 | -0.00813 |
| C | 1.10250  | 2.88314  | 0.00386  | 1.10116  | 2.88403  | 0.00462  | -1.11148 | -2.86703 | -0.00319 |
| C | 2.45235  | -2.45276 | 0.00713  | 2.47334  | -2.44495 | 0.01087  | -2.46999 | -2.44951 | -0.00444 |
| H | 5.10408  | 1.34031  | 0.23090  | 5.12453  | 1.33854  | 0.20831  | -5.14180 | -1.34143 | 0.15362  |
| H | 5.10407  | -1.34035 | 0.23092  | 5.12476  | -1.33768 | 0.20835  | -5.14180 | 1.34142  | 0.15362  |
| H | 1.33917  | -5.11903 | -0.02904 | 1.34538  | -5.11398 | -0.02490 | -1.35380 | 5.09208  | -0.02608 |
| H | -1.33922 | -5.11901 | 0.02887  | -1.34450 | -5.11421 | 0.02426  | 1.33240  | 5.10336  | 0.02403  |
| H | -5.10410 | -1.34030 | -0.23073 | -5.12456 | -1.33853 | -0.20795 | 5.16251  | 1.37873  | -0.24379 |
| H | -5.10409 | 1.34036  | -0.23071 | -5.12479 | 1.33769  | -0.20790 | 5.16251  | -1.37873 | -0.24378 |
| H | -1.33917 | 5.11903  | 0.02887  | -1.34538 | 5.11399  | 0.02437  | 1.33241  | -5.10336 | 0.02402  |
| H | 1.33921  | 5.11901  | -0.02908 | 1.34450  | 5.11421  | -0.02487 | -1.35379 | -5.09208 | -0.02609 |
| C | -3.50920 | -3.50130 | -0.03382 | -3.52445 | -3.49950 | -0.03467 | 3.52536  | 3.54381  | -0.02460 |
| C | -4.41060 | -3.62671 | 1.03803  | -4.40799 | -3.64669 | 1.04852  | 4.38416  | 3.71108  | 1.07599  |
| C | -3.62377 | -4.37359 | -1.13068 | -3.64990 | -4.35916 | -1.14022 | 3.67431  | 4.38737  | -1.13880 |
| C | -5.39754 | -4.61331 | 1.01766  | -5.39463 | -4.63492 | 1.02730  | 5.36698  | 4.70395  | 1.06430  |
| H | -4.32293 | -2.96036 | 1.89100  | -4.30861 | -2.99418 | 1.91122  | 4.26617  | 3.07294  | 1.94758  |
| C | -4.62495 | -5.34556 | -1.15685 | -4.64576 | -5.33680 | -1.16495 | 4.66377  | 5.37305  | -1.15275 |
| H | -2.93888 | -4.27375 | -1.96742 | -2.97598 | -4.24707 | -1.98458 | 3.01795  | 4.26270  | -1.99529 |
| C | -5.51015 | -5.47141 | -0.08115 | -5.51793 | -5.47941 | -0.08022 | 5.51062  | 5.53498  | -0.05108 |
| H | -6.07768 | -4.71113 | 1.85830  | -6.06385 | -4.74551 | 1.87516  | 6.01501  | 4.83079  | 1.92633  |
| H | -4.71391 | -6.00288 | -2.01641 | -4.74198 | -5.98494 | -2.03076 | 4.77376  | 6.01260  | -2.02335 |
| H | -6.28353 | -6.23316 | -0.09942 | -6.28812 | -6.24440 | -0.09836 | 6.27580  | 6.30511  | -0.06136 |
| C | 3.50917  | -3.50133 | 0.03382  | 3.52504  | -3.49891 | 0.03469  | -3.51911 | 3.50832  | 0.03348  |
| C | 3.62367  | -4.37369 | 1.13063  | 3.65043  | -4.35870 | 1.14014  | -3.66606 | 4.32797  | 1.16544  |

|    |          |          |          |          |          |          |          |          |          |
|----|----------|----------|----------|----------|----------|----------|----------|----------|----------|
| C  | 4.41063  | -3.62669 | -1.03799 | 4.40879  | -3.64582 | -1.04837 | -4.38273 | 3.69231  | -1.05923 |
| C  | 4.62484  | -5.34566 | 1.15681  | 4.64646  | -5.33618 | 1.16493  | -4.66010 | 5.30816  | 1.20449  |
| H  | 2.93873  | -4.27389 | 1.96735  | 2.97634  | -4.24683 | 1.98440  | -3.00757 | 4.18505  | 2.01734  |
| C  | 5.39756  | -4.61330 | -1.01762 | 5.39559  | -4.63389 | -1.02711 | -5.36929 | 4.68033  | -1.02258 |
| H  | 4.32300  | -2.96030 | -1.89092 | 4.30945  | -2.99322 | -1.91101 | -4.27002 | 3.06736  | -1.94061 |
| C  | 5.51009  | -5.47146 | 0.08114  | 5.51884  | -5.47851 | 0.08033  | -5.51185 | 5.48843  | 0.10999  |
| H  | 4.71375  | -6.00304 | 2.01634  | 4.74263  | -5.98441 | 2.03067  | -4.77025 | 5.92796  | 2.08926  |
| H  | 6.07774  | -4.71108 | -1.85823 | 6.06498  | -4.74427 | -1.87486 | -6.02364 | 4.81959  | -1.87788 |
| H  | 6.28347  | -6.23323 | 0.09942  | 6.28915  | -6.24337 | 0.09851  | -6.28192 | 6.25323  | 0.13956  |
| C  | 3.50921  | 3.50130  | 0.03379  | 3.52445  | 3.49950  | 0.03458  | -3.51911 | -3.50833 | 0.03347  |
| C  | 3.62372  | 4.37367  | 1.13059  | 3.64974  | 4.35935  | 1.14001  | -3.66605 | -4.32798 | 1.16542  |
| C  | 4.41066  | 3.62663  | -1.03803 | 4.40816  | 3.64652  | -1.04850 | -4.38272 | -3.69231 | -1.05924 |
| C  | 4.62490  | 5.34563  | 1.15675  | 4.64560  | 5.33699  | 1.16473  | -4.66009 | -5.30817 | 1.20447  |
| H  | 2.93879  | 4.27389  | 1.96731  | 2.97569  | 4.24740  | 1.98429  | -3.00756 | -4.18507 | 2.01732  |
| C  | 5.39760  | 4.61323  | -1.01768 | 5.39480  | 4.63474  | -1.02729 | -5.36929 | -4.68033 | -1.02260 |
| H  | 4.32303  | 2.96023  | -1.89096 | 4.30891  | 2.99387  | -1.91111 | -4.27001 | -3.06735 | -1.94062 |
| C  | 5.51015  | 5.47140  | 0.08107  | 5.51794  | 5.47942  | 0.08011  | -5.51185 | -5.48844 | 0.10996  |
| H  | 4.71382  | 6.00301  | 2.01627  | 4.74169  | 5.98526  | 2.03045  | -4.77024 | -5.92798 | 2.08923  |
| H  | 6.07778  | 4.71100  | -1.85829 | 6.06415  | 4.74520  | -1.87506 | -6.02364 | -4.81959 | -1.87790 |
| H  | 6.28354  | 6.23316  | 0.09934  | 6.28813  | 6.24440  | 0.09825  | -6.28191 | -6.25324 | 0.13952  |
| C  | -3.50917 | 3.50133  | -0.03379 | -3.52504 | 3.49891  | -0.03458 | 3.52537  | -3.54380 | -0.02458 |
| C  | -4.41055 | 3.62674  | 1.03808  | -4.40857 | 3.64594  | 1.04865  | 4.38416  | -3.71107 | 1.07601  |
| C  | -3.62375 | 4.37363  | -1.13064 | -3.65067 | 4.35856  | -1.14011 | 3.67433  | -4.38736 | -1.13878 |
| C  | -5.39748 | 4.61336  | 1.01773  | -5.39538 | 4.63400  | 1.02747  | 5.36698  | -4.70393 | 1.06433  |
| H  | -4.32287 | 2.96040  | 1.89104  | -4.30905 | 2.99343  | 1.91134  | 4.26616  | -3.07293 | 1.94760  |
| C  | -4.62492 | 5.34560  | -1.15679 | -4.64671 | 5.33603  | -1.16481 | 4.66378  | -5.37304 | -1.15272 |
| H  | -2.93887 | 4.27379  | -1.96739 | -2.97675 | 4.24659  | -1.98449 | 3.01797  | -4.26269 | -1.99528 |
| C  | -5.51010 | 5.47146  | -0.08107 | -5.51887 | 5.47848  | -0.08004 | 5.51063  | -5.53497 | -0.05105 |
| H  | -6.07761 | 4.71118  | 1.85838  | -6.06460 | 4.74447  | 1.87535  | 6.01501  | -4.83077 | 1.92636  |
| H  | -4.71389 | 6.00293  | -2.01635 | -4.74306 | 5.98415  | -2.03060 | 4.77378  | -6.01259 | -2.02332 |
| H  | -6.28347 | 6.23322  | -0.09933 | -6.28919 | 6.24333  | -0.09816 | 6.27581  | -6.30510 | -0.06132 |
| Zn | 0.00000  | 0.00000  | 0.00000  | 0.00000  | 0.00000  | -0.00001 | -0.05162 | 0.00000  | -0.02057 |

### H-ZnTPP, total charge 0

|   | Doublet  |          | Quartet  |          |          | Sextet   |          |          |          |
|---|----------|----------|----------|----------|----------|----------|----------|----------|----------|
| N | 2.05878  | -0.00003 | -0.06880 | 2.05955  | 0.00135  | -0.07336 | -1.42003 | -1.37348 | -0.00834 |
| N | 0.00135  | -2.05783 | -0.02748 | -0.00159 | -2.07834 | -0.02207 | -1.49745 | 1.51199  | -0.23330 |
| N | -2.05689 | 0.00003  | 0.01365  | -2.06361 | -0.00135 | 0.03495  | 1.44293  | 1.56742  | -0.23015 |
| N | 0.00140  | 2.05785  | -0.02752 | -0.00430 | 2.07834  | -0.02206 | 1.47073  | -1.30559 | 0.05045  |
| C | 2.87839  | 1.10027  | -0.03799 | 2.88373  | 1.10695  | -0.00997 | -1.20834 | -2.67843 | 0.41477  |
| C | 4.26579  | 0.68149  | 0.01771  | 4.23788  | 0.69787  | 0.09629  | -2.48486 | -3.34441 | 0.55492  |
| C | 4.26577  | -0.68159 | 0.01773  | 4.23879  | -0.69232 | 0.09629  | -3.44777 | -2.45193 | 0.17757  |
| C | 2.87836  | -1.10035 | -0.03799 | 2.88518  | -1.10317 | -0.00994 | -2.76964 | -1.21312 | -0.17189 |
| C | 2.44516  | -2.44278 | -0.03561 | 2.44066  | -2.47125 | -0.00388 | -3.42035 | -0.02068 | -0.59667 |
| C | 1.10220  | -2.87646 | -0.03673 | 1.10712  | -2.89966 | -0.00713 | -2.78092 | 1.25358  | -0.66622 |
| C | 0.68409  | -4.26448 | -0.07133 | 0.68068  | -4.28623 | -0.00746 | -3.36742 | 2.48022  | -1.14246 |
| C | -0.67915 | -4.26557 | -0.06594 | -0.68033 | -4.28716 | -0.00143 | -2.43193 | 3.48063  | -0.94056 |
| C | -1.09900 | -2.87787 | -0.04562 | -1.10881 | -2.90143 | -0.02167 | -1.29364 | 2.86565  | -0.34613 |
| C | -2.44114 | -2.44378 | -0.05154 | -2.44306 | -2.47362 | -0.02462 | -0.06276 | 3.50896  | 0.12571  |
| C | -2.87382 | -1.10044 | -0.04456 | -2.88713 | -1.10601 | -0.03174 | 1.19830  | 2.91314  | -0.33008 |
| C | -4.25747 | -0.68161 | -0.15521 | -4.24204 | -0.69676 | -0.15160 | 2.32671  | 3.57446  | -0.89811 |
| C | -4.25745 | 0.68171  | -0.15521 | -4.24295 | 0.69122  | -0.15159 | 3.29533  | 2.60812  | -1.10011 |
| C | -2.87380 | 1.10051  | -0.04456 | -2.88857 | 1.10224  | -0.03173 | 2.73896  | 1.35620  | -0.65074 |
| C | -2.44108 | 2.44384  | -0.05155 | -2.44629 | 2.47043  | -0.02461 | 3.41461  | 0.10016  | -0.60199 |
| C | -1.09893 | 2.87791  | -0.04563 | -1.11260 | 2.89998  | -0.02167 | 2.80696  | -1.11652 | -0.19024 |
| C | -0.67904 | 4.26561  | -0.06596 | -0.68594 | 4.28627  | -0.00143 | 3.51704  | -2.36630 | 0.04103  |
| C | 0.68419  | -4.26448 | -0.07128 | 0.67507  | -4.28713 | -0.00749 | 2.58689  | -3.29429 | 0.41215  |
| C | 1.10227  | 2.87645  | -0.03675 | 1.10333  | 2.90112  | -0.00716 | 1.29887  | -2.63395 | 0.40406  |
| C | 2.44522  | 2.44272  | -0.03562 | 2.43744  | 2.47444  | -0.00393 | 0.05655  | -3.26945 | 0.63023  |
| H | 5.11924  | 1.34167  | 0.06649  | 5.09244  | 1.35218  | 0.18112  | -2.62609 | -4.35832 | 0.89915  |
| H | 5.11921  | -1.34179 | 0.06653  | 5.09421  | -1.34549 | 0.18113  | -4.51734 | -2.60082 | 0.16208  |
| H | 1.34444  | -5.11856 | -0.10218 | 1.33935  | -5.14186 | -0.01375 | -4.34682 | 2.57488  | -1.58778 |
| H | -1.33825 | -5.12105 | -0.07733 | -1.33754 | -5.14368 | 0.01790  | -2.51855 | 4.52882  | -1.19036 |
| H | -5.10727 | -1.34202 | -0.24606 | -5.09497 | -1.35177 | -0.24672 | 2.38342  | 4.62841  | -1.13150 |
| H | -5.10724 | 1.34214  | -0.24606 | -5.09674 | 1.34511  | -0.24671 | 4.27941  | 2.74029  | -1.52497 |
| H | -1.33813 | 5.12110  | -0.07735 | -1.34428 | 5.14193  | 0.01790  | 4.58300  | -2.50426 | -0.06257 |
| H | 1.34458  | 5.11854  | -0.10208 | 1.33261  | 5.14362  | -0.01380 | 2.75123  | -4.33543 | 0.64852  |
| C | -3.50284 | -3.49737 | -0.08182 | -3.50670 | -3.51932 | -0.03740 | -0.09091 | 4.65462  | 0.99233  |
| C | -4.32443 | -3.70880 | 1.03644  | -3.66489 | -4.37067 | -1.14329 | 1.10811  | 5.25485  | 1.48695  |
| C | -3.69844 | -4.28534 | -1.22678 | -4.37457 | -3.66542 | 1.05798  | -1.31936 | 5.21296  | 1.46321  |

|    |          |          |          |          |          |          |          |          |          |
|----|----------|----------|----------|----------|----------|----------|----------|----------|----------|
| C  | -5.31723 | -4.69149 | 1.01235  | -4.66383 | -5.34743 | -1.15265 | 1.07438  | 6.35198  | 2.33744  |
| H  | -4.17638 | -3.10179 | 1.92486  | -3.00457 | -4.25608 | -1.99787 | 2.06758  | 4.83534  | 1.21079  |
| C  | -4.69599 | -5.26312 | -1.25381 | -5.36599 | -4.64849 | 1.05326  | -1.34016 | 6.31053  | 2.31350  |
| H  | -3.06815 | -4.12253 | -2.09622 | -4.26138 | -3.00653 | 1.91366  | -2.25811 | 4.76096  | 1.16772  |
| C  | -5.50694 | -5.47035 | -0.13348 | -5.51530 | -5.49162 | -0.05317 | -0.14692 | 6.90273  | 2.75172  |
| H  | -5.94093 | -4.84800 | 1.88794  | -4.77713 | -5.99296 | -2.01907 | 2.00927  | 6.77894  | 2.69039  |
| H  | -4.83981 | -5.86075 | -2.14955 | -6.02172 | -4.75559 | 1.91279  | -2.29596 | 6.70518  | 2.64756  |
| H  | -6.28078 | -6.23238 | -0.15345 | -6.28990 | -6.25314 | -0.05858 | -0.16824 | 7.76278  | 3.41424  |
| C  | 3.50317  | -3.50046 | -0.02274 | 3.50487  | -3.51645 | 0.02458  | -4.86243 | -0.10459 | -0.94643 |
| C  | 3.70030  | -4.29655 | 1.11641  | 3.66774  | -4.34534 | 1.14658  | -5.82014 | 0.68503  | -0.28266 |
| C  | 4.31563  | -3.71160 | -1.14758 | 4.36793  | -3.68422 | -1.07132 | -5.30696 | -0.98714 | -1.94879 |
| C  | 4.69139  | -5.28109 | 1.13149  | 4.66694  | -5.32159 | 1.17129  | -7.17451 | 0.59491  | -0.60922 |
| H  | 3.07611  | -4.13459 | 1.99037  | 3.01055  | -4.21393 | 2.00116  | -5.49386 | 1.36113  | 0.50203  |
| C  | 5.30202  | -4.70102 | -1.13543 | 5.36002  | -4.66655 | -1.05092 | -6.66100 | -1.07667 | -2.27763 |
| H  | 4.16575  | -3.09916 | -2.03200 | 4.25073  | -3.04291 | -1.93978 | -4.57806 | -1.59712 | -2.47465 |
| C  | 5.49383  | -5.48745 | 0.00490  | 5.51411  | -5.48732 | 0.07150  | -7.60109 | -0.28570 | -1.60908 |
| H  | 4.83658  | -5.88488 | 2.02284  | 4.78376  | -5.94994 | 2.04978  | -7.89774 | 1.20745  | -0.07787 |
| H  | 5.91885  | -4.85713 | -2.01596 | 6.01230  | -4.79060 | -1.91079 | -6.98084 | -1.75972 | -3.05973 |
| H  | 6.26258  | -6.25481 | 0.01558  | 6.28901  | -6.24835 | 0.08895  | -8.65473 | -0.35502 | -1.86392 |
| C  | 3.50327  | 3.50037  | -0.02274 | 3.50030  | 3.52102  | 0.02451  | 0.09418  | -4.69633 | 1.07137  |
| C  | 3.70045  | 4.29641  | 1.11644  | 3.66214  | 3.65011  | 1.14650  | 0.59746  | -5.03209 | 2.33872  |
| C  | 4.31572  | 3.71151  | -1.14759 | 4.36315  | 3.68984  | -1.07139 | -0.35620 | -5.72559 | 0.22879  |
| C  | 4.69157  | 5.28092  | 1.13153  | 4.66012  | 5.32760  | 1.17120  | 0.64324  | -6.36444 | 2.75675  |
| H  | 3.07626  | 4.13445  | 1.99040  | 3.00514  | 4.21787  | 2.00110  | 0.94758  | -4.24083 | 2.99541  |
| C  | 5.30214  | 4.70089  | -1.13541 | 5.35401  | 4.67342  | -1.05099 | -0.30674 | -7.05856 | 0.64422  |
| H  | 4.16579  | 3.09910  | -2.03201 | 4.24677  | 3.04837  | -1.93983 | -0.73685 | -5.47420 | -0.75689 |
| C  | 5.49400  | 5.48728  | 0.00493  | 5.50707  | 5.49439  | 0.07141  | 0.19158  | -7.38186 | 1.91034  |
| H  | 4.83680  | 5.88467  | 2.02289  | 4.77616  | 5.95610  | 2.04970  | 1.02970  | -6.60644 | 3.74278  |
| H  | 5.91897  | 4.85701  | -2.01596 | 6.00614  | 4.79827  | -1.91087 | -0.65331 | -7.84344 | -0.02219 |
| H  | 6.26277  | 6.25461  | 0.01562  | 6.28103  | 6.25639  | 0.08885  | 0.22883  | -8.41808 | 2.23402  |
| C  | -3.50276 | 3.49746  | -0.08183 | -3.51127 | 3.51476  | -0.03736 | 4.85355  | 0.06709  | -0.98100 |
| C  | -4.32437 | 3.70888  | 1.03641  | -4.37928 | 3.65977  | 1.05806  | 5.80406  | 0.83372  | -0.28258 |
| C  | -3.69830 | 4.28546  | -1.22678 | -3.67056 | 4.36594  | -1.14322 | 5.29740  | -0.73613 | -2.04712 |
| C  | -5.31714 | 4.69160  | 1.01233  | -5.37194 | 4.64160  | 1.05339  | 7.15426  | 0.79694  | -0.63689 |
| H  | -4.17635 | 3.10185  | 1.92483  | -4.26522 | 3.00103  | 1.91374  | 5.47575  | 1.45129  | 0.54832  |
| C  | -4.69584 | 5.26327  | -1.25381 | -4.67073 | 5.34143  | -1.15255 | 6.64721  | -0.77261 | -2.40374 |
| H  | -3.06799 | 4.12266  | -2.09620 | -3.01012 | 4.25219  | -1.99782 | 4.57228  | -1.32694 | -2.59952 |
| C  | -5.50681 | 5.47049  | -0.13350 | -5.52234 | 5.48455  | -0.05303 | 7.58144  | -0.00607 | -1.69970 |
| H  | -5.94086 | 4.84810  | 1.88790  | -6.02776 | 4.74788  | 1.91294  | 7.87329  | 1.39081  | -0.07933 |
| H  | -4.83962 | 5.86091  | -2.14954 | -4.78486 | 5.98683  | -2.01896 | 6.96783  | -1.39518 | -3.23447 |
| H  | -6.28063 | 6.23254  | -0.15346 | -6.29790 | 6.24509  | -0.05841 | 8.63155  | -0.03414 | -1.97615 |
| Zn | 0.00372  | 0.00000  | 0.50945  | -0.00338 | 0.00000  | -0.00039 | -0.00261 | 0.12125  | 0.05174  |
| H  | 0.07274  | 0.00022  | 2.13897  | 1.08613  | -0.00045 | 2.39274  | -0.16744 | 0.54603  | 2.00144  |
